# Supplementary material for: Dynamic Impacts of the Inhibition of the Molecular Chaperone Hsp90 on the T-Cell Proteome Have Implications for Anti-Cancer Therapy
Source: PLoS One. 2013 Nov 27;8(11):e80425. doi: 10.1371/journal.pone.0080425 (PMC3842317; doi:10.1371/journal.pone.0080425)
Supplement: Table S3 — Main stSILAC quality-filtered dataset filtered by occurrence (3333 proteins); includes medians, GO annotation and cluster assignment for all proteins (XLS). (XLSX) [file pone.0080425.s012.xlsx]

## Sheet: proteinGroups_final
id	Protein.IDs	Protein.Names	Gene.Names	Protein.Descriptions	Uniprot	Uniprot.Name	Proteins	Peptides..seq.	Razor.Peptides..seq.	Unique.Peptides..seq.	Sequence.Coverage....	Unique.Sequence.Coverage....	Mol..Weight..kDa.	Sequence.Length	T0	Median T6h (log2)	Median T20h (log2)	T0.1	Mean T6h	Mean T20h	Cluster index	Correlation	Value t-test tp1	P-value t-test tp1	P-value corrected tp1	P-value corrected tp1 < 0.05?	Value t-test tp2	P-value t-test tp2	P-value corrected tp2	P-value corrected tp2 < 0.05?	P-value tp1 OR tp2 < 0.05?	P-value tp1 AND tp2 < 0.05?	P-value tp1 OR tp2 < 0.01?	P-value tp1 AND tp2 < 0.01?	id	Reviewed IDs	GO Component IDs	Which Reviewed ID for Component IDs	GO Function IDs	Which Reviewed ID for Function IDs	GO Process IDs	Which Reviewed ID for Process IDs	GO Component Names	Which Reviewed ID for Component Names	GO Function Names	Which Reviewed ID for Function Names	GO Process Names	Which Reviewed ID for Process Names	id
115	IPI:IPI00000643.1	BAG family molecular chaperone regulator 2;Bcl-2-associated athanogene 2	BAG2	BAG family molecular chaperone regulator 2	O95816	BAG2_HUMAN	4	14	14	13	61.6	58.8	23.772	211	0	0.146886	0.340829	0	0.124796	0.323281	2	0.996838	4.50679	0.0458728	0.395643	FALSE	17.7878	0.00314559	0.0347039	TRUE	+				115	;O95816(IPI00000643)			GO:0051087	1	GO:0006457;GO:0019538	1;1			chaperone binding	1	protein folding;protein metabolic process	1;1	O95816
130	IPI:IPI00000811.2	Proteasome subunit beta type-6;Proteasome delta chain;Macropain delta chain;Multicatalytic endopeptidase complex delta chain;Proteasome subunit Y	PSMB6;LMPY	Proteasome subunit beta type-6	P28072	PSB6_HUMAN	1	8	8	8	39.3	39.3	25.357	239	0	0.0669157	0.147709	0	0.0985254	0.153854	2	0.998532	2.12624	0.167357	0.569812	FALSE	11.5695	0.00738812	0.0438227	TRUE	+				130	;P28072(IPI00000811)	GO:0000502;GO:0005737;GO:0005829;GO:0005634;GO:0005654;GO:0005839	1;1;1;1;1;1	GO:0008233;GO:0016787;GO:0004175;GO:0004298	1;1;1;1	GO:0051603;GO:0000209;GO:0043066;GO:0016032;GO:0006915;GO:0042590;GO:0034641;GO:0006508;GO:0002479;GO:0000082;GO:0051439;GO:0000278;GO:0006521;GO:0044281;GO:0002474;GO:0051437;GO:0006511;GO:0016070;GO:0051436;GO:0010467;GO:0031145;GO:0006977;GO:0019048;GO:0016071;GO:0042981	1;1;1;1;1;1;1;1;1;1;1;1;1;1;1;1;1;1;1;1;1;1;1;1;1	proteasome core complex;nucleoplasm;proteasome complex;nucleus;cytoplasm;cytosol	1;1;1;1;1;1	endopeptidase activity;peptidase activity;hydrolase activity;threonine-type endopeptidase activity	1;1;1;1	negative regulation of apoptotic process;antigen processing and presentation of peptide antigen via MHC class I;mitotic cell cycle;anaphase-promoting complex-dependent proteasomal ubiquitin-dependent protein catabolic process;DNA damage response, signal transduction by p53 class mediator resulting in cell cycle arrest;mRNA metabolic process;proteolysis;gene expression;positive regulation of ubiqu…	1;1;1;1;1;1;1;1;1;1;1;1;1;1;1;1;1;1;1;1;1;1;1;1;1	P28072
138	IPI:IPI00000877.1	Hypoxia up-regulated protein 1;150 kDa oxygen-regulated protein;Orp150	HYOU1;ORP150	Hypoxia up-regulated protein 1	Q9Y4L1	HYOU1_HUMAN	2	39	39	39	45.8	45.8	111.33	999	0	0.261322	0.64318	0	0.271792	0.635971	2	0.994197	14.6297	0.00463976	0.309054	FALSE	21.5098	0.00215439	0.0330512	TRUE	+				138	;Q9Y4L1(IPI00000877)	GO:0005788;GO:0005783;GO:0005576;GO:0071682	1;1;1;1	GO:0005524;GO:0000166	1;1	GO:0030968;GO:0044267;GO:0006950;GO:0006987	1;1;1;1	endoplasmic reticulum;endoplasmic reticulum lumen;extracellular region;endocytic vesicle lumen	1;1;1;1	ATP binding;nucleotide binding	1;1	activation of signaling protein activity involved in unfolded protein response;response to stress;cellular protein metabolic process;endoplasmic reticulum unfolded protein response	1;1;1;1	Q9Y4L1
219	IPI:IPI00002460.4;IPI:IPI00021771.1	Annexin A7;Annexin-7;Annexin VII;Synexin	ANXA7;ANX7;SNX;OK/SW-cl.95	Isoform 1 of Annexin A7;Isoform 2 of Annexin A7	P20073-1;P20073;P20073-2	ANXA7_HUMAN	2	12	12	12	32.4	32.4	52.739	488	0	0.139487	0.349275	0	0.140214	0.339092	2	0.993316	10.3114	0.00927441	0.309054	FALSE	16.5239	0.00364248	0.0350487	TRUE	+				219	;P20073(IPI00021771;IPI00002460)	GO:0005635;GO:0031982;GO:0005829;GO:0042584;GO:0005886;GO:0005634;GO:0005789	1;1;1;1;1;1;1	GO:0005544;GO:0005515;GO:0048306;GO:0005509	1;1;1;1	GO:0008360;GO:0009651;GO:0006874;GO:0007599;GO:0035176;GO:0009992;GO:0008283	1;1;1;1;1;1;1	vesicle;nucleus;plasma membrane;endoplasmic reticulum membrane;nuclear envelope;chromaffin granule membrane;cytosol	1;1;1;1;1;1;1	calcium-dependent protein binding;calcium-dependent phospholipid binding;protein binding;calcium ion binding	1;1;1;1	cellular water homeostasis;cell proliferation;social behavior;regulation of cell shape;response to salt stress;cellular calcium ion homeostasis;hemostasis	1;1;1;1;1;1;1	P20073
282	IPI:IPI00003362.2	78 kDa glucose-regulated protein;GRP 78;Heat shock 70 kDa protein 5;Immunoglobulin heavy chain-binding protein;Endoplasmic reticulum lumenal Ca(2+)-binding protein grp78	HSPA5;GRP78	HSPA5 protein	P11021	GRP78_HUMAN	1	42	40	40	53	53	72.421	655	0	0.595456	0.839131	0	0.576071	0.842807	2	0.971936	16.5181	0.00364504	0.309054	FALSE	98.6858	0.000102665	0.0172877	TRUE	+				282	;P11021(IPI00003362)	GO:0005788;GO:0005783;GO:0042470;GO:0005737;GO:0030496;GO:0034663;GO:0008180;GO:0005634;GO:0005793;GO:0009986;GO:0030176;GO:0005789	1;1;1;1;1;1;1;1;1;1;1;1	GO:0005524;GO:0030674;GO:0031625;GO:0051087;GO:0051787;GO:0005515;GO:0000166;GO:0016887;GO:0043022;GO:0019904;GO:0051082;GO:0005509	1;1;1;1;1;1;1;1;1;1;1;1	GO:0007596;GO:0030968;GO:0030433;GO:0030168;GO:0071353;GO:0021680;GO:0051603;GO:0044267;GO:0002576;GO:0043066;GO:0021589;GO:0006983;GO:0042149;GO:0030512;GO:0006987;GO:0060904;GO:0031398;GO:0006200	1;1;1;1;1;1;1;1;1;1;1;1;1;1;1;1;1;1	endoplasmic reticulum-Golgi intermediate compartment;integral to endoplasmic reticulum membrane;midbody;nucleus;endoplasmic reticulum chaperone complex;endoplasmic reticulum membrane;melanosome;endoplasmic reticulum;endoplasmic reticulum lumen;cytoplasm;cell surface;COP9 signalosome	1;1;1;1;1;1;1;1;1;1;1;1	misfolded protein binding;ribosome binding;ATP binding;ATPase activity;chaperone binding;ubiquitin protein ligase binding;unfolded protein binding;protein binding, bridging;nucleotide binding;protein binding;calcium ion binding;protein domain specific binding	1;1;1;1;1;1;1;1;1;1;1;1	platelet degranulation;cellular response to interleukin-4;negative regulation of transforming growth factor beta receptor signaling pathway;cerebellar Purkinje cell layer development;cerebellum structural organization;positive regulation of protein ubiquitination;platelet activation;activation of signaling protein activity involved in unfolded protein response;regulation of protein folding in end…	1;1;1;1;1;1;1;1;1;1;1;1;1;1;1;1;1;1	P11021
322	IPI:IPI00003856.1	V-type proton ATPase subunit E 1;Vacuolar proton pump subunit E 1;V-ATPase 31 kDa subunit	ATP6V1E1;ATP6E;ATP6E2	V-type proton ATPase subunit E 1	P36543	VATE1_HUMAN	2	7	7	7	28.8	28.8	26.145	226	0	0.0959346	0.338878	0	0.0966297	0.340243	2	0.970037	2.87029	0.102972	0.503003	FALSE	14.6717	0.00461344	0.0374517	TRUE	+				322	;P36543(IPI00003856)	GO:0016324;GO:0005737;GO:0005829;GO:0005739;GO:0016469;GO:0005902;GO:0005768;GO:0033178	1;1;1;1;1;1;1;1	GO:0016787;GO:0005515;GO:0046961;GO:0008553	1;1;1;1	GO:0008286;GO:0033572;GO:0006810;GO:0015991;GO:0006879;GO:0090382;GO:0051701;GO:0015992;GO:0055085;GO:0006811	1;1;1;1;1;1;1;1;1;1	mitochondrion;proton-transporting two-sector ATPase complex, catalytic domain;endosome;apical plasma membrane;proton-transporting two-sector ATPase complex;cytoplasm;cytosol;microvillus	1;1;1;1;1;1;1;1	proton-transporting ATPase activity, rotational mechanism;hydrogen-exporting ATPase activity, phosphorylative mechanism;hydrolase activity;protein binding	1;1;1;1	proton transport;transferrin transport;transport;ion transport;ATP hydrolysis coupled proton transport;phagosome maturation;transmembrane transport;insulin receptor signaling pathway;interaction with host;cellular iron ion homeostasis	1;1;1;1;1;1;1;1;1;1	P36543
450	IPI:IPI00005605.4;IPI:IPI00218503.1	Protein NDRG3	NDRG3	Isoform 1 of Protein NDRG3;Isoform 2 of Protein NDRG3;Isoform 3 of Protein NDRG3	Q9UGV2-1;Q9UGV2;Q9UGV2-2;Q9UGV2-3	NDRG3_HUMAN	3	8	8	8	26.9	26.9	41.408	375	0	0.197186	0.328389	0	0.15408	0.350754	2	0.993339	2.01654	0.181271	0.581685	FALSE	11.9563	0.00692273	0.0431561	TRUE	+				450	;Q9UGV2(IPI00218503;IPI00005605)	GO:0005737	1	GO:0003674	1	GO:0030308;GO:0030154;GO:0007283	1;1;1	cytoplasm	1	molecular_function	1	cell differentiation;spermatogenesis;negative regulation of cell growth	1;1;1	Q9UGV2
725	IPI:IPI00008575.3;IPI:IPI00385834.3	KH domain-containing, RNA-binding, signal transduction-associated protein 1;p21 Ras GTPase-activating protein-associated p62;GAP-associated tyrosine phosphoprotein p62;Src-associated in mitosis 68 kDa protein;p68	KHDRBS1;SAM68	Isoform 1 of KH domain-containing, RNA-binding, signal transduction-associated protein 1;Isoform 2 of KH domain-containing, RNA-binding, signal transduction-associated protein 1;Isoform 3 of KH domain-containing, RNA-binding, signal transduction-associated	Q07666-1;Q07666;Q07666-2;Q07666-3	KHDR1_HUMAN	3	10	10	8	18.7	17.4	48.227	443	0	0.116068	0.171232	0	0.128703	0.172069	2	0.979559	7.5847	0.0169425	0.335461	FALSE	13.6664	0.00531153	0.0384265	TRUE	+				725	;Q07666(IPI00385834;IPI00008575)	GO:0016020;GO:0005737;GO:0005634;GO:0070618	1;1;1;1	GO:0003677;GO:0003723;GO:0005515;GO:0017124;GO:0005070;GO:0032403	1;1;1;1;1;1	GO:0007166;GO:0046831;GO:0007165;GO:0006397;GO:0006351;GO:0000086;GO:0045892;GO:0006355;GO:0007050;GO:0045948;GO:0008283;GO:0046833;GO:0031647;GO:0007049	1;1;1;1;1;1;1;1;1;1;1;1;1;1	Grb2-Sos complex;nucleus;cytoplasm;membrane	1;1;1;1	DNA binding;RNA binding;SH3/SH2 adaptor activity;protein binding;SH3 domain binding;protein complex binding	1;1;1;1;1;1	negative regulation of transcription, DNA-dependent;positive regulation of translational initiation;transcription, DNA-dependent;regulation of RNA export from nucleus;cell cycle arrest;cell surface receptor signaling pathway;regulation of transcription, DNA-dependent;cell proliferation;G2/M transition of mitotic cell cycle;signal transduction;regulation of protein stability;mRNA processing;cell c…	1;1;1;1;1;1;1;1;1;1;1;1;1;1	Q07666
803	IPI:IPI00009634.1	Sulfide:quinone oxidoreductase, mitochondrial	SQRDL;CGI-44	Sulfide:quinone oxidoreductase, mitochondrial	Q9Y6N5	SQRD_HUMAN	1	11	11	11	28.7	28.7	49.96	450	0	0.367333	1.16217	0	0.429419	1.18377	2	0.978183	3.5412	0.0713186	0.435583	FALSE	35.8977	0.000775109	0.0266972	TRUE	+				803	;Q9Y6N5(IPI00009634)	GO:0005737;GO:0005739;GO:0005743	1;1;1	GO:0070224;GO:0016491	1;1	GO:0000096;GO:0070221;GO:0055114;GO:0044281;GO:0034641;GO:0000098	1;1;1;1;1;1	mitochondrion;mitochondrial inner membrane;cytoplasm	1;1;1	oxidoreductase activity;sulfide:quinone oxidoreductase activity	1;1	oxidation-reduction process;sulfide oxidation, using sulfide:quinone oxidoreductase;sulfur amino acid metabolic process;small molecule metabolic process;cellular nitrogen compound metabolic process;sulfur amino acid catabolic process	1;1;1;1;1;1	Q9Y6N5
832	IPI:IPI00009904.1	Protein disulfide-isomerase A4;Protein ERp-72	PDIA4;ERP70;ERP72	Protein disulfide-isomerase A4	P13667	PDIA4_HUMAN	1	34	34	34	47.1	47.1	72.932	645	0	0.224247	0.516296	0	0.24326	0.506976	2	0.997138	6.78856	0.0210176	0.347928	FALSE	21.1893	0.00221982	0.0330512	TRUE	+				832	;P13667(IPI00009904)	GO:0005788;GO:0005783;GO:0042470;GO:0009986	1;1;1;1	GO:0015035;GO:0005515;GO:0003756;GO:0009055;GO:0016853	1;1;1;1;1	GO:0006457;GO:0009306;GO:0045454;GO:0006662	1;1;1;1	melanosome;endoplasmic reticulum;endoplasmic reticulum lumen;cell surface	1;1;1;1	protein disulfide isomerase activity;isomerase activity;electron carrier activity;protein binding;protein disulfide oxidoreductase activity	1;1;1;1;1	cell redox homeostasis;protein folding;protein secretion;glycerol ether metabolic process	1;1;1;1	P13667
849	IPI:IPI00010130.3	Glutamine synthetase;Glutamate--ammonia ligase	GLUL;GLNS	Glutamine synthetase	P15104	GLNA_HUMAN	1	9	9	9	24.1	24.1	42.064	373	0	0.41546	1.0711	0	0.311204	1.06258	2	0.991723	2.14038	0.16567	0.569812	FALSE	18.3023	0.002972	0.0347039	TRUE	+				849	;P15104(IPI00010130)	GO:0042995;GO:0005791;GO:0005737;GO:0005829;GO:0005739;GO:0043679;GO:0043231;GO:0005622;GO:0043204;GO:0043005;GO:0043234	1;1;1;1;1;1;1;1;1;1;1	GO:0000287;GO:0005524;GO:0004356;GO:0016874;GO:0016829;GO:0000166;GO:0045503;GO:0030145;GO:0004351;GO:0042802;GO:0003824;GO:0016595	1;1;1;1;1;1;1;1;1;1;1;1	GO:0009749;GO:0044281;GO:0051260;GO:0051968;GO:0006538;GO:0006536;GO:0034641;GO:0008652;GO:0032024;GO:0006542;GO:0006807;GO:0008283;GO:0001504;GO:0007268;GO:0050679	1;1;1;1;1;1;1;1;1;1;1;1;1;1;1	mitochondrion;neuron projection;cell projection;intracellular membrane-bounded organelle;intracellular;protein complex;cytoplasm;cytosol;rough endoplasmic reticulum;perikaryon;axon terminus	1;1;1;1;1;1;1;1;1;1;1	lyase activity;magnesium ion binding;dynein light chain binding;catalytic activity;glutamate decarboxylase activity;ATP binding;glutamate-ammonia ligase activity;identical protein binding;glutamate binding;nucleotide binding;ligase activity;manganese ion binding	1;1;1;1;1;1;1;1;1;1;1;1	positive regulation of epithelial cell proliferation;synaptic transmission;positive regulation of synaptic transmission, glutamatergic;glutamate catabolic process;neurotransmitter uptake;small molecule metabolic process;positive regulation of insulin secretion;cell proliferation;protein homooligomerization;nitrogen compound metabolic process;cellular amino acid biosynthetic process;glutamine bios…	1;1;1;1;1;1;1;1;1;1;1;1;1;1;1	P15104
909	IPI:IPI00010796.1	Protein disulfide-isomerase;Prolyl 4-hydroxylase subunit beta;Cellular thyroid hormone-binding protein;p55	P4HB;ERBA2L;PDI;PDIA1;PO4DB	Protein disulfide-isomerase	P07237	PDIA1_HUMAN	1	34	34	34	61.2	61.2	57.116	508	0	0.108408	0.268528	0	0.0965087	0.266915	2	0.993876	2.56565	0.124232	0.529806	FALSE	41.4706	0.000580952	0.0244565	TRUE	+				909	;P07237(IPI00010796)	GO:0016020;GO:0005788;GO:0005783;GO:0042470;GO:0005576;GO:0005886;GO:0005793;GO:0009986	1;1;1;1;1;1;1;1	GO:0015035;GO:0046982;GO:0005515;GO:0004656;GO:0003756;GO:0009055;GO:0016853	1;1;1;1;1;1;1	GO:0042157;GO:0006457;GO:0018401;GO:0030198;GO:0044281;GO:0045454;GO:0006662	1;1;1;1;1;1;1	endoplasmic reticulum-Golgi intermediate compartment;plasma membrane;melanosome;endoplasmic reticulum;endoplasmic reticulum lumen;extracellular region;cell surface;membrane	1;1;1;1;1;1;1;1	procollagen-proline 4-dioxygenase activity;protein disulfide isomerase activity;isomerase activity;electron carrier activity;protein heterodimerization activity;protein binding;protein disulfide oxidoreductase activity	1;1;1;1;1;1;1	cell redox homeostasis;lipoprotein metabolic process;peptidyl-proline hydroxylation to 4-hydroxy-L-proline;protein folding;small molecule metabolic process;extracellular matrix organization;glycerol ether metabolic process	1;1;1;1;1;1;1	P07237
910	IPI:IPI00010810.1	Electron transfer flavoprotein subunit alpha, mitochondrial	ETFA	Electron transfer flavoprotein subunit alpha, mitochondrial	P13804	ETFA_HUMAN	1	12	12	12	46.2	46.2	35.079	333	0	0.0526055	0.195171	0	0.0541171	0.187064	2	0.966367	1.09883	0.386447	0.732918	FALSE	21.8394	0.00209005	0.0330512	TRUE	+				910	;P13804(IPI00010810)	GO:0005759;GO:0005739	1;1	GO:0050660;GO:0016491;GO:0009055	1;1;1	GO:0044237;GO:0044281;GO:0022900;GO:0022904	1;1;1;1	mitochondrion;mitochondrial matrix	1;1	oxidoreductase activity;electron carrier activity;flavin adenine dinucleotide binding	1;1;1	small molecule metabolic process;respiratory electron transport chain;electron transport chain;cellular metabolic process	1;1;1;1	P13804
1111	IPI:IPI00013508.5	Alpha-actinin-1;Alpha-actinin cytoskeletal isoform;Non-muscle alpha-actinin-1;F-actin cross-linking protein	ACTN1	Alpha-actinin-1	P12814	ACTN1_HUMAN	3	46	27	27	59.1	39.3	103.06	892	0	0.0566504	0.142981	0	0.0452543	0.144663	2	0.992895	2.553	0.125244	0.529806	FALSE	11.6468	0.00729145	0.043741	TRUE	+				1111	;P12814(IPI00013508)	GO:0016020;GO:0042995;GO:0005737;GO:0030018;GO:0005829;GO:0005576;GO:0031143;GO:0043197;GO:0005886;GO:0005856;GO:0070062;GO:0005634;GO:0005925;GO:0031093;GO:0005916;GO:0001726	1;1;1;1;1;1;1;1;1;1;1;1;1;1;1;1	GO:0051015;GO:0017166;GO:0003779;GO:0046872;GO:0044325;GO:0005515;GO:0005178;GO:0019904;GO:0005509	1;1;1;1;1;1;1;1;1	GO:0034329;GO:0007596;GO:0002576;GO:0051017;GO:0030198;GO:0051764;GO:0030168;GO:0048041;GO:0042981;GO:0051271	1;1;1;1;1;1;1;1;1;1	Z disc;pseudopodium;dendritic spine;fascia adherens;focal adhesion;nucleus;plasma membrane;cell projection;platelet alpha granule lumen;cytoplasm;cytosol;extracellular vesicular exosome;extracellular region;cytoskeleton;membrane;ruffle	1;1;1;1;1;1;1;1;1;1;1;1;1;1;1;1	integrin binding;vinculin binding;protein binding;actin binding;actin filament binding;ion channel binding;calcium ion binding;protein domain specific binding;metal ion binding	1;1;1;1;1;1;1;1;1	platelet degranulation;focal adhesion assembly;platelet activation;actin crosslink formation;regulation of apoptotic process;cell junction assembly;blood coagulation;actin filament bundle assembly;extracellular matrix organization;negative regulation of cellular component movement	1;1;1;1;1;1;1;1;1;1	P12814
1172	IPI:IPI00014213.1	Probable leucyl-tRNA synthetase, mitochondrial;Leucine--tRNA ligase	LARS2;KIAA0028	Probable leucyl-tRNA synthetase, mitochondrial	Q15031	SYLM_HUMAN	1	16	16	16	19.4	19.4	101.97	903	0	0.127632	0.381299	0	0.105319	0.391554	2	0.982273	3.51446	0.0722925	0.435678	FALSE	15.0895	0.00436316	0.0372528	TRUE	+				1172	;Q15031(IPI00014213)	GO:0005759;GO:0005739	1;1	GO:0002161;GO:0005524;GO:0016874;GO:0000166;GO:0004823;GO:0004812	1;1;1;1;1;1	GO:0006418;GO:0006412;GO:0006450;GO:0006429;GO:0010467	1;1;1;1;1	mitochondrion;mitochondrial matrix	1;1	aminoacyl-tRNA editing activity;ATP binding;aminoacyl-tRNA ligase activity;leucine-tRNA ligase activity;nucleotide binding;ligase activity	1;1;1;1;1;1	leucyl-tRNA aminoacylation;tRNA aminoacylation for protein translation;gene expression;translation;regulation of translational fidelity	1;1;1;1;1	Q15031
1267	IPI:IPI00015842.1	Reticulocalbin-1	RCN1;RCN	Reticulocalbin-1	Q15293	RCN1_HUMAN	1	7	7	7	19.9	19.9	38.89	331	0	0.106232	0.247849	0	0.0678706	0.262742	2	0.99662	0.903546	0.461602	0.771879	FALSE	15.9828	0.00389184	0.0355093	TRUE	+				1267	;Q15293(IPI00015842)	GO:0005788;GO:0005783	1;1	GO:0005515;GO:0046872;GO:0005509	1;1;1	GO:0043010;GO:0001701	1;1	endoplasmic reticulum;endoplasmic reticulum lumen	1;1	protein binding;calcium ion binding;metal ion binding	1;1;1	in utero embryonic development;camera-type eye development	1;1	Q15293
1282	IPI:IPI00015947.5	DnaJ homolog subfamily B member 1;Heat shock 40 kDa protein 1;HSP40;DnaJ protein homolog 1;HDJ-1	DNAJB1;DNAJ1;HDJ1;HSPF1	DnaJ homolog subfamily B member 1	P25685	DNJB1_HUMAN	1	19	19	18	41.8	41.8	38.044	340	0	1.06648	2.54688	0	1.00118	2.56432	2	0.995627	12.1413	0.0067155	0.309054	FALSE	110.513	8.18685e-05	0.0170815	TRUE	+				1282	;P25685(IPI00015947)	GO:0005737;GO:0005730;GO:0005634	1;1;1	GO:0051082	1	GO:0070389;GO:0006457;GO:0006986;GO:0051085;GO:0006950	1;1;1;1;1	nucleus;cytoplasm;nucleolus	1;1;1	unfolded protein binding	1	response to unfolded protein;chaperone cofactor-dependent protein refolding;protein folding;chaperone mediated protein folding requiring cofactor;response to stress	1;1;1;1;1	P25685
1295	IPI:IPI00016249.4	Fragile X mental retardation syndrome-related protein 1	FXR1	Isoform 1 of Fragile X mental retardation syndrome-related protein 1;Isoform 2 of Fragile X mental retardation syndrome-related protein 1;Isoform 3 of Fragile X mental retardation syndrome-related protein 1	P51114-1;P51114;P51114-2;P51114-3	FXR1_HUMAN	3	17	17	15	34.1	31.6	69.72	621	0	0.173082	0.563353	0	0.125779	0.555929	2	0.976112	2.3498	0.143205	0.554589	FALSE	13.4171	0.00550912	0.0391854	TRUE	+				1295	;P51114(IPI00016249)	GO:0005737;GO:0005730;GO:0005634;GO:0043034;GO:0005844	1;1;1;1;1	GO:0003723;GO:0003730;GO:0002151	1;1;1	GO:0017148;GO:0030154;GO:0006915;GO:0007275;GO:0007517	1;1;1;1;1	nucleus;polysome;cytoplasm;nucleolus;costamere	1;1;1;1;1	mRNA 3'-UTR binding;RNA binding;G-quadruplex RNA binding	1;1;1	cell differentiation;muscle organ development;negative regulation of translation;apoptotic process;multicellular organismal development	1;1;1;1;1	P51114
1328	IPI:IPI00016670.3	UPF0404 protein C11orf59	C11orf59;PP7157	RhoA activator C11orf59	Q6IAA8	CK059_HUMAN	1	5	5	5	41	41	17.745	161	0	0.0973072	0.326868	0	0.0687649	0.327229	2	0.973783	1.42838	0.289378	0.662647	FALSE	91.1484	0.000120344	0.0185407	TRUE	+				1328	;Q6IAA8(IPI00016670)	GO:0016020;GO:0071986;GO:0005886;GO:0043231;GO:0005765;GO:0031902;GO:0005764;GO:0005768;GO:0045121;GO:0005794	1;1;1;1;1;1;1;1;1;1	GO:0005085;GO:0005515;GO:0032947	1;1;1	GO:0060620;GO:0034613;GO:0032418;GO:0001919;GO:0032439;GO:0010872;GO:0032008;GO:0016049;GO:0042632;GO:0007040;GO:0010874;GO:0071230;GO:0043410;GO:0007032	1;1;1;1;1;1;1;1;1;1;1;1;1;1	membrane raft;late endosome membrane;plasma membrane;lysosome;endosome;intracellular membrane-bounded organelle;Golgi apparatus;Ragulator complex;lysosomal membrane;membrane	1;1;1;1;1;1;1;1;1;1	protein complex scaffold;guanyl-nucleotide exchange factor activity;protein binding	1;1;1	positive regulation of TOR signaling cascade;regulation of cholesterol esterification;cellular protein localization;regulation of cholesterol efflux;endosome organization;positive regulation of MAPK cascade;cellular response to amino acid stimulus;cholesterol homeostasis;lysosome organization;cell growth;regulation of receptor recycling;regulation of cholesterol import;lysosome localization;endos…	1;1;1;1;1;1;1;1;1;1;1;1;1;1	Q6IAA8
1354	IPI:IPI00017160.3	Vacuolar protein sorting-associated protein VTA1 homolog;Dopamine-responsive protein DRG-1;SKD1 binding protein 1;LYST-interacting protein 5	VTA1;C6orf55;HSPC228;My012	Vacuolar protein sorting-associated protein VTA1 homolog	Q9NP79	VTA1_HUMAN	1	10	10	10	36.5	36.5	33.879	307	0	0.0609206	0.190596	0	0.0483202	0.188957	2	0.978992	2.56568	0.12423	0.529806	FALSE	60.5691	0.000272471	0.0194783	TRUE	+				1354	;Q9NP79(IPI00017160)	GO:0010008;GO:0016020;GO:0005737;GO:0005829;GO:0005768	1;1;1;1;1	GO:0005515	1	GO:0015031;GO:0019067;GO:0006810;GO:0016197;GO:0016032;GO:0016044	1;1;1;1;1;1	endosome;cytoplasm;cytosol;endosome membrane;membrane	1;1;1;1;1	protein binding	1	endosomal transport;cellular membrane organization;viral process;transport;protein transport;viral assembly, maturation, egress, and release	1;1;1;1;1;1	Q9NP79
1417	IPI:IPI00018235.3	Peflin;PEF protein with a long N-terminal hydrophobic domain;Penta-EF hand domain-containing protein 1	PEF1;ABP32;UNQ1845/PRO3573	Peflin	Q9UBV8	PEF1_HUMAN	1	4	4	4	15.5	15.5	30.381	284	0	0.142083	0.233772	0	0.120977	0.244346	2	0.992344	2.60475	0.121176	0.526265	FALSE	10.3853	0.00914481	0.0477073	TRUE	+				1417	;Q9UBV8(IPI00018235)	GO:0016020;GO:0005737	1;1	GO:0046982;GO:0046983;GO:0005515;GO:0046872;GO:0005509	1;1;1;1;1	GO:0051592	1	cytoplasm;membrane	1;1	protein dimerization activity;protein heterodimerization activity;protein binding;calcium ion binding;metal ion binding	1;1;1;1;1	response to calcium ion	1	Q9UBV8
1421	IPI:IPI00018272.3	Pyridoxine-5'-phosphate oxidase;Pyridoxamine-phosphate oxidase	PNPO	Pyridoxine-5'-phosphate oxidase	Q9NVS9	PNPO_HUMAN	1	7	7	7	29.1	29.1	29.988	261	0	0.0963277	0.144559	0	0.103533	0.145087	2	0.982045	3.38827	0.0771585	0.443322	FALSE	22.3652	0.00199321	0.0330512	TRUE	+				1421	;Q9NVS9(IPI00018272)	GO:0005829	1	GO:0004733;GO:0016491;GO:0010181;GO:0016638	1;1;1;1	GO:0042823;GO:0055114;GO:0044281;GO:0006766;GO:0006767;GO:0042816;GO:0008615	1;1;1;1;1;1;1	cytosol	1	oxidoreductase activity, acting on the CH-NH2 group of donors;FMN binding;oxidoreductase activity;pyridoxamine-phosphate oxidase activity	1;1;1;1	oxidation-reduction process;vitamin B6 metabolic process;small molecule metabolic process;pyridoxine biosynthetic process;pyridoxal phosphate biosynthetic process;water-soluble vitamin metabolic process;vitamin metabolic process	1;1;1;1;1;1;1	Q9NVS9
1447	IPI:IPI00018768.1	Translin	TSN	Translin	Q15631	TSN_HUMAN	1	15	15	15	57	57	26.183	228	0	0.0627075	0.136636	0	0.0580461	0.139485	2	0.998878	0.849593	0.48503	0.781203	FALSE	16.0319	0.00386814	0.0355093	TRUE	+				1447	;Q15631(IPI00018768)	GO:0005737;GO:0005634	1;1	GO:0003723;GO:0003677;GO:0016787;GO:0005515;GO:0043565;GO:0003729;GO:0004518;GO:0004519	1;1;1;1;1;1;1;1	GO:0006310;GO:0090305	1;1	nucleus;cytoplasm	1;1	sequence-specific DNA binding;DNA binding;nuclease activity;mRNA binding;RNA binding;hydrolase activity;protein binding;endonuclease activity	1;1;1;1;1;1;1;1	DNA recombination;nucleic acid phosphodiester bond hydrolysis	1;1	Q15631
1499	IPI:IPI00019600.3	Ubiquitin-conjugating enzyme E2 variant 2;MMS2;Enterocyte differentiation-associated factor EDAF-1;Enterocyte differentiation-promoting factor;EDPF-1;Vitamin D3-inducible protein;DDVit 1	UBE2V2;MMS2;UEV2	Ubiquitin-conjugating enzyme E2 variant 2	Q15819	UB2V2_HUMAN	1	9	9	5	57.2	33.1	16.363	145	0	0.038744	0.0875357	0	0.052639	0.0866227	2	0.997811	3.35446	0.0785423	0.446879	FALSE	11.3943	0.00761449	0.0442336	TRUE	+				1499	;Q15819(IPI00019600)	GO:0005737;GO:0031372;GO:0005634	1;1;1	GO:0005515;GO:0016881	1;1	GO:0051965;GO:0032436;GO:0006282;GO:0000729;GO:0045739;GO:0000209;GO:0043524;GO:0016567;GO:0008283;GO:0010976	1;1;1;1;1;1;1;1;1;1	nucleus;UBC13-MMS2 complex;cytoplasm	1;1;1	protein binding;acid-amino acid ligase activity	1;1	DNA double-strand break processing;positive regulation of synapse assembly;cell proliferation;positive regulation of neuron projection development;protein polyubiquitination;regulation of DNA repair;positive regulation of proteasomal ubiquitin-dependent protein catabolic process;negative regulation of neuron apoptotic process;protein ubiquitination;positive regulation of DNA repair	1;1;1;1;1;1;1;1;1;1	Q15819
1501	IPI:IPI00019733.1	mRNA export factor;mRNA-associated protein mrnp 41;Rae1 protein homolog	RAE1;MRNP41	mRNA export factor	P78406	RAE1L_HUMAN	1	14	14	14	48.4	48.4	40.968	368	0	0.0425689	0.117617	0	0.056935	0.117461	2	0.987528	1.77925	0.217164	0.613678	FALSE	10.2756	0.00933841	0.0480774	TRUE	+				1501	;P78406(IPI00019733)	GO:0005643;GO:0005635;GO:0005737;GO:0005640;GO:0005856;GO:0005634	1;1;1;1;1;1	GO:0003723;GO:0008017	1;1	GO:0015758;GO:0010827;GO:0007077;GO:0000278;GO:0044281;GO:0005975;GO:0008645;GO:0016032;GO:0019221;GO:0006406;GO:0071407;GO:0055085	1;1;1;1;1;1;1;1;1;1;1;1	nucleus;nuclear envelope;cytoplasm;cytoskeleton;nuclear pore;nuclear outer membrane	1;1;1;1;1;1	microtubule binding;RNA binding	1;1	mitotic cell cycle;glucose transport;mRNA export from nucleus;viral process;hexose transport;small molecule metabolic process;transmembrane transport;cellular response to organic cyclic compound;mitotic nuclear envelope disassembly;cytokine-mediated signaling pathway;carbohydrate metabolic process;regulation of glucose transport	1;1;1;1;1;1;1;1;1;1;1;1	P78406
1586	IPI:IPI00216260.1;IPI:IPI00021016.3	Elongation factor Ts, mitochondrial	TSFM	Isoform 2 of Elongation factor Ts, mitochondrial;Isoform 1 of Elongation factor Ts, mitochondrial	P43897-2;P43897;P43897-1	EFTS_HUMAN	2	8	8	8	28	28	37.656	346	0	0.0681207	0.197768	0	0.0618217	0.21305	2	0.984249	7.76547	0.0161816	0.335222	FALSE	12.3435	0.00649941	0.0420625	TRUE	+				1586	;P43897(IPI00021016;IPI00216260)	GO:0005739;GO:0005634;GO:0005622	1;1;1	GO:0003746	1	GO:0032784;GO:0006412;GO:0006414	1;1;1	mitochondrion;nucleus;intracellular	1;1;1	translation elongation factor activity	1	regulation of DNA-dependent transcription, elongation;translational elongation;translation	1;1;1	P43897
1705	IPI:IPI00022602.2	Docking protein 2;Downstream of tyrosine kinase 2;p56(dok-2)	DOK2	Docking protein 2	O60496	DOK2_HUMAN	1	7	7	7	22.6	22.6	45.378	412	0	0.711532	2.14482	0	0.59826	2.20365	2	0.981645	4.12012	0.0541668	0.408465	FALSE	29.9252	0.0011148	0.0299023	TRUE	+				1705	;O60496(IPI00022602)	GO:0005829	1	GO:0005068;GO:0005158;GO:0005057;GO:0005543	1;1;1;1	GO:0007596;GO:0007166;GO:0007165;GO:0007169;GO:0050900;GO:0007265	1;1;1;1;1;1	cytosol	1	phospholipid binding;insulin receptor binding;receptor signaling protein activity;transmembrane receptor protein tyrosine kinase adaptor activity	1;1;1;1	Ras protein signal transduction;cell surface receptor signaling pathway;signal transduction;leukocyte migration;blood coagulation;transmembrane receptor protein tyrosine kinase signaling pathway	1;1;1;1;1;1	O60496
1718	IPI:IPI00022774.3	Transitional endoplasmic reticulum ATPase;15S Mg(2+)-ATPase p97 subunit;Valosin-containing protein	VCP	Transitional endoplasmic reticulum ATPase	P55072	TERA_HUMAN	1	49	49	49	66.9	66.9	89.321	806	0	0.0792347	0.231627	0	0.0621303	0.239872	2	0.983777	2.75981	0.110042	0.51631	FALSE	21.234	0.00221053	0.0330512	TRUE	+				1718	;P55072(IPI00022774)	GO:0005783;GO:0000502;GO:0005737;GO:0005730;GO:0005829;GO:0043231;GO:0005634;GO:0035861;GO:0043234	1;1;1;1;1;1;1;1;1	GO:0005524;GO:0031593;GO:0019903;GO:0005102;GO:0005515;GO:0016787;GO:0000166;GO:0017111;GO:0016887;GO:0042802;GO:0008289;GO:0019904;GO:0032403	1;1;1;1;1;1;1;1;1;1;1;1;1	GO:0032436;GO:0030968;GO:0030433;GO:0019985;GO:0031334;GO:0006919;GO:0030970;GO:0006511;GO:0006810;GO:0070842;GO:0051260;GO:0006302;GO:0016567;GO:0006974;GO:0045184;GO:0006281;GO:0018279;GO:0008219;GO:0043161;GO:0045732;GO:0006200;GO:0006888;GO:0042981	1;1;1;1;1;1;1;1;1;1;1;1;1;1;1;1;1;1;1;1;1;1;1	proteasome complex;nucleus;intracellular membrane-bounded organelle;endoplasmic reticulum;protein complex;cytoplasm;cytosol;site of double-strand break;nucleolus	1;1;1;1;1;1;1;1;1	protein phosphatase binding;ATP binding;lipid binding;ATPase activity;identical protein binding;receptor binding;polyubiquitin binding;hydrolase activity;nucleoside-triphosphatase activity;nucleotide binding;protein binding;protein complex binding;protein domain specific binding	1;1;1;1;1;1;1;1;1;1;1;1;1	cell death;proteasomal ubiquitin-dependent protein catabolic process;translesion synthesis;ER to Golgi vesicle-mediated transport;double-strand break repair;transport;response to DNA damage stimulus;protein homooligomerization;ER-associated protein catabolic process;DNA repair;activation of cysteine-type endopeptidase activity involved in apoptotic process;positive regulation of proteasomal ubiqu…	1;1;1;1;1;1;1;1;1;1;1;1;1;1;1;1;1;1;1;1;1;1;1	P55072
1765	IPI:IPI00023406.1	Cytochrome c-type heme lyase;Holocytochrome c-type synthase	HCCS;CCHL	Cytochrome c-type heme lyase	P53701	CCHL_HUMAN	1	6	6	6	23.1	23.1	30.601	268	0	0.0635255	0.173301	0	0.0744524	0.170193	2	0.988337	3.45075	0.0746923	0.440871	FALSE	37.6252	0.000705638	0.0262713	TRUE	+				1765	;P53701(IPI00023406)	GO:0016020;GO:0005739;GO:0005743	1;1;1	GO:0016829;GO:0004408;GO:0046872	1;1;1	GO:0055114;GO:0009887	1;1	mitochondrion;mitochondrial inner membrane;membrane	1;1;1	lyase activity;holocytochrome-c synthase activity;metal ion binding	1;1;1	oxidation-reduction process;organ morphogenesis	1;1	P53701
1816	IPI:IPI00024157.1	FK506-binding protein 3;Peptidyl-prolyl cis-trans isomerase;25 kDa FKBP;FKBP-25;Rapamycin-selective 25 kDa immunophilin	FKBP3;FKBP25	FK506-binding protein 3	Q00688	FKBP3_HUMAN	1	17	17	17	57.1	57.1	25.177	224	0	0.0521982	0.182555	0	0.055473	0.182993	2	0.970782	2.65739	0.117225	0.524563	FALSE	164.881	3.6782e-05	0.0130872	TRUE	+				1816	;Q00688(IPI00024157)	GO:0016020;GO:0005634	1;1	GO:0003755;GO:0004872;GO:0016853;GO:0005528	1;1;1;1	GO:0006457;GO:0018208;GO:0000413	1;1;1	nucleus;membrane	1;1	FK506 binding;peptidyl-prolyl cis-trans isomerase activity;receptor activity;isomerase activity	1;1;1;1	peptidyl-proline modification;protein folding;protein peptidyl-prolyl isomerization	1;1;1	Q00688
1819	IPI:IPI00024175.3	Proteasome subunit alpha type-7;Proteasome subunit RC6-1;Proteasome subunit XAPC7	PSMA7	Isoform 1 of Proteasome subunit alpha type-7	O14818-1;O14818	PSA7_HUMAN	5	15	15	15	56.9	56.9	27.887	248	0	0.0448555	0.166726	0	0.0534288	0.160917	2	0.966229	3.02995	0.093844	0.485374	FALSE	16.6884	0.00357141	0.0347039	TRUE	+				1819	;O14818(IPI00024175)	GO:0019773;GO:0000502;GO:0005737;GO:0005829;GO:0005654;GO:0005634;GO:0005839	1;1;1;1;1;1;1	GO:0008233;GO:0016787;GO:0005515;GO:0004175;GO:0004298;GO:0042802	1;1;1;1;1;1	GO:0006915;GO:0042590;GO:0000278;GO:0006521;GO:0044281;GO:0006511;GO:0016070;GO:0051436;GO:0031145;GO:0016071;GO:0051603;GO:0000209;GO:0043066;GO:0016032;GO:0034641;GO:0006508;GO:0002479;GO:0000082;GO:0051439;GO:0002474;GO:0051437;GO:0010467;GO:0019048;GO:0006977;GO:0042981	1;1;1;1;1;1;1;1;1;1;1;1;1;1;1;1;1;1;1;1;1;1;1;1;1	proteasome core complex;nucleoplasm;proteasome complex;nucleus;cytoplasm;cytosol;proteasome core complex, alpha-subunit complex	1;1;1;1;1;1;1	endopeptidase activity;peptidase activity;identical protein binding;hydrolase activity;threonine-type endopeptidase activity;protein binding	1;1;1;1;1;1	antigen processing and presentation of peptide antigen via MHC class I;mitotic cell cycle;anaphase-promoting complex-dependent proteasomal ubiquitin-dependent protein catabolic process;DNA damage response, signal transduction by p53 class mediator resulting in cell cycle arrest;positive regulation of ubiquitin-protein ligase activity involved in mitotic cell cycle;antigen processing and presentat…	1;1;1;1;1;1;1;1;1;1;1;1;1;1;1;1;1;1;1;1;1;1;1;1;1	O14818
1902	IPI:IPI00025252.1	Protein disulfide-isomerase A3;Disulfide isomerase ER-60;ERp60;58 kDa microsomal protein;p58;ERp57;58 kDa glucose-regulated protein	PDIA3;ERP57;ERP60;GRP58	Protein disulfide-isomerase A3	P30101	PDIA3_HUMAN	1	34	34	34	61.6	61.6	56.782	505	0	0.127231	0.377502	0	0.140513	0.388428	2	0.982752	8.96979	0.012202	0.316271	FALSE	17.6252	0.0032036	0.0347039	TRUE	+				1902	;P30101(IPI00025252)	GO:0005788;GO:0005783;GO:0042470;GO:0009986	1;1;1;1	GO:0015035;GO:0004629;GO:0005515;GO:0003756;GO:0009055;GO:0016853;GO:0004197	1;1;1;1;1;1;1	GO:0006457;GO:0007165;GO:0042590;GO:0006606;GO:0043687;GO:0045454;GO:0006621;GO:0044267;GO:0043065;GO:0006662;GO:0002479;GO:0002474;GO:0018279	1;1;1;1;1;1;1;1;1;1;1;1;1	melanosome;endoplasmic reticulum;endoplasmic reticulum lumen;cell surface	1;1;1;1	phospholipase C activity;protein disulfide isomerase activity;isomerase activity;electron carrier activity;cysteine-type endopeptidase activity;protein binding;protein disulfide oxidoreductase activity	1;1;1;1;1;1;1	antigen processing and presentation of peptide antigen via MHC class I;cell redox homeostasis;antigen processing and presentation of exogenous peptide antigen via MHC class I, TAP-dependent;antigen processing and presentation of exogenous peptide antigen via MHC class I;protein folding;signal transduction;cellular protein metabolic process;positive regulation of apoptotic process;post-translation…	1;1;1;1;1;1;1;1;1;1;1;1;1	P30101
1904	IPI:IPI00025277.5	Programmed cell death protein 6;Apoptosis-linked gene 2 protein;Probable calcium-binding protein ALG-2	PDCD6;ALG2	Programmed cell death protein 6	O75340	PDCD6_HUMAN	1	10	10	10	54.5	54.5	21.868	191	0	0.10107	0.315374	0	0.122	0.296501	2	0.979183	2.74035	0.111358	0.520419	FALSE	13.3517	0.00556279	0.0393944	TRUE	+				1904	;O75340(IPI00025277)	GO:0016020;GO:0005783;GO:0031410;GO:0005737;GO:0031965;GO:0005634;GO:0005789	1;1;1;1;1;1;1	GO:0046983;GO:0005515;GO:0048306;GO:0042803;GO:0046872;GO:0060090;GO:0005509	1;1;1;1;1;1;1	GO:0006915;GO:0006919;GO:0032007;GO:0001938;GO:0033554;GO:0097190;GO:0010595;GO:0036324;GO:0045766;GO:0051898;GO:0006886;GO:0051592;GO:0030948	1;1;1;1;1;1;1;1;1;1;1;1;1	nucleus;endoplasmic reticulum membrane;endoplasmic reticulum;cytoplasm;nuclear membrane;cytoplasmic vesicle;membrane	1;1;1;1;1;1;1	calcium-dependent protein binding;protein dimerization activity;protein homodimerization activity;binding, bridging;protein binding;calcium ion binding;metal ion binding	1;1;1;1;1;1;1	apoptotic signaling pathway;intracellular protein transport;negative regulation of TOR signaling cascade;vascular endothelial growth factor receptor-2 signaling pathway;cellular response to stress;negative regulation of protein kinase B signaling cascade;apoptotic process;positive regulation of angiogenesis;positive regulation of endothelial cell migration;activation of cysteine-type endopeptidas…	1;1;1;1;1;1;1;1;1;1;1;1;1	O75340
1978	IPI:IPI00026337.1;IPI:IPI00456728.3;IPI:IPI00456729.1	Ran-binding protein 3	RANBP3	Isoform 1 of Ran-binding protein 3;Isoform 2 of Ran-binding protein 3;Isoform 3 of Ran-binding protein 3	Q9H6Z4-1;Q9H6Z4;Q9H6Z4-2;Q9H6Z4-3	RANB3_HUMAN	4	8	8	8	16.4	16.4	60.209	567	0	0.134914	0.36515	0	0.124687	0.35451	2	0.988832	8.28792	0.0142478	0.328575	FALSE	11.0917	0.00803065	0.0445804	TRUE	+				1978	;Q9H6Z4(IPI00026337;IPI00456729;IPI00456728)	GO:0005737;GO:0005730;GO:0005634	1;1;1	GO:0005515;GO:0070412;GO:0008536	1;1;1	GO:0015031;GO:0006810;GO:0046907	1;1;1	nucleus;cytoplasm;nucleolus	1;1;1	R-SMAD binding;Ran GTPase binding;protein binding	1;1;1	intracellular transport;transport;protein transport	1;1;1	Q9H6Z4
1979	IPI:IPI00026358.3	Gamma-aminobutyric acid receptor-associated protein-like 2;GABA(A) receptor-associated protein-like 2;Golgi-associated ATPase enhancer of 16 kDa;General protein transport factor p16;Ganglioside expression factor 2;MAP1 light chain 3-related protein	GABARAPL2;FLC3A;GEF2	Gamma-aminobutyric acid receptor-associated protein-like 2	P60520	GBRL2_HUMAN	1	6	6	5	50.4	50.4	13.667	117	0	0.113286	0.335412	0	0.101762	0.329854	2	0.982899	1.03807	0.408273	0.742786	FALSE	35.0207	0.000814364	0.0276777	TRUE	+				1979	;P60520(IPI00026358)	GO:0031410;GO:0005737;GO:0000139;GO:0005829;GO:0005776;GO:0005622;GO:0005794;GO:0000421	1;1;1;1;1;1;1;1	GO:0000149;GO:0051117;GO:0048487;GO:0005515;GO:0050811;GO:0008017	1;1;1;1;1;1	GO:0006914;GO:0015031;GO:0006891;GO:0006810;GO:0032781;GO:1901799	1;1;1;1;1;1	autophagic vacuole membrane;Golgi membrane;Golgi apparatus;intracellular;autophagic vacuole;cytoplasm;cytosol;cytoplasmic vesicle	1;1;1;1;1;1;1;1	microtubule binding;GABA receptor binding;ATPase binding;SNARE binding;beta-tubulin binding;protein binding	1;1;1;1;1;1	positive regulation of ATPase activity;autophagy;transport;negative regulation of proteasomal protein catabolic process;protein transport;intra-Golgi vesicle-mediated transport	1;1;1;1;1;1	P60520
2037	IPI:IPI00027230.3	Endoplasmin;Heat shock protein 90 kDa beta member 1;94 kDa glucose-regulated protein;gp96 homolog;Tumor rejection antigen 1	HSP90B1;TRA1	Endoplasmin	P14625	ENPL_HUMAN	2	47	44	44	51.3	49.6	92.468	803	0	0.321913	0.77584	0	0.325007	0.775437	2	0.995209	35.2409	0.000804232	0.292937	FALSE	535.081	3.49268e-06	0.00445552	TRUE	+		+		2037	;P14625(IPI00027230)	GO:0005788;GO:0005783;GO:0042470;GO:0030496;GO:0005829;GO:0005576;GO:0005886;GO:0048471;GO:0005789;GO:0071682	1;1;1;1;1;1;1;1;1;1	GO:0003723;GO:0005524;GO:0019903;GO:0005515;GO:0000166;GO:0051082;GO:0005509;GO:0046790;GO:0050750	1;1;1;1;1;1;1;1;1	GO:0015031;GO:0030968;GO:0006457;GO:0030433;GO:0071318;GO:0051208;GO:0002224;GO:0043666;GO:0044267;GO:0045087;GO:0043066;GO:0001666;GO:0006950;GO:0031247;GO:0006987	1;1;1;1;1;1;1;1;1;1;1;1;1;1;1	midbody;plasma membrane;endoplasmic reticulum membrane;melanosome;endoplasmic reticulum;endoplasmic reticulum lumen;perinuclear region of cytoplasm;cytosol;extracellular region;endocytic vesicle lumen	1;1;1;1;1;1;1;1;1;1	protein phosphatase binding;ATP binding;RNA binding;low-density lipoprotein particle receptor binding;unfolded protein binding;nucleotide binding;protein binding;virion binding;calcium ion binding	1;1;1;1;1;1;1;1;1	cellular response to ATP;activation of signaling protein activity involved in unfolded protein response;sequestering of calcium ion;protein folding;actin rod assembly;response to stress;innate immune response;cellular protein metabolic process;negative regulation of apoptotic process;ER-associated protein catabolic process;protein transport;toll-like receptor signaling pathway;regulation of phosp…	1;1;1;1;1;1;1;1;1;1;1;1;1;1;1	P14625
2064	IPI:IPI00554481.1;IPI:IPI00604710.2;IPI:IPI00554722.1;IPI:IPI00027493.1	4F2 cell-surface antigen heavy chain;Lymphocyte activation antigen 4F2 large subunit;4F2 heavy chain antigen	SLC3A2;MDU1	Isoform 4 of 4F2 cell-surface antigen heavy chain;Isoform 1 of 4F2 cell-surface antigen heavy chain;Isoform 3 of 4F2 cell-surface antigen heavy chain;Isoform 2 of 4F2 cell-surface antigen heavy chain	P08195-4;P08195;P08195-1;P08195-3;P08195-2	4F2_HUMAN	4	24	24	24	40.7	40.7	71.122	661	0	0.141043	0.298963	0	0.138144	0.308205	2	0.999469	4.11362	0.0543245	0.408465	FALSE	14.6481	0.0046282	0.0374517	TRUE	+				2064	;P08195(IPI00027493;IPI00554722;IPI00604710;IPI00554481)	GO:0016020;GO:0016324;GO:0042470;GO:0016021;GO:0005886;GO:0009986	1;1;1;1;1;1	GO:0005515;GO:0015175;GO:0005432;GO:0003824;GO:0043169	1;1;1;1;1	GO:0007596;GO:0016049;GO:0005975;GO:0006810;GO:0050900;GO:0006816;GO:0006865;GO:0015827;GO:0055085;GO:0006811;GO:0060356	1;1;1;1;1;1;1;1;1;1;1	integral to membrane;plasma membrane;melanosome;apical plasma membrane;cell surface;membrane	1;1;1;1;1;1	neutral amino acid transmembrane transporter activity;catalytic activity;calcium:sodium antiporter activity;cation binding;protein binding	1;1;1;1;1	transport;ion transport;cell growth;leukocyte migration;transmembrane transport;leucine import;calcium ion transport;blood coagulation;carbohydrate metabolic process;amino acid transport;tryptophan transport	1;1;1;1;1;1;1;1;1;1;1	P08195
2070	IPI:IPI00027626.3	T-complex protein 1 subunit zeta;CCT-zeta;CCT-zeta-1;Tcp20;HTR3;Acute morphine dependence-related protein 2	CCT6A;CCT6;CCTZ	T-complex protein 1 subunit zeta	P40227	TCPZ_HUMAN	1	31	31	27	58.9	53.3	58.024	531	0	0.0692325	0.245994	0	0.0568238	0.244063	2	0.969599	4.40692	0.047827	0.396777	FALSE	37.6626	0.000704239	0.0262713	TRUE	+				2070	;P40227(IPI00027626)	GO:0005874;GO:0005737;GO:0005832;GO:0005829;GO:0002199;GO:0001669	1;1;1;1;1;1	GO:0005524;GO:0000166;GO:0051082	1;1;1	GO:0006457;GO:0007339;GO:0044267;GO:0051084	1;1;1;1	acrosomal vesicle;zona pellucida receptor complex;chaperonin-containing T-complex;cytoplasm;cytosol;microtubule	1;1;1;1;1;1	ATP binding;unfolded protein binding;nucleotide binding	1;1;1	protein folding;binding of sperm to zona pellucida;cellular protein metabolic process;'de novo' posttranslational protein folding	1;1;1;1	P40227
2087	IPI:IPI00027834.3	Heterogeneous nuclear ribonucleoprotein L	HNRNPL;HNRPL;P/OKcl.14	Heterogeneous nuclear ribonucleoprotein L	P14866	HNRPL_HUMAN	1	21	21	20	58.2	57	64.132	589	0	0.0696274	0.145051	0	0.0781195	0.149228	2	0.999734	5.76917	0.0287555	0.357252	FALSE	20.5839	0.00235185	0.0330512	TRUE	+				2087	;P14866(IPI00027834)	GO:0005737;GO:0005634;GO:0005654;GO:0030529	1;1;1;1	GO:0003723;GO:0005515;GO:0000166;GO:0044212;GO:0003676	1;1;1;1;1	GO:0006396;GO:0006397;GO:0000398;GO:0008380;GO:0010467	1;1;1;1;1	nucleoplasm;nucleus;ribonucleoprotein complex;cytoplasm	1;1;1;1	RNA binding;nucleotide binding;protein binding;transcription regulatory region DNA binding;nucleic acid binding	1;1;1;1;1	RNA splicing;gene expression;mRNA processing;RNA processing;mRNA splicing, via spliceosome	1;1;1;1;1	P14866
2103	IPI:IPI00028055.4	Transmembrane emp24 domain-containing protein 10;21 kDa transmembrane-trafficking protein;Transmembrane protein Tmp21;Tmp-21-I;p24delta;S31III125	TMED10;TMP21	Transmembrane emp24 domain-containing protein 10	P49755	TMEDA_HUMAN	1	7	7	7	31.1	31.1	24.976	219	0	0.104365	0.239876	0	0.0823559	0.229448	2	0.997202	3.41338	0.0761536	0.442678	FALSE	14.5545	0.0046875	0.0374517	TRUE	+				2103	;P49755(IPI00028055)	GO:0030658;GO:0016020;GO:0005783;GO:0070765;GO:0031410;GO:0030137;GO:0033116;GO:0042470;GO:0005801;GO:0016021;GO:0005886;GO:0043231;GO:0030140;GO:0030667;GO:0005793;GO:0042589;GO:0005794;GO:0005789	1;1;1;1;1;1;1;1;1;1;1;1;1;1;1;1;1;1	GO:0005515;GO:0019905;GO:0032403	1;1;1	GO:0001101;GO:0035459;GO:0048208;GO:0034205;GO:0015031;GO:0048199;GO:0006810;GO:0007030;GO:0043279;GO:0048205;GO:0051259;GO:0006886;GO:0001822;GO:0016192;GO:0045055;GO:0006890;GO:0035964;GO:0006888	1;1;1;1;1;1;1;1;1;1;1;1;1;1;1;1;1;1	endoplasmic reticulum-Golgi intermediate compartment;trans-Golgi network transport vesicle;transport vesicle membrane;endoplasmic reticulum-Golgi intermediate compartment membrane;COPI-coated vesicle;integral to membrane;plasma membrane;endoplasmic reticulum membrane;melanosome;intracellular membrane-bounded organelle;gamma-secretase complex;Golgi apparatus;endoplasmic reticulum;cis-Golgi network…	1;1;1;1;1;1;1;1;1;1;1;1;1;1;1;1;1;1	protein binding;protein complex binding;syntaxin binding	1;1;1	kidney development;vesicle targeting, to, from or within Golgi;intracellular protein transport;beta-amyloid formation;COPII vesicle coating;vesicle-mediated transport;ER to Golgi vesicle-mediated transport;response to alkaloid;transport;regulated secretory pathway;COPI-coated vesicle budding;cargo loading into vesicle;protein oligomerization;COPI coating of Golgi vesicle;protein transport;Golgi o…	1;1;1;1;1;1;1;1;1;1;1;1;1;1;1;1;1;1	P49755
2262	IPI:IPI00030847.3	Transmembrane 9 superfamily member 3;SM-11044-binding protein;EP70-P-iso	TM9SF3;SMBP;UNQ245/PRO282	Transmembrane 9 superfamily member 3	Q9HD45	TM9S3_HUMAN	1	10	10	10	20.2	20.2	67.887	589	0	0.16698	0.318988	0	0.140296	0.318608	2	0.999633	2.76287	0.109837	0.51631	FALSE	10.8441	0.00839687	0.0456638	TRUE	+				2262	;Q9HD45(IPI00030847)	GO:0016020;GO:0016021	1;1					integral to membrane;membrane	1;1					Q9HD45
2360	IPI:IPI00032140.4	Serpin H1;Collagen-binding protein;47 kDa heat shock protein;Rheumatoid arthritis-related antigen RA-A47;Arsenic-transactivated protein 3;Cell proliferation-inducing gene 14 protein	SERPINH1;CBP1;CBP2;HSP47;SERPINH2;PIG14	Serpin H1	P50454	SERPH_HUMAN	1	17	17	17	51.9	51.9	46.44	418	0	0.756729	2.60511	0	0.775756	2.60514	2	0.971959	10.0287	0.00979691	0.309054	FALSE	109.968	8.26831e-05	0.0170815	TRUE	+				2360	;P50454(IPI00032140)	GO:0005788;GO:0005783;GO:0005737;GO:0005793	1;1;1;1	GO:0004867;GO:0005518;GO:0051082	1;1;1	GO:0030199;GO:0032964;GO:0030198;GO:0010951;GO:0006986;GO:0006950;GO:0030162;GO:0051604	1;1;1;1;1;1;1;1	endoplasmic reticulum-Golgi intermediate compartment;endoplasmic reticulum;endoplasmic reticulum lumen;cytoplasm	1;1;1;1	serine-type endopeptidase inhibitor activity;unfolded protein binding;collagen binding	1;1;1	response to unfolded protein;extracellular matrix organization;response to stress;protein maturation;regulation of proteolysis;collagen fibril organization;collagen biosynthetic process;negative regulation of endopeptidase activity	1;1;1;1;1;1;1;1	P50454
2430	IPI:IPI00033075.3	Protein BAT5;HLA-B-associated transcript 5;Protein G5	BAT5;G5;NG26;PP199	Protein BAT5	O95870	BAT5_HUMAN	1	9	9	9	17.6	17.6	63.243	558	0	0.0933411	0.166688	0	0.0682835	0.174281	2	0.99761	2.0205	0.180742	0.581685	FALSE	12.8569	0.00599526	0.0408352	TRUE	+				2430	;O95870(IPI00033075)	GO:0016020;GO:0016021	1;1	GO:0016787	1			integral to membrane;membrane	1;1	hydrolase activity	1			O95870
2646	IPI:IPI00093057.6	Coproporphyrinogen-III oxidase, mitochondrial	CPOX;CPO;CPX	Coproporphyrinogen-III oxidase, mitochondrial	P36551	HEM6_HUMAN	1	13	13	13	37.7	37.7	50.151	454	0	0.173082	0.297284	0	0.173469	0.289053	2	0.995524	6.66415	0.0217839	0.349545	FALSE	27.5954	0.0013106	0.03031	TRUE	+				2646	;P36551(IPI00093057)	GO:0005737;GO:0005739;GO:0005758;GO:0005743	1;1;1;1	GO:0016491;GO:0042802;GO:0042803;GO:0004109	1;1;1;1	GO:0046685;GO:0051597;GO:0010035;GO:0055114;GO:0044281;GO:0010288;GO:0006783;GO:0006778;GO:0006782;GO:0010039;GO:0017085;GO:0006779	1;1;1;1;1;1;1;1;1;1;1;1	mitochondrion;mitochondrial inner membrane;mitochondrial intermembrane space;cytoplasm	1;1;1;1	oxidoreductase activity;coproporphyrinogen oxidase activity;protein homodimerization activity;identical protein binding	1;1;1;1	porphyrin-containing compound metabolic process;oxidation-reduction process;response to inorganic substance;protoporphyrinogen IX biosynthetic process;response to methylmercury;response to iron ion;small molecule metabolic process;response to arsenic-containing substance;response to lead ion;response to insecticide;heme biosynthetic process;porphyrin-containing compound biosynthetic process	1;1;1;1;1;1;1;1;1;1;1;1	P36551
2660	IPI:IPI00099550.1	Ubiquilin-1;Protein linking IAP with cytoskeleton 1	UBQLN1;DA41;PLIC1	Isoform 1 of Ubiquilin-1;Isoform 2 of Ubiquilin-1	Q9UMX0-1;Q9UMX0;Q9UMX0-2	UBQL1_HUMAN	2	12	12	7	32.9	25.8	62.518	589	0	0.115036	0.321882	0	0.0906067	0.3236	2	0.986711	2.05754	0.175894	0.579806	FALSE	22.4423	0.00197959	0.0330512	TRUE	+				2660	;Q9UMX0(IPI00099550)	GO:0005783;GO:0000502;GO:0005737;GO:0005634;GO:0048471;GO:0043234	1;1;1;1;1;1	GO:0005515;GO:0019900	1;1	GO:0031396;GO:0097194;GO:0034976;GO:0071456	1;1;1;1	proteasome complex;nucleus;endoplasmic reticulum;protein complex;perinuclear region of cytoplasm;cytoplasm	1;1;1;1;1;1	kinase binding;protein binding	1;1	response to endoplasmic reticulum stress;cellular response to hypoxia;execution phase of apoptosis;regulation of protein ubiquitination	1;1;1;1	Q9UMX0
2670	IPI:IPI00100154.1	Toll-interacting protein	TOLLIP	Toll-interacting protein	Q9H0E2	TOLIP_HUMAN	1	4	4	4	19	19	30.281	274	0	0.104563	0.349519	0	0.0869035	0.356998	2	0.974147	4.1468	0.0535268	0.407891	FALSE	22.0867	0.00204365	0.0330512	TRUE	+				2670	;Q9H0E2(IPI00100154)	GO:0045092;GO:0005737;GO:0016604;GO:0005829;GO:0048471;GO:0045323	1;1;1;1;1;1	GO:0031625;GO:0031624;GO:0035325;GO:0005515;GO:0019900;GO:0032183;GO:0004871;GO:0005150	1;1;1;1;1;1;1;1	GO:0045321;GO:0033235;GO:0007165;GO:0007267;GO:0006954;GO:0016310;GO:0045087;GO:0035556	1;1;1;1;1;1;1;1	nuclear body;interleukin-1 receptor complex;perinuclear region of cytoplasm;cytoplasm;cytosol;interleukin-18 receptor complex	1;1;1;1;1;1	SUMO binding;kinase binding;ubiquitin protein ligase binding;Toll-like receptor binding;interleukin-1, Type I receptor binding;signal transducer activity;protein binding;ubiquitin conjugating enzyme binding	1;1;1;1;1;1;1;1	inflammatory response;intracellular signal transduction;leukocyte activation;cell-cell signaling;innate immune response;signal transduction;positive regulation of protein sumoylation;phosphorylation	1;1;1;1;1;1;1;1	Q9H0E2
2822	IPI:IPI00151462.3;IPI:IPI00220482.8	Microtubule-associated proteins 1A/1B light chain 3 beta 2;Microtubule-associated proteins 1A/1B light chain 3B-like;Microtubule-associated proteins 1A/1B light chain 3B;Microtubule-associated protein 1 light chain 3 beta;MAP1A/1B light chain 3 B;MAP1A/MAP1B LC3 B;MAP1 light chain 3-like protein 2;Autophagy-related protein LC3 B;Autophagy-related ubiquitin-like modifier LC3 B	MAP1LC3B2;MAP1LC3B;MAP1ALC3	Microtubule-associated proteins 1A/1B light chain 3 beta 2;Microtubule-associated proteins 1A/1B light chain 3B	A6NCE7;Q9GZQ8	MP3B2_HUMAN;MLP3B_HUMAN	4	4	4	4	29.6	29.6	14.628	125	0	0.323442	0.605506	0	0.163202	0.62794	2	0.999223	1.011	0.418438	0.744169	FALSE	17.146	0.00338429	0.0347039	TRUE	+				2822	;Q9GZQ8(IPI00220482);A6NCE7(IPI00151462)	GO:0016020;GO:0005874;GO:0031410;GO:0031090;GO:0005737;GO:0012505;GO:0005776;GO:0005856;GO:0005622;GO:0000421	1+2;1+2;1+2;1;1+2;1+2;1;1+2;1;1+2	GO:0005515	1	GO:0006914	1+2	autophagic vacuole membrane;endomembrane system;intracellular;autophagic vacuole;cytoplasm;cytoplasmic vesicle;organelle membrane;cytoskeleton;microtubule;membrane	1+2;1+2;1;1;1+2;1+2;1;1+2;1+2;1+2	protein binding	1	autophagy	1+2	Q9GZQ8+A6NCE7
3004	IPI:IPI00168388.1	Signal recognition particle 68 kDa protein	SRP68	Isoform 1 of Signal recognition particle 68 kDa protein;Isoform 2 of Signal recognition particle 68 kDa protein	Q9UHB9-1;Q9UHB9;Q9UHB9-2	SRP68_HUMAN	2	29	29	29	50.1	50.1	70.729	627	0	0.0822621	0.190087	0	0.0607516	0.204295	2	0.996999	2.31738	0.146397	0.554589	FALSE	12.5855	0.00625421	0.0413025	TRUE	+				3004	;Q9UHB9(IPI00168388)	GO:0005840;GO:0005783;GO:0005737;GO:0005730;GO:0005829;GO:0005634;GO:0005786;GO:0030529	1;1;1;1;1;1;1;1	GO:0003723;GO:0008312;GO:0005047;GO:0030942	1;1;1;1	GO:0006412;GO:0044267;GO:0042493;GO:0006614;GO:0010467	1;1;1;1;1	ribosome;signal recognition particle, endoplasmic reticulum targeting;nucleus;ribonucleoprotein complex;endoplasmic reticulum;cytoplasm;cytosol;nucleolus	1;1;1;1;1;1;1;1	7S RNA binding;signal recognition particle binding;endoplasmic reticulum signal peptide binding;RNA binding	1;1;1;1	response to drug;cellular protein metabolic process;gene expression;translation;SRP-dependent cotranslational protein targeting to membrane	1;1;1;1;1	Q9UHB9
3115	IPI:IPI00177728.3	Cytosolic non-specific dipeptidase;CNDP dipeptidase 2;Glutamate carboxypeptidase-like protein 1;Peptidase A	CNDP2;CN2;CPGL;PEPA	Isoform 1 of Cytosolic non-specific dipeptidase;Isoform 2 of Cytosolic non-specific dipeptidase	Q96KP4-1;Q96KP4;Q96KP4-2	CNDP2_HUMAN	2	21	21	21	50.7	50.7	52.878	475	0	0.0590372	0.183179	0	0.0606762	0.178079	2	0.979589	9.90717	0.0100352	0.309054	FALSE	33.184	0.000906882	0.0289343	TRUE	+				3115	;Q96KP4(IPI00177728)	GO:0005737;GO:0005829	1;1	GO:0004180;GO:0008233;GO:0016787;GO:0008237;GO:0046872;GO:0034701;GO:0016805	1;1;1;1;1;1;1	GO:0000096;GO:0008152;GO:0044281;GO:0006805;GO:0006508;GO:0034641;GO:1901687;GO:0006750	1;1;1;1;1;1;1;1	cytoplasm;cytosol	1;1	metallopeptidase activity;carboxypeptidase activity;peptidase activity;hydrolase activity;dipeptidase activity;tripeptidase activity;metal ion binding	1;1;1;1;1;1;1	sulfur amino acid metabolic process;small molecule metabolic process;proteolysis;xenobiotic metabolic process;cellular nitrogen compound metabolic process;glutathione biosynthetic process;metabolic process;glutathione derivative biosynthetic process	1;1;1;1;1;1;1;1	Q96KP4
3117	IPI:IPI00219368.4;IPI:IPI00177938.2	Transducin-like enhancer protein 3;ESG3	TLE3;KIAA1547	Isoform 1 of Transducin-like enhancer protein 3;Isoform 2 of Transducin-like enhancer protein 3	Q04726-1;Q04726;Q04726-2	TLE3_HUMAN	3	11	11	1	19.3	2.3	83.416	772	0	0.164915	0.453312	0	0.15414	0.462166	2	0.987858	2.86448	0.103327	0.503003	FALSE	10.1035	0.00965461	0.0487708	TRUE	+				3117	;Q04726(IPI00177938;IPI00219368)	GO:0005654;GO:0005634	1;1	GO:0005515	1	GO:0007165;GO:0016055;GO:0007219;GO:0006351;GO:0009887;GO:0006355	1;1;1;1;1;1	nucleoplasm;nucleus	1;1	protein binding	1	Wnt receptor signaling pathway;transcription, DNA-dependent;organ morphogenesis;regulation of transcription, DNA-dependent;Notch signaling pathway;signal transduction	1;1;1;1;1;1	Q04726
3310	IPI:IPI00216691.5	Profilin-1;Profilin I	PFN1	Profilin-1	P07737	PROF1_HUMAN	2	13	13	13	88.6	88.6	15.054	140	0	0.0471143	0.171584	0	0.0461555	0.176035	2	0.967755	2.07257	0.173977	0.57544	FALSE	15.9944	0.00388622	0.0355093	TRUE	+				3310	;P07737(IPI00216691)	GO:0005737;GO:0045202;GO:0005856;GO:0005634;GO:0043005	1;1;1;1;1	GO:0017048;GO:0005102;GO:0005515;GO:0070064;GO:0005546;GO:0003779	1;1;1;1;1;1	GO:0007596;GO:0071363;GO:0030036;GO:0045944;GO:0030168;GO:0051054;GO:0050434;GO:0002576;GO:0001843;GO:0006357;GO:0010033;GO:0008219;GO:0051496	1;1;1;1;1;1;1;1;1;1;1;1;1	neuron projection;nucleus;cytoplasm;synapse;cytoskeleton	1;1;1;1;1	phosphatidylinositol-4,5-bisphosphate binding;proline-rich region binding;receptor binding;Rho GTPase binding;actin binding;protein binding	1;1;1;1;1;1	platelet degranulation;positive regulation of DNA metabolic process;cell death;platelet activation;neural tube closure;actin cytoskeleton organization;cellular response to growth factor stimulus;positive regulation of transcription from RNA polymerase II promoter;positive regulation of viral transcription;response to organic substance;blood coagulation;positive regulation of stress fiber assembly…	1;1;1;1;1;1;1;1;1;1;1;1;1	P07737
3359	IPI:IPI00217519.3	Ras-related protein Ral-A	RALA;RAL	Ras-related protein Ral-A	P11233	RALA_HUMAN	2	5	5	5	23.8	23.8	23.567	206	0	0.129285	0.278745	0	0.0789401	0.293861	2	0.999128	0.803535	0.505989	0.789693	FALSE	10.9074	0.0083009	0.0454152	TRUE	+				3359	;P11233(IPI00217519)	GO:0016020;GO:0030496;GO:0005886;GO:0030659;GO:0009986;GO:0030139;GO:0032154	1;1;1;1;1;1;1	GO:0005515;GO:0000166;GO:0031755;GO:0003924;GO:0005525	1;1;1;1;1	GO:0048011;GO:0007165;GO:0006184;GO:0007264;GO:0006935;GO:0031532;GO:0051301;GO:0007265;GO:0017157;GO:0000910;GO:0051665;GO:0016044;GO:0051491;GO:0019048;GO:0007049;GO:0006887	1;1;1;1;1;1;1;1;1;1;1;1;1;1;1;1	cytoplasmic vesicle membrane;cleavage furrow;midbody;plasma membrane;endocytic vesicle;cell surface;membrane	1;1;1;1;1;1;1	GTP binding;GTPase activity;nucleotide binding;Edg-2 lysophosphatidic acid receptor binding;protein binding	1;1;1;1;1	Ras protein signal transduction;cell division;positive regulation of filopodium assembly;GTP catabolic process;cellular membrane organization;neurotrophin TRK receptor signaling pathway;regulation of exocytosis;chemotaxis;signal transduction;membrane raft localization;cytokinesis;exocytosis;actin cytoskeleton reorganization;cell cycle;modulation by virus of host morphology or physiology;small GTP…	1;1;1;1;1;1;1;1;1;1;1;1;1;1;1;1	P11233
3449	IPI:IPI00939163.1;IPI:IPI00513743.1;IPI:IPI00218993.1	Heat shock protein 105 kDa;Heat shock 110 kDa protein;Antigen NY-CO-25	HSPH1;HSP105;HSP110;KIAA0201	Isoform Alpha of Heat shock protein 105 kDa;Isoform 3 of Heat shock protein 105 kDa;Isoform Beta of Heat shock protein 105 kDa	Q92598-1;Q92598;Q92598-3;Q92598-2	HS105_HUMAN	3	15	12	12	21.3	18.4	96.864	858	0	0.312586	1.12569	0	0.321106	1.14505	2	0.968594	4.06906	0.0554232	0.410491	FALSE	44.9266	0.000495075	0.0235882	TRUE	+				3449	;Q92598(IPI00218993;IPI00939163;IPI00513743)	GO:0005874;GO:0005737;GO:0005730;GO:0005576;GO:0005634;GO:0071682	1;1;1;1;1;1	GO:0005524;GO:0000166;GO:0043014	1;1;1	GO:0045345;GO:0006986;GO:0051085;GO:0051135;GO:0006950	1;1;1;1;1	nucleus;cytoplasm;extracellular region;nucleolus;endocytic vesicle lumen;microtubule	1;1;1;1;1;1	ATP binding;nucleotide binding;alpha-tubulin binding	1;1;1	response to unfolded protein;positive regulation of MHC class I biosynthetic process;response to stress;positive regulation of NK T cell activation;chaperone mediated protein folding requiring cofactor	1;1;1;1;1	Q92598
3454	IPI:IPI00219029.3	Aspartate aminotransferase, cytoplasmic;Transaminase A;Glutamate oxaloacetate transaminase 1	GOT1	Aspartate aminotransferase, cytoplasmic	P17174	AATC_HUMAN	1	20	20	20	61	61	46.247	413	0	0.105314	0.336004	0	0.106063	0.32999	2	0.977572	5.89685	0.0275742	0.357252	FALSE	21.9759	0.00206423	0.0330512	TRUE	+				3454	;P17174(IPI00219029)	GO:0005737;GO:0005829;GO:0043679;GO:0005764	1;1;1;1	GO:0047801;GO:0030170;GO:0031406;GO:0004069;GO:0003824;GO:0004609;GO:0080130;GO:0008483;GO:0016740	1;1;1;1;1;1;1;1;1	GO:0019550;GO:0009058;GO:0000096;GO:0006595;GO:0006006;GO:0006520;GO:0006094;GO:0006103;GO:0044281;GO:0006107;GO:0005975;GO:0051384;GO:0032869;GO:0043648;GO:0006532;GO:0019509;GO:0006114;GO:0006536;GO:0034641;GO:0008652;GO:0055089;GO:0006531;GO:0019551;GO:0006533	1;1;1;1;1;1;1;1;1;1;1;1;1;1;1;1;1;1;1;1;1;1;1;1	lysosome;cytoplasm;cytosol;axon terminus	1;1;1;1	phosphatidylserine decarboxylase activity;L-phenylalanine:2-oxoglutarate aminotransferase activity;pyridoxal phosphate binding;carboxylic acid binding;transferase activity;catalytic activity;transaminase activity;L-aspartate:2-oxoglutarate aminotransferase activity;L-cysteine:2-oxoglutarate aminotransferase activity	1;1;1;1;1;1;1;1;1	fatty acid homeostasis;glucose metabolic process;2-oxoglutarate metabolic process;gluconeogenesis;biosynthetic process;aspartate catabolic process;glycerol biosynthetic process;oxaloacetate metabolic process;dicarboxylic acid metabolic process;sulfur amino acid metabolic process;small molecule metabolic process;aspartate biosynthetic process;cellular amino acid metabolic process;glutamate catabol…	1;1;1;1;1;1;1;1;1;1;1;1;1;1;1;1;1;1;1;1;1;1;1;1	P17174
3878	IPI:IPI00295485.1	Heat shock 70 kDa protein 4L;Osmotic stress protein 94;Heat shock 70-related protein APG-1	HSPA4L;APG1;OSP94	Heat shock 70 kDa protein 4L	O95757	HS74L_HUMAN	1	35	31	31	48.4	45.4	94.485	839	0	0.1603	0.591404	0	0.15401	0.570027	2	0.966786	2.79094	0.107982	0.511738	FALSE	20.4737	0.00237716	0.0330512	TRUE	+				3878	;O95757(IPI00295485)	GO:0005737;GO:0005634	1;1	GO:0005524;GO:0000166	1;1	GO:0006457;GO:0006986;GO:0006950	1;1;1	nucleus;cytoplasm	1;1	ATP binding;nucleotide binding	1;1	response to unfolded protein;protein folding;response to stress	1;1;1	O95757
3941	IPI:IPI00297492.2	Dolichyl-diphosphooligosaccharide--protein glycosyltransferase subunit STT3A;B5;Integral membrane protein 1;Transmembrane protein TMC	STT3A;ITM1;TMC	Dolichyl-diphosphooligosaccharide--protein glycosyltransferase subunit STT3A	P46977	STT3A_HUMAN	1	15	15	14	19.1	18.3	80.529	705	0	0.0928242	0.261016	0	0.0986779	0.265715	2	0.986387	14.2476	0.00489012	0.309054	FALSE	14.7676	0.00455414	0.0373904	TRUE	+				3941	;P46977(IPI00297492)	GO:0016020;GO:0005783;GO:0008250;GO:0016021;GO:0005789	1;1;1;1;1	GO:0004579;GO:0005515;GO:0016757;GO:0016740;GO:0004576	1;1;1;1;1	GO:0006486;GO:0043686;GO:0043687;GO:0044267;GO:0018279	1;1;1;1;1	integral to membrane;endoplasmic reticulum membrane;oligosaccharyltransferase complex;endoplasmic reticulum;membrane	1;1;1;1;1	transferase activity;dolichyl-diphosphooligosaccharide-protein glycotransferase activity;transferase activity, transferring glycosyl groups;protein binding;oligosaccharyl transferase activity	1;1;1;1;1	co-translational protein modification;cellular protein metabolic process;post-translational protein modification;protein glycosylation;protein N-linked glycosylation via asparagine	1;1;1;1;1	P46977
4012	IPI:IPI00299571.5;IPI:IPI00644989.2	Protein disulfide-isomerase A6;Protein disulfide isomerase P5;Thioredoxin domain-containing protein 7	PDIA6;TXNDC7	Isoform 2 of Protein disulfide-isomerase A6;Isoform 1 of Protein disulfide-isomerase A6	Q15084-2;Q15084;Q15084-1	PDIA6_HUMAN	2	16	16	16	39.4	39.4	53.9	492	0	0.168877	0.548251	0	0.182142	0.529059	2	0.976301	3.84879	0.0613596	0.424797	FALSE	11.994	0.00687977	0.0431561	TRUE	+				4012	;Q15084(IPI00299571;IPI00644989)	GO:0016020;GO:0005788;GO:0005783;GO:0042470;GO:0005886;GO:0005793;GO:0005789	1;1;1;1;1;1;1	GO:0015035;GO:0005515;GO:0003756;GO:0009055;GO:0016853	1;1;1;1;1	GO:0030968;GO:0006457;GO:0045454;GO:0044267;GO:0006662;GO:0006987	1;1;1;1;1;1	endoplasmic reticulum-Golgi intermediate compartment;plasma membrane;endoplasmic reticulum membrane;melanosome;endoplasmic reticulum;endoplasmic reticulum lumen;membrane	1;1;1;1;1;1;1	protein disulfide isomerase activity;isomerase activity;electron carrier activity;protein binding;protein disulfide oxidoreductase activity	1;1;1;1;1	cell redox homeostasis;activation of signaling protein activity involved in unfolded protein response;protein folding;cellular protein metabolic process;glycerol ether metabolic process;endoplasmic reticulum unfolded protein response	1;1;1;1;1;1	Q15084
4102	IPI:IPI00303158.3	N-acylneuraminate cytidylyltransferase;CMP-N-acetylneuraminic acid synthetase	CMAS	Isoform 1 of N-acylneuraminate cytidylyltransferase;Isoform 2 of N-acylneuraminate cytidylyltransferase	Q8NFW8-1;Q8NFW8;Q8NFW8-2	NEUA_HUMAN	2	9	9	9	24.4	24.4	48.379	434	0	0.0931556	0.318289	0	0.074331	0.319438	2	0.97252	1.66072	0.23865	0.62479	FALSE	70.2779	0.00020241	0.0189578	TRUE	+				4102	;Q8NFW8(IPI00303158)	GO:0005634	1	GO:0008781;GO:0016779;GO:0016740	1;1;1	GO:0006054;GO:0009103	1;1	nucleus	1	transferase activity;N-acylneuraminate cytidylyltransferase activity;nucleotidyltransferase activity	1;1;1	N-acetylneuraminate metabolic process;lipopolysaccharide biosynthetic process	1;1	Q8NFW8
4143	IPI:IPI00304596.3	Non-POU domain-containing octamer-binding protein;54 kDa nuclear RNA- and DNA-binding protein;p54(nrb);55 kDa nuclear protein;NMT55;DNA-binding p52/p100 complex, 52 kDa subunit	NONO;NRB54	Non-POU domain-containing octamer-binding protein	Q15233	NONO_HUMAN	1	28	28	26	61.6	58.6	54.231	471	0	0.0289335	0.0981397	0	0.0251174	0.101737	2	0.973063	5.09365	0.0364484	0.374574	FALSE	17.5868	0.00321754	0.0347039	TRUE	+				4143	;Q15233(IPI00304596)	GO:0042382;GO:0005730;GO:0005634;GO:0016607;GO:0016363	1;1;1;1;1	GO:0003723;GO:0003677;GO:0005515;GO:0000166;GO:0042802;GO:0003676	1;1;1;1;1;1	GO:0006310;GO:0006397;GO:0006351;GO:0008380;GO:0006355;GO:0006974;GO:0006281	1;1;1;1;1;1;1	nuclear speck;nuclear matrix;nucleus;nucleolus;paraspeckles	1;1;1;1;1	DNA binding;RNA binding;identical protein binding;nucleotide binding;protein binding;nucleic acid binding	1;1;1;1;1;1	transcription, DNA-dependent;DNA recombination;regulation of transcription, DNA-dependent;response to DNA damage stimulus;RNA splicing;DNA repair;mRNA processing	1;1;1;1;1;1;1	Q15233
4154	IPI:IPI00304925.5	Heat shock 70 kDa protein 1;HSP70.1;HSP70-1/HSP70-2	HSPA1A;HSPA1;HSPA1B	Heat shock 70 kDa protein 1	P08107	HSP71_HUMAN	1	17	12	6	30.3	11.4	70.051	641	0	1.13528	1.82348	0	1.11522	1.97893	2	0.990129	11.6739	0.00725811	0.309054	FALSE	10.341	0.00922226	0.0478642	TRUE	+				4154	;P08107(IPI00304925)	GO:0005783;GO:0005737;GO:0016234;GO:0008180;GO:0005829;GO:0005739;GO:0005634;GO:0016235;GO:0016607;GO:0048471;GO:0030529	1;1;1;1;1;1;1;1;1;1;1	GO:0005524;GO:0047485;GO:0031625;GO:0005515;GO:0000166;GO:0044183;GO:0051082	1;1;1;1;1;1;1	GO:0008285;GO:0045648;GO:0030308;GO:0016070;GO:0006402;GO:0016071;GO:0090084;GO:0042026;GO:0043066;GO:2001240;GO:0006986;GO:0006950;GO:0010467	1;1;1;1;1;1;1;1;1;1;1;1;1	mitochondrion;nuclear speck;aggresome;nucleus;ribonucleoprotein complex;endoplasmic reticulum;inclusion body;perinuclear region of cytoplasm;cytoplasm;cytosol;COP9 signalosome	1;1;1;1;1;1;1;1;1;1;1	protein binding involved in protein folding;ATP binding;protein N-terminus binding;ubiquitin protein ligase binding;unfolded protein binding;nucleotide binding;protein binding	1;1;1;1;1;1;1	negative regulation of cell proliferation;positive regulation of erythrocyte differentiation;response to unfolded protein;mRNA catabolic process;protein refolding;RNA metabolic process;negative regulation of cell growth;response to stress;negative regulation of apoptotic process;mRNA metabolic process;negative regulation of extrinsic apoptotic signaling pathway in absence of ligand;gene expressio…	1;1;1;1;1;1;1;1;1;1;1;1;1	P08107
4162	IPI:IPI00852741.1;IPI:IPI00746182.2;IPI:IPI00795507.1;IPI:IPI00515103.2;IPI:IPI00305152.6;IPI:IPI00853220.1	Protein transport protein Sec31A;SEC31-related protein A;SEC31-like 1;ABP125;ABP130;Web1-like protein	SEC31A;KIAA0905;SEC31L1;HSPC275;HSPC334	Isoform 8 of Protein transport protein Sec31A;Isoform 1 of Protein transport protein Sec31A;Isoform 2 of Protein transport protein Sec31A;Isoform 4 of Protein transport protein Sec31A;Isoform 3 of Protein transport protein Sec31A;Isoform 6 of Protein trans	O94979-8;O94979;O94979-1;O94979-2;O94979-4;O94979-3;O94979-6;O94979-7;O94979-5	SC31A_HUMAN	8	19	19	19	21.3	21.3	134.5	1233	0	0.0498728	0.140068	0	0.0692926	0.140366	2	0.986468	2.84287	0.104665	0.503003	FALSE	62.8026	0.000253443	0.0194783	TRUE	+				4162	;O94979(IPI00746182;IPI00305152;IPI00853220;IPI00795507;IPI00515103)	GO:0016020;GO:0005783;GO:0031410;GO:0005737;GO:0030134;GO:0030120;GO:0005829;GO:0043231;GO:0048471;GO:0030127;GO:0005789;GO:0012507	1;1;1;1;1;1;1;1;1;1;1;1	GO:0005515;GO:0048306	1;1	GO:0048208;GO:0015031;GO:0030968;GO:0006810;GO:0019886;GO:0043687;GO:0044267;GO:0051592;GO:0016044;GO:0016192;GO:0002474;GO:0006987;GO:0018279;GO:0006888	1;1;1;1;1;1;1;1;1;1;1;1;1;1	ER to Golgi transport vesicle membrane;vesicle coat;COPII vesicle coat;endoplasmic reticulum membrane;intracellular membrane-bounded organelle;endoplasmic reticulum;perinuclear region of cytoplasm;cytoplasm;cytosol;cytoplasmic vesicle;ER to Golgi transport vesicle;membrane	1;1;1;1;1;1;1;1;1;1;1;1	calcium-dependent protein binding;protein binding	1;1	antigen processing and presentation of peptide antigen via MHC class I;COPII vesicle coating;cellular membrane organization;vesicle-mediated transport;ER to Golgi vesicle-mediated transport;activation of signaling protein activity involved in unfolded protein response;transport;cellular protein metabolic process;post-translational protein modification;protein transport;antigen processing and pres…	1;1;1;1;1;1;1;1;1;1;1;1;1;1	O94979
4189	IPI:IPI00305978.4	Aflatoxin B1 aldehyde reductase member 2;AFB1-AR 1;Aldoketoreductase 7	AKR7A2;AFAR;AFAR1;AKR7	Aflatoxin B1 aldehyde reductase member 2	O43488	ARK72_HUMAN	3	7	7	7	25.3	25.3	39.589	359	0	0.090743	0.160615	0	0.078114	0.163137	2	0.997198	2.15462	0.163995	0.569002	FALSE	28.8235	0.0012015	0.0302484	TRUE	+				4189	;O43488(IPI00305978)	GO:0005737;GO:0005794	1;1	GO:0004032;GO:0019119;GO:0016491;GO:0009055;GO:0016616	1;1;1;1;1	GO:0055114;GO:0006081;GO:0005975;GO:0044597;GO:0044598	1;1;1;1;1	Golgi apparatus;cytoplasm	1;1	oxidoreductase activity, acting on the CH-OH group of donors, NAD or NADP as acceptor;oxidoreductase activity;electron carrier activity;alditol:NADP+ 1-oxidoreductase activity;phenanthrene-9,10-epoxide hydrolase activity	1;1;1;1;1	oxidation-reduction process;doxorubicin metabolic process;cellular aldehyde metabolic process;daunorubicin metabolic process;carbohydrate metabolic process	1;1;1;1;1	O43488
4334	IPI:IPI00329629.6	DnaJ homolog subfamily C member 7;Tetratricopeptide repeat protein 2;TPR repeat protein 2	DNAJC7;TPR2;TTC2	DnaJ homolog subfamily C member 7	Q99615	DNJC7_HUMAN	1	28	28	28	51	51	56.44	494	0	0.118531	0.391649	0	0.0814721	0.390804	2	0.975004	2.01101	0.182014	0.581685	FALSE	23.9657	0.00173654	0.0330512	TRUE	+				4334	;Q99615(IPI00329629)	GO:0005737;GO:0005730;GO:0005856;GO:0005634	1;1;1;1	GO:0031072;GO:0005515	1;1	GO:0070389;GO:0006457	1;1	nucleus;cytoplasm;nucleolus;cytoskeleton	1;1;1;1	protein binding;heat shock protein binding	1;1	chaperone cofactor-dependent protein refolding;protein folding	1;1	Q99615
4433	IPI:IPI00375441.2	Far upstream element-binding protein 1;DNA helicase V;HDH V	FUBP1	Isoform 1 of Far upstream element-binding protein 1	Q96AE4-1;Q96AE4	FUBP1_HUMAN	1	25	22	2	49.5	7	67.56	644	0	0.0834709	0.285963	0	0.0827472	0.287038	2	0.972321	2.64923	0.117826	0.524563	FALSE	30.2109	0.00109385	0.0296024	TRUE	+				4433	;Q96AE4(IPI00375441)	GO:0005730;GO:0005634	1;1	GO:0003677;GO:0003723;GO:0003697;GO:0003700	1;1;1;1	GO:0006351;GO:0010628;GO:0006355;GO:0006366	1;1;1;1	nucleus;nucleolus	1;1	DNA binding;sequence-specific DNA binding transcription factor activity;RNA binding;single-stranded DNA binding	1;1;1;1	transcription from RNA polymerase II promoter;transcription, DNA-dependent;regulation of transcription, DNA-dependent;positive regulation of gene expression	1;1;1;1	Q96AE4
4561	IPI:IPI00395568.1	PHD finger protein 6;PHD-like zinc finger protein	PHF6;KIAA1823	Isoform 1 of PHD finger protein 6;Isoform 2 of PHD finger protein 6	Q8IWS0-1;Q8IWS0;Q8IWS0-2	PHF6_HUMAN	2	9	9	9	28.2	28.2	41.29	365	0	0.17079	0.426327	0	0.174315	0.430632	2	0.993478	6.89667	0.0203837	0.34694	FALSE	10.7913	0.00847823	0.0456638	TRUE	+				4561	;Q8IWS0(IPI00395568)	GO:0005730;GO:0005634	1;1	GO:0008270;GO:0046872	1;1	GO:0006351;GO:0006355	1;1	nucleus;nucleolus	1;1	zinc ion binding;metal ion binding	1;1	transcription, DNA-dependent;regulation of transcription, DNA-dependent	1;1	Q8IWS0
4587	IPI:IPI00396279.3;IPI:IPI00744551.2;IPI:IPI00828013.3	CLIP-associating protein 1;Cytoplasmic linker-associated protein 1;Multiple asters homolog 1	CLASP1;KIAA0622;MAST1	Isoform 1 of CLIP-associating protein 1;Isoform 3 of CLIP-associating protein 1;Isoform 2 of CLIP-associating protein 1	Q7Z460-1;Q7Z460;Q7Z460-3;Q7Z460-2	CLAP1_HUMAN	3	15	10	10	11.4	8.5	169.45	1538	0	0.136542	0.322953	0	0.0609902	0.305366	2	0.99605	0.490533	0.672294	0.878327	FALSE	10.0417	0.0097719	0.0490375	TRUE	+				4587	;Q7Z460(IPI00744551;IPI00396279)	GO:0031592;GO:0005874;GO:0005938;GO:0005881;GO:0005737;GO:0005829;GO:0005819;GO:0000777;GO:0005876;GO:0005856;GO:0005815;GO:0005813;GO:0005694;GO:0030981;GO:0000775;GO:0005828;GO:0005794;GO:0000776	1;1;1;1;1;1;1;1;1;1;1;1;1;1;1;1;1;1	GO:0005515;GO:0051010;GO:0008017;GO:0043515	1;1;1;1	GO:0034453;GO:0031111;GO:0007067;GO:0010458;GO:0000278;GO:0051294;GO:0007163;GO:0007026;GO:0000226;GO:0007020;GO:0051301;GO:0000086;GO:0007411;GO:0031023;GO:0001578;GO:0007049	1;1;1;1;1;1;1;1;1;1;1;1;1;1;1;1	microtubule organizing center;cell cortex;centrosomal corona;chromosome, centromeric region;chromosome;cytoplasmic microtubule;kinetochore;spindle;spindle microtubule;Golgi apparatus;kinetochore microtubule;centrosome;condensed chromosome kinetochore;cytoplasm;cortical microtubule cytoskeleton;cytosol;cytoskeleton;microtubule	1;1;1;1;1;1;1;1;1;1;1;1;1;1;1;1;1;1	microtubule binding;microtubule plus-end binding;kinetochore binding;protein binding	1;1;1;1	mitotic cell cycle;microtubule organizing center organization;microtubule nucleation;cell division;microtubule bundle formation;negative regulation of microtubule depolymerization;microtubule cytoskeleton organization;axon guidance;negative regulation of microtubule polymerization or depolymerization;G2/M transition of mitotic cell cycle;mitosis;establishment of spindle orientation;cell cycle;mic…	1;1;1;1;1;1;1;1;1;1;1;1;1;1;1;1	Q7Z460
4754	IPI:IPI00414717.1;IPI:IPI00641153.3	Golgi apparatus protein 1;Golgi sialoglycoprotein MG-160;E-selectin ligand 1;Cysteine-rich fibroblast growth factor receptor;CFR-1	GLG1;CFR1;ESL1;MG160	Isoform 2 of Golgi apparatus protein 1;Isoform 1 of Golgi apparatus protein 1	Q92896-2;Q92896;Q92896-1	GSLG1_HUMAN	2	26	26	26	24.9	24.9	137.22	1203	0	0.12603	0.41219	0	0.118219	0.430267	2	0.975757	2.78055	0.108663	0.513085	FALSE	10.955	0.00822977	0.0451892	TRUE	+				4754	;Q92896(IPI00641153;IPI00414717)	GO:0016020;GO:0000139;GO:0016021;GO:0031012;GO:0005794	1;1;1;1;1	GO:0005102	1	GO:0010955;GO:0060349;GO:0032330;GO:0030512	1;1;1;1	extracellular matrix;Golgi membrane;integral to membrane;Golgi apparatus;membrane	1;1;1;1;1	receptor binding	1	negative regulation of transforming growth factor beta receptor signaling pathway;regulation of chondrocyte differentiation;negative regulation of protein processing;bone morphogenesis	1;1;1;1	Q92896
4757	IPI:IPI00414836.6	Osteoclast-stimulating factor 1	OSTF1	Osteoclast-stimulating factor 1	Q92882	OSTF1_HUMAN	1	8	8	8	45.8	45.8	23.787	214	0	0.041377	0.0903331	0	0.0383949	0.0932078	2	0.998829	3.25004	0.0830489	0.460178	FALSE	32.3319	0.000955246	0.0291412	TRUE	+				4757	;Q92882(IPI00414836)	GO:0005737;GO:0005622	1;1	GO:0017124	1	GO:0007165;GO:0001503	1;1	intracellular;cytoplasm	1;1	SH3 domain binding	1	ossification;signal transduction	1;1	Q92882
4766	IPI:IPI00418262.5	Fructose-bisphosphate aldolase C;Brain-type aldolase	ALDOC;ALDC	Fructose-bisphosphate aldolase	P09972	ALDOC_HUMAN	1	18	15	15	47.9	40.1	48.408	451	0	0.135176	0.248216	0	0.114902	0.229795	2	0.998677	2.28278	0.149912	0.554596	FALSE	12.3459	0.0064969	0.0420625	TRUE	+				4766	;P09972(IPI00418262)	GO:0005737;GO:0005829;GO:0005739;GO:0030424;GO:0005856	1;1;1;1;1	GO:0016829;GO:0005515;GO:0008092;GO:0004332;GO:0003824	1;1;1;1;1	GO:0031100;GO:0006096;GO:0006006;GO:0006094;GO:0051290;GO:0006915;GO:0014070;GO:0044281;GO:0005975;GO:0010243;GO:0006000;GO:0007568;GO:0030388;GO:0051289;GO:0001666	1;1;1;1;1;1;1;1;1;1;1;1;1;1;1	mitochondrion;axon;cytoplasm;cytosol;cytoskeleton	1;1;1;1;1	lyase activity;catalytic activity;cytoskeletal protein binding;fructose-bisphosphate aldolase activity;protein binding	1;1;1;1;1	glycolysis;glucose metabolic process;protein homotetramerization;gluconeogenesis;response to organic cyclic compound;aging;apoptotic process;fructose metabolic process;small molecule metabolic process;organ regeneration;protein heterotetramerization;fructose 1,6-bisphosphate metabolic process;response to hypoxia;carbohydrate metabolic process;response to organonitrogen compound	1;1;1;1;1;1;1;1;1;1;1;1;1;1;1	P09972
4844	IPI:IPI00438170.3;IPI:IPI00844112.1	Sorting nexin-12	SNX12	Isoform 1 of Sorting nexin-12;Isoform 2 of Sorting nexin-12	Q9UMY4-1;Q9UMY4;Q9UMY4-2	SNX12_HUMAN	2	7	6	6	34.3	30.2	19.73	172	0	0.120865	0.37235	0	0.135421	0.390082	2	0.9801	1.67202	0.236485	0.624764	FALSE	10.9857	0.0081844	0.0451856	TRUE	+				4844	;Q9UMY4(IPI00438170;IPI00844112)	GO:0016020	1	GO:0005515;GO:0035091;GO:0008289	1;1;1	GO:0015031;GO:0007154;GO:0006810	1;1;1	membrane	1	phosphatidylinositol binding;lipid binding;protein binding	1;1;1	transport;cell communication;protein transport	1;1;1	Q9UMY4
5061	IPI:IPI00514053.1	Coatomer subunit delta;Delta-coat protein	ARCN1;COPD	Coatomer subunit delta	P48444	COPD_HUMAN	1	27	27	27	50.3	50.3	57.21	511	0	0.112926	0.249805	0	0.0813158	0.274561	2	0.998471	1.46027	0.281656	0.65852	FALSE	10.8048	0.00845731	0.0456638	TRUE	+				5061	;P48444(IPI00514053)	GO:0016020;GO:0005783;GO:0031410;GO:0030137;GO:0005737;GO:0000139;GO:0005829;GO:0030663;GO:0030126;GO:0030131;GO:0005794	1;1;1;1;1;1;1;1;1;1;1			GO:0015031;GO:0021691;GO:0006810;GO:0008344;GO:0048193;GO:0048205;GO:0006886;GO:0016044;GO:0016192;GO:0006890;GO:0043473	1;1;1;1;1;1;1;1;1;1;1	COPI-coated vesicle membrane;Golgi membrane;COPI-coated vesicle;COPI vesicle coat;Golgi apparatus;endoplasmic reticulum;clathrin adaptor complex;cytoplasm;cytosol;cytoplasmic vesicle;membrane	1;1;1;1;1;1;1;1;1;1;1			intracellular protein transport;cerebellar Purkinje cell layer maturation;cellular membrane organization;vesicle-mediated transport;transport;pigmentation;Golgi vesicle transport;COPI coating of Golgi vesicle;protein transport;adult locomotory behavior;retrograde vesicle-mediated transport, Golgi to ER	1;1;1;1;1;1;1;1;1;1;1	P48444
5180	IPI:IPI00556365.1	Cysteinyl-tRNA synthetase, cytoplasmic;Cysteine--tRNA ligase	CARS	Isoform 1 of Cysteinyl-tRNA synthetase, cytoplasmic;Isoform 2 of Cysteinyl-tRNA synthetase, cytoplasmic	P49589-1;P49589;P49589-2	SYCC_HUMAN	2	28	28	28	40.5	40.5	85.472	748	0	0.113824	0.230018	0	0.149711	0.240116	2	0.999982	3.93816	0.0588444	0.421426	FALSE	12.4535	0.00638616	0.0418066	TRUE	+				5180	;P49589(IPI00556365)	GO:0005737;GO:0005829	1;1	GO:0005524;GO:0016874;GO:0005515;GO:0000166;GO:0004817;GO:0000049;GO:0042803;GO:0046872;GO:0004812	1;1;1;1;1;1;1;1;1	GO:0006423;GO:0006418;GO:0006412;GO:0010467	1;1;1;1	cytoplasm;cytosol	1;1	ATP binding;cysteine-tRNA ligase activity;protein homodimerization activity;aminoacyl-tRNA ligase activity;tRNA binding;nucleotide binding;ligase activity;protein binding;metal ion binding	1;1;1;1;1;1;1;1;1	tRNA aminoacylation for protein translation;gene expression;translation;cysteinyl-tRNA aminoacylation	1;1;1;1	P49589
5231	IPI:IPI00642238.4	Heterochromatin protein 1-binding protein 3;Protein HP1-BP74	HP1BP3	Isoform 1 of Heterochromatin protein 1-binding protein 3;Isoform 2 of Heterochromatin protein 1-binding protein 3;Isoform 3 of Heterochromatin protein 1-binding protein 3	Q5SSJ5-1;Q5SSJ5;Q5SSJ5-2;Q5SSJ5-3	HP1B3_HUMAN	4	20	20	20	37.3	37.3	61.206	553	0	0.111732	0.243209	0	0.103238	0.251976	2	0.998903	6.3632	0.0238184	0.357252	FALSE	21.6242	0.00213172	0.0330512	TRUE	+				5231	;Q5SSJ5(IPI00642238)	GO:0000786;GO:0005634;GO:0005694	1;1;1	GO:0003677	1	GO:0006334	1	chromosome;nucleus;nucleosome	1;1;1	DNA binding	1	nucleosome assembly	1	Q5SSJ5
5258	IPI:IPI00644936.1	Guanine nucleotide-binding protein G(s) subunit alpha isoforms short;Adenylate cyclase-stimulating G alpha protein;Guanine nucleotide-binding protein G(s) subunit alpha isoforms XLas;Extra large alphas protein	GNAS;GNAS1;GSP	Isoform 3 of Guanine nucleotide-binding protein G(s) subunit alpha isoforms short;Isoform XLas-1 of Guanine nucleotide-binding protein G(s) subunit alpha isoforms XLas;Isoform XLas-2 of Guanine nucleotide-binding protein G(s) subunit alpha isoforms XLas;Is	P63092-3;P63092;Q5JWF2-1;Q5JWF2;Q5JWF2-2;P63092-1;P63092-2	GNAS2_HUMAN;GNAS1_HUMAN	6	16	15	15	43.8	40.9	44.179	379	0	0.0814061	0.262338	0	0.0765803	0.282789	2	0.976842	1.54044	0.263357	0.644014	FALSE	11.9423	0.00693881	0.0431561	TRUE	+				5258	;P63092(IPI00644936)	GO:0016020;GO:0005737;GO:0031224;GO:0032588;GO:0005886;GO:0005834	1;1;1;1;1;1	GO:0031683;GO:0004016;GO:0000166;GO:0004871;GO:0003924;GO:0046872;GO:0019001;GO:0005525	1;1;1;1;1;1;1;1	GO:0007596;GO:0050796;GO:0030819;GO:0043950;GO:0007165;GO:0006184;GO:0044281;GO:0007608;GO:0006171;GO:0046907;GO:0006112;GO:0071377;GO:0032320;GO:0071880;GO:0071380;GO:0006833;GO:0007191;GO:0007186;GO:0055085;GO:0071870;GO:0007190	1;1;1;1;1;1;1;1;1;1;1;1;1;1;1;1;1;1;1;1;1	intrinsic to membrane;plasma membrane;heterotrimeric G-protein complex;cytoplasm;membrane;trans-Golgi network membrane	1;1;1;1;1;1	guanyl nucleotide binding;adenylate cyclase activity;GTP binding;GTPase activity;nucleotide binding;signal transducer activity;G-protein beta/gamma-subunit complex binding;metal ion binding	1;1;1;1;1;1;1;1	adenylate cyclase-activating dopamine receptor signaling pathway;intracellular transport;energy reserve metabolic process;water transport;cellular response to catecholamine stimulus;GTP catabolic process;cellular response to glucagon stimulus;cellular response to prostaglandin E stimulus;small molecule metabolic process;adenylate cyclase-activating adrenergic receptor signaling pathway;G-protein …	1;1;1;1;1;1;1;1;1;1;1;1;1;1;1;1;1;1;1;1;1	P63092
5275	IPI:IPI00646304.4	Peptidyl-prolyl cis-trans isomerase B;Cyclophilin B;S-cyclophilin;CYP-S1	PPIB;CYPB	Peptidyl-prolyl cis-trans isomerase B	P23284	PPIB_HUMAN	1	18	18	18	67.6	67.6	23.742	216	0	0.178164	0.53145	0	0.183016	0.53131	2	0.98238	13.9313	0.00511297	0.309054	FALSE	27.9599	0.00127672	0.03031	TRUE	+				5275	;P23284(IPI00646304)	GO:0005788;GO:0005783;GO:0042470	1;1;1	GO:0003755;GO:0005515;GO:0016853;GO:0042277;GO:0051082	1;1;1;1;1	GO:0006457;GO:0030198;GO:0000413	1;1;1	melanosome;endoplasmic reticulum;endoplasmic reticulum lumen	1;1;1	peptidyl-prolyl cis-trans isomerase activity;unfolded protein binding;isomerase activity;peptide binding;protein binding	1;1;1;1;1	protein folding;protein peptidyl-prolyl isomerization;extracellular matrix organization	1;1;1	P23284
5354	IPI:IPI00744637.2	RUN and FYVE domain-containing protein 1;FYVE-finger protein EIP1;Zinc finger FYVE domain-containing protein 12;La-binding protein 1;Rab4-interacting protein	RUFY1;RABIP4;ZFYVE12	Isoform 1 of RUN and FYVE domain-containing protein 1;Isoform 2 of RUN and FYVE domain-containing protein 1	Q96T51-1;Q96T51;Q96T51-2	RUFY1_HUMAN	3	17	17	16	30.8	29.7	79.817	708	0	0.0536123	0.179865	0	0.0541939	0.17283	2	0.973877	1.50339	0.27162	0.64973	FALSE	18.2044	0.00300392	0.0347039	TRUE	+				5354	;Q96T51(IPI00744637)	GO:0016020;GO:0005737;GO:0005768;GO:0031901	1;1;1;1	GO:0008565;GO:0005515;GO:0008270;GO:0008289;GO:0046872	1;1;1;1;1	GO:0015031;GO:0006810;GO:0030100;GO:0006897	1;1;1;1	early endosome membrane;endosome;cytoplasm;membrane	1;1;1;1	lipid binding;protein transporter activity;protein binding;zinc ion binding;metal ion binding	1;1;1;1;1	transport;protein transport;regulation of endocytosis;endocytosis	1;1;1;1	Q96T51
5427	IPI:IPI00783862.2	Flavin reductase;NADPH-dependent diaphorase;NADPH-flavin reductase;Biliverdin reductase B;Biliverdin-IX beta-reductase;Green heme-binding protein	BLVRB;FLR	Flavin reductase	P30043	BLVRB_HUMAN	1	7	7	7	46.1	46.1	22.119	206	0	0.0818127	0.270078	0	0.0927288	0.274522	2	0.975071	3.12561	0.088919	0.477558	FALSE	58.8478	0.000288636	0.0194884	TRUE	+				5427	;P30043(IPI00783862)	GO:0005737;GO:0005730;GO:0005829;GO:0005886;GO:0005634	1;1;1;1;1	GO:0042602;GO:0016491;GO:0004074	1;1;1	GO:0055114;GO:0044281;GO:0042167;GO:0006778	1;1;1;1	nucleus;plasma membrane;cytoplasm;cytosol;nucleolus	1;1;1;1;1	biliverdin reductase activity;oxidoreductase activity;riboflavin reductase (NADPH) activity	1;1;1	porphyrin-containing compound metabolic process;oxidation-reduction process;heme catabolic process;small molecule metabolic process	1;1;1;1	P30043
5508	IPI:IPI00941534.1;IPI:IPI00816201.1	Septin-7;CDC10 protein homolog	SEPT7;CDC10	Isoform 1 of Septin-7;Isoform 2 of Septin-7	Q16181-1;Q16181;Q16181-2	SEPT7_HUMAN	3	22	22	22	48.4	48.4	50.808	438	0	0.0903282	0.198676	0	0.078996	0.197826	2	0.998632	2.50337	0.129328	0.531752	FALSE	30.6927	0.00105984	0.0294218	TRUE	+				5508	;Q16181(IPI00816201;IPI00941534)	GO:0005929;GO:0042995;GO:0016324;GO:0005938;GO:0005737;GO:0030496;GO:0035085;GO:0005730;GO:0015629;GO:0005819;GO:0000777;GO:0043679;GO:0045202;GO:0005886;GO:0005856;GO:0005634;GO:0015630;GO:0005694;GO:0000775;GO:0001725;GO:0031105;GO:0032154;GO:0000776	1;1;1;1;1;1;1;1;1;1;1;1;1;1;1;1;1;1;1;1;1;1;1	GO:0005515;GO:0000166;GO:0005198;GO:0005525	1;1;1;1	GO:0007067;GO:0060271;GO:0051291;GO:0051301;GO:0000910;GO:0016476;GO:0007049	1;1;1;1;1;1;1	cleavage furrow;cell cortex;chromosome, centromeric region;midbody;stress fiber;chromosome;nucleus;plasma membrane;cell projection;kinetochore;spindle;cilium axoneme;septin complex;apical plasma membrane;condensed chromosome kinetochore;cilium;actin cytoskeleton;cytoplasm;microtubule cytoskeleton;synapse;nucleolus;cytoskeleton;axon terminus	1;1;1;1;1;1;1;1;1;1;1;1;1;1;1;1;1;1;1;1;1;1;1	GTP binding;nucleotide binding;protein binding;structural molecule activity	1;1;1;1	cell division;protein heterooligomerization;mitosis;cytokinesis;cell cycle;regulation of embryonic cell shape;cilium morphogenesis	1;1;1;1;1;1;1	Q16181
5526	IPI:IPI00844000.1	UPF0555 protein KIAA0776	KIAA0776	UPF0555 protein KIAA0776	O94874	K0776_HUMAN	1	23	23	23	33.4	33.4	89.594	794	0	0.0682597	0.24638	0	0.091578	0.249861	2	0.968424	2.17859	0.161227	0.565592	FALSE	26.2852	0.00144423	0.031533	TRUE	+				5526	;O94874(IPI00844000)	GO:0005783;GO:0005737;GO:0005730;GO:0005634	1;1;1;1	GO:0016874;GO:0071568;GO:0005515	1;1;1	GO:0032088;GO:0071569;GO:0031397	1;1;1	nucleus;endoplasmic reticulum;cytoplasm;nucleolus	1;1;1;1	ligase activity;protein binding;UFM1 conjugating enzyme activity	1;1;1	protein ufmylation;negative regulation of NF-kappaB transcription factor activity;negative regulation of protein ubiquitination	1;1;1	O94874
5664	IPI:IPI00924819.1	Protein ARMET;Mesencephalic astrocyte-derived neurotrophic factor;Arginine-rich protein	ARMET;ARP	Mesencephalic astrocyte-derived neurotrophic factor	P55145	ARMET_HUMAN	1	9	9	9	47.5	47.5	20.256	179	0	0.334234	0.527827	0	0.334733	0.505036	2	0.988373	5.66965	0.0297288	0.357252	FALSE	11.4431	0.00755038	0.0442336	TRUE	+				5664	No_Reviewed_Info
5707	IPI:IPI00939879.1	AP-1 complex subunit gamma-1;Adapter-related protein complex 1 subunit gamma-1;Adaptor protein complex AP-1 subunit gamma-1;Golgi adaptor HA1/AP1 adaptin subunit gamma-1;Gamma1-adaptin;Clathrin assembly protein complex 1 gamma-1 large chain	AP1G1;ADTG;CLAPG1	AP-1 complex subunit gamma-1	O43747	AP1G1_HUMAN	1	15	15	15	22.6	22.6	91.35	822	0	0.104365	0.286573	0	0.0639317	0.293447	2	0.987925	1.57731	0.255448	0.639696	FALSE	17.6766	0.0031851	0.0347039	TRUE	+				5707	;O43747(IPI00939879)	GO:0016020;GO:0030119;GO:0031410;GO:0005737;GO:0000139;GO:0032588;GO:0005829;GO:0030665;GO:0055037;GO:0030659;GO:0005765;GO:0030136;GO:0030131;GO:0005802;GO:0048471;GO:0030117;GO:0005794	1;1;1;1;1;1;1;1;1;1;1;1;1;1;1;1;1	GO:0008565;GO:0005515;GO:0019894;GO:0005215	1;1;1;1	GO:0015031;GO:0050690;GO:0006810;GO:0019886;GO:0016032;GO:0006886;GO:0016044;GO:0016192;GO:0006897;GO:0006892	1;1;1;1;1;1;1;1;1;1	cytoplasmic vesicle membrane;clathrin-coated vesicle;recycling endosome;Golgi membrane;clathrin-coated vesicle membrane;membrane coat;Golgi apparatus;lysosomal membrane;perinuclear region of cytoplasm;clathrin adaptor complex;cytoplasm;trans-Golgi network;cytosol;cytoplasmic vesicle;membrane;trans-Golgi network membrane;AP-type membrane coat adaptor complex	1;1;1;1;1;1;1;1;1;1;1;1;1;1;1;1;1	transporter activity;kinesin binding;protein transporter activity;protein binding	1;1;1;1	intracellular protein transport;cellular membrane organization;viral process;vesicle-mediated transport;transport;post-Golgi vesicle-mediated transport;protein transport;antigen processing and presentation of exogenous peptide antigen via MHC class II;regulation of defense response to virus by virus;endocytosis	1;1;1;1;1;1;1;1;1;1	O43747
5755	IPI:IPI00941747.1	Calnexin;Major histocompatibility complex class I antigen-binding protein p88;p90;IP90	CANX	Calnexin	P27824	CALX_HUMAN	2	19	19	19	32.9	32.9	67.567	592	0	0.125228	0.246503	0	0.113065	0.242342	2	0.999957	4.61901	0.0438134	0.389599	FALSE	11.1055	0.00801087	0.0445522	TRUE	+				5755	;P27824(IPI00941747)	GO:0016020;GO:0005788;GO:0005840;GO:0005783;GO:0042470;GO:0005737;GO:0043025;GO:0016021;GO:0043197;GO:0030424;GO:0032839;GO:0071556;GO:0005789	1;1;1;1;1;1;1;1;1;1;1;1;1	GO:0034185;GO:0005515;GO:0035255;GO:0046872;GO:0005509;GO:0051082	1;1;1;1;1;1	GO:0006457;GO:0009306;GO:0007568;GO:0019886;GO:0043687;GO:0044267;GO:0072583;GO:0002474;GO:0048488;GO:0018279	1;1;1;1;1;1;1;1;1;1	neuronal cell body;ribosome;integral to lumenal side of endoplasmic reticulum membrane;dendritic spine;integral to membrane;endoplasmic reticulum membrane;melanosome;axon;endoplasmic reticulum;endoplasmic reticulum lumen;cytoplasm;dendrite cytoplasm;membrane	1;1;1;1;1;1;1;1;1;1;1;1;1	unfolded protein binding;apolipoprotein binding;protein binding;ionotropic glutamate receptor binding;calcium ion binding;metal ion binding	1;1;1;1;1;1	antigen processing and presentation of peptide antigen via MHC class I;synaptic vesicle endocytosis;aging;protein folding;cellular protein metabolic process;protein secretion;post-translational protein modification;clathrin-mediated endocytosis;antigen processing and presentation of exogenous peptide antigen via MHC class II;protein N-linked glycosylation via asparagine	1;1;1;1;1;1;1;1;1;1	P27824
5759	IPI:IPI00941900.1	Calumenin;Crocalbin;IEF SSP 9302	CALU	Isoform 1 of Calumenin	O43852-1;O43852	CALU_HUMAN	1	5	5	2	16.5	2.9	37.106	315	0	0.156958	0.287427	0	0.148641	0.279814	2	0.998587	5.90938	0.0274621	0.357252	FALSE	19.7482	0.00255435	0.0344775	TRUE	+				5759	;O43852(IPI00941900)	GO:0005788;GO:0005783;GO:0042470;GO:0016529;GO:0033018;GO:0005576;GO:0005794	1;1;1;1;1;1;1	GO:0005515;GO:0046872;GO:0005509	1;1;1	GO:0007596;GO:0008150;GO:0030168;GO:0002576	1;1;1;1	sarcoplasmic reticulum;sarcoplasmic reticulum lumen;melanosome;Golgi apparatus;endoplasmic reticulum;endoplasmic reticulum lumen;extracellular region	1;1;1;1;1;1;1	protein binding;calcium ion binding;metal ion binding	1;1;1	platelet degranulation;platelet activation;biological_process;blood coagulation	1;1;1;1	O43852
5770	IPI:IPI00942431.1	Epidermal growth factor receptor substrate 15-like 1;Eps15-related protein	EPS15L1;EPS15R	Epidermal growth factor receptor substrate 15-like 1	Q9UBC2	EP15R_HUMAN	1	15	15	15	22	22	94.254	864	0	0.100534	0.297504	0	0.12954	0.298919	2	0.982935	2.57457	0.123525	0.529806	FALSE	11.4885	0.00749156	0.0440911	TRUE	+				5770	;Q9UBC2(IPI00942431)	GO:0016020;GO:0005886;GO:0005634;GO:0005905	1;1;1;1	GO:0046872;GO:0005509	1;1	GO:0007173;GO:0042059;GO:0006897	1;1;1	nucleus;plasma membrane;coated pit;membrane	1;1;1;1	calcium ion binding;metal ion binding	1;1	negative regulation of epidermal growth factor receptor signaling pathway;epidermal growth factor receptor signaling pathway;endocytosis	1;1;1	Q9UBC2
934	IPI:IPI00011217.3	NADH dehydrogenase [ubiquinone] iron-sulfur protein 4, mitochondrial;NADH-ubiquinone oxidoreductase 18 kDa subunit;Complex I-18 kDa;Complex I-AQDQ	NDUFS4	NADH dehydrogenase [ubiquinone] iron-sulfur protein 4, mitochondrial	O43181	NDUS4_HUMAN	1	3	3	3	20.6	20.6	20.108	175	0	0.153867	0.199968	0	0.127876	0.199675	3	0.97547	4.20081	0.0522647	0.405509	FALSE	19.5636	0.00260258	0.0344775	TRUE	+				934	;O43181(IPI00011217)	GO:0016020;GO:0045271;GO:0005747;GO:0005739;GO:0005743;GO:0070469	1;1;1;1;1;1	GO:0016651;GO:0008137	1;1	GO:0007420;GO:0044237;GO:0048146;GO:0019933;GO:0044281;GO:0006120;GO:0051591;GO:0022900;GO:0022904;GO:0032981;GO:0072593;GO:0001932;GO:0045333	1;1;1;1;1;1;1;1;1;1;1;1;1	mitochondrion;mitochondrial inner membrane;respiratory chain;mitochondrial respiratory chain complex I;respiratory chain complex I;membrane	1;1;1;1;1;1	oxidoreductase activity, acting on NAD(P)H;NADH dehydrogenase (ubiquinone) activity	1;1	positive regulation of fibroblast proliferation;cAMP-mediated signaling;small molecule metabolic process;mitochondrial respiratory chain complex I assembly;respiratory electron transport chain;reactive oxygen species metabolic process;electron transport chain;response to cAMP;mitochondrial electron transport, NADH to ubiquinone;cellular metabolic process;regulation of protein phosphorylation;cell…	1;1;1;1;1;1;1;1;1;1;1;1;1	O43181
2034	IPI:IPI00027194.1	Syntaxin-18;Cell growth-inhibiting gene 9 protein	STX18;GIG9	Syntaxin-18	Q9P2W9	STX18_HUMAN	1	8	8	8	25.1	25.1	38.673	335	0	0.118091	0.127995	0	0.102255	0.130045	3	0.997579	1.47503	0.278168	0.656725	FALSE	14.5978	0.00465997	0.0374517	TRUE	+				2034	;Q9P2W9(IPI00027194)	GO:0016020;GO:0005783;GO:0000139;GO:0016021;GO:0005794;GO:0005789	1;1;1;1;1;1	GO:0005484;GO:0005515	1;1	GO:0015031;GO:0006810;GO:0006886;GO:0016192;GO:0006888	1;1;1;1;1	Golgi membrane;integral to membrane;endoplasmic reticulum membrane;Golgi apparatus;endoplasmic reticulum;membrane	1;1;1;1;1;1	SNAP receptor activity;protein binding	1;1	intracellular protein transport;vesicle-mediated transport;ER to Golgi vesicle-mediated transport;transport;protein transport	1;1;1;1;1	Q9P2W9
2207	IPI:IPI00029744.1	Single-stranded DNA-binding protein, mitochondrial;PWP1-interacting protein 17	SSBP1;SSBP	Single-stranded DNA-binding protein, mitochondrial	Q04837	SSBP_HUMAN	1	8	8	8	50.7	50.7	17.259	148	0	0.0946344	0.114863	0	0.0726375	0.113615	3	0.986301	2.0782	0.173265	0.57544	FALSE	40.3164	0.000614663	0.0255211	TRUE	+				2207	;Q04837(IPI00029744)	GO:0042645;GO:0005739	1;1	GO:0003677;GO:0003697;GO:0005515;GO:0003682	1;1;1;1	GO:0051096;GO:0006260;GO:0070584	1;1;1	mitochondrion;mitochondrial nucleoid	1;1	DNA binding;single-stranded DNA binding;chromatin binding;protein binding	1;1;1;1	mitochondrion morphogenesis;positive regulation of helicase activity;DNA replication	1;1;1	Q04837
4394	IPI:IPI00335280.3;IPI:IPI00373788.1	Ribulose-phosphate 3-epimerase;Ribulose-5-phosphate-3-epimerase	RPE;HUSSY-17	Isoform 1 of Ribulose-phosphate 3-epimerase;Isoform 2 of Ribulose-phosphate 3-epimerase	Q96AT9-1;Q96AT9;Q96AT9-2	RPE_HUMAN	2	2	2	2	11.4	11.4	24.927	228	0	0.124949	0.161774	0	0.0981532	0.169803	3	0.976139	3.64399	0.0677453	0.429023	FALSE	19.1376	0.00271927	0.0347039	TRUE	+				4394	;Q96AT9(IPI00335280;IPI00373788)	GO:0005829;GO:0043231	1;1	GO:0016857;GO:0048029;GO:0016853;GO:0042802;GO:0003824;GO:0042803;GO:0046872;GO:0030246;GO:0004750	1;1;1;1;1;1;1;1;1	GO:0008152;GO:0006098;GO:0044281;GO:0009052;GO:0005975	1;1;1;1;1	intracellular membrane-bounded organelle;cytosol	1;1	carbohydrate binding;ribulose-phosphate 3-epimerase activity;catalytic activity;monosaccharide binding;protein homodimerization activity;identical protein binding;isomerase activity;racemase and epimerase activity, acting on carbohydrates and derivatives;metal ion binding	1;1;1;1;1;1;1;1;1	pentose-phosphate shunt, non-oxidative branch;small molecule metabolic process;pentose-phosphate shunt;metabolic process;carbohydrate metabolic process	1;1;1;1;1	Q96AT9
4443	IPI:IPI00375676.8	Ferritin light chain	FTL	Ferritin light chain	P02792	FRIL_HUMAN	1	5	5	5	32.6	32.6	20.019	175	0	0.60038	0.558708	0	0.583592	0.58446	3	0.998067	4.65493	0.0431829	0.386305	FALSE	13.5843	0.0053754	0.0384265	TRUE	+				4443	No_Reviewed_Info
4986	IPI:IPI00470779.2	Alpha-taxilin	TXLNA;TXLN	Alpha-taxilin	P40222	TXLNA_HUMAN	1	15	15	15	21.4	21.4	61.89	546	0	0.22175	0.274152	0	0.135977	0.28783	3	0.98366	1.33885	0.312507	0.683226	FALSE	12.7381	0.00610658	0.0409917	TRUE	+				4986	;P40222(IPI00470779)	GO:0005737;GO:0005576	1;1	GO:0005515;GO:0030372;GO:0005125;GO:0019905	1;1;1;1	GO:0042113;GO:0008283;GO:0006887	1;1;1	cytoplasm;extracellular region	1;1	high molecular weight B cell growth factor receptor binding;protein binding;cytokine activity;syntaxin binding	1;1;1;1	B cell activation;cell proliferation;exocytosis	1;1;1	P40222
5124	IPI:IPI00550821.2;IPI:IPI00719106.1	Cleavage and polyadenylation specificity factor subunit 7;Cleavage and polyadenylation specificity factor 59 kDa subunit;Pre-mRNA cleavage factor Im 59 kDa subunit	CPSF7	Isoform 1 of Cleavage and polyadenylation specificity factor subunit 7;Isoform 2 of Cleavage and polyadenylation specificity factor subunit 7	Q8N684-1;Q8N684;Q8N684-2	CPSF7_HUMAN	2	11	11	11	32.3	32.3	52.049	471	0	0.080848	0.0873283	0	0.0712797	0.0912214	3	0.99778	3.46896	0.0739949	0.438653	FALSE	15.598	0.00408504	0.036204	TRUE	+				5124	;Q8N684(IPI00550821;IPI00719106)	GO:0005849;GO:0005634;GO:0005654	1;1;1	GO:0003723;GO:0005515;GO:0000166;GO:0003676	1;1;1;1	GO:0051262;GO:0006397;GO:0031124;GO:0000398;GO:0008380;GO:0006369;GO:0006366;GO:0010467	1;1;1;1;1;1;1;1	nucleoplasm;nucleus;mRNA cleavage factor complex	1;1;1	RNA binding;nucleotide binding;protein binding;nucleic acid binding	1;1;1;1	transcription from RNA polymerase II promoter;termination of RNA polymerase II transcription;RNA splicing;protein tetramerization;gene expression;mRNA processing;mRNA 3'-end processing;mRNA splicing, via spliceosome	1;1;1;1;1;1;1;1	Q8N684
5196	IPI:IPI00607591.3	Rap1 GTPase-GDP dissociation stimulator 1;SMG GDS protein;SMG P21 stimulatory GDP/GTP exchange protein;Exchange factor smgGDS	RAP1GDS1	Isoform 1 of Rap1 GTPase-GDP dissociation stimulator 1;Isoform 2 of Rap1 GTPase-GDP dissociation stimulator 1	P52306-1;P52306;P52306-2	GDS1_HUMAN	2	26	26	26	48.8	48.8	66.316	607	0	0.0548522	0.0676536	0	0.0629295	0.0706616	3	0.984013	4.42302	0.0475039	0.395643	FALSE	11.5914	0.00736065	0.0438041	TRUE	+				5196	;P52306(IPI00607591)	GO:0005575	1	GO:0005096	1	GO:0008150;GO:0043547	1;1	cellular_component	1	GTPase activator activity	1	positive regulation of GTPase activity;biological_process	1;1	P52306
5374	IPI:IPI00746352.1	SH3 domain-binding glutamic acid-rich-like protein 3;SH3 domain-binding protein 1	SH3BGRL3;P1725	SH3 domain-binding glutamic acid-rich-like protein 3	Q9H299	SH3L3_HUMAN	1	2	2	2	21.5	21.5	10.438	93	0	0.206925	0.21558	0	0.135102	0.214054	3	0.999371	1.65745	0.239281	0.625586	FALSE	87.5676	0.000130385	0.0188189	TRUE	+				5374	;Q9H299(IPI00746352)	GO:0005737;GO:0005634	1;1	GO:0015035;GO:0009055	1;1	GO:0045454	1	nucleus;cytoplasm	1;1	electron carrier activity;protein disulfide oxidoreductase activity	1;1	cell redox homeostasis	1	Q9H299
4889	IPI:IPI00454969.4;IPI:IPI00941211.1	PHD finger protein 14	PHF14;KIAA0783	Isoform 1 of PHD finger protein 14;Isoform 2 of PHD finger protein 14	O94880-1;O94880;O94880-2	PHF14_HUMAN	2	6	6	6	8.6	8.6	100.05	888	0	0.112612	-0.0392791	0	0.071842	-0.0376657	4	0.968477	1.21711	0.347688	0.705052	FALSE	-21.1963	0.00221837	0.0330512	TRUE	+				4889	;O94880(IPI00941211)			GO:0008270;GO:0046872	1;1					zinc ion binding;metal ion binding	1;1			O94880
340	IPI:IPI00003985.1	Mitochondrial chaperone BCS1;BCS1-like protein;H-BCS1	BCS1L;BCS1	Mitochondrial chaperone BCS1	Q9Y276	BCS1_HUMAN	1	8	8	8	24.1	24.1	47.534	419	0	0.0544334	-0.138781	0	0.0634437	-0.138611	5	0.969675	4.56102	0.0448602	0.395094	FALSE	-236.038	1.79484e-05	0.0130872	TRUE	+				340	;Q9Y276(IPI00003985)	GO:0016020;GO:0016021;GO:0005739;GO:0005750;GO:0005743	1;1;1;1;1	GO:0005524;GO:0005515;GO:0000166;GO:0017111	1;1;1;1	GO:0034551;GO:0007005;GO:0033617;GO:0032981	1;1;1;1	mitochondrion;mitochondrial inner membrane;integral to membrane;mitochondrial respiratory chain complex III;membrane	1;1;1;1;1	ATP binding;nucleoside-triphosphatase activity;nucleotide binding;protein binding	1;1;1;1	mitochondrial respiratory chain complex I assembly;mitochondrion organization;mitochondrial respiratory chain complex III assembly;mitochondrial respiratory chain complex IV assembly	1;1;1;1	Q9Y276
1406	IPI:IPI00018140.3;IPI:IPI00402182.2;IPI:IPI00402183.2;IPI:IPI00402184.4	Heterogeneous nuclear ribonucleoprotein Q;Synaptotagmin-binding, cytoplasmic RNA-interacting protein;Glycine- and tyrosine-rich RNA-binding protein;GRY-RBP;NS1-associated protein 1	SYNCRIP;HNRPQ;NSAP1	Isoform 1 of Heterogeneous nuclear ribonucleoprotein Q;Isoform 2 of Heterogeneous nuclear ribonucleoprotein Q;Isoform 3 of Heterogeneous nuclear ribonucleoprotein Q;Isoform 4 of Heterogeneous nuclear ribonucleoprotein Q;synaptotagmin binding, cytoplasmic R	O60506-1;O60506;O60506-2;O60506-3;O60506-4;O60506-5	HNRPQ_HUMAN	5	24	17	17	37.1	28.9	69.602	623	0	0.0581751	-0.100544	0	0.0438625	-0.104261	5	0.988331	1.34446	0.310993	0.6831	FALSE	-11.8408	0.00705698	0.0432984	TRUE	+				1406	;O60506(IPI00402184;IPI00402183;IPI00402182;IPI00018140)	GO:0005783;GO:0070937;GO:0005737;GO:0071204;GO:0005681;GO:0043231;GO:0005634;GO:0005654;GO:0071013;GO:0030529	1;1;1;1;1;1;1;1;1;1	GO:0008143;GO:0003723;GO:0005515;GO:0000166;GO:0003676	1;1;1;1;1	GO:0071346;GO:0006396;GO:0006397;GO:0017148;GO:0000398;GO:0070934;GO:0008380;GO:0006417;GO:0019048	1;1;1;1;1;1;1;1;1	nucleoplasm;histone pre-mRNA 3'end processing complex;catalytic step 2 spliceosome;nucleus;intracellular membrane-bounded organelle;ribonucleoprotein complex;endoplasmic reticulum;spliceosomal complex;cytoplasm;CRD-mediated mRNA stability complex	1;1;1;1;1;1;1;1;1;1	RNA binding;poly(A) RNA binding;nucleotide binding;protein binding;nucleic acid binding	1;1;1;1;1	negative regulation of translation;RNA splicing;regulation of translation;mRNA processing;cellular response to interferon-gamma;RNA processing;modulation by virus of host morphology or physiology;CRD-mediated mRNA stabilization;mRNA splicing, via spliceosome	1;1;1;1;1;1;1;1;1	O60506
1428	IPI:IPI00018350.3	DNA replication licensing factor MCM5;CDC46 homolog;P1-CDC46	MCM5;CDC46	DNA replication licensing factor MCM5	P33992	MCM5_HUMAN	1	39	39	39	58.3	58.3	82.285	734	0	0.0672337	-0.176187	0	0.0458264	-0.175587	5	0.968194	1.21605	0.348015	0.705052	FALSE	-14.7798	0.00454666	0.0373904	TRUE	+				1428	;P33992(IPI00018350)	GO:0042555;GO:0005634;GO:0005654	1;1;1	GO:0003677;GO:0005524;GO:0004386;GO:0005515;GO:0016787;GO:0000166;GO:0003678	1;1;1;1;1;1;1	GO:0000278;GO:0006271;GO:0006260;GO:0006270;GO:0000082;GO:0032508;GO:0007049	1;1;1;1;1;1;1	nucleoplasm;nucleus;MCM complex	1;1;1	DNA binding;ATP binding;DNA helicase activity;hydrolase activity;helicase activity;nucleotide binding;protein binding	1;1;1;1;1;1;1	mitotic cell cycle;DNA duplex unwinding;DNA replication initiation;cell cycle;DNA replication;G1/S transition of mitotic cell cycle;DNA strand elongation involved in DNA replication	1;1;1;1;1;1;1	P33992
3350	IPI:IPI00217413.3	ATP-dependent RNA helicase DHX29;DEAH box protein 29;Nucleic acid helicase DDXx	DHX29;DDX29	ATP-dependent RNA helicase DHX29	Q7Z478	DHX29_HUMAN	2	6	6	6	4.8	4.8	155.23	1369	0	0.120601	-0.154814	0	0.0775384	-0.157692	5	0.997438	0.605214	0.606563	0.844296	FALSE	-10.0193	0.00981515	0.049092	TRUE	+				3350	;Q7Z478(IPI00217413)	GO:0005737;GO:0005739;GO:0016282	1;1;1	GO:0005524;GO:0004386;GO:0008026;GO:0003743;GO:0016787;GO:0000166;GO:0043024;GO:0003676	1;1;1;1;1;1;1;1	GO:0006413;GO:0006412	1;1	mitochondrion;cytoplasm;eukaryotic 43S preinitiation complex	1;1;1	ribosomal small subunit binding;translation initiation factor activity;ATP binding;hydrolase activity;helicase activity;nucleotide binding;nucleic acid binding;ATP-dependent helicase activity	1;1;1;1;1;1;1;1	translational initiation;translation	1;1	Q7Z478
3639	IPI:IPI00247583.5	60S ribosomal protein L21	RPL21	60S ribosomal protein L21	P46778	RL21_HUMAN	1	9	9	9	45	45	18.565	160	0	0.0410356	-0.0577611	0	0.0265372	-0.062181	5	0.995257	1.31192	0.319905	0.68357	FALSE	-12.7872	0.00606022	0.0409917	TRUE	+				3639	;P46778(IPI00247583)	GO:0005840;GO:0022625;GO:0005829;GO:0005622;GO:0030529	1;1;1;1;1	GO:0003723;GO:0003735	1;1	GO:0000184;GO:0006413;GO:0006412;GO:0016070;GO:0006415;GO:0019083;GO:0016071;GO:0019058;GO:0044267;GO:0016032;GO:0006614;GO:0006414;GO:0010467	1;1;1;1;1;1;1;1;1;1;1;1;1	ribosome;ribonucleoprotein complex;cytosolic large ribosomal subunit;intracellular;cytosol	1;1;1;1;1	structural constituent of ribosome;RNA binding	1;1	viral infectious cycle;viral transcription;viral process;translational termination;RNA metabolic process;translational elongation;cellular protein metabolic process;translational initiation;mRNA metabolic process;nuclear-transcribed mRNA catabolic process, nonsense-mediated decay;gene expression;translation;SRP-dependent cotranslational protein targeting to membrane	1;1;1;1;1;1;1;1;1;1;1;1;1	P46778
4018	IPI:IPI00299904.3	DNA replication licensing factor MCM7;CDC47 homolog;P1.1-MCM3	MCM7;CDC47;MCM2	Isoform 1 of DNA replication licensing factor MCM7	P33993-1;P33993	MCM7_HUMAN	2	44	44	44	61.9	61.9	81.307	719	0	0.0649038	-0.169458	0	0.0464179	-0.166788	5	0.968393	0.768828	0.522374	0.798483	FALSE	-13.2345	0.00566092	0.0394443	TRUE	+				4018	;P33993(IPI00299904)	GO:0042555;GO:0005829;GO:0005654;GO:0005634;GO:0000785	1;1;1;1;1	GO:0003677;GO:0005524;GO:0004386;GO:0003697;GO:0005515;GO:0016787;GO:0000166;GO:0017111;GO:0004003;GO:0003678	1;1;1;1;1;1;1;1;1;1	GO:0006268;GO:0042325;GO:0000278;GO:0071364;GO:0006271;GO:0006260;GO:0071310;GO:0042493;GO:0006270;GO:0000082;GO:0008283;GO:0006974;GO:0007049	1;1;1;1;1;1;1;1;1;1;1;1;1	nucleoplasm;chromatin;nucleus;cytosol;MCM complex	1;1;1;1;1	DNA binding;ATP binding;ATP-dependent DNA helicase activity;DNA helicase activity;hydrolase activity;nucleoside-triphosphatase activity;single-stranded DNA binding;helicase activity;nucleotide binding;protein binding	1;1;1;1;1;1;1;1;1;1	mitotic cell cycle;regulation of phosphorylation;cellular response to epidermal growth factor stimulus;cellular response to organic substance;response to drug;DNA replication initiation;response to DNA damage stimulus;cell proliferation;cell cycle;DNA unwinding involved in DNA replication;DNA replication;G1/S transition of mitotic cell cycle;DNA strand elongation involved in DNA replication	1;1;1;1;1;1;1;1;1;1;1;1;1	P33993
4077	IPI:IPI00302176.5;IPI:IPI00607820.1	H/ACA ribonucleoprotein complex subunit 1;snoRNP protein GAR1;Nucleolar protein family A member 1	GAR1;NOLA1	Isoform 1 of H/ACA ribonucleoprotein complex subunit 1;Isoform 2 of H/ACA ribonucleoprotein complex subunit 1	Q9NY12-1;Q9NY12;Q9NY12-2	GAR1_HUMAN	2	9	9	9	33.2	33.2	22.348	217	0	0.0455617	-0.11636	0	0.0694557	-0.118398	5	0.969584	2.4528	0.133682	0.540185	FALSE	-17.097	0.00340358	0.0347039	TRUE	+				4077	;Q9NY12(IPI00607820;IPI00302176)	GO:0031429;GO:0005730;GO:0015030;GO:0005634;GO:0030529	1;1;1;1;1	GO:0003723;GO:0005261	1;1	GO:0006364;GO:0042254;GO:0001522	1;1;1	box H/ACA snoRNP complex;nucleus;ribonucleoprotein complex;Cajal body;nucleolus	1;1;1;1;1	RNA binding;cation channel activity	1;1	ribosome biogenesis;pseudouridine synthesis;rRNA processing	1;1;1	Q9NY12
4455	IPI:IPI00376199.4	Interferon regulatory factor 2-binding protein 2	IRF2BP2	Isoform 1 of Interferon regulatory factor 2-binding protein 2;Isoform 2 of Interferon regulatory factor 2-binding protein 2	Q7Z5L9-1;Q7Z5L9;Q7Z5L9-2	I2BP2_HUMAN	3	14	14	12	42.4	38	61.024	587	0	0.164403	-0.40956	0	0.128718	-0.450528	5	0.970913	1.84624	0.206137	0.603899	FALSE	-10.5497	0.0088657	0.0468152	TRUE	+				4455	;Q7Z5L9(IPI00376199)	GO:0005737;GO:0005634	1;1	GO:0046872	1	GO:0006351;GO:0006355	1;1	nucleus;cytoplasm	1;1	metal ion binding	1	transcription, DNA-dependent;regulation of transcription, DNA-dependent	1;1	Q7Z5L9
4972	IPI:IPI00470528.5	60S ribosomal protein L15	RPL15;EC45;TCBAP0781	60S ribosomal protein L15	P61313	RL15_HUMAN	1	9	9	9	41.7	41.7	24.146	204	0	0.106397	-0.10663	0	0.0756178	-0.112839	5	1	2.2357	0.154886	0.558621	FALSE	-14.0802	0.00500625	0.0379225	TRUE	+				4972	;P61313(IPI00470528)	GO:0005840;GO:0022625;GO:0005829;GO:0005622;GO:0030529	1;1;1;1;1	GO:0003723;GO:0005515;GO:0003735	1;1;1	GO:0000184;GO:0006413;GO:0006412;GO:0016070;GO:0006415;GO:0019083;GO:0016071;GO:0019058;GO:0044267;GO:0016032;GO:0006614;GO:0006414;GO:0010467	1;1;1;1;1;1;1;1;1;1;1;1;1	ribosome;ribonucleoprotein complex;cytosolic large ribosomal subunit;intracellular;cytosol	1;1;1;1;1	structural constituent of ribosome;RNA binding;protein binding	1;1;1	viral infectious cycle;viral transcription;viral process;translational termination;RNA metabolic process;translational elongation;cellular protein metabolic process;translational initiation;mRNA metabolic process;nuclear-transcribed mRNA catabolic process, nonsense-mediated decay;gene expression;translation;SRP-dependent cotranslational protein targeting to membrane	1;1;1;1;1;1;1;1;1;1;1;1;1	P61313
5158	IPI:IPI00554613.1	Heterogeneous nuclear ribonucleoprotein L-like;Stromal RNA-regulating factor	HNRPLL;SRRF;BLOCK24	Isoform 2 of Heterogeneous nuclear ribonucleoprotein L-like;Isoform 3 of Heterogeneous nuclear ribonucleoprotein L-like	Q8WVV9-2;Q8WVV9;Q8WVV9-3	HNRLL_HUMAN	2	5	1	1	23	2.5	31.232	282	0	0.0407807	-0.0999983	0	0.0651896	-0.0979218	5	0.971754	1.79223	0.214967	0.610592	FALSE	-9.94067	0.00996867	0.0495466	TRUE	+				5158	;Q8WVV9(IPI00554613)	GO:0005634;GO:0030529	1;1	GO:0003723;GO:0005515;GO:0000166;GO:0003729;GO:0003676	1;1;1;1;1	GO:0006397;GO:0033120	1;1	nucleus;ribonucleoprotein complex	1;1	mRNA binding;RNA binding;nucleotide binding;protein binding;nucleic acid binding	1;1;1;1;1	mRNA processing;positive regulation of RNA splicing	1;1	Q8WVV9
83	IPI:IPI00000005.1	GTPase NRas;Transforming protein N-Ras	NRAS;HRAS1	GTPase NRas	P01111	RASN_HUMAN	1	6	6	2	32.3	12.7	21.229	189	0	0.0502052	0.631695	0	0.0518938	0.589581	6	0.997441	1.83679	0.207647	0.604083	FALSE	10.0531	0.00975023	0.0490375	TRUE	+				83	;P01111(IPI00000005)	GO:0016020;GO:0000139;GO:0005886;GO:0005794	1;1;1;1	GO:0000166;GO:0003924;GO:0005525	1;1;1	GO:0007596;GO:0008286;GO:0048011;GO:0008543;GO:0032228;GO:0000186;GO:0030036;GO:0007165;GO:0006184;GO:0007264;GO:0000165;GO:0050900;GO:0048169;GO:0007265;GO:0035022;GO:0007173;GO:0007411;GO:0045087;GO:0043524;GO:0008542;GO:0051146;GO:0038095;GO:0008284	1;1;1;1;1;1;1;1;1;1;1;1;1;1;1;1;1;1;1;1;1;1;1	Golgi membrane;plasma membrane;Golgi apparatus;membrane	1;1;1;1	GTP binding;GTPase activity;nucleotide binding	1;1;1	Ras protein signal transduction;Fc-epsilon receptor signaling pathway;GTP catabolic process;regulation of long-term neuronal synaptic plasticity;neurotrophin TRK receptor signaling pathway;actin cytoskeleton organization;activation of MAPKK activity;visual learning;axon guidance;innate immune response;signal transduction;positive regulation of Rac protein signal transduction;leukocyte migration;M…	1;1;1;1;1;1;1;1;1;1;1;1;1;1;1;1;1;1;1;1;1;1;1	P01111
126	IPI:IPI00000783.1;IPI:IPI00215824.1	Proteasome subunit beta type-8;Proteasome subunit beta-5i;Proteasome component C13;Macropain subunit C13;Multicatalytic endopeptidase complex subunit C13	PSMB8;LMP7;RING10;Y2	Isoform 1 of Proteasome subunit beta type-8;Isoform 2 of Proteasome subunit beta type-8	P28062-1;P28062;P28062-2	PSB8_HUMAN	2	8	8	8	34.8	34.8	30.354	276	0	-0.00698519	0.297977	0	0.0240714	0.300838	6	0.999799	0.525307	0.651797	0.870612	FALSE	42.2077	0.000560855	0.023943	TRUE	+				126	;P28062(IPI00000783;IPI00215824)	GO:0000502;GO:1990111;GO:0005737;GO:0005829;GO:0005634;GO:0005654;GO:0005839	1;1;1;1;1;1;1	GO:0008233;GO:0005515;GO:0016787;GO:0004175;GO:0004298	1;1;1;1;1	GO:0060337;GO:0051603;GO:0000209;GO:0030154;GO:0043066;GO:0016032;GO:0006915;GO:0042590;GO:0006508;GO:0034641;GO:0002479;GO:0000082;GO:0019221;GO:0051439;GO:0000278;GO:0006521;GO:0044281;GO:0002474;GO:0051437;GO:0016070;GO:0019882;GO:0010467;GO:0051436;GO:0045444;GO:0031145;GO:0019048;GO:0016071;GO:0006977;GO:0042981	1;1;1;1;1;1;1;1;1;1;1;1;1;1;1;1;1;1;1;1;1;1;1;1;1;1;1;1;1	proteasome core complex;nucleoplasm;proteasome complex;nucleus;cytoplasm;cytosol;spermatoproteasome complex	1;1;1;1;1;1;1	endopeptidase activity;peptidase activity;hydrolase activity;threonine-type endopeptidase activity;protein binding	1;1;1;1;1	negative regulation of apoptotic process;cell differentiation;fat cell differentiation;antigen processing and presentation of peptide antigen via MHC class I;mitotic cell cycle;anaphase-promoting complex-dependent proteasomal ubiquitin-dependent protein catabolic process;DNA damage response, signal transduction by p53 class mediator resulting in cell cycle arrest;mRNA metabolic process;proteolysi…	1;1;1;1;1;1;1;1;1;1;1;1;1;1;1;1;1;1;1;1;1;1;1;1;1;1;1;1;1	P28062
129	IPI:IPI00000792.1	Quinone oxidoreductase;NADPH:quinone reductase;Zeta-crystallin	CRYZ	Quinone oxidoreductase	Q08257	QOR_HUMAN	1	17	17	17	63.2	63.2	35.206	329	0	0.00602003	0.465983	0	0.0183021	0.447677	6	0.999937	0.624935	0.595809	0.840243	FALSE	22.2592	0.00201218	0.0330512	TRUE	+				129	;Q08257(IPI00000792)	GO:0005737;GO:0005829;GO:0043231;GO:0005794	1;1;1;1	GO:0003723;GO:0003730;GO:0070402;GO:0008270;GO:0070404;GO:0016491;GO:0003960	1;1;1;1;1;1;1	GO:0007601;GO:0051289;GO:0055114;GO:0042178	1;1;1;1	intracellular membrane-bounded organelle;Golgi apparatus;cytoplasm;cytosol	1;1;1;1	NADH binding;mRNA 3'-UTR binding;NADPH binding;oxidoreductase activity;RNA binding;NADPH:quinone reductase activity;zinc ion binding	1;1;1;1;1;1;1	oxidation-reduction process;protein homotetramerization;visual perception;xenobiotic catabolic process	1;1;1;1	Q08257
135	IPI:IPI00000861.1	LIM and SH3 domain protein 1;MLN 50	LASP1;MLN50	Isoform 1 of LIM and SH3 domain protein 1;Isoform 2 of LIM and SH3 domain protein 1	Q14847-1;Q14847;Q14847-2	LASP1_HUMAN	2	7	7	7	32.6	32.6	29.717	261	0	0.0971673	0.390541	0	0.113754	0.379617	6	0.971031	5.13816	0.0358532	0.372441	FALSE	16.2908	0.00374686	0.0353912	TRUE	+				135	;Q14847(IPI00000861)	GO:0005938;GO:0005737;GO:0030864;GO:0005856;GO:0005925	1;1;1;1;1	GO:0051015;GO:0015075;GO:0005515;GO:0008270;GO:0005070;GO:0003779;GO:0046872	1;1;1;1;1;1;1	GO:0006810;GO:0034220;GO:0006811	1;1;1	cell cortex;focal adhesion;cortical actin cytoskeleton;cytoplasm;cytoskeleton	1;1;1;1;1	SH3/SH2 adaptor activity;ion transmembrane transporter activity;actin binding;protein binding;actin filament binding;zinc ion binding;metal ion binding	1;1;1;1;1;1;1	transport;ion transport;ion transmembrane transport	1;1;1	Q14847
147	IPI:IPI00001146.1	U6 snRNA-associated Sm-like protein LSm6	LSM6	U6 snRNA-associated Sm-like protein LSm6	P62312	LSM6_HUMAN	1	5	5	5	67.5	67.5	9.1275	80	0	0.0379057	0.161541	0	0.0294501	0.161148	6	0.974507	1.54971	0.261339	0.64253	FALSE	10.5038	0.00894241	0.0471382	TRUE	+				147	;P62312(IPI00001146)	GO:0005737;GO:0005681;GO:0005829;GO:0005634;GO:0030529;GO:0030532	1;1;1;1;1;1	GO:0003723;GO:0005515	1;1	GO:0006364;GO:0043928;GO:0016070;GO:0006397;GO:0000288;GO:0008033;GO:0016071;GO:0008380;GO:0010467	1;1;1;1;1;1;1;1;1	nucleus;small nuclear ribonucleoprotein complex;ribonucleoprotein complex;spliceosomal complex;cytoplasm;cytosol	1;1;1;1;1;1	RNA binding;protein binding	1;1	tRNA processing;RNA metabolic process;RNA splicing;mRNA metabolic process;gene expression;rRNA processing;mRNA processing;nuclear-transcribed mRNA catabolic process, deadenylation-dependent decay;exonucleolytic nuclear-transcribed mRNA catabolic process involved in deadenylation-dependent decay	1;1;1;1;1;1;1;1;1	P62312
197	IPI:IPI00002214.1	Importin subunit alpha-2;Karyopherin subunit alpha-2;SRP1-alpha;RAG cohort protein 1	KPNA2;RCH1;SRP1	Importin subunit alpha-2	P52292	IMA2_HUMAN	2	20	20	20	48.8	48.8	57.861	529	0	-0.153732	0.454145	0	-0.196882	0.473855	6	0.969978	-3.01783	0.0944957	0.487243	FALSE	23.7419	0.00176936	0.0330512	TRUE	+				197	;P52292(IPI00002214)	GO:0005737;GO:0005829;GO:0005654;GO:0005634	1;1;1;1	GO:0008565;GO:0005515;GO:0042826;GO:0008139	1;1;1;1	GO:0006607;GO:0015031;GO:0006606;GO:0000018;GO:0000072;GO:0006810;GO:0006259;GO:0000085;GO:0019221;GO:0019048	1;1;1;1;1;1;1;1;1;1	nucleoplasm;nucleus;cytoplasm;cytosol	1;1;1;1	histone deacetylase binding;nuclear localization sequence binding;protein transporter activity;protein binding	1;1;1;1	regulation of DNA recombination;NLS-bearing substrate import into nucleus;DNA metabolic process;transport;protein transport;protein import into nucleus;cytokine-mediated signaling pathway;M phase specific microtubule process;modulation by virus of host morphology or physiology;G2 phase of mitotic cell cycle	1;1;1;1;1;1;1;1;1;1	P52292
260	IPI:IPI00002966.2	Heat shock 70 kDa protein 4;Heat shock 70-related protein APG-2;HSP70RY	HSPA4;APG2	Heat shock 70 kDa protein 4	P34932	HSP74_HUMAN	1	48	48	44	59.4	56.4	94.33	840	0	0.0523675	0.542661	0	0.0832443	0.50242	6	0.996167	2.58479	0.122723	0.529776	FALSE	11.6801	0.0072504	0.043741	TRUE	+				260	;P34932(IPI00002966)	GO:0005737;GO:0005730;GO:0005634	1;1;1	GO:0005524;GO:0000166	1;1	GO:0045040;GO:0006986;GO:0006950;GO:0051131	1;1;1;1	nucleus;cytoplasm;nucleolus	1;1;1	ATP binding;nucleotide binding	1;1	response to unfolded protein;chaperone-mediated protein complex assembly;protein import into mitochondrial outer membrane;response to stress	1;1;1;1	P34932
272	IPI:IPI00003217.3	Proteasome subunit beta type-7;Proteasome subunit Z;Macropain chain Z;Multicatalytic endopeptidase complex chain Z	PSMB7	Proteasome subunit beta type-7	Q99436	PSB7_HUMAN	1	9	9	9	27.8	27.8	29.965	277	0	-0.010917	0.13763	0	-0.0374761	0.137678	6	0.997824	-1.28527	0.327435	0.688238	FALSE	587.016	2.902e-06	0.00445552	TRUE	+		+		272	;Q99436(IPI00003217)	GO:0000502;GO:0005737;GO:0005829;GO:0005634;GO:0005654;GO:0005839	1;1;1;1;1;1	GO:0008233;GO:0016787;GO:0005515;GO:0004175;GO:0004298	1;1;1;1;1	GO:0006915;GO:0042590;GO:0000278;GO:0006521;GO:0044281;GO:0016070;GO:0051436;GO:0031145;GO:0016071;GO:0051603;GO:0000209;GO:0043066;GO:0016032;GO:0006508;GO:0034641;GO:0002479;GO:0000082;GO:0051439;GO:0002474;GO:0051437;GO:0010467;GO:0019048;GO:0006977;GO:0042981	1;1;1;1;1;1;1;1;1;1;1;1;1;1;1;1;1;1;1;1;1;1;1;1	proteasome core complex;nucleoplasm;proteasome complex;nucleus;cytoplasm;cytosol	1;1;1;1;1;1	endopeptidase activity;peptidase activity;hydrolase activity;threonine-type endopeptidase activity;protein binding	1;1;1;1;1	antigen processing and presentation of peptide antigen via MHC class I;mitotic cell cycle;anaphase-promoting complex-dependent proteasomal ubiquitin-dependent protein catabolic process;DNA damage response, signal transduction by p53 class mediator resulting in cell cycle arrest;positive regulation of ubiquitin-protein ligase activity involved in mitotic cell cycle;antigen processing and presentat…	1;1;1;1;1;1;1;1;1;1;1;1;1;1;1;1;1;1;1;1;1;1;1;1	Q99436
280	IPI:IPI00003327.1	ADP-ribosylation factor-like protein 3	ARL3;ARFL3	ADP-ribosylation factor-like protein 3	P36405	ARL3_HUMAN	1	6	6	6	41.8	41.8	20.455	182	0	0.0111048	0.129234	0	0.0257298	0.130281	6	0.996991	1.31914	0.317902	0.68357	FALSE	10.3128	0.009272	0.0478764	TRUE	+				280	;P36405(IPI00003327)	GO:0016020;GO:0005929;GO:0042995;GO:0005881;GO:0005737;GO:0030496;GO:0000139;GO:0005730;GO:0005819;GO:0005886;GO:0005876;GO:0005856;GO:0005634;GO:0005815;GO:0032391;GO:0005813;GO:0005622;GO:0005794;GO:0072372	1;1;1;1;1;1;1;1;1;1;1;1;1;1;1;1;1;1;1	GO:0005515;GO:0000166;GO:0019003;GO:0008017;GO:0003924;GO:0046872;GO:0005525	1;1;1;1;1;1;1	GO:0060271;GO:0015031;GO:0006184;GO:0042461;GO:0007264;GO:0006810;GO:0051301;GO:0000910;GO:0001822;GO:0042073;GO:0007049	1;1;1;1;1;1;1;1;1;1;1	Golgi membrane;microtubule organizing center;midbody;cytoplasmic microtubule;nucleus;plasma membrane;cell projection;photoreceptor connecting cilium;spindle;spindle microtubule;Golgi apparatus;centrosome;intracellular;cilium;cytoplasm;nucleolus;cytoskeleton;primary cilium;membrane	1;1;1;1;1;1;1;1;1;1;1;1;1;1;1;1;1;1;1	microtubule binding;GDP binding;GTP binding;GTPase activity;nucleotide binding;protein binding;metal ion binding	1;1;1;1;1;1;1	kidney development;cell division;GTP catabolic process;transport;intraflagellar transport;protein transport;cytokinesis;cell cycle;photoreceptor cell development;small GTPase mediated signal transduction;cilium morphogenesis	1;1;1;1;1;1;1;1;1;1;1	P36405
300	IPI:IPI00003565.1	26S proteasome non-ATPase regulatory subunit 10;26S proteasome regulatory subunit p28;Gankyrin	PSMD10	26S proteasome non-ATPase regulatory subunit 10	O75832	PSD10_HUMAN	1	6	6	6	41.2	41.2	24.428	226	0	-0.00449827	0.442344	0	0.0436799	0.429091	6	0.999962	0.663691	0.575158	0.83125	FALSE	11.2402	0.00782225	0.0442336	TRUE	+				300	;O75832(IPI00003565)	GO:0000502;GO:0005838;GO:0005737;GO:0005829;GO:0015629;GO:0008540;GO:0005654;GO:0005634;GO:0045111	1;1;1;1;1;1;1;1;1	GO:0005515;GO:0008134	1;1	GO:0032436;GO:0090201;GO:0032088;GO:0006915;GO:0042590;GO:0000278;GO:0006521;GO:0030307;GO:0045737;GO:0044281;GO:0000122;GO:0016070;GO:0051436;GO:0031145;GO:0016071;GO:0007253;GO:0000209;GO:0043066;GO:0016032;GO:0034641;GO:0002479;GO:0000082;GO:0051439;GO:0070682;GO:0002474;GO:0043518;GO:0051437;GO:0031398;GO:0043409;GO:0010467;GO:0006977;GO:0042981	1;1;1;1;1;1;1;1;1;1;1;1;1;1;1;1;1;1;1;1;1;1;1;1;1;1;1;1;1;1;1;1	nucleoplasm;proteasome complex;nucleus;proteasome regulatory particle;intermediate filament cytoskeleton;actin cytoskeleton;cytoplasm;cytosol;proteasome regulatory particle, base subcomplex	1;1;1;1;1;1;1;1;1	protein binding;transcription factor binding	1;1	antigen processing and presentation of peptide antigen via MHC class I;mitotic cell cycle;negative regulation of MAPK cascade;anaphase-promoting complex-dependent proteasomal ubiquitin-dependent protein catabolic process;DNA damage response, signal transduction by p53 class mediator resulting in cell cycle arrest;positive regulation of protein ubiquitination;positive regulation of cell growth;pos…	1;1;1;1;1;1;1;1;1;1;1;1;1;1;1;1;1;1;1;1;1;1;1;1;1;1;1;1;1;1;1;1	O75832
316	IPI:IPI00003817.3	Rho GDP-dissociation inhibitor 2;Rho-GDI beta;Ly-GDI	ARHGDIB;GDIA2;GDID4;RAP1GN1	Rho GDP-dissociation inhibitor 2	P52566	GDIR2_HUMAN	1	23	23	23	89.1	89.1	22.988	201	0	0.044181	0.240736	0	0.0552133	0.232097	6	0.985031	4.34364	0.0491289	0.39966	FALSE	15.2835	0.00425382	0.0368229	TRUE	+				316	;P52566(IPI00003817)	GO:0016023;GO:0005737;GO:0005829;GO:0005856	1;1;1;1	GO:0005094;GO:0005096	1;1	GO:0030036;GO:0007266;GO:0051056;GO:0007264;GO:0007162;GO:0007275;GO:0043547;GO:0006928;GO:0006955	1;1;1;1;1;1;1;1;1	cytoplasm;cytosol;cytoskeleton;cytoplasmic membrane-bounded vesicle	1;1;1;1	GTPase activator activity;Rho GDP-dissociation inhibitor activity	1;1	actin cytoskeleton organization;regulation of small GTPase mediated signal transduction;negative regulation of cell adhesion;immune response;positive regulation of GTPase activity;Rho protein signal transduction;cellular component movement;multicellular organismal development;small GTPase mediated signal transduction	1;1;1;1;1;1;1;1;1	P52566
323	IPI:IPI00003865.1	Heat shock cognate 71 kDa protein;Heat shock 70 kDa protein 8	HSPA8;HSC70;HSP73;HSPA10	Isoform 1 of Heat shock cognate 71 kDa protein;Isoform 2 of Heat shock cognate 71 kDa protein	P11142-1;P11142;P11142-2	HSP7C_HUMAN	2	48	48	34	68.6	57.1	70.897	646	0	0.253995	1.24382	0	0.255076	1.24294	6	0.981151	5.66932	0.0297321	0.357252	FALSE	43.9666	0.000516912	0.0235882	TRUE	+				323	;P11142(IPI00003865)	GO:0000974;GO:0042470;GO:0005737;GO:0005681;GO:0005730;GO:0005829;GO:0005886;GO:0070062;GO:0005634;GO:0005622;GO:0009986;GO:0061202;GO:0030529	1;1;1;1;1;1;1;1;1;1;1;1;1	GO:0005524;GO:0005515;GO:0000166;GO:0042623;GO:0051082	1;1;1;1;1	GO:0007269;GO:0006457;GO:0051726;GO:0006397;GO:0016070;GO:0006351;GO:0016071;GO:0007411;GO:0045892;GO:0008380;GO:0006986;GO:0051085;GO:0006355;GO:0006950;GO:0016044;GO:0010467;GO:0007268;GO:0006892;GO:0019048	1;1;1;1;1;1;1;1;1;1;1;1;1;1;1;1;1;1;1	clathrin-sculpted gamma-aminobutyric acid transport vesicle membrane;nucleus;plasma membrane;melanosome;ribonucleoprotein complex;intracellular;Prp19 complex;spliceosomal complex;cytoplasm;cytosol;extracellular vesicular exosome;nucleolus;cell surface	1;1;1;1;1;1;1;1;1;1;1;1;1	ATP binding;unfolded protein binding;nucleotide binding;protein binding;ATPase activity, coupled	1;1;1;1;1	negative regulation of transcription, DNA-dependent;response to unfolded protein;cellular membrane organization;synaptic transmission;transcription, DNA-dependent;RNA metabolic process;protein folding;regulation of cell cycle;regulation of transcription, DNA-dependent;axon guidance;response to stress;RNA splicing;post-Golgi vesicle-mediated transport;mRNA metabolic process;gene expression;neurotr…	1;1;1;1;1;1;1;1;1;1;1;1;1;1;1;1;1;1;1	P11142
331	IPI:IPI00003927.5	40 kDa peptidyl-prolyl cis-trans isomerase;Cyclophilin-40;Cyclophilin-related protein	PPID;CYP40;CYPD	40 kDa peptidyl-prolyl cis-trans isomerase	Q08752	PPID_HUMAN	1	21	21	21	57	57	40.763	370	0	0.052746	0.529857	0	0.00381778	0.489664	6	0.99591	0.064504	0.954436	0.982513	FALSE	11.2466	0.0078135	0.0442336	TRUE	+				331	;Q08752(IPI00003927)	GO:0005737;GO:0005730;GO:0005634;GO:0005654;GO:0045111	1;1;1;1;1	GO:0003755;GO:0030331;GO:0031072;GO:0051879;GO:0005515;GO:0030544;GO:0016853;GO:0042277;GO:0016018;GO:0008134	1;1;1;1;1;1;1;1;1;1	GO:0061077;GO:0015031;GO:0006457;GO:0034389;GO:0006915;GO:0000122;GO:0006810;GO:0050714;GO:0071492;GO:0043065;GO:0045070;GO:0006461;GO:0000413;GO:0019076	1;1;1;1;1;1;1;1;1;1;1;1;1;1	nucleoplasm;nucleus;intermediate filament cytoskeleton;cytoplasm;nucleolus	1;1;1;1;1	estrogen receptor binding;Hsp70 protein binding;Hsp90 protein binding;peptidyl-prolyl cis-trans isomerase activity;isomerase activity;peptide binding;protein binding;cyclosporin A binding;heat shock protein binding;transcription factor binding	1;1;1;1;1;1;1;1;1;1	viral release from host cell;cellular response to UV-A;chaperone-mediated protein folding;transport;protein folding;protein peptidyl-prolyl isomerization;apoptotic process;lipid particle organization;negative regulation of transcription from RNA polymerase II promoter;positive regulation of apoptotic process;positive regulation of viral genome replication;protein transport;protein complex assembl…	1;1;1;1;1;1;1;1;1;1;1;1;1;1	Q08752
380	IPI:IPI00004671.2	Golgin subfamily B member 1;Giantin;Macrogolgin;372 kDa Golgi complex-associated protein;GCP372	GOLGB1	Golgin subfamily B member 1	Q14789	GOGB1_HUMAN	1	18	18	18	7.7	7.7	376.01	3259	0	0.0441489	0.579692	0	0.0762101	0.582115	6	0.997658	2.25943	0.152351	0.555765	FALSE	12.585	0.00625465	0.0413025	TRUE	+				380	;Q14789(IPI00004671)	GO:0016020;GO:0000139;GO:0005795;GO:0016021;GO:0005793;GO:0005794	1;1;1;1;1;1	GO:0005515	1	GO:0007030	1	endoplasmic reticulum-Golgi intermediate compartment;Golgi membrane;integral to membrane;Golgi stack;Golgi apparatus;membrane	1;1;1;1;1;1	protein binding	1	Golgi organization	1	Q14789
419	IPI:IPI00005159.3	Actin-related protein 2;Actin-like protein 2	ACTR2;ARP2	Actin-related protein 2	P61160	ARP2_HUMAN	1	28	28	28	57.9	57.9	44.76	394	0	-0.00578473	0.372366	0	-0.0138864	0.369681	6	0.999911	-1.53463	0.26463	0.644623	FALSE	16.2283	0.00377562	0.0353912	TRUE	+				419	;P61160(IPI00005159)	GO:0042995;GO:0005938;GO:0005737;GO:0005829;GO:0015629;GO:0005856;GO:0005885;GO:0030478	1;1;1;1;1;1;1;1	GO:0005524;GO:0000166;GO:0003779	1;1;1	GO:0030833;GO:0034314;GO:0030036;GO:0008356;GO:0051321;GO:0007163;GO:0051653;GO:0045087;GO:0016482;GO:0033206;GO:0006928;GO:0038096	1;1;1;1;1;1;1;1;1;1;1;1	cell cortex;cell projection;Arp2/3 protein complex;actin cytoskeleton;cytoplasm;cytosol;actin cap;cytoskeleton	1;1;1;1;1;1;1;1	ATP binding;nucleotide binding;actin binding	1;1;1	actin cytoskeleton organization;innate immune response;regulation of actin filament polymerization;meiotic cell cycle;spindle localization;Arp2/3 complex-mediated actin nucleation;asymmetric cell division;meiotic cytokinesis;establishment or maintenance of cell polarity;cellular component movement;Fc-gamma receptor signaling pathway involved in phagocytosis;cytoplasmic transport	1;1;1;1;1;1;1;1;1;1;1;1	P61160
420	IPI:IPI00005160.3	Actin-related protein 2/3 complex subunit 1B;Arp2/3 complex 41 kDa subunit;p41-ARC	ARPC1B;ARC41	Actin-related protein 2/3 complex subunit 1B	O15143	ARC1B_HUMAN	1	19	19	18	59.1	53	40.949	372	0	0.0610128	0.297511	0	0.0313851	0.295891	6	0.980976	0.922388	0.453701	0.769556	FALSE	37.1486	0.000723839	0.0262713	TRUE	+				420	;O15143(IPI00005160)	GO:0005737;GO:0015629;GO:0005856;GO:0005885	1;1;1;1	GO:0005200;GO:0003779	1;1	GO:0030833;GO:0006928	1;1	Arp2/3 protein complex;actin cytoskeleton;cytoplasm;cytoskeleton	1;1;1;1	structural constituent of cytoskeleton;actin binding	1;1	regulation of actin filament polymerization;cellular component movement	1;1	O15143
421	IPI:IPI00005161.3	Actin-related protein 2/3 complex subunit 2;Arp2/3 complex 34 kDa subunit	ARPC2;ARC34;PRO2446	Actin-related protein 2/3 complex subunit 2	O15144	ARPC2_HUMAN	1	21	21	21	56	56	34.333	300	0	0.0561145	0.403458	0	0.0342065	0.407157	6	0.991725	1.20141	0.352563	0.70813	FALSE	23.9639	0.00173681	0.0330512	TRUE	+				421	;O15144(IPI00005161)	GO:0031252;GO:0042995;GO:0005737;GO:0005829;GO:0015629;GO:0005886;GO:0005856;GO:0005885;GO:0005925;GO:0005768;GO:0005794	1;1;1;1;1;1;1;1;1;1;1	GO:0071933;GO:0005515;GO:0035650;GO:0019894;GO:0005200;GO:0003779	1;1;1;1;1;1	GO:0030833;GO:1900026;GO:0045087;GO:0030838;GO:0006928;GO:0038096	1;1;1;1;1;1	focal adhesion;plasma membrane;cell projection;endosome;Arp2/3 protein complex;cell leading edge;Golgi apparatus;actin cytoskeleton;cytoplasm;cytosol;cytoskeleton	1;1;1;1;1;1;1;1;1;1;1	structural constituent of cytoskeleton;kinesin binding;AP-1 adaptor complex binding;actin binding;protein binding;Arp2/3 complex binding	1;1;1;1;1;1	positive regulation of substrate adhesion-dependent cell spreading;positive regulation of actin filament polymerization;innate immune response;regulation of actin filament polymerization;cellular component movement;Fc-gamma receptor signaling pathway involved in phagocytosis	1;1;1;1;1;1	O15144
422	IPI:IPI00005162.3	Actin-related protein 2/3 complex subunit 3;Arp2/3 complex 21 kDa subunit	ARPC3;ARC21	Actin-related protein 2/3 complex subunit 3	O15145	ARPC3_HUMAN	1	6	6	6	33.7	33.7	20.546	178	0	0.0794325	0.404545	0	0.0716597	0.427089	6	0.982684	1.32328	0.316757	0.68357	FALSE	18.8196	0.00281155	0.0347039	TRUE	+				422	;O15145(IPI00005162)	GO:0042995;GO:0005737;GO:0005829;GO:0015629;GO:0005856;GO:0005885;GO:0030027	1;1;1;1;1;1;1	GO:0005515;GO:0005200;GO:0003779	1;1;1	GO:0030833;GO:0034314;GO:0045087;GO:0006928;GO:0038096	1;1;1;1;1	cell projection;Arp2/3 protein complex;actin cytoskeleton;cytoplasm;cytosol;cytoskeleton;lamellipodium	1;1;1;1;1;1;1	structural constituent of cytoskeleton;actin binding;protein binding	1;1;1	innate immune response;regulation of actin filament polymerization;Arp2/3 complex-mediated actin nucleation;cellular component movement;Fc-gamma receptor signaling pathway involved in phagocytosis	1;1;1;1;1	O15145
471	IPI:IPI00005719.1	Ras-related protein Rab-1A;YPT1-related protein	RAB1A;RAB1	Isoform 1 of Ras-related protein Rab-1A;Isoform 2 of Ras-related protein Rab-1A	P62820-1;P62820;P62820-2	RAB1A_HUMAN	3	11	3	3	66.8	24.4	22.677	205	0	0.0165049	0.138712	0	-0.0106879	0.144392	6	0.994051	-0.378761	0.741293	0.904908	FALSE	10.0465	0.00976279	0.0490375	TRUE	+				471	;P62820(IPI00005719)	GO:0005783;GO:0000139;GO:0005794	1;1;1	GO:0000166;GO:0003924;GO:0005525	1;1;1	GO:0015031;GO:0006184;GO:0000278;GO:0007264;GO:0006810;GO:0016192	1;1;1;1;1;1	Golgi membrane;Golgi apparatus;endoplasmic reticulum	1;1;1	GTP binding;GTPase activity;nucleotide binding	1;1;1	mitotic cell cycle;GTP catabolic process;vesicle-mediated transport;transport;protein transport;small GTPase mediated signal transduction	1;1;1;1;1;1	P62820
474	IPI:IPI00005724.1	LanC-like protein 1;40 kDa erythrocyte membrane protein;p40	LANCL1;GPR69A	LanC-like protein 1	O43813	LANC1_HUMAN	1	10	10	10	28.1	28.1	45.283	399	0	0.0646295	0.268495	0	0.0417962	0.255794	6	0.97305	0.832117	0.492877	0.785648	FALSE	18.6915	0.00285004	0.0347039	TRUE	+				474	;O43813(IPI00005724)	GO:0016020;GO:0005737;GO:0005887;GO:0043231;GO:0005634;GO:0015630	1;1;1;1;1;1	GO:0004930;GO:0043295;GO:0008270;GO:0017124;GO:0003824;GO:0046872;GO:0050750	1;1;1;1;1;1;1	GO:0008152;GO:0007186	1;1	nucleus;integral to plasma membrane;intracellular membrane-bounded organelle;cytoplasm;microtubule cytoskeleton;membrane	1;1;1;1;1;1	G-protein coupled receptor activity;catalytic activity;low-density lipoprotein particle receptor binding;glutathione binding;SH3 domain binding;zinc ion binding;metal ion binding	1;1;1;1;1;1;1	G-protein coupled receptor signaling pathway;metabolic process	1;1	O43813
491	IPI:IPI00005861.1	U4/U6 small nuclear ribonucleoprotein Prp3;Pre-mRNA-splicing factor 3;U4/U6 snRNP 90 kDa protein	PRPF3;HPRP3;PRP3	Isoform 1 of U4/U6 small nuclear ribonucleoprotein Prp3;Isoform 2 of U4/U6 small nuclear ribonucleoprotein Prp3	O43395-1;O43395;O43395-2	PRPF3_HUMAN	2	16	16	16	28.7	28.7	77.528	683	0	-0.0179312	0.144017	0	0.013925	0.147303	6	0.994888	0.428436	0.710063	0.893319	FALSE	11.1185	0.00799236	0.0445522	TRUE	+				491	;O43395(IPI00005861)	GO:0005737;GO:0046540;GO:0005730;GO:0005681;GO:0015030;GO:0005634;GO:0016607	1;1;1;1;1;1;1	GO:0005515	1	GO:0006397;GO:0000398;GO:0000375;GO:0008380	1;1;1;1	nuclear speck;nucleus;Cajal body;spliceosomal complex;U4/U6 x U5 tri-snRNP complex;cytoplasm;nucleolus	1;1;1;1;1;1;1	protein binding	1	RNA splicing, via transesterification reactions;RNA splicing;mRNA processing;mRNA splicing, via spliceosome	1;1;1;1	O43395
537	IPI:IPI00006408.4	Nitric oxide synthase-interacting protein;eNOS-interacting protein	NOSIP;CGI-25	Nitric oxide synthase-interacting protein	Q9Y314	NOSIP_HUMAN	1	10	10	10	48.8	48.8	33.172	301	0	0.0458441	0.210802	0	0.0174451	0.21216	6	0.978394	0.482885	0.676866	0.878543	FALSE	70.0088	0.000203968	0.0189578	TRUE	+				537	;Q9Y314(IPI00006408)	GO:0005737;GO:0000139;GO:0005829;GO:0005634	1;1;1;1	GO:0005515	1	GO:0051001;GO:0044281;GO:0043086;GO:0050999;GO:0046209	1;1;1;1;1	Golgi membrane;nucleus;cytoplasm;cytosol	1;1;1;1	protein binding	1	small molecule metabolic process;nitric oxide metabolic process;negative regulation of catalytic activity;negative regulation of nitric-oxide synthase activity;regulation of nitric-oxide synthase activity	1;1;1;1;1	Q9Y314
645	IPI:IPI00007682.2	V-type proton ATPase catalytic subunit A;Vacuolar proton pump subunit alpha;V-ATPase 69 kDa subunit;Vacuolar ATPase isoform VA68	ATP6V1A;ATP6A1;ATP6V1A1;VPP2	V-type proton ATPase catalytic subunit A	P38606	VATA_HUMAN	1	26	26	26	50.4	50.4	68.303	617	0	0.0481014	0.309392	0	0.0231281	0.304615	6	0.989511	0.796929	0.509068	0.791301	FALSE	13.2396	0.00565653	0.0394443	TRUE	+				645	;P38606(IPI00007682)	GO:0016324;GO:0005887;GO:0005829;GO:0005739;GO:0033180;GO:0005886;GO:0016469;GO:0005902;GO:0033178	1;1;1;1;1;1;1;1;1	GO:0005524;GO:0016787;GO:0000166;GO:0046961;GO:0016820	1;1;1;1;1	GO:0008286;GO:0033572;GO:0006810;GO:0015991;GO:0006879;GO:0046034;GO:0090382;GO:0051701;GO:0015992;GO:0055085;GO:0006811	1;1;1;1;1;1;1;1;1;1;1	mitochondrion;proton-transporting two-sector ATPase complex, catalytic domain;plasma membrane;integral to plasma membrane;apical plasma membrane;proton-transporting V-type ATPase, V1 domain;proton-transporting two-sector ATPase complex;cytosol;microvillus	1;1;1;1;1;1;1;1;1	proton-transporting ATPase activity, rotational mechanism;ATP binding;hydrolase activity;hydrolase activity, acting on acid anhydrides, catalyzing transmembrane movement of substances;nucleotide binding	1;1;1;1;1	proton transport;ATP metabolic process;transferrin transport;transport;ion transport;ATP hydrolysis coupled proton transport;phagosome maturation;transmembrane transport;insulin receptor signaling pathway;interaction with host;cellular iron ion homeostasis	1;1;1;1;1;1;1;1;1;1;1	P38606
647	IPI:IPI00007694.5	Protein phosphatase methylesterase 1	PPME1;PME1;PP2593;PRO0750	Isoform 1 of Protein phosphatase methylesterase 1;Isoform 2 of Protein phosphatase methylesterase 1	Q9Y570-1;Q9Y570;Q9Y570-2	PPME1_HUMAN	3	14	14	14	42.2	42.2	42.315	386	0	0.0598198	0.313037	0	0.0605059	0.308074	6	0.983669	4.99549	0.0378139	0.377614	FALSE	14.3481	0.0048224	0.0376153	TRUE	+				647	;Q9Y570(IPI00007694)			GO:0008601;GO:0019903;GO:0019901;GO:0016787;GO:0004091;GO:0051721;GO:0004864;GO:0051722	1;1;1;1;1;1;1;1	GO:0006482	1			protein phosphatase binding;protein kinase binding;carboxylesterase activity;protein phosphatase type 2A regulator activity;hydrolase activity;protein C-terminal methylesterase activity;protein phosphatase 2A binding;protein phosphatase inhibitor activity	1;1;1;1;1;1;1;1	protein demethylation	1	Q9Y570
659	IPI:IPI00007765.5	Stress-70 protein, mitochondrial;75 kDa glucose-regulated protein;GRP 75;Heat shock 70 kDa protein 9;Peptide-binding protein 74;Mortalin	HSPA9;GRP75;HSPA9B	Stress-70 protein, mitochondrial	P38646	GRP75_HUMAN	1	41	41	41	58	58	73.68	679	0	0.0940968	0.422648	0	0.0898517	0.406489	6	0.977264	9.58082	0.0107193	0.312873	FALSE	23.0535	0.00187631	0.0330512	TRUE	+				659	;P38646(IPI00007765)	GO:0042645;GO:0005737;GO:0005730;GO:0005739;GO:0005634;GO:0009986	1;1;1;1;1;1	GO:0005524;GO:0005515;GO:0000166;GO:0051082;GO:0019899	1;1;1;1;1	GO:0006457;GO:0006611;GO:0044267;GO:0043066;GO:0006626	1;1;1;1;1	mitochondrion;mitochondrial nucleoid;nucleus;cytoplasm;nucleolus;cell surface	1;1;1;1;1;1	ATP binding;unfolded protein binding;enzyme binding;nucleotide binding;protein binding	1;1;1;1;1	protein export from nucleus;protein folding;cellular protein metabolic process;negative regulation of apoptotic process;protein targeting to mitochondrion	1;1;1;1;1	P38646
663	IPI:IPI00007812.1	V-type proton ATPase subunit B, brain isoform;Vacuolar proton pump subunit B 2;Endomembrane proton pump 58 kDa subunit;HO57	ATP6V1B2;ATP6B2;VPP3	V-type proton ATPase subunit B, brain isoform	P21281	VATB2_HUMAN	2	23	23	23	55.6	55.6	56.5	511	0	0.031603	0.29551	0	0.0469504	0.289871	6	0.995247	2.67562	0.115899	0.524563	FALSE	11.6174	0.00732804	0.0437987	TRUE	+				663	;P21281(IPI00007812)	GO:0016020;GO:0042470;GO:0005737;GO:0012505;GO:0005829;GO:0016021;GO:0033180;GO:0005886;GO:0043231;GO:0005902;GO:0033178;GO:0005794	1;1;1;1;1;1;1;1;1;1;1;1	GO:0005524;GO:0016787;GO:0015078;GO:0046961;GO:0016820	1;1;1;1;1	GO:0008286;GO:0033572;GO:0006810;GO:0015991;GO:0006879;GO:0046034;GO:0090382;GO:0051701;GO:0015992;GO:0055085;GO:0006811	1;1;1;1;1;1;1;1;1;1;1	proton-transporting two-sector ATPase complex, catalytic domain;integral to membrane;plasma membrane;melanosome;intracellular membrane-bounded organelle;endomembrane system;Golgi apparatus;proton-transporting V-type ATPase, V1 domain;cytoplasm;cytosol;microvillus;membrane	1;1;1;1;1;1;1;1;1;1;1;1	proton-transporting ATPase activity, rotational mechanism;ATP binding;hydrogen ion transmembrane transporter activity;hydrolase activity;hydrolase activity, acting on acid anhydrides, catalyzing transmembrane movement of substances	1;1;1;1;1	proton transport;ATP metabolic process;transferrin transport;transport;ion transport;ATP hydrolysis coupled proton transport;phagosome maturation;transmembrane transport;insulin receptor signaling pathway;interaction with host;cellular iron ion homeostasis	1;1;1;1;1;1;1;1;1;1;1	P21281
692	IPI:IPI00008223.3	UV excision repair protein RAD23 homolog B;XP-C repair-complementing complex 58 kDa protein	RAD23B	UV excision repair protein RAD23 homolog B	P54727	RD23B_HUMAN	1	13	13	11	31.8	27.4	43.171	409	0	0.0242853	0.178823	0	0.0504421	0.177732	6	0.992133	1.26848	0.33229	0.690985	FALSE	18.4211	0.00293396	0.0347039	TRUE	+				692	;P54727(IPI00008223)	GO:0000502;GO:0005737;GO:0005730;GO:0005654;GO:0005634;GO:0071942	1;1;1;1;1;1	GO:0031593;GO:0003697;GO:0005515;GO:0003684	1;1;1;1	GO:0006289;GO:0000715;GO:0032434;GO:0007283;GO:0006974;GO:0006281;GO:0043161;GO:0000718	1;1;1;1;1;1;1;1	nucleoplasm;proteasome complex;XPC complex;nucleus;cytoplasm;nucleolus	1;1;1;1;1;1	damaged DNA binding;polyubiquitin binding;single-stranded DNA binding;protein binding	1;1;1;1	nucleotide-excision repair, DNA damage removal;proteasomal ubiquitin-dependent protein catabolic process;nucleotide-excision repair, DNA damage recognition;spermatogenesis;response to DNA damage stimulus;DNA repair;nucleotide-excision repair;regulation of proteasomal ubiquitin-dependent protein catabolic process	1;1;1;1;1;1;1;1	P54727
709	IPI:IPI00008477.1	Targeting protein for Xklp2;Restricted expression proliferation-associated protein 100;Differentially expressed in cancerous and non-cancerous lung cells 2;Protein fls353;Hepatocellular carcinoma-associated antigen 519	TPX2;C20orf1;C20orf2;DIL2;HCA519	Targeting protein for Xklp2	Q9ULW0	TPX2_HUMAN	1	20	20	20	32.5	32.5	85.652	747	0	-0.0398258	1.04262	0	-0.147982	1.01107	6	0.999474	-1.17369	0.361364	0.714549	FALSE	17.7826	0.00314743	0.0347039	TRUE	+				709	;Q9ULW0(IPI00008477)	GO:0000922;GO:0005874;GO:0005737;GO:0005730;GO:0005819;GO:0005856;GO:0005634;GO:0015630	1;1;1;1;1;1;1;1	GO:0005524;GO:0019901;GO:0005515;GO:0005525	1;1;1;1	GO:0007067;GO:0060236;GO:0006915;GO:0051301;GO:0032147;GO:0008283;GO:0007049	1;1;1;1;1;1;1	nucleus;spindle;cytoplasm;microtubule cytoskeleton;nucleolus;cytoskeleton;microtubule;spindle pole	1;1;1;1;1;1;1;1	protein kinase binding;ATP binding;GTP binding;protein binding	1;1;1;1	cell division;activation of protein kinase activity;apoptotic process;cell proliferation;mitosis;regulation of mitotic spindle organization;cell cycle	1;1;1;1;1;1;1	Q9ULW0
766	IPI:IPI00009253.2	Alpha-soluble NSF attachment protein;N-ethylmaleimide-sensitive factor attachment protein alpha	NAPA;SNAPA	Alpha-soluble NSF attachment protein	P54920	SNAA_HUMAN	2	21	21	21	73.6	73.6	33.232	295	0	0.0676445	0.341157	0	0.0709699	0.325336	6	0.982314	5.87929	0.0277323	0.357252	FALSE	13.8731	0.00515563	0.0382233	TRUE	+				766	;P54920(IPI00009253)	GO:0016020;GO:0070044;GO:0005829	1;1;1	GO:0000149;GO:0005515;GO:0019905	1;1;1	GO:0007420;GO:0015031;GO:0006891;GO:0045176;GO:0006810;GO:0035494;GO:0010807;GO:0006886;GO:0035249;GO:0016044;GO:0006944;GO:0016192;GO:0030182;GO:0006892	1;1;1;1;1;1;1;1;1;1;1;1;1;1	synaptobrevin 2-SNAP-25-syntaxin-1a complex;cytosol;membrane	1;1;1	SNARE binding;protein binding;syntaxin binding	1;1;1	intracellular protein transport;regulation of synaptic vesicle priming;cellular membrane organization;SNARE complex disassembly;vesicle-mediated transport;synaptic transmission, glutamatergic;transport;post-Golgi vesicle-mediated transport;neuron differentiation;protein transport;intra-Golgi vesicle-mediated transport;brain development;cellular membrane fusion;apical protein localization	1;1;1;1;1;1;1;1;1;1;1;1;1;1	P54920
774	IPI:IPI00009315.6	Golgi resident protein GCP60;Acyl-CoA-binding domain-containing protein 3;Golgi phosphoprotein 1;Golgi complex-associated protein 1;PBR- and PKA-associated protein 7;Peripheral benzodiazepine receptor-associated protein PAP7	ACBD3;GCP60;GOCAP1;GOLPH1	Golgi resident protein GCP60	Q9H3P7	GCP60_HUMAN	1	10	10	10	25.4	25.4	60.593	528	0	0.140302	0.772272	0	0.125625	0.76799	6	0.985354	1.19875	0.353397	0.709181	FALSE	50.9026	0.000385716	0.0224828	TRUE	+				774	;Q9H3P7(IPI00009315)	GO:0016020;GO:0000139;GO:0016021;GO:0005739;GO:0005794	1;1;1;1;1	GO:0000062	1	GO:0006629;GO:0006810;GO:0006694	1;1;1	mitochondrion;Golgi membrane;integral to membrane;Golgi apparatus;membrane	1;1;1;1;1	fatty-acyl-CoA binding	1	lipid metabolic process;transport;steroid biosynthetic process	1;1;1	Q9H3P7
830	IPI:IPI00009896.1	Epoxide hydrolase 1;Microsomal epoxide hydrolase;Epoxide hydratase	EPHX1;EPHX;EPOX	Epoxide hydrolase 1	P07099	HYEP_HUMAN	1	10	10	10	27	27	52.948	455	0	0.0256543	0.204765	0	0.00379592	0.213893	6	0.993367	0.0528044	0.962688	0.986402	FALSE	17.8171	0.0031353	0.0347039	TRUE	+				830	;P07099(IPI00009896)	GO:0016020;GO:0005783;GO:0031090;GO:0016021;GO:0043231;GO:0005789	1;1;1;1;1;1	GO:0033961;GO:0016787;GO:0003824;GO:0004301	1;1;1;1	GO:0014070;GO:0009636;GO:0019439;GO:0006725	1;1;1;1	integral to membrane;endoplasmic reticulum membrane;intracellular membrane-bounded organelle;endoplasmic reticulum;organelle membrane;membrane	1;1;1;1;1;1	catalytic activity;epoxide hydrolase activity;hydrolase activity;cis-stilbene-oxide hydrolase activity	1;1;1;1	response to organic cyclic compound;aromatic compound catabolic process;cellular aromatic compound metabolic process;response to toxic substance	1;1;1;1	P07099
855	IPI:IPI00010154.3	Rab GDP dissociation inhibitor alpha;Guanosine diphosphate dissociation inhibitor 1;Oligophrenin-2;Protein XAP-4	GDI1;GDIL;OPHN2;RABGDIA;XAP4	Rab GDP dissociation inhibitor alpha	P31150	GDIA_HUMAN	1	25	14	14	59.5	37.4	50.582	447	0	-0.0105191	0.388102	0	0.0372926	0.380901	6	0.999732	0.397971	0.729113	0.901016	FALSE	30.4539	0.0010765	0.0294218	TRUE	+				855	;P31150(IPI00010154)	GO:0005737;GO:0030496;GO:0005829;GO:0043005;GO:0043234	1;1;1;1;1	GO:0005092;GO:0005515;GO:0017137;GO:0005093;GO:0005096	1;1;1;1;1	GO:0015031;GO:0007165;GO:0050771;GO:0051056;GO:0007264;GO:0051592;GO:0043547	1;1;1;1;1;1;1	neuron projection;midbody;protein complex;cytoplasm;cytosol	1;1;1;1;1	GTPase activator activity;Rab GTPase binding;Rab GDP-dissociation inhibitor activity;protein binding;GDP-dissociation inhibitor activity	1;1;1;1;1	regulation of small GTPase mediated signal transduction;signal transduction;positive regulation of GTPase activity;protein transport;negative regulation of axonogenesis;response to calcium ion;small GTPase mediated signal transduction	1;1;1;1;1;1;1	P31150
875	IPI:IPI00219675.1;IPI:IPI00010271.3	Ras-related C3 botulinum toxin substrate 1;p21-Rac1;Ras-like protein TC25;Cell migration-inducing gene 5 protein	RAC1;MIG5	Isoform B of Ras-related C3 botulinum toxin substrate 1;Isoform A of Ras-related C3 botulinum toxin substrate 1	P63000-2;P63000;P63000-1	RAC1_HUMAN	2	12	12	3	50.7	13.7	23.467	211	0	0.00167723	0.200995	0	0.0322509	0.200757	6	0.999974	0.931305	0.450012	0.766362	FALSE	14.806	0.00453073	0.0373904	TRUE	+				875	;P63000(IPI00010271;IPI00219675)	GO:0016020;GO:0042995;GO:0031410;GO:0042470;GO:0016023;GO:0032587;GO:0005737;GO:0019897;GO:0000139;GO:0005829;GO:0005886;GO:0005622;GO:0001891;GO:0005802;GO:0030027	1;1;1;1;1;1;1;1;1;1;1;1;1;1;1	GO:0030742;GO:0019901;GO:0005515;GO:0000166;GO:0031996;GO:0017137;GO:0003924;GO:0005525;GO:0019899	1;1;1;1;1;1;1;1;1	GO:0007596;GO:0048011;GO:0045216;GO:0060263;GO:0051668;GO:0030041;GO:0009611;GO:0034446;GO:0030036;GO:0006184;GO:0050690;GO:0043652;GO:0002551;GO:0007160;GO:0007155;GO:0030032;GO:0006911;GO:0030168;GO:0048870;GO:0007264;GO:0006935;GO:0048261;GO:0032707;GO:0006954;GO:0048813;GO:0060071;GO:0016477;GO:0021799;GO:0016358;GO:0097190;GO:0007015;GO:0043065;GO:0097178;GO:0010310;GO:0045087;GO:0007411;GO:…	1;1;1;1;1;1;1;1;1;1;1;1;1;1;1;1;1;1;1;1;1;1;1;1;1;1;1;1;1;1;1;1;1;1;1;1;1;1;1;1;1;1;1;1;1;1;1;1;1;1;1;1;1;1;1;1;1;1;1;1;1	extrinsic to plasma membrane;Golgi membrane;ruffle membrane;plasma membrane;melanosome;cell projection;phagocytic cup;intracellular;cytoplasm;trans-Golgi network;cytosol;cytoplasmic vesicle;cytoplasmic membrane-bounded vesicle;lamellipodium;membrane	1;1;1;1;1;1;1;1;1;1;1;1;1;1;1	protein kinase binding;Rab GTPase binding;GTP binding;GTP-dependent protein binding;enzyme binding;GTPase activity;nucleotide binding;protein binding;thioesterase binding	1;1;1;1;1;1;1;1;1	inflammatory response;positive regulation of Rho protein signal transduction;apoptotic signaling pathway;dendrite morphogenesis;actin filament organization;epithelial cell morphogenesis;Wnt receptor signaling pathway, planar cell polarity pathway;intracellular signal transduction;Fc-epsilon receptor signaling pathway;platelet activation;cell migration;GTP catabolic process;ruffle organization;vir…	1;1;1;1;1;1;1;1;1;1;1;1;1;1;1;1;1;1;1;1;1;1;1;1;1;1;1;1;1;1;1;1;1;1;1;1;1;1;1;1;1;1;1;1;1;1;1;1;1;1;1;1;1;1;1;1;1;1;1;1;1	P63000
886	IPI:IPI00010414.4	PDZ and LIM domain protein 1;Elfin;LIM domain protein CLP-36;C-terminal LIM domain protein 1	PDLIM1;CLIM1;CLP36	PDZ and LIM domain protein 1	O00151	PDLI1_HUMAN	1	16	16	16	49.8	49.8	36.071	329	0	0.00542482	0.0845918	0	-0.00717242	0.0856907	6	0.998358	-0.248787	0.826742	0.933396	FALSE	11.8288	0.00707116	0.0432984	TRUE	+				886	;O00151(IPI00010414)	GO:0005737;GO:0005667;GO:0005856	1;1;1	GO:0008270;GO:0046872;GO:0003713	1;1;1	GO:0006979;GO:0001666;GO:0006355	1;1;1	transcription factor complex;cytoplasm;cytoskeleton	1;1;1	transcription coactivator activity;zinc ion binding;metal ion binding	1;1;1	regulation of transcription, DNA-dependent;response to oxidative stress;response to hypoxia	1;1;1	O00151
894	IPI:IPI00010471.5	Plastin-2;L-plastin;Lymphocyte cytosolic protein 1;LC64P	LCP1;PLS2	Plastin-2	P13796	PLSL_HUMAN	1	54	54	47	77.8	74.2	70.289	627	0	0.0751546	0.327447	0	0.0758128	0.327414	6	0.975707	9.55378	0.0107791	0.312873	FALSE	49.3972	0.00040957	0.022989	TRUE	+				894	;P13796(IPI00010471)	GO:0016020;GO:0042995;GO:0030054;GO:0032587;GO:0005737;GO:0005829;GO:0015629;GO:0005886;GO:0005856;GO:0001891;GO:0001726;GO:0005884	1;1;1;1;1;1;1;1;1;1;1;1	GO:0051015;GO:0042802;GO:0003779;GO:0046872;GO:0005509	1;1;1;1;1	GO:0031100;GO:0051017;GO:0002286;GO:0033157	1;1;1;1	ruffle membrane;cell junction;plasma membrane;cell projection;phagocytic cup;actin cytoskeleton;cytoplasm;cytosol;actin filament;cytoskeleton;membrane;ruffle	1;1;1;1;1;1;1;1;1;1;1;1	identical protein binding;actin binding;actin filament binding;calcium ion binding;metal ion binding	1;1;1;1;1	actin filament bundle assembly;T cell activation involved in immune response;organ regeneration;regulation of intracellular protein transport	1;1;1;1	P13796
904	IPI:IPI00010720.1	T-complex protein 1 subunit epsilon;CCT-epsilon	CCT5;CCTE;KIAA0098	T-complex protein 1 subunit epsilon	P48643	TCPE_HUMAN	1	41	41	41	71	71	59.67	541	0	0.051814	0.244297	0	0.0462597	0.239568	6	0.979537	4.75957	0.0414201	0.378782	FALSE	14.7633	0.00455674	0.0373904	TRUE	+				904	;P48643(IPI00010720)	GO:0005874;GO:0005737;GO:0005832;GO:0005730;GO:0005829;GO:0002199;GO:0005856;GO:0005815;GO:0005813	1;1;1;1;1;1;1;1;1	GO:0005524;GO:0000166;GO:0051082	1;1;1	GO:0006457;GO:0007339;GO:0009615;GO:0044267;GO:0051084	1;1;1;1;1	microtubule organizing center;zona pellucida receptor complex;centrosome;chaperonin-containing T-complex;cytoplasm;cytosol;nucleolus;cytoskeleton;microtubule	1;1;1;1;1;1;1;1;1	ATP binding;unfolded protein binding;nucleotide binding	1;1;1	protein folding;binding of sperm to zona pellucida;cellular protein metabolic process;response to virus;'de novo' posttranslational protein folding	1;1;1;1;1	P48643
919	IPI:IPI00010882.3;IPI:IPI00604566.3	DNA fragmentation factor subunit alpha;DNA fragmentation factor 45 kDa subunit;Inhibitor of CAD	DFFA;DFF1;DFF45;H13	Isoform DFF45 of DNA fragmentation factor subunit alpha (Fragment);Isoform DFF35 of DNA fragmentation factor subunit alpha (Fragment)	O00273-1;O00273;O00273-2	DFFA_HUMAN	2	8	8	8	28.1	28.1	36.521	331	0	0.0907325	0.530947	0	0.0944423	0.52856	6	0.987159	4.27575	0.050584	0.403104	FALSE	37.9127	0.00069499	0.0262713	TRUE	+				919	;O00273(IPI00010882;IPI00604566)	GO:0005737;GO:0005829;GO:0005654;GO:0005634;GO:0005622;GO:0000790	1;1;1;1;1;1	GO:0004536	1	GO:0006917;GO:0006915;GO:0043065;GO:0006309;GO:0035556;GO:0006921;GO:1900118	1;1;1;1;1;1;1	nucleoplasm;nucleus;nuclear chromatin;intracellular;cytoplasm;cytosol	1;1;1;1;1;1	deoxyribonuclease activity	1	intracellular signal transduction;cellular component disassembly involved in execution phase of apoptosis;negative regulation of execution phase of apoptosis;apoptotic process;positive regulation of apoptotic process;induction of apoptosis;apoptotic DNA fragmentation	1;1;1;1;1;1;1	O00273
933	IPI:IPI00011201.1	NAD-dependent malic enzyme, mitochondrial;Malic enzyme 2	ME2	NAD-dependent malic enzyme, mitochondrial	P23368	MAOM_HUMAN	2	32	32	32	61.3	61.3	65.443	584	0	0.0236484	0.315724	0	0.0568173	0.30869	6	0.997737	1.38727	0.299726	0.671838	FALSE	14.2436	0.00489289	0.0376153	TRUE	+				933	;P23368(IPI00011201)	GO:0005759;GO:0005739;GO:0043231	1;1;1	GO:0004471;GO:0016491;GO:0009055;GO:0016616;GO:0051287;GO:0003824;GO:0016619;GO:0046872;GO:0004470	1;1;1;1;1;1;1;1;1	GO:0008152;GO:0055114;GO:0006108	1;1;1	mitochondrion;mitochondrial matrix;intracellular membrane-bounded organelle	1;1;1	oxidoreductase activity, acting on the CH-OH group of donors, NAD or NADP as acceptor;catalytic activity;oxidoreductase activity;NAD binding;malic enzyme activity;electron carrier activity;malate dehydrogenase (oxaloacetate-decarboxylating) activity;malate dehydrogenase (decarboxylating) activity;metal ion binding	1;1;1;1;1;1;1;1;1	oxidation-reduction process;malate metabolic process;metabolic process	1;1;1	P23368
943	IPI:IPI00011302.1	CD59 glycoprotein;Membrane attack complex inhibition factor;MAC-inhibitory protein;Protectin;MEM43 antigen;Membrane inhibitor of reactive lysis;20 kDa homologous restriction factor;HRF-20;1F5 antigen	CD59;MIC11;MIN1;MIN2;MIN3;MSK21	CD59 glycoprotein	P13987	CD59_HUMAN	1	4	4	4	21.9	21.9	14.177	128	0	0.10328	0.529832	0	-0.000317603	0.537961	6	0.982953	-0.00292295	0.997933	0.998208	FALSE	17.2671	0.0033372	0.0347039	TRUE	+				943	;P13987(IPI00011302)	GO:0016020;GO:0005615;GO:0043218;GO:0031225;GO:0005576;GO:0005886;GO:0031362;GO:0009986;GO:0042383	1;1;1;1;1;1;1;1;1	GO:0005515;GO:0001848	1;1	GO:0007596;GO:0007166;GO:0030449;GO:0042102;GO:0045087;GO:0043066;GO:0001971	1;1;1;1;1;1;1	anchored to external side of plasma membrane;extracellular space;plasma membrane;compact myelin;sarcolemma;extracellular region;cell surface;anchored to membrane;membrane	1;1;1;1;1;1;1;1;1	complement binding;protein binding	1;1	regulation of complement activation;cell surface receptor signaling pathway;innate immune response;negative regulation of apoptotic process;negative regulation of activation of membrane attack complex;blood coagulation;positive regulation of T cell proliferation	1;1;1;1;1;1;1	P13987
958	IPI:IPI00011603.2	26S proteasome non-ATPase regulatory subunit 3;Proteasome subunit p58	PSMD3	26S proteasome non-ATPase regulatory subunit 3	O43242	PSMD3_HUMAN	1	30	30	30	54.1	54.1	60.977	534	0	0.00167723	0.222552	0	0.0187942	0.21761	6	0.999979	0.643174	0.58601	0.836353	FALSE	13.8702	0.00515781	0.0382233	TRUE	+				958	;O43242(IPI00011603)	GO:0000502;GO:0005829;GO:0005654;GO:0022624	1;1;1;1	GO:0030234	1	GO:0006915;GO:0042590;GO:0000278;GO:0006521;GO:0044281;GO:0016070;GO:0051436;GO:0031145;GO:0016071;GO:0000209;GO:0043066;GO:0016032;GO:0034641;GO:0042176;GO:0002479;GO:0000082;GO:0051439;GO:0002474;GO:0051437;GO:0010467;GO:0006977;GO:0042981	1;1;1;1;1;1;1;1;1;1;1;1;1;1;1;1;1;1;1;1;1;1	nucleoplasm;proteasome complex;cytosol;proteasome accessory complex	1;1;1;1	enzyme regulator activity	1	antigen processing and presentation of peptide antigen via MHC class I;mitotic cell cycle;anaphase-promoting complex-dependent proteasomal ubiquitin-dependent protein catabolic process;DNA damage response, signal transduction by p53 class mediator resulting in cell cycle arrest;positive regulation of ubiquitin-protein ligase activity involved in mitotic cell cycle;antigen processing and presentat…	1;1;1;1;1;1;1;1;1;1;1;1;1;1;1;1;1;1;1;1;1;1	O43242
985	IPI:IPI00011996.5;IPI:IPI00829749.1	Ubiquitin-conjugating enzyme E2 Z;Ubiquitin-protein ligase Z;Ubiquitin carrier protein Z;Uba6-specific E2 conjugating enzyme 1	UBE2Z;HOYS7	Isoform 1 of Ubiquitin-conjugating enzyme E2 Z;Isoform 2 of Ubiquitin-conjugating enzyme E2 Z	Q9H832-1;Q9H832;Q9H832-2	UBE2Z_HUMAN	2	3	3	3	10.2	10.2	38.21	354	0	0.00500367	0.452357	0	-0.0254331	0.432661	6	0.999954	-0.691379	0.560797	0.822909	FALSE	11.2908	0.00775319	0.0442336	TRUE	+				985	;Q9H832(IPI00829749;IPI00011996)	GO:0005737;GO:0005730;GO:0005634	1;1;1	GO:0005524;GO:0016874;GO:0000166;GO:0016881;GO:0004842	1;1;1;1;1	GO:0006915;GO:0016567	1;1	nucleus;cytoplasm;nucleolus	1;1;1	ATP binding;ubiquitin-protein ligase activity;nucleotide binding;ligase activity;acid-amino acid ligase activity	1;1;1;1;1	apoptotic process;protein ubiquitination	1;1	Q9H832
1028	IPI:IPI00012535.1	DnaJ homolog subfamily A member 1;Heat shock 40 kDa protein 4;DnaJ protein homolog 2;HDJ-2;HSJ-2;HSDJ	DNAJA1;DNAJ2;HDJ2;HSJ2;HSPF4	DnaJ homolog subfamily A member 1	P31689	DNJA1_HUMAN	1	17	16	16	53.7	53.7	44.868	397	0	0.258644	1.02088	0	0.22136	1.0132	6	0.969859	5.82159	0.0282616	0.357252	FALSE	66.2919	0.000227473	0.0189578	TRUE	+				1028	;P31689(IPI00012535)	GO:0016020	1	GO:0005524;GO:0031072;GO:0046872;GO:0051082;GO:0050750	1;1;1;1;1	GO:0006986;GO:0030521;GO:0007283;GO:0006457;GO:0030317;GO:0009408	1;1;1;1;1;1	membrane	1	unfolded protein binding;ATP binding;heat shock protein binding;low-density lipoprotein particle receptor binding;metal ion binding	1;1;1;1;1	protein folding;spermatogenesis;response to unfolded protein;androgen receptor signaling pathway;sperm motility;response to heat	1;1;1;1;1;1	P31689
1144	IPI:IPI00013894.1	Stress-induced-phosphoprotein 1;Hsc70/Hsp90-organizing protein;Transformation-sensitive protein IEF SSP 3521;NY-REN-11 antigen	STIP1	Stress-induced-phosphoprotein 1	P31948	STIP1_HUMAN	1	53	53	53	66.5	66.5	62.639	543	0	0.169201	0.638491	0	0.152055	0.63354	6	0.966742	8.75543	0.0127952	0.316271	FALSE	27.4968	0.00132	0.03031	TRUE	+				1144	;P31948(IPI00013894)	GO:0005737;GO:0005634;GO:0005794;GO:0043234	1;1;1;1	GO:0051087;GO:0005515;GO:0030544;GO:0008022	1;1;1;1	GO:0006950	1	nucleus;Golgi apparatus;protein complex;cytoplasm	1;1;1;1	Hsp70 protein binding;protein C-terminus binding;chaperone binding;protein binding	1;1;1;1	response to stress	1	P31948
1207	IPI:IPI00014577.1	Ras-related protein Rab-18	RAB18	Ras-related protein Rab-18	Q9NP72	RAB18_HUMAN	1	11	11	11	55.8	55.8	22.977	206	0	0.0651781	0.320485	0	0.106986	0.33706	6	0.981316	1.65283	0.240177	0.62674	FALSE	14.2778	0.0048696	0.0376153	TRUE	+				1207	;Q9NP72(IPI00014577)	GO:0016020;GO:0005886;GO:0005622	1;1;1	GO:0000166;GO:0019003;GO:0003924;GO:0005525	1;1;1;1	GO:0007420;GO:0015031;GO:0001654;GO:0006184;GO:0007275;GO:0007264;GO:0006897;GO:0006810	1;1;1;1;1;1;1;1	plasma membrane;intracellular;membrane	1;1;1	GDP binding;GTP binding;GTPase activity;nucleotide binding	1;1;1;1	protein transport;GTP catabolic process;eye development;transport;multicellular organismal development;endocytosis;small GTPase mediated signal transduction;brain development	1;1;1;1;1;1;1;1	Q9NP72
1228	IPI:IPI00015029.1	Prostaglandin E synthase 3;Cytosolic prostaglandin E2 synthase;Telomerase-binding protein p23;Progesterone receptor complex p23	PTGES3;P23;TEBP	Prostaglandin E synthase 3	Q15185	TEBP_HUMAN	1	6	6	6	36.9	36.9	18.697	160	0	-0.0425853	0.202116	0	-0.0408569	0.197574	6	0.986647	-8.70634	0.0129371	0.316271	FALSE	22.3992	0.00198718	0.0330512	TRUE	+				1228	;Q15185(IPI00015029)	GO:0000781;GO:0005737;GO:0005730;GO:0005829;GO:0005634;GO:0005697	1;1;1;1;1;1	GO:0003720;GO:0005515;GO:0016853;GO:0051082;GO:0050220	1;1;1;1;1	GO:0019371;GO:0019369;GO:0001516;GO:0070389;GO:0007165;GO:0006629;GO:0044281;GO:0006631;GO:0006633;GO:0006693;GO:0000723	1;1;1;1;1;1;1;1;1;1;1	chromosome, telomeric region;nucleus;telomerase holoenzyme complex;cytoplasm;cytosol;nucleolus	1;1;1;1;1;1	telomerase activity;unfolded protein binding;isomerase activity;prostaglandin-E synthase activity;protein binding	1;1;1;1;1	fatty acid metabolic process;telomere maintenance;fatty acid biosynthetic process;chaperone cofactor-dependent protein refolding;lipid metabolic process;arachidonic acid metabolic process;cyclooxygenase pathway;prostaglandin metabolic process;prostaglandin biosynthetic process;small molecule metabolic process;signal transduction	1;1;1;1;1;1;1;1;1;1;1	Q15185
1252	IPI:IPI00015602.1	Mitochondrial import receptor subunit TOM70;Mitochondrial precursor proteins import receptor;Translocase of outer membrane 70 kDa subunit	TOMM70A;KIAA0719	Mitochondrial import receptor subunit TOM70	O94826	TOM70_HUMAN	1	23	23	23	44.9	44.9	67.454	608	0	0.0335668	0.264406	0	0.0662132	0.273645	6	0.99318	1.15975	0.36589	0.718237	FALSE	17.7924	0.00314396	0.0347039	TRUE	+				1252	;O94826(IPI00015602)	GO:0016020;GO:0005741;GO:0016021;GO:0005739;GO:0005742	1;1;1;1;1	GO:0008320;GO:0005515	1;1	GO:0044267;GO:0006626	1;1	mitochondrion;mitochondrial outer membrane;integral to membrane;mitochondrial outer membrane translocase complex;membrane	1;1;1;1;1	protein transmembrane transporter activity;protein binding	1;1	protein targeting to mitochondrion;cellular protein metabolic process	1;1	O94826
1274	IPI:IPI00015897.2	Cysteine and histidine-rich domain-containing protein 1;CHORD domain-containing protein 1	CHORDC1;CHP1	Isoform 1 of Cysteine and histidine-rich domain-containing protein 1;Isoform 2 of Cysteine and histidine-rich domain-containing protein 1	Q9UHD1-1;Q9UHD1;Q9UHD1-2	CHRD1_HUMAN	2	22	22	22	71.7	71.7	37.489	332	0	0.197811	0.892807	0	0.167118	0.87996	6	0.977502	3.70467	0.0657568	0.427281	FALSE	29.1692	0.00117324	0.0302484	TRUE	+				1274	;Q9UHD1(IPI00015897)	GO:0005575	1	GO:0051879;GO:0005515;GO:0008270;GO:0046872	1;1;1;1	GO:0061077;GO:0080134;GO:0010824;GO:0006950;GO:2000299;GO:1900034	1;1;1;1;1;1	cellular_component	1	Hsp90 protein binding;protein binding;zinc ion binding;metal ion binding	1;1;1;1	regulation of centrosome duplication;chaperone-mediated protein folding;response to stress;negative regulation of Rho-dependent protein serine/threonine kinase activity;regulation of response to stress;regulation of cellular response to heat	1;1;1;1;1;1	Q9UHD1
1276	IPI:IPI00015911.2	Dihydrolipoyl dehydrogenase, mitochondrial;Dihydrolipoamide dehydrogenase;Glycine cleavage system L protein	DLD;GCSL;LAD;PHE3	Dihydrolipoyl dehydrogenase, mitochondrial	P09622	DLDH_HUMAN	1	15	15	15	36.1	36.1	54.177	509	0	0.0149339	0.20256	0	0.0167586	0.207113	6	0.99781	2.71891	0.112834	0.522744	FALSE	20.3784	0.00239935	0.0330684	TRUE	+				1276	;P09622(IPI00015911)	GO:0005759;GO:0005929;GO:0043159;GO:0005730;GO:0005739;GO:0005634	1;1;1;1;1;1	GO:0004148;GO:0050660;GO:0016668;GO:0016491	1;1;1;1	GO:0010510;GO:0045454;GO:0044237;GO:0007369;GO:0006090;GO:0006508;GO:0034641;GO:0048240;GO:0055114;GO:0044281;GO:0006099;GO:0006120;GO:0042391;GO:0009083;GO:0006554	1;1;1;1;1;1;1;1;1;1;1;1;1;1;1	mitochondrion;nucleus;acrosomal matrix;mitochondrial matrix;cilium;nucleolus	1;1;1;1;1;1	oxidoreductase activity;oxidoreductase activity, acting on a sulfur group of donors, NAD(P) as acceptor;dihydrolipoyl dehydrogenase activity;flavin adenine dinucleotide binding	1;1;1;1	oxidation-reduction process;cell redox homeostasis;proteolysis;regulation of acetyl-CoA biosynthetic process from pyruvate;tricarboxylic acid cycle;regulation of membrane potential;mitochondrial electron transport, NADH to ubiquinone;pyruvate metabolic process;cellular nitrogen compound metabolic process;sperm capacitation;cellular metabolic process;lysine catabolic process;small molecule metabol…	1;1;1;1;1;1;1;1;1;1;1;1;1;1;1	P09622
1298	IPI:IPI00016339.4	Ras-related protein Rab-5C;RAB5L;L1880	RAB5C;RABL	Ras-related protein Rab-5C	P51148	RAB5C_HUMAN	1	8	8	5	44.9	30.1	23.482	216	0	0.0373477	0.302829	0	0.044109	0.307094	6	0.993584	3.30757	0.0805213	0.450373	FALSE	23.4476	0.00181393	0.0330512	TRUE	+				1298	;P51148(IPI00016339)	GO:0016020;GO:0042470;GO:0005886;GO:0005768;GO:0031901;GO:0030139;GO:0005811	1;1;1;1;1;1;1	GO:0000166;GO:0019003;GO:0003924;GO:0005525	1;1;1;1	GO:0015031;GO:0006184;GO:0030100;GO:0007264;GO:0006810;GO:0007032	1;1;1;1;1;1	plasma membrane;melanosome;early endosome membrane;endosome;endocytic vesicle;lipid particle;membrane	1;1;1;1;1;1;1	GDP binding;GTP binding;GTPase activity;nucleotide binding	1;1;1;1	protein transport;GTP catabolic process;transport;endosome organization;regulation of endocytosis;small GTPase mediated signal transduction	1;1;1;1;1;1	P51148
1299	IPI:IPI00016342.1	Ras-related protein Rab-7a	RAB7A;RAB7	Ras-related protein Rab-7a	P51149	RAB7A_HUMAN	1	15	15	15	75.4	75.4	23.489	207	0	0.0617456	0.296575	0	0.033814	0.293035	6	0.980344	1.14772	0.369846	0.720528	FALSE	29.0691	0.00118132	0.0302484	TRUE	+				1299	;P51149(IPI00016342)	GO:0016020;GO:0005770;GO:0031410;GO:0042470;GO:0005737;GO:0045335;GO:0005765;GO:0043231;GO:0005764;GO:0030670;GO:0097208;GO:0005768;GO:0005794	1;1;1;1;1;1;1;1;1;1;1;1;1	GO:0048365;GO:0005515;GO:0000166;GO:0019003;GO:0003924;GO:0005525	1;1;1;1;1;1	GO:0015031;GO:0006622;GO:0006184;GO:0007174;GO:0045022;GO:0090382;GO:0090385;GO:0090383;GO:0007264;GO:0006897;GO:0008333;GO:0006810;GO:0045453;GO:0019886	1;1;1;1;1;1;1;1;1;1;1;1;1;1	late endosome;melanosome;lysosome;endosome;phagocytic vesicle membrane;intracellular membrane-bounded organelle;alveolar lamellar body;Golgi apparatus;lysosomal membrane;phagocytic vesicle;cytoplasm;cytoplasmic vesicle;membrane	1;1;1;1;1;1;1;1;1;1;1;1;1	GDP binding;GTP binding;Rac GTPase binding;GTPase activity;nucleotide binding;protein binding	1;1;1;1;1;1	epidermal growth factor catabolic process;phagosome maturation;protein transport;antigen processing and presentation of exogenous peptide antigen via MHC class II;phagosome acidification;endosome to lysosome transport;early endosome to late endosome transport;GTP catabolic process;phagosome-lysosome fusion;transport;bone resorption;protein targeting to lysosome;endocytosis;small GTPase mediated s…	1;1;1;1;1;1;1;1;1;1;1;1;1;1	P51149
1322	IPI:IPI00016608.1	Transmembrane emp24 domain-containing protein 2	TMED2;RNP24	Transmembrane emp24 domain-containing protein 2	Q15363	TMED2_HUMAN	1	4	4	4	30.8	30.8	22.761	201	0	0.0778738	0.309158	0	0.0660116	0.301846	6	0.970239	4.98653	0.0379422	0.377614	FALSE	12.7314	0.00611291	0.0409917	TRUE	+				1322	;Q15363(IPI00016608)	GO:0016020;GO:0005783;GO:0032580;GO:0031410;GO:0030137;GO:0033116;GO:0030663;GO:0016021;GO:0030659;GO:0043231;GO:0005793;GO:0042589;GO:0005794;GO:0005789	1;1;1;1;1;1;1;1;1;1;1;1;1;1	GO:0005515	1	GO:0072661;GO:0048208;GO:0035459;GO:0048205;GO:0015031;GO:0001893;GO:0006886;GO:0034260;GO:0048598;GO:0016192;GO:0006810;GO:0007030;GO:0006888	1;1;1;1;1;1;1;1;1;1;1;1;1	cytoplasmic vesicle membrane;endoplasmic reticulum-Golgi intermediate compartment;COPI-coated vesicle membrane;endoplasmic reticulum-Golgi intermediate compartment membrane;COPI-coated vesicle;Golgi cisterna membrane;integral to membrane;endoplasmic reticulum membrane;intracellular membrane-bounded organelle;Golgi apparatus;endoplasmic reticulum;cytoplasmic vesicle;zymogen granule membrane;membra…	1;1;1;1;1;1;1;1;1;1;1;1;1;1	protein binding	1	maternal placenta development;intracellular protein transport;COPI coating of Golgi vesicle;protein transport;COPII vesicle coating;protein targeting to plasma membrane;embryonic morphogenesis;vesicle-mediated transport;ER to Golgi vesicle-mediated transport;Golgi organization;transport;negative regulation of GTPase activity;cargo loading into vesicle	1;1;1;1;1;1;1;1;1;1;1;1;1	Q15363
1368	IPI:IPI00017375.2	Protein transport protein Sec23A;SEC23-related protein A	SEC23A	Protein transport protein Sec23A	Q15436	SC23A_HUMAN	1	14	12	12	29.3	26.4	86.16	765	0	-0.0691364	0.248093	0	-0.0583662	0.256067	6	0.978294	-0.561565	0.630945	0.85939	FALSE	20.6416	0.00233876	0.0330512	TRUE	+				1368	;Q15436(IPI00017375)	GO:0016020;GO:0005783;GO:0000139;GO:0005829;GO:0048471;GO:0005794;GO:0030127;GO:0005789;GO:0030868;GO:0012507	1;1;1;1;1;1;1;1;1;1	GO:0005515;GO:0008270	1;1	GO:0048208;GO:0015031;GO:0044281;GO:0006810;GO:0019886;GO:0043687;GO:0044267;GO:0006886;GO:0016044;GO:0016192;GO:0002474;GO:0018279;GO:0006888	1;1;1;1;1;1;1;1;1;1;1;1;1	ER to Golgi transport vesicle membrane;Golgi membrane;COPII vesicle coat;endoplasmic reticulum membrane;smooth endoplasmic reticulum membrane;Golgi apparatus;endoplasmic reticulum;perinuclear region of cytoplasm;cytosol;membrane	1;1;1;1;1;1;1;1;1;1	protein binding;zinc ion binding	1;1	antigen processing and presentation of peptide antigen via MHC class I;intracellular protein transport;COPII vesicle coating;cellular membrane organization;vesicle-mediated transport;ER to Golgi vesicle-mediated transport;transport;small molecule metabolic process;cellular protein metabolic process;post-translational protein modification;protein transport;antigen processing and presentation of ex…	1;1;1;1;1;1;1;1;1;1;1;1;1	Q15436
1369	IPI:IPI00017376.2	Protein transport protein Sec23B;SEC23-related protein B	SEC23B	Protein transport protein Sec23B	Q15437	SC23B_HUMAN	1	18	18	16	29.1	26.2	86.478	767	0	0.0393347	0.213125	0	0.0436547	0.220443	6	0.984849	0.747201	0.532845	0.803733	FALSE	12.2257	0.00662401	0.0422682	TRUE	+				1369	;Q15437(IPI00017376)	GO:0016020;GO:0005783;GO:0033116;GO:0000139;GO:0043231;GO:0048471;GO:0005794;GO:0030127;GO:0005789	1;1;1;1;1;1;1;1;1	GO:0008270	1	GO:0015031;GO:0006810;GO:0006886;GO:0016192;GO:0006888	1;1;1;1;1	endoplasmic reticulum-Golgi intermediate compartment membrane;Golgi membrane;COPII vesicle coat;endoplasmic reticulum membrane;intracellular membrane-bounded organelle;Golgi apparatus;endoplasmic reticulum;perinuclear region of cytoplasm;membrane	1;1;1;1;1;1;1;1;1	zinc ion binding	1	intracellular protein transport;vesicle-mediated transport;ER to Golgi vesicle-mediated transport;transport;protein transport	1;1;1;1;1	Q15437
1376	IPI:IPI00017469.1	Sepiapterin reductase	SPR	Sepiapterin reductase	P35270	SPRE_HUMAN	2	11	11	11	50.6	50.6	28.048	261	0	0.0816815	0.684527	0	0.0866384	0.700763	6	0.994016	4.80259	0.0407257	0.378782	FALSE	25.4611	0.00153901	0.0318696	TRUE	+				1376	;P35270(IPI00017469)	GO:0005737;GO:0005730;GO:0005829;GO:0005634	1;1;1;1	GO:0004757;GO:0016491;GO:0050661;GO:0004033	1;1;1;1	GO:0008152;GO:0055114;GO:0044281;GO:0050999;GO:0046209;GO:0006729;GO:0006809	1;1;1;1;1;1;1	nucleus;cytoplasm;cytosol;nucleolus	1;1;1;1	sepiapterin reductase activity;oxidoreductase activity;aldo-keto reductase (NADP) activity;NADP binding	1;1;1;1	oxidation-reduction process;small molecule metabolic process;nitric oxide metabolic process;tetrahydrobiopterin biosynthetic process;regulation of nitric-oxide synthase activity;metabolic process;nitric oxide biosynthetic process	1;1;1;1;1;1;1	P35270
1387	IPI:IPI00017704.3	Coactosin-like protein	COTL1;CLP	Coactosin-like protein	Q14019	COTL1_HUMAN	1	10	10	10	63.4	63.4	15.945	142	0	0.0312276	0.22168	0	0.0273076	0.233416	6	0.991498	0.623926	0.596355	0.840429	FALSE	12.4231	0.00641722	0.0419194	TRUE	+				1387	;Q14019(IPI00017704)	GO:0016020;GO:0005737;GO:0005575;GO:0005856;GO:0005634;GO:0031965;GO:0005622	1;1;1;1;1;1;1	GO:0005515;GO:0003779;GO:0019899	1;1;1	GO:0008150;GO:0050832	1;1	nucleus;intracellular;cytoplasm;nuclear membrane;cytoskeleton;cellular_component;membrane	1;1;1;1;1;1;1	enzyme binding;actin binding;protein binding	1;1;1	defense response to fungus;biological_process	1;1	Q14019
1408	IPI:IPI00018188.3	Adaptin ear-binding coat-associated protein 2;NECAP endocytosis-associated protein 2	NECAP2	Isoform 1 of Adaptin ear-binding coat-associated protein 2;Isoform 2 of Adaptin ear-binding coat-associated protein 2;cDNA FLJ52763, highly similar to Adaptin ear-binding coat-associated protein 2	Q9NVZ3-1;Q9NVZ3;Q9NVZ3-2;Q9NVZ3-3	NECP2_HUMAN	3	3	3	3	19.8	19.8	28.338	263	0	0.136012	0.860675	0	0.142111	0.860233	6	0.989139	6.491	0.0229214	0.356422	FALSE	12.349	0.00649363	0.0420625	TRUE	+				1408	;Q9NVZ3(IPI00018188)	GO:0016020;GO:0031410;GO:0030665;GO:0005886;GO:0030125;GO:0005622;GO:0005905	1;1;1;1;1;1;1			GO:0015031;GO:0006810;GO:0006897	1;1;1	clathrin vesicle coat;plasma membrane;clathrin-coated vesicle membrane;intracellular;coated pit;cytoplasmic vesicle;membrane	1;1;1;1;1;1;1			transport;protein transport;endocytosis	1;1;1	Q9NVZ3
1437	IPI:IPI00018465.1	T-complex protein 1 subunit eta;CCT-eta;HIV-1 Nef-interacting protein	CCT7;CCTH;NIP7-1	T-complex protein 1 subunit eta	Q99832	TCPH_HUMAN	1	46	46	46	83.2	83.2	59.366	543	0	0.0175824	0.25409	0	0.0259825	0.245451	6	0.998079	2.68545	0.115193	0.524563	FALSE	17.4832	0.0032556	0.0347039	TRUE	+				1437	;Q99832(IPI00018465)	GO:0005874;GO:0005737;GO:0005832;GO:0005829;GO:0005739;GO:0002199	1;1;1;1;1;1	GO:0005524;GO:0000166;GO:0042802;GO:0051082	1;1;1;1	GO:0006457;GO:0007339;GO:0044267;GO:0051084	1;1;1;1	mitochondrion;zona pellucida receptor complex;chaperonin-containing T-complex;cytoplasm;cytosol;microtubule	1;1;1;1;1;1	ATP binding;identical protein binding;unfolded protein binding;nucleotide binding	1;1;1;1	protein folding;binding of sperm to zona pellucida;cellular protein metabolic process;'de novo' posttranslational protein folding	1;1;1;1	Q99832
1487	IPI:IPI00019427.4;IPI:IPI00215762.7	Exocyst complex component 1;Exocyst complex component Sec3	EXOC1;SEC3;SEC3L1;BM-012	Isoform 1 of Exocyst complex component 1;Isoform 2 of Exocyst complex component 1	Q9NV70-1;Q9NV70;Q9NV70-2	EXOC1_HUMAN	2	11	11	11	13.9	13.9	101.98	894	0	0.00433539	0.449685	0	0.0196673	0.41439	6	0.999965	0.430938	0.708514	0.893319	FALSE	10.9168	0.00828671	0.0454152	TRUE	+				1487	;Q9NV70(IPI00019427;IPI00215762)	GO:0000145;GO:0005886	1;1			GO:0015031;GO:0006810;GO:0044267;GO:0016044;GO:0006887	1;1;1;1;1	plasma membrane;exocyst	1;1			cellular membrane organization;transport;cellular protein metabolic process;protein transport;exocytosis	1;1;1;1;1	Q9NV70
1502	IPI:IPI00019755.3	Glutathione S-transferase omega-1;GSTO 1-1	GSTO1;GSTTLP28	Glutathione S-transferase omega-1	P78417	GSTO1_HUMAN	1	17	17	17	69.7	69.7	27.566	241	0	0.0401401	0.264164	0	0.0558918	0.260041	6	0.990011	2.32168	0.145967	0.554589	FALSE	61.876	0.000261087	0.0194783	TRUE	+				1502	;P78417(IPI00019755)	GO:0005737;GO:0005829	1;1	GO:0016491;GO:0004364;GO:0050610;GO:0016740;GO:0045174	1;1;1;1;1	GO:0008152;GO:0055114;GO:0044281;GO:0010880;GO:0010881;GO:0006805;GO:0014810;GO:0060315;GO:0019852;GO:0071243;GO:0060316;GO:1901687;GO:0042178	1;1;1;1;1;1;1;1;1;1;1;1;1	cytoplasm;cytosol	1;1	methylarsonate reductase activity;transferase activity;glutathione transferase activity;oxidoreductase activity;glutathione dehydrogenase (ascorbate) activity	1;1;1;1;1	oxidation-reduction process;positive regulation of skeletal muscle contraction by regulation of release of sequestered calcium ion;regulation of cardiac muscle contraction by regulation of the release of sequestered calcium ion;cellular response to arsenic-containing substance;small molecule metabolic process;negative regulation of ryanodine-sensitive calcium-release channel activity;L-ascorbic a…	1;1;1;1;1;1;1;1;1;1;1;1;1	P78417
1570	IPI:IPI00020602.1	Casein kinase II subunit alpha'	CSNK2A2;CK2A2	Casein kinase II subunit alpha'	P19784	CSK22_HUMAN	1	17	16	16	54.6	52.9	41.213	350	0	0.0382328	0.172377	0	0.0347507	0.17536	6	0.977449	8.14099	0.0147554	0.332949	FALSE	10.1107	0.00964092	0.0487708	TRUE	+				1570	;P19784(IPI00020602)	GO:0005829;GO:0005634;GO:0031519	1;1;1	GO:0005524;GO:0047485;GO:0005515;GO:0004672;GO:0000166;GO:0016301;GO:0004674;GO:0016740;GO:0016772	1;1;1;1;1;1;1;1;1	GO:0006915;GO:0016055;GO:0051726;GO:0000278;GO:0006351;GO:0016310;GO:0007411;GO:0071174;GO:0006468;GO:0006355;GO:0007049	1;1;1;1;1;1;1;1;1;1;1	nucleus;PcG protein complex;cytosol	1;1;1	transferase activity;transferase activity, transferring phosphorus-containing groups;ATP binding;protein N-terminus binding;protein serine/threonine kinase activity;protein kinase activity;nucleotide binding;protein binding;kinase activity	1;1;1;1;1;1;1;1;1	mitotic cell cycle;Wnt receptor signaling pathway;transcription, DNA-dependent;apoptotic process;regulation of cell cycle;protein phosphorylation;regulation of transcription, DNA-dependent;axon guidance;mitotic spindle checkpoint;cell cycle;phosphorylation	1;1;1;1;1;1;1;1;1;1;1	P19784
1575	IPI:IPI00020887.3	Vesicle-associated membrane protein 7;Synaptobrevin-like protein 1;Tetanus-insensitive VAMP	VAMP7;SYBL1	Isoform 1 of Vesicle-associated membrane protein 7;Isoform 3 of Vesicle-associated membrane protein 7;Isoform 2 of Vesicle-associated membrane protein 7	P51809-1;P51809;P51809-3;P51809-2	VAMP7_HUMAN	3	6	6	6	28.2	28.2	24.935	220	0	0.105991	0.464474	0	0.105495	0.446168	6	0.97601	4.10713	0.0544825	0.408619	FALSE	12.681	0.00616115	0.0410427	TRUE	+				1575	;P51809(IPI00020887)	GO:0030658;GO:0016020;GO:0005783;GO:0031410;GO:0030054;GO:0005737;GO:0045335;GO:0016021;GO:0045202;GO:0005886;GO:0005765;GO:0043231;GO:0031902;GO:0005764;GO:0030670;GO:0048471;GO:0043005;GO:0005768;GO:0005794;GO:0031201;GO:0005789;GO:0045177	1;1;1;1;1;1;1;1;1;1;1;1;1;1;1;1;1;1;1;1;1;1	GO:0005515;GO:0019905	1;1	GO:0048280;GO:0015031;GO:0043308;GO:1900483;GO:0000046;GO:0034197;GO:0006911;GO:0008333;GO:0006810;GO:0006906;GO:0043001;GO:0016044;GO:0017156;GO:0016192;GO:0043312;GO:0006892;GO:0006888;GO:0006887	1;1;1;1;1;1;1;1;1;1;1;1;1;1;1;1;1;1	transport vesicle membrane;apical part of cell;late endosome membrane;neuron projection;integral to membrane;cell junction;plasma membrane;endoplasmic reticulum membrane;lysosome;endosome;phagocytic vesicle membrane;intracellular membrane-bounded organelle;Golgi apparatus;endoplasmic reticulum;lysosomal membrane;perinuclear region of cytoplasm;phagocytic vesicle;cytoplasm;SNARE complex;cytoplasmi…	1;1;1;1;1;1;1;1;1;1;1;1;1;1;1;1;1;1;1;1;1;1	protein binding;syntaxin binding	1;1	endosome to lysosome transport;vesicle fusion with Golgi apparatus;cellular membrane organization;vesicle-mediated transport;ER to Golgi vesicle-mediated transport;transport;triglyceride transport;vesicle fusion;post-Golgi vesicle-mediated transport;calcium ion-dependent exocytosis;phagocytosis, engulfment;Golgi to plasma membrane protein transport;protein transport;exocytosis;regulation of prote…	1;1;1;1;1;1;1;1;1;1;1;1;1;1;1;1;1;1	P51809
1617	IPI:IPI00021440.1	Actin, cytoplasmic 2;Gamma-actin;Actin, cytoplasmic 2, N-terminally processed	ACTG1;ACTB;ACTG	Actin, cytoplasmic 2	P63261	ACTG_HUMAN	1	45	45	1	85.3	4.5	41.792	375	0	0.0144747	0.132481	0	0.0176845	0.138237	6	0.995028	1.54576	0.262197	0.643042	FALSE	14.9634	0.00443654	0.0373904	TRUE	+				1617	;P63261(IPI00021440)	GO:0030016;GO:0005737;GO:0005829;GO:0015629;GO:0070062;GO:0005856;GO:0031941	1;1;1;1;1;1;1	GO:0005524;GO:0005515;GO:0000166;GO:0042802;GO:0005200	1;1;1;1;1	GO:0045216;GO:0034332;GO:0045214;GO:0034329;GO:0007411;GO:0045087;GO:0016044;GO:0006928;GO:0038096	1;1;1;1;1;1;1;1;1	filamentous actin;myofibril;actin cytoskeleton;cytoplasm;cytosol;extracellular vesicular exosome;cytoskeleton	1;1;1;1;1;1;1	structural constituent of cytoskeleton;ATP binding;identical protein binding;nucleotide binding;protein binding	1;1;1;1;1	cellular membrane organization;adherens junction organization;axon guidance;innate immune response;sarcomere organization;cell-cell junction organization;cell junction assembly;cellular component movement;Fc-gamma receptor signaling pathway involved in phagocytosis	1;1;1;1;1;1;1;1;1	P63261
1643	IPI:IPI00021831.1	cAMP-dependent protein kinase type I-alpha regulatory subunit;Tissue-specific extinguisher 1	PRKAR1A;PKR1;PRKAR1;TSE1	cAMP-dependent protein kinase type I-alpha regulatory subunit	P10644	KAP0_HUMAN	1	14	14	11	38.6	32.8	42.981	381	0	0.261077	0.976595	0	0.21548	0.906356	6	0.966097	4.11737	0.0542335	0.408465	FALSE	11.7662	0.00714581	0.0433664	TRUE	+				1643	;P10644(IPI00021831)	GO:0031588;GO:0016020;GO:0031594;GO:0005737;GO:0005829;GO:0005886;GO:0005952;GO:0043234	1;1;1;1;1;1;1;1	GO:0030552;GO:0031625;GO:0005515;GO:0000166;GO:0008603;GO:0004862;GO:0034236	1;1;1;1;1;1;1	GO:0007596;GO:0048011;GO:0050796;GO:0008543;GO:0007165;GO:0007507;GO:0044281;GO:0001707;GO:2000480;GO:0045214;GO:0006469;GO:0007143;GO:0045859;GO:0045835;GO:0006112;GO:0007173;GO:0045087;GO:0071377;GO:0007202;GO:0034199;GO:0006833;GO:0035556;GO:0001932;GO:0060038;GO:0006357;GO:0055085	1;1;1;1;1;1;1;1;1;1;1;1;1;1;1;1;1;1;1;1;1;1;1;1;1;1	AMP-activated protein kinase complex;cAMP-dependent protein kinase complex;plasma membrane;protein complex;cytoplasm;cytosol;neuromuscular junction;membrane	1;1;1;1;1;1;1;1	ubiquitin protein ligase binding;cAMP binding;cAMP-dependent protein kinase inhibitor activity;nucleotide binding;protein binding;protein kinase A catalytic subunit binding;cAMP-dependent protein kinase regulator activity	1;1;1;1;1;1;1	energy reserve metabolic process;negative regulation of meiosis;activation of protein kinase A activity;water transport;intracellular signal transduction;activation of phospholipase C activity;cellular response to glucagon stimulus;neurotrophin TRK receptor signaling pathway;regulation of protein kinase activity;small molecule metabolic process;negative regulation of cAMP-dependent protein kinase…	1;1;1;1;1;1;1;1;1;1;1;1;1;1;1;1;1;1;1;1;1;1;1;1;1;1	P10644
1652	IPI:IPI00021985.4	Transmembrane 9 superfamily member 4	TM9SF4;KIAA0255	Transmembrane 9 superfamily member 4	Q92544	TM9S4_HUMAN	1	7	7	7	13.1	13.1	74.518	642	0	0.0670081	0.480323	0	0.00475471	0.498848	6	0.991671	0.0716286	0.949416	0.982107	FALSE	22.3101	0.00200305	0.0330512	TRUE	+				1652	;Q92544(IPI00021985)	GO:0016020;GO:0016021	1;1					integral to membrane;membrane	1;1					Q92544
1771	IPI:IPI00023510.1	Ras-related protein Rab-5A	RAB5A;RAB5	Ras-related protein Rab-5A	P20339	RAB5A_HUMAN	1	7	4	4	36.3	21.4	23.658	215	0	-0.0512457	0.153236	0	-0.00189436	0.162283	6	0.970568	-0.0217666	0.98461	0.993254	FALSE	14.7219	0.00458225	0.0374361	TRUE	+				1771	;P20339(IPI00023510)	GO:0010008;GO:0016020;GO:0042995;GO:0031410;GO:0016023;GO:0042470;GO:0005737;GO:0015629;GO:0005886;GO:0005769;GO:0005768;GO:0001726;GO:0031901;GO:0030139;GO:0045121	1;1;1;1;1;1;1;1;1;1;1;1;1;1;1	GO:0005515;GO:0000166;GO:0019003;GO:0003924;GO:0019001;GO:0005525	1;1;1;1;1;1	GO:0007596;GO:0015031;GO:0006184;GO:0007399;GO:0045921;GO:0007264;GO:0006810;GO:0051489;GO:0030154;GO:2000286;GO:0006897	1;1;1;1;1;1;1;1;1;1;1	membrane raft;plasma membrane;melanosome;cell projection;early endosome membrane;endosome;endocytic vesicle;actin cytoskeleton;early endosome;cytoplasm;cytoplasmic vesicle;endosome membrane;cytoplasmic membrane-bounded vesicle;membrane;ruffle	1;1;1;1;1;1;1;1;1;1;1;1;1;1;1	guanyl nucleotide binding;GDP binding;GTP binding;GTPase activity;nucleotide binding;protein binding	1;1;1;1;1;1	cell differentiation;GTP catabolic process;nervous system development;transport;protein transport;positive regulation of exocytosis;regulation of filopodium assembly;blood coagulation;endocytosis;small GTPase mediated signal transduction;receptor internalization involved in canonical Wnt receptor signaling pathway	1;1;1;1;1;1;1;1;1;1;1	P20339
1810	IPI:IPI00024067.4;IPI:IPI00455383.4	Clathrin heavy chain 1;CLH-17	CLTC;CLH17;CLTCL2;KIAA0034	Isoform 1 of Clathrin heavy chain 1;Isoform 2 of Clathrin heavy chain 1	Q00610-1;Q00610;Q00610-2	CLH1_HUMAN	2	85	85	64	52.3	41.1	191.61	1675	0	0.0330806	0.153771	0	0.0166123	0.15255	6	0.978896	0.623271	0.59671	0.840429	FALSE	12.8209	0.00602868	0.0409707	TRUE	+				1810	;Q00610(IPI00455383;IPI00024067)	GO:0016020;GO:0030130;GO:0031410;GO:0042470;GO:0030669;GO:0032588;GO:0005829;GO:0005819;GO:0005739;GO:0030659;GO:0070062;GO:0030136;GO:0030118;GO:0030132;GO:0030117;GO:0005905	1;1;1;1;1;1;1;1;1;1;1;1;1;1;1;1	GO:0005515;GO:0005198	1;1	GO:0031623;GO:0007067;GO:0033572;GO:0019886;GO:0006886;GO:0006898;GO:0016044;GO:0016192;GO:0006892	1;1;1;1;1;1;1;1;1	cytoplasmic vesicle membrane;mitochondrion;clathrin-coated endocytic vesicle membrane;clathrin-coated vesicle;melanosome;clathrin coat of trans-Golgi network vesicle;spindle;clathrin coat;membrane coat;coated pit;cytosol;cytoplasmic vesicle;extracellular vesicular exosome;clathrin coat of coated pit;membrane;trans-Golgi network membrane	1;1;1;1;1;1;1;1;1;1;1;1;1;1;1;1	protein binding;structural molecule activity	1;1	intracellular protein transport;cellular membrane organization;vesicle-mediated transport;transferrin transport;receptor-mediated endocytosis;receptor internalization;mitosis;post-Golgi vesicle-mediated transport;antigen processing and presentation of exogenous peptide antigen via MHC class II	1;1;1;1;1;1;1;1;1	Q00610
1852	IPI:IPI00024661.5	Protein transport protein Sec24C;SEC24-related protein C	SEC24C;KIAA0079	Protein transport protein Sec24C	P53992	SC24C_HUMAN	1	25	24	23	30.6	28.7	118.32	1094	0	0.0142337	0.252506	0	0.016404	0.266141	6	0.998741	1.67356	0.236191	0.624656	FALSE	17.2599	0.00333998	0.0347039	TRUE	+				1852	;P53992(IPI00024661)	GO:0016020;GO:0005783;GO:0005737;GO:0000139;GO:0005730;GO:0005829;GO:0043231;GO:0005634;GO:0048471;GO:0030127;GO:0005794;GO:0005789;GO:0012507	1;1;1;1;1;1;1;1;1;1;1;1;1	GO:0003674;GO:0005515;GO:0008270	1;1;1	GO:0048208;GO:0015031;GO:0044281;GO:0006810;GO:0019886;GO:0043687;GO:0044267;GO:0006886;GO:0016044;GO:0002474;GO:0016192;GO:0018279;GO:0006888	1;1;1;1;1;1;1;1;1;1;1;1;1	ER to Golgi transport vesicle membrane;Golgi membrane;COPII vesicle coat;nucleus;endoplasmic reticulum membrane;intracellular membrane-bounded organelle;Golgi apparatus;endoplasmic reticulum;perinuclear region of cytoplasm;cytoplasm;cytosol;nucleolus;membrane	1;1;1;1;1;1;1;1;1;1;1;1;1	protein binding;molecular_function;zinc ion binding	1;1;1	antigen processing and presentation of peptide antigen via MHC class I;intracellular protein transport;COPII vesicle coating;cellular membrane organization;vesicle-mediated transport;ER to Golgi vesicle-mediated transport;transport;small molecule metabolic process;cellular protein metabolic process;post-translational protein modification;protein transport;antigen processing and presentation of ex…	1;1;1;1;1;1;1;1;1;1;1;1;1	P53992
1854	IPI:IPI00024664.1;IPI:IPI00375145.1	Ubiquitin carboxyl-terminal hydrolase 5;Ubiquitin thioesterase 5;Ubiquitin-specific-processing protease 5;Deubiquitinating enzyme 5;Isopeptidase T	USP5;ISOT	Isoform Long of Ubiquitin carboxyl-terminal hydrolase 5;Isoform Short of Ubiquitin carboxyl-terminal hydrolase 5	P45974-1;P45974;P45974-2	UBP5_HUMAN	2	18	18	16	28.2	26.9	95.785	858	0	0.0111048	0.352578	0	0.0174808	0.347228	6	0.999616	0.710729	0.550957	0.818171	FALSE	29.3841	0.00115617	0.0302484	TRUE	+				1854	;P45974(IPI00375145;IPI00024664)	GO:0005764	1	GO:0008233;GO:0016787;GO:0005515;GO:0008234;GO:0008270;GO:0004221;GO:0046872;GO:0004197;GO:0008242	1;1;1;1;1;1;1;1;1	GO:0032436;GO:0071108;GO:0006511;GO:0006508	1;1;1;1	lysosome	1	cysteine-type peptidase activity;omega peptidase activity;peptidase activity;hydrolase activity;ubiquitin thiolesterase activity;cysteine-type endopeptidase activity;protein binding;zinc ion binding;metal ion binding	1;1;1;1;1;1;1;1;1	protein K48-linked deubiquitination;positive regulation of proteasomal ubiquitin-dependent protein catabolic process;proteolysis;ubiquitin-dependent protein catabolic process	1;1;1;1	P45974
1874	IPI:IPI00024919.3	Thioredoxin-dependent peroxide reductase, mitochondrial;Peroxiredoxin-3;PRX III;Antioxidant protein 1;Protein MER5 homolog;HBC189	PRDX3;AOP1	Thioredoxin-dependent peroxide reductase, mitochondrial	P30048	PRDX3_HUMAN	1	11	11	11	41.4	41.4	27.692	256	0	0.0304796	0.136917	0	0.0411163	0.142814	6	0.977269	1.68185	0.234622	0.624396	FALSE	13.5874	0.00537302	0.0384265	TRUE	+				1874	;P30048(IPI00024919)	GO:0005737;GO:0008385;GO:0005739;GO:0005769	1;1;1;1	GO:0043027;GO:0019901;GO:0016209;GO:0005515;GO:0019900;GO:0016491;GO:0042802;GO:0051920;GO:0008785;GO:0008022;GO:0004601	1;1;1;1;1;1;1;1;1;1;1	GO:0001893;GO:0033673;GO:0007005;GO:0006979;GO:0034614;GO:0055114;GO:0051092;GO:0043154;GO:0043066;GO:0042744;GO:0030099;GO:0032496;GO:0042542;GO:0051881;GO:0008284	1;1;1;1;1;1;1;1;1;1;1;1;1;1;1	mitochondrion;IkappaB kinase complex;early endosome;cytoplasm	1;1;1;1	protein kinase binding;kinase binding;oxidoreductase activity;protein C-terminus binding;peroxiredoxin activity;cysteine-type endopeptidase inhibitor activity involved in apoptotic process;identical protein binding;peroxidase activity;protein binding;alkyl hydroperoxide reductase activity;antioxidant activity	1;1;1;1;1;1;1;1;1;1;1	oxidation-reduction process;myeloid cell differentiation;cellular response to reactive oxygen species;response to lipopolysaccharide;hydrogen peroxide catabolic process;regulation of mitochondrial membrane potential;negative regulation of apoptotic process;response to oxidative stress;positive regulation of NF-kappaB transcription factor activity;maternal placenta development;negative regulation …	1;1;1;1;1;1;1;1;1;1;1;1;1;1;1	P30048
1881	IPI:IPI00024990.6	Methylmalonate-semialdehyde dehydrogenase [acylating], mitochondrial;Aldehyde dehydrogenase family 6 member A1	ALDH6A1;MMSDH	Methylmalonate-semialdehyde dehydrogenase [acylating], mitochondrial	Q02252	MMSA_HUMAN	1	10	10	10	19.8	19.8	57.839	535	0	0.13043	0.607891	0	0.105768	0.572042	6	0.979017	1.77523	0.217849	0.614083	FALSE	12.7387	0.00610602	0.0409917	TRUE	+				1881	;Q02252(IPI00024990)	GO:0005759;GO:0005730;GO:0005739;GO:0005634	1;1;1;1	GO:0018478;GO:0016491;GO:0016620;GO:0000062;GO:0004491	1;1;1;1;1	GO:0008152;GO:0050873;GO:0055114;GO:0044281;GO:0019859;GO:0006573;GO:0034641;GO:0009083	1;1;1;1;1;1;1;1	mitochondrion;nucleus;mitochondrial matrix;nucleolus	1;1;1;1	oxidoreductase activity, acting on the aldehyde or oxo group of donors, NAD or NADP as acceptor;oxidoreductase activity;malonate-semialdehyde dehydrogenase (acetylating) activity;methylmalonate-semialdehyde dehydrogenase (acylating) activity;fatty-acyl-CoA binding	1;1;1;1;1	oxidation-reduction process;brown fat cell differentiation;valine metabolic process;small molecule metabolic process;cellular nitrogen compound metabolic process;metabolic process;branched-chain amino acid catabolic process;thymine metabolic process	1;1;1;1;1;1;1;1	Q02252
1916	IPI:IPI00025366.4	Citrate synthase, mitochondrial	CS	Citrate synthase, mitochondrial	O75390	CISY_HUMAN	1	13	13	13	30	30	51.712	466	0	-0.0096022	0.220325	0	0.0296018	0.232798	6	0.999318	0.481288	0.677824	0.878716	FALSE	12.6967	0.00614614	0.041033	TRUE	+				1916	;O75390(IPI00025366)	GO:0005759;GO:0005739	1;1	GO:0046912;GO:0016740;GO:0004108	1;1;1	GO:0044237;GO:0044262;GO:0044281;GO:0005975;GO:0006099	1;1;1;1;1	mitochondrion;mitochondrial matrix	1;1	transferase activity;transferase activity, transferring acyl groups, acyl groups converted into alkyl on transfer;citrate (Si)-synthase activity	1;1;1	cellular carbohydrate metabolic process;small molecule metabolic process;tricarboxylic acid cycle;cellular metabolic process;carbohydrate metabolic process	1;1;1;1;1	O75390
1918	IPI:IPI00025383.1	T-cell surface glycoprotein CD5;Lymphocyte antigen T1/Leu-1	CD5;LEU1	T-cell surface glycoprotein CD5	P06127	CD5_HUMAN	1	11	11	11	30.3	30.3	54.624	495	0	0.110535	0.87992	0	0.127821	0.832685	6	0.99333	3.40122	0.0766378	0.443322	FALSE	17.1482	0.00338342	0.0347039	TRUE	+				1918	;P06127(IPI00025383)	GO:0016020;GO:0009897;GO:0005887;GO:0016021;GO:0005886	1;1;1;1;1	GO:0005515;GO:0005044;GO:0004888;GO:0004872	1;1;1;1	GO:0097190;GO:0008037;GO:0031295;GO:0008283	1;1;1;1	integral to membrane;plasma membrane;integral to plasma membrane;external side of plasma membrane;membrane	1;1;1;1;1	transmembrane signaling receptor activity;receptor activity;protein binding;scavenger receptor activity	1;1;1;1	apoptotic signaling pathway;cell recognition;cell proliferation;T cell costimulation	1;1;1;1	P06127
1955	IPI:IPI00026087.1	Barrier-to-autointegration factor;Breakpoint cluster region protein 1	BANF1;BAF;BCRG1	Barrier-to-autointegration factor	O75531	BAF_HUMAN	1	11	11	10	71.9	71.9	10.058	89	0	0.0145005	0.268652	0	0.0542939	0.254441	6	0.998848	0.825845	0.495725	0.785648	FALSE	10.8323	0.00841485	0.0456638	TRUE	+				1955	;O75531(IPI00026087)	GO:0005737;GO:0005829;GO:0005634;GO:0005654;GO:0005694	1;1;1;1;1	GO:0003677;GO:0005515	1;1	GO:0007084;GO:0007077;GO:0000278;GO:0075713;GO:0009615;GO:0016032;GO:0015074;GO:0019048	1;1;1;1;1;1;1;1	nucleoplasm;chromosome;nucleus;cytoplasm;cytosol	1;1;1;1;1	DNA binding;protein binding	1;1	mitotic cell cycle;mitotic nuclear envelope reassembly;viral process;DNA integration;mitotic nuclear envelope disassembly;response to virus;establishment of integrated proviral latency;modulation by virus of host morphology or physiology	1;1;1;1;1;1;1;1	O75531
1958	IPI:IPI00026111.3;IPI:IPI00761107.1	Transmembrane and coiled-coil domain-containing protein 1;Xenogeneic cross-immune protein PCIA3;Transmembrane and coiled-coil domains protein 4	TMCO1;TMCC4;PNAS-10;PNAS-136;UNQ151/PRO177	Isoform 1 of Transmembrane and coiled-coil domain-containing protein 1;Isoform 2 of Transmembrane and coiled-coil domain-containing protein 1	Q9UM00-1;Q9UM00;Q9UM00-2	TMCO1_HUMAN	2	3	3	3	19.7	19.7	21.175	188	0	0.105344	0.403541	0	0.0970026	0.407289	6	0.96782	4.55675	0.0449389	0.395094	FALSE	10.6175	0.00875434	0.0465516	TRUE	+				1958	;Q9UM00(IPI00761107;IPI00026111)	GO:0016020;GO:0005783;GO:0000139;GO:0016021;GO:0005794;GO:0005789	1;1;1;1;1;1					Golgi membrane;integral to membrane;endoplasmic reticulum membrane;Golgi apparatus;endoplasmic reticulum;membrane	1;1;1;1;1;1					Q9UM00
1959	IPI:IPI00026156.2	Hematopoietic lineage cell-specific protein;Hematopoietic cell-specific LYN substrate 1;LckBP1;p75	HCLS1;HS1	Hematopoietic lineage cell-specific protein	P14317	HCLS1_HUMAN	1	16	16	16	38.5	38.5	53.983	486	0	0.0794762	0.417219	0	0.0620019	0.417655	6	0.98378	2.63319	0.119019	0.52602	FALSE	24.3687	0.00167974	0.0330512	TRUE	+				1959	;P14317(IPI00026156)	GO:0016020;GO:0005737;GO:0005667;GO:0005739;GO:0005886;GO:0005634	1;1;1;1;1;1	GO:0019901;GO:0005515;GO:0017124;GO:0001085;GO:0032403	1;1;1;1;1	GO:0030833;GO:0071345;GO:0014068;GO:0045944;GO:0033138;GO:0000122;GO:2000251;GO:0030854;GO:0030218;GO:0050731;GO:0045651;GO:0042993;GO:0051897;GO:0006355;GO:0035556;GO:0042531;GO:0009725;GO:2000107;GO:0008284	1;1;1;1;1;1;1;1;1;1;1;1;1;1;1;1;1;1;1	mitochondrion;transcription factor complex;nucleus;plasma membrane;cytoplasm;membrane	1;1;1;1;1;1	protein kinase binding;RNA polymerase II transcription factor binding;protein binding;SH3 domain binding;protein complex binding	1;1;1;1;1	intracellular signal transduction;positive regulation of granulocyte differentiation;cellular response to cytokine stimulus;response to hormone stimulus;erythrocyte differentiation;positive regulation of transcription from RNA polymerase II promoter;positive regulation of protein kinase B signaling cascade;positive regulation of peptidyl-tyrosine phosphorylation;regulation of transcription, DNA-d…	1;1;1;1;1;1;1;1;1;1;1;1;1;1;1;1;1;1;1	P14317
1988	IPI:IPI00026530.4	Protein ERGIC-53;ER-Golgi intermediate compartment 53 kDa protein;Lectin mannose-binding 1;Gp58;Intracellular mannose-specific lectin MR60	LMAN1;ERGIC53;F5F8D	Protein ERGIC-53	P49257	LMAN1_HUMAN	1	13	13	12	37.5	36.3	57.548	510	0	0.101916	0.490904	0	0.0968181	0.479133	6	0.980464	7.48079	0.017404	0.340066	FALSE	38.8297	0.000662584	0.0262713	TRUE	+				1988	;P49257(IPI00026530)	GO:0016020;GO:0005783;GO:0033116;GO:0000139;GO:0016021;GO:0005793;GO:0030017;GO:0005794;GO:0005789;GO:0012507	1;1;1;1;1;1;1;1;1;1	GO:0005515;GO:0005537;GO:0046872;GO:0051082	1;1;1;1	GO:0007596;GO:0015031;GO:0006457;GO:0006810;GO:0010638;GO:0007030;GO:0043687;GO:0044267;GO:0032527;GO:0016192;GO:0018279;GO:0034498;GO:0006888	1;1;1;1;1;1;1;1;1;1;1;1;1	endoplasmic reticulum-Golgi intermediate compartment;ER to Golgi transport vesicle membrane;endoplasmic reticulum-Golgi intermediate compartment membrane;Golgi membrane;integral to membrane;sarcomere;endoplasmic reticulum membrane;Golgi apparatus;endoplasmic reticulum;membrane	1;1;1;1;1;1;1;1;1;1	unfolded protein binding;protein binding;mannose binding;metal ion binding	1;1;1;1	protein exit from endoplasmic reticulum;vesicle-mediated transport;ER to Golgi vesicle-mediated transport;transport;protein folding;cellular protein metabolic process;post-translational protein modification;protein transport;early endosome to Golgi transport;positive regulation of organelle organization;Golgi organization;blood coagulation;protein N-linked glycosylation via asparagine	1;1;1;1;1;1;1;1;1;1;1;1;1	P49257
2048	IPI:IPI00027341.1	Macrophage-capping protein;Actin regulatory protein CAP-G	CAPG;AFCP;MCP	Macrophage-capping protein	P40121	CAPG_HUMAN	1	16	16	16	48.6	48.6	38.517	348	0	-0.0239269	0.116923	0	0.0112303	0.112818	6	0.987321	0.198683	0.860876	0.949073	FALSE	25.6618	0.00151508	0.0318696	TRUE	+				2048	;P40121(IPI00027341)	GO:0042470;GO:0005737;GO:0008290;GO:0005730;GO:0031965;GO:0005634	1;1;1;1;1;1	GO:0003779	1	GO:0051693;GO:0051016;GO:0006461;GO:0030031	1;1;1;1	nucleus;melanosome;F-actin capping protein complex;cytoplasm;nuclear membrane;nucleolus	1;1;1;1;1;1	actin binding	1	barbed-end actin filament capping;cell projection assembly;protein complex assembly;actin filament capping	1;1;1;1	P40121
2081	IPI:IPI00027776.6	Ferrochelatase, mitochondrial;Protoheme ferro-lyase;Heme synthetase	FECH	Ferrochelatase, mitochondrial	P22830	HEMH_HUMAN	1	20	20	20	53.7	53.7	47.862	423	0	0.0534244	0.307515	0	0.0484288	0.302125	6	0.986696	3.34216	0.0790546	0.448077	FALSE	26.625	0.00140768	0.0311436	TRUE	+				2081	;P22830(IPI00027776)	GO:0016020;GO:0005759;GO:0005739;GO:0005743	1;1;1;1	GO:0051537;GO:0005506;GO:0016829;GO:0005515;GO:0020037;GO:0051536;GO:0004325;GO:0046872;GO:0046906;GO:0030350;GO:0008198	1;1;1;1;1;1;1;1;1;1;1	GO:0009589;GO:0034379;GO:0006091;GO:0044281;GO:0030218;GO:0046984;GO:0006783;GO:0055072;GO:0046501;GO:0010999;GO:0006778;GO:0008203;GO:0009416;GO:0006779	1;1;1;1;1;1;1;1;1;1;1;1;1;1	mitochondrion;mitochondrial inner membrane;mitochondrial matrix;membrane	1;1;1;1	lyase activity;ferrochelatase activity;iron-responsive element binding;tetrapyrrole binding;ferrous iron binding;heme binding;protein binding;iron-sulfur cluster binding;iron ion binding;2 iron, 2 sulfur cluster binding;metal ion binding	1;1;1;1;1;1;1;1;1;1;1	porphyrin-containing compound metabolic process;iron ion homeostasis;regulation of eIF2 alpha phosphorylation by heme;protoporphyrinogen IX metabolic process;generation of precursor metabolites and energy;erythrocyte differentiation;cholesterol metabolic process;small molecule metabolic process;response to light stimulus;very-low-density lipoprotein particle assembly;detection of UV;heme biosynth…	1;1;1;1;1;1;1;1;1;1;1;1;1;1	P22830
2098	IPI:IPI00028006.1	Proteasome subunit beta type-2;Proteasome component C7-I;Macropain subunit C7-I;Multicatalytic endopeptidase complex subunit C7-I	PSMB2	Proteasome subunit beta type-2	P49721	PSB2_HUMAN	1	10	10	10	39.3	39.3	22.836	201	0	0.0380576	0.213936	0	0.0565758	0.211629	6	0.986002	1.34013	0.312161	0.683226	FALSE	22.8192	0.00191492	0.0330512	TRUE	+				2098	;P49721(IPI00028006)	GO:0000502;GO:0005737;GO:0005730;GO:0005829;GO:0005654;GO:0005634;GO:0005839	1;1;1;1;1;1;1	GO:0008233;GO:0016787;GO:0004175;GO:0004298	1;1;1;1	GO:0006915;GO:0042590;GO:0000278;GO:0014070;GO:0006521;GO:0044281;GO:0016070;GO:0010243;GO:0051436;GO:0031145;GO:0016071;GO:0051603;GO:0000209;GO:0043066;GO:0016032;GO:0034641;GO:0006508;GO:0002479;GO:0000082;GO:0051439;GO:0002474;GO:0051437;GO:0010467;GO:0019048;GO:0006977;GO:0042981	1;1;1;1;1;1;1;1;1;1;1;1;1;1;1;1;1;1;1;1;1;1;1;1;1;1	proteasome core complex;nucleoplasm;proteasome complex;nucleus;cytoplasm;cytosol;nucleolus	1;1;1;1;1;1;1	endopeptidase activity;peptidase activity;hydrolase activity;threonine-type endopeptidase activity	1;1;1;1	antigen processing and presentation of peptide antigen via MHC class I;mitotic cell cycle;anaphase-promoting complex-dependent proteasomal ubiquitin-dependent protein catabolic process;DNA damage response, signal transduction by p53 class mediator resulting in cell cycle arrest;positive regulation of ubiquitin-protein ligase activity involved in mitotic cell cycle;antigen processing and presentat…	1;1;1;1;1;1;1;1;1;1;1;1;1;1;1;1;1;1;1;1;1;1;1;1;1;1	P49721
2109	IPI:IPI00028091.3	Actin-related protein 3;Actin-like protein 3	ACTR3;ARP3	Actin-related protein 3	P61158	ARP3_HUMAN	4	27	27	27	61.5	61.5	47.371	418	0	0.0285151	0.430844	0	0.0261021	0.427139	6	0.998248	1.52677	0.266368	0.646863	FALSE	48.427	0.000426135	0.0234839	TRUE	+				2109	;P61158(IPI00028091)	GO:0031252;GO:0042995;GO:0060076;GO:0005737;GO:0000139;GO:0002102;GO:0005829;GO:0015629;GO:0005856;GO:0005885;GO:0030027;GO:0030056	1;1;1;1;1;1;1;1;1;1;1;1	GO:0005524;GO:0005515;GO:0000166;GO:0003779	1;1;1;1	GO:0030833;GO:0034314;GO:0045666;GO:0060271;GO:0008356;GO:0009743;GO:0043519;GO:0051321;GO:0007163;GO:0030030;GO:0051653;GO:0046677;GO:0045087;GO:0010592;GO:0030838;GO:0050775;GO:0051491;GO:0033206;GO:0006928;GO:0038096	1;1;1;1;1;1;1;1;1;1;1;1;1;1;1;1;1;1;1;1	podosome;Golgi membrane;hemidesmosome;cell projection;excitatory synapse;Arp2/3 protein complex;cell leading edge;actin cytoskeleton;cytoplasm;cytosol;cytoskeleton;lamellipodium	1;1;1;1;1;1;1;1;1;1;1;1	ATP binding;nucleotide binding;actin binding;protein binding	1;1;1;1	positive regulation of filopodium assembly;regulation of myosin II filament organization;positive regulation of actin filament polymerization;innate immune response;regulation of actin filament polymerization;response to carbohydrate stimulus;meiotic cell cycle;response to antibiotic;spindle localization;positive regulation of lamellipodium assembly;Arp2/3 complex-mediated actin nucleation;asymme…	1;1;1;1;1;1;1;1;1;1;1;1;1;1;1;1;1;1;1;1	P61158
2140	IPI:IPI00028635.5	Dolichyl-diphosphooligosaccharide--protein glycosyltransferase subunit 2;Dolichyl-diphosphooligosaccharide--protein glycosyltransferase 63 kDa subunit;Ribophorin-2;Ribophorin II;RIBIIR	RPN2	Dolichyl-diphosphooligosaccharide--protein glycosyltransferase subunit 2	P04844	RPN2_HUMAN	1	21	21	21	45.2	45.2	69.283	631	0	0.00939791	0.22045	0	0.0411959	0.206649	6	0.999289	1.25863	0.33518	0.692269	FALSE	14.3199	0.00484127	0.0376153	TRUE	+				2140	;P04844(IPI00028635)	GO:0016020;GO:0005783;GO:0005791;GO:0008250;GO:0016021;GO:0005634;GO:0005789;GO:0000421	1;1;1;1;1;1;1;1	GO:0004579;GO:0043022;GO:0016757;GO:0016740	1;1;1;1	GO:0006412;GO:0006487;GO:0006486;GO:0007568;GO:0006464;GO:0043687;GO:0044267;GO:0042493;GO:0006614;GO:0018279;GO:0010467	1;1;1;1;1;1;1;1;1;1;1	autophagic vacuole membrane;integral to membrane;nucleus;endoplasmic reticulum membrane;oligosaccharyltransferase complex;endoplasmic reticulum;rough endoplasmic reticulum;membrane	1;1;1;1;1;1;1;1	ribosome binding;transferase activity;dolichyl-diphosphooligosaccharide-protein glycotransferase activity;transferase activity, transferring glycosyl groups	1;1;1;1	protein N-linked glycosylation;aging;response to drug;cellular protein metabolic process;post-translational protein modification;protein glycosylation;gene expression;translation;cellular protein modification process;protein N-linked glycosylation via asparagine;SRP-dependent cotranslational protein targeting to membrane	1;1;1;1;1;1;1;1;1;1;1	P04844
2187	IPI:IPI00029623.1	Proteasome subunit alpha type-6;Proteasome iota chain;Macropain iota chain;Multicatalytic endopeptidase complex iota chain;27 kDa prosomal protein;PROS-27;p27K	PSMA6;PROS27	Proteasome subunit alpha type-6	P60900	PSA6_HUMAN	1	10	10	10	48.8	48.8	27.399	246	0	0.033935	0.15816	0	0.020233	0.164124	6	0.979017	0.977551	0.431388	0.75366	FALSE	10.3755	0.00916185	0.047714	TRUE	+				2187	;P60900(IPI00029623)	GO:0019773;GO:0000502;GO:0030016;GO:0000932;GO:0005737;GO:0005829;GO:0005739;GO:0005634;GO:0005654;GO:0016363;GO:0030017;GO:0005839;GO:0005844	1;1;1;1;1;1;1;1;1;1;1;1;1	GO:0003723;GO:0008233;GO:0016787;GO:0005515;GO:0004175;GO:0004298;GO:0051059;GO:0035639	1;1;1;1;1;1;1;1	GO:0006915;GO:0042590;GO:0000278;GO:0006521;GO:0044281;GO:0006511;GO:0016070;GO:0051092;GO:0051436;GO:0031145;GO:0016071;GO:0051603;GO:0000209;GO:0043066;GO:0016032;GO:0006508;GO:0034641;GO:0002479;GO:0000082;GO:0051439;GO:0002474;GO:0051437;GO:0050727;GO:0010467;GO:0006977;GO:0042981	1;1;1;1;1;1;1;1;1;1;1;1;1;1;1;1;1;1;1;1;1;1;1;1;1;1	proteasome core complex;nucleoplasm;mitochondrion;proteasome complex;nuclear matrix;myofibril;sarcomere;nucleus;polysome;cytoplasm;cytosol;proteasome core complex, alpha-subunit complex;cytoplasmic mRNA processing body	1;1;1;1;1;1;1;1;1;1;1;1;1	endopeptidase activity;purine ribonucleoside triphosphate binding;peptidase activity;RNA binding;hydrolase activity;threonine-type endopeptidase activity;NF-kappaB binding;protein binding	1;1;1;1;1;1;1;1	antigen processing and presentation of peptide antigen via MHC class I;mitotic cell cycle;anaphase-promoting complex-dependent proteasomal ubiquitin-dependent protein catabolic process;DNA damage response, signal transduction by p53 class mediator resulting in cell cycle arrest;positive regulation of ubiquitin-protein ligase activity involved in mitotic cell cycle;antigen processing and presentat…	1;1;1;1;1;1;1;1;1;1;1;1;1;1;1;1;1;1;1;1;1;1;1;1;1;1	P60900
2256	IPI:IPI00030706.1	Activator of 90 kDa heat shock protein ATPase homolog 1;p38	AHSA1;C14orf3;HSPC322	Activator of 90 kDa heat shock protein ATPase homolog 1	O95433	AHSA1_HUMAN	1	19	19	19	55.9	55.9	38.274	338	0	0.278333	1.04844	0	0.226784	1.06867	6	0.966612	3.64391	0.067748	0.429023	FALSE	34.0185	0.000862994	0.0281262	TRUE	+				2256	;O95433(IPI00030706)	GO:0005783;GO:0005737;GO:0005829	1;1;1	GO:0051087;GO:0005515;GO:0001671	1;1;1	GO:0006457;GO:0032781;GO:0006950	1;1;1	endoplasmic reticulum;cytoplasm;cytosol	1;1;1	chaperone binding;ATPase activator activity;protein binding	1;1;1	positive regulation of ATPase activity;protein folding;response to stress	1;1;1	O95433
2287	IPI:IPI00031169.1	Ras-related protein Rab-2A	RAB2A;RAB2	Ras-related protein Rab-2A	P61019	RAB2A_HUMAN	1	12	5	5	59.9	31.1	23.545	212	0	0.0373466	0.22667	0	0.0669737	0.232242	6	0.988125	1.71823	0.227893	0.619231	FALSE	18.3835	0.00294592	0.0347039	TRUE	+				2287	;P61019(IPI00031169)	GO:0016020;GO:0005783;GO:0042470;GO:0033116;GO:0000139;GO:0005794;GO:0005789	1;1;1;1;1;1;1	GO:0000166;GO:0019003;GO:0003924;GO:0005525	1;1;1;1	GO:0015031;GO:0006184;GO:0000278;GO:0007264;GO:0006810;GO:0016192;GO:0006888	1;1;1;1;1;1;1	endoplasmic reticulum-Golgi intermediate compartment membrane;Golgi membrane;endoplasmic reticulum membrane;melanosome;Golgi apparatus;endoplasmic reticulum;membrane	1;1;1;1;1;1;1	GDP binding;GTP binding;GTPase activity;nucleotide binding	1;1;1;1	mitotic cell cycle;GTP catabolic process;vesicle-mediated transport;ER to Golgi vesicle-mediated transport;transport;protein transport;small GTPase mediated signal transduction	1;1;1;1;1;1;1	P61019
2319	IPI:IPI00031622.3	Coiled-coil-helix-coiled-coil-helix domain-containing protein 6	CHCHD6	Coiled-coil-helix-coiled-coil-helix domain-containing protein 6	Q9BRQ6	CHCH6_HUMAN	1	4	4	4	26	26	26.457	235	0	0.158887	0.837956	0	0.19509	0.781834	6	0.983941	2.91947	0.10003	0.499262	FALSE	10.4328	0.00906287	0.0474145	TRUE	+				2319	;Q9BRQ6(IPI00031622)	GO:0016020;GO:0005739;GO:0005743	1;1;1	GO:0005515	1	GO:0042407;GO:0006974	1;1	mitochondrion;mitochondrial inner membrane;membrane	1;1;1	protein binding	1	cristae formation;response to DNA damage stimulus	1;1	Q9BRQ6
2401	IPI:IPI00032826.1	Hsc70-interacting protein;Suppression of tumorigenicity protein 13;Putative tumor suppressor ST13;Protein FAM10A1;Progesterone receptor-associated p48 protein;Renal carcinoma antigen NY-REN-33;Protein FAM10A5;Protein FAM10A4	ST13;FAM10A1;HIP;SNC6;FAM10A5;FAM10A4	Hsc70-interacting protein;Protein FAM10A5;Protein FAM10A4	P50502;Q8NFI4;Q8IZP2	F10A1_HUMAN;F10A5_HUMAN;F10A4_HUMAN	3	16	16	16	33.3	33.3	41.331	369	0	0.0460226	0.5579	0	0.0654898	0.572663	6	0.997235	2.9077	0.100723	0.499827	FALSE	32.2796	0.000958341	0.0291412	TRUE	+				2401	;P50502(IPI00032826)	GO:0005737;GO:0005829;GO:0043234	1;1;1	GO:0030674;GO:0051087;GO:0005515;GO:0030544;GO:0032564;GO:0042802;GO:0019904;GO:0051082;GO:0032403	1;1;1;1;1;1;1;1;1	GO:0070389;GO:0006457;GO:0061084;GO:0051260	1;1;1;1	protein complex;cytoplasm;cytosol	1;1;1	Hsp70 protein binding;chaperone binding;identical protein binding;unfolded protein binding;protein binding, bridging;protein binding;dATP binding;protein complex binding;protein domain specific binding	1;1;1;1;1;1;1;1;1	chaperone cofactor-dependent protein refolding;protein folding;protein homooligomerization;negative regulation of protein refolding	1;1;1;1	P50502
2407	IPI:IPI00032851.1	Coatomer subunit zeta-1;Zeta-1-coat protein	COPZ1;COPZ;CGI-120;HSPC181	Coatomer subunit zeta-1	P61923	COPZ1_HUMAN	1	6	6	6	36.7	36.7	20.198	177	0	0.0484882	0.412425	0	0.0260846	0.411752	6	0.9942	0.722124	0.545237	0.814564	FALSE	14.4067	0.00478351	0.0376153	TRUE	+				2407	;P61923(IPI00032851)	GO:0016020;GO:0031410;GO:0005737;GO:0000139;GO:0030663;GO:0005829;GO:0030126;GO:0030117;GO:0005794	1;1;1;1;1;1;1;1;1			GO:0015031;GO:0006891;GO:0006810;GO:0048205;GO:0006886;GO:0016044;GO:0016192;GO:0006890	1;1;1;1;1;1;1;1	COPI-coated vesicle membrane;Golgi membrane;COPI vesicle coat;membrane coat;Golgi apparatus;cytoplasm;cytosol;cytoplasmic vesicle;membrane	1;1;1;1;1;1;1;1;1			intracellular protein transport;cellular membrane organization;vesicle-mediated transport;transport;COPI coating of Golgi vesicle;protein transport;intra-Golgi vesicle-mediated transport;retrograde vesicle-mediated transport, Golgi to ER	1;1;1;1;1;1;1;1	P61923
2420	IPI:IPI00657687.1;IPI:IPI00032958.3	Actin-binding protein anillin	ANLN	Isoform 1 of Actin-binding protein anillin;Isoform 2 of Actin-binding protein anillin	Q9NQW6-1;Q9NQW6;Q9NQW6-2	ANLN_HUMAN	2	14	14	14	15.9	15.9	124.2	1124	0	-0.0130004	1.23383	0	-0.00972014	1.23772	6	0.999959	-0.260869	0.818598	0.931415	FALSE	26.9678	0.00137219	0.0305817	TRUE	+				2420	;Q9NQW6(IPI00032958)	GO:0005938;GO:0005737;GO:0015629;GO:0005856;GO:0005634;GO:0005826	1;1;1;1;1;1	GO:0005543;GO:0003779	1;1	GO:0007067;GO:0007096;GO:0051301;GO:0000921;GO:0000910;GO:0007049	1;1;1;1;1;1	cell cortex;nucleus;actomyosin contractile ring;actin cytoskeleton;cytoplasm;cytoskeleton	1;1;1;1;1;1	phospholipid binding;actin binding	1;1	cell division;septin ring assembly;mitosis;cytokinesis;regulation of exit from mitosis;cell cycle	1;1;1;1;1;1	Q9NQW6
2453	IPI:IPI00034159.1	V-type proton ATPase subunit d 1;Vacuolar proton pump subunit d 1;V-ATPase AC39 subunit;V-ATPase 40 kDa accessory protein;P39;32 kDa accessory protein	ATP6V0D1;ATP6D;VPATPD	V-type proton ATPase subunit d 1	P61421	VA0D1_HUMAN	1	10	10	10	30.8	30.8	40.329	351	0	0.00919116	0.249753	0	-0.01795	0.254257	6	0.999473	-0.343222	0.764152	0.915716	FALSE	16.224	0.00377761	0.0353912	TRUE	+				2453	;P61421(IPI00034159)	GO:0033179;GO:0016020;GO:0010008;GO:0016324;GO:0043679;GO:0005769;GO:0016471;GO:0008021;GO:0005813;GO:0030670;GO:0043005;GO:0043234	1;1;1;1;1;1;1;1;1;1;1;1	GO:0005515;GO:0015078;GO:0008553;GO:0032403	1;1;1;1	GO:0008286;GO:0007420;GO:0030968;GO:0033572;GO:0006810;GO:0030030;GO:0015991;GO:0006879;GO:0044267;GO:0090382;GO:0051701;GO:0006987;GO:0015992;GO:0055085;GO:0006811;GO:0042384	1;1;1;1;1;1;1;1;1;1;1;1;1;1;1;1	synaptic vesicle;neuron projection;phagocytic vesicle membrane;apical plasma membrane;centrosome;protein complex;early endosome;vacuolar proton-transporting V-type ATPase complex;endosome membrane;proton-transporting V-type ATPase, V0 domain;axon terminus;membrane	1;1;1;1;1;1;1;1;1;1;1;1	hydrogen-exporting ATPase activity, phosphorylative mechanism;hydrogen ion transmembrane transporter activity;protein binding;protein complex binding	1;1;1;1	proton transport;activation of signaling protein activity involved in unfolded protein response;transferrin transport;transport;ion transport;cellular protein metabolic process;ATP hydrolysis coupled proton transport;phagosome maturation;transmembrane transport;insulin receptor signaling pathway;interaction with host;cellular iron ion homeostasis;cilium assembly;endoplasmic reticulum unfolded pro…	1;1;1;1;1;1;1;1;1;1;1;1;1;1;1;1	P61421
2705	IPI:IPI00101734.5	Protein FAM105B	FAM105B	Protein FAM105B	Q96BN8	F105B_HUMAN	1	6	6	6	19.6	19.6	40.262	352	0	0.0626237	0.657617	0	0.043726	0.648974	6	0.996272	0.433571	0.706885	0.893319	FALSE	18.7953	0.00281879	0.0347039	TRUE	+				2705	;Q96BN8(IPI00101734)	GO:0005737	1	GO:0004843;GO:0008233;GO:0008234;GO:0005515;GO:0016787	1;1;1;1;1	GO:0032088;GO:0001525;GO:0060070;GO:0016055;GO:0002040;GO:1990108;GO:0006508	1;1;1;1;1;1;1	cytoplasm	1	cysteine-type peptidase activity;ubiquitin-specific protease activity;peptidase activity;hydrolase activity;protein binding	1;1;1;1;1	Wnt receptor signaling pathway;sprouting angiogenesis;canonical Wnt receptor signaling pathway;protein linear deubiquitination;negative regulation of NF-kappaB transcription factor activity;proteolysis;angiogenesis	1;1;1;1;1;1;1	Q96BN8
2724	IPI:IPI00102896.1	Ras-related protein Rab-2B	RAB2B	Ras-related protein Rab-2B	Q8WUD1	RAB2B_HUMAN	1	13	13	6	60.6	32.4	24.214	216	0	0.056881	0.310798	0	0.0810068	0.308076	6	0.98512	1.87832	0.201119	0.600326	FALSE	16.0569	0.00385618	0.0355093	TRUE	+				2724	;Q8WUD1(IPI00102896)	GO:0016020;GO:0005783;GO:0000139;GO:0005886;GO:0005794;GO:0005789	1;1;1;1;1;1	GO:0000166;GO:0005525	1;1	GO:0015031;GO:0045921;GO:0007264;GO:0006810;GO:0016192	1;1;1;1;1	Golgi membrane;plasma membrane;endoplasmic reticulum membrane;Golgi apparatus;endoplasmic reticulum;membrane	1;1;1;1;1;1	GTP binding;nucleotide binding	1;1	vesicle-mediated transport;transport;protein transport;positive regulation of exocytosis;small GTPase mediated signal transduction	1;1;1;1;1	Q8WUD1
2764	IPI:IPI00105598.3	26S proteasome non-ATPase regulatory subunit 11;26S proteasome regulatory subunit S9;26S proteasome regulatory subunit p44.5	PSMD11	Proteasome 26S non-ATPase subunit 11 variant (Fragment)	O00231	PSD11_HUMAN	1	33	33	33	63.8	63.8	47.534	423	0	0.0411165	0.159982	0	0.0369997	0.165801	6	0.9689	3.7418	0.0645812	0.426236	FALSE	17.2414	0.00334712	0.0347039	TRUE	+				2764	;O00231(IPI00105598)	GO:0000502;GO:0005737;GO:0005829;GO:0005634;GO:0005654;GO:0022624	1;1;1;1;1;1			GO:0006915;GO:0042590;GO:0000278;GO:0006521;GO:0044281;GO:0006511;GO:0016070;GO:0051436;GO:0031145;GO:0016071;GO:0043248;GO:0000209;GO:0043066;GO:0016032;GO:0034641;GO:0002479;GO:0000082;GO:0051439;GO:0002474;GO:0051437;GO:0048863;GO:0010467;GO:0006977;GO:0042981	1;1;1;1;1;1;1;1;1;1;1;1;1;1;1;1;1;1;1;1;1;1;1;1	nucleoplasm;proteasome complex;nucleus;cytoplasm;cytosol;proteasome accessory complex	1;1;1;1;1;1			antigen processing and presentation of peptide antigen via MHC class I;mitotic cell cycle;anaphase-promoting complex-dependent proteasomal ubiquitin-dependent protein catabolic process;DNA damage response, signal transduction by p53 class mediator resulting in cell cycle arrest;positive regulation of ubiquitin-protein ligase activity involved in mitotic cell cycle;antigen processing and presentat…	1;1;1;1;1;1;1;1;1;1;1;1;1;1;1;1;1;1;1;1;1;1;1;1	O00231
2857	IPI:IPI00152946.1	Rac GTPase-activating protein 1;Male germ cell RacGap	RACGAP1;KIAA1478;MGCRACGAP	Rac GTPase-activating protein 1	Q9H0H5	RGAP1_HUMAN	1	13	13	13	24.7	24.7	71.026	632	0	-0.108671	0.572384	0	-0.0965543	0.584961	6	0.988912	-1.66268	0.238272	0.62479	FALSE	39.2861	0.000647293	0.0262713	TRUE	+				2857	;Q9H0H5(IPI00152946)	GO:0005874;GO:0051233;GO:0031410;GO:0005737;GO:0030496;GO:0005829;GO:0005819;GO:0005856;GO:0072686;GO:0005634;GO:0097149;GO:0001669;GO:0005622;GO:0032154	1;1;1;1;1;1;1;1;1;1;1;1;1;1	GO:0019901;GO:0043015;GO:0005515;GO:0048487;GO:0043014;GO:0008017;GO:0046872;GO:0005096	1;1;1;1;1;1;1;1	GO:0007596;GO:0051256;GO:0007108;GO:0007165;GO:0009790;GO:0051056;GO:0007405;GO:0007264;GO:0006810;GO:0019886;GO:0051301;GO:0051988;GO:0032467;GO:0000915;GO:0030154;GO:0008272;GO:0000910;GO:0007275;GO:0035556;GO:0043547;GO:0007283;GO:0007018;GO:0006811;GO:0007049	1;1;1;1;1;1;1;1;1;1;1;1;1;1;1;1;1;1;1;1;1;1;1;1	spindle midzone;centralspindlin complex;cleavage furrow;midbody;nucleus;spindle;acrosomal vesicle;intracellular;mitotic spindle;cytoplasm;cytosol;cytoplasmic vesicle;cytoskeleton;microtubule	1;1;1;1;1;1;1;1;1;1;1;1;1;1	microtubule binding;gamma-tubulin binding;protein kinase binding;GTPase activator activity;beta-tubulin binding;protein binding;alpha-tubulin binding;metal ion binding	1;1;1;1;1;1;1;1	cell differentiation;regulation of attachment of spindle microtubules to kinetochore;positive regulation of cytokinesis;cell division;intracellular signal transduction;transport;ion transport;spermatogenesis;cytokinesis, initiation of separation;regulation of small GTPase mediated signal transduction;sulfate transport;signal transduction;microtubule-based movement;positive regulation of GTPase ac…	1;1;1;1;1;1;1;1;1;1;1;1;1;1;1;1;1;1;1;1;1;1;1;1	Q9H0H5
2913	IPI:IPI00163727.8	Mps one binder kinase activator-like 2A;Mob1 homolog 2A;MOB-LAK;Protein Mob3A	MOBKL2A;MOB3A	Mps one binder kinase activator-like 2A	Q96BX8	MOL2A_HUMAN	1	5	5	5	24	24	25.464	217	0	-0.00751352	0.283968	0	-0.0452545	0.290614	6	0.999744	-0.654658	0.579914	0.83388	FALSE	13.7802	0.00522484	0.0383962	TRUE	+				2913	;Q96BX8(IPI00163727)	GO:0005622	1	GO:0046872	1			intracellular	1	metal ion binding	1			Q96BX8
2932	IPI:IPI00165261.6	Sec1 family domain-containing protein 1;Syntaxin-binding protein 1-like 2;Sly1p	SCFD1;C14orf163;KIAA0917;STXBP1L2;FKSG23	Sec1 family domain-containing protein 1	Q8WVM8	SCFD1_HUMAN	1	13	13	13	27.4	27.4	72.379	642	0	0.0199157	0.128969	0	0.0378879	0.133898	6	0.989661	1.53212	0.265185	0.645044	FALSE	13.4252	0.00550249	0.0391854	TRUE	+				2932	;Q8WVM8(IPI00165261)	GO:0016020;GO:0005783;GO:0032580;GO:0005737;GO:0005801;GO:0005798;GO:0005886;GO:0017119;GO:0005794;GO:0005789	1;1;1;1;1;1;1;1;1;1	GO:0047485;GO:0019905	1;1	GO:0015031;GO:0060628;GO:0006904;GO:0009636;GO:0006810;GO:0001666;GO:0016192;GO:0006890;GO:0006892	1;1;1;1;1;1;1;1;1	Golgi-associated vesicle;Golgi cisterna membrane;plasma membrane;endoplasmic reticulum membrane;Golgi apparatus;endoplasmic reticulum;Golgi transport complex;cis-Golgi network;cytoplasm;membrane	1;1;1;1;1;1;1;1;1;1	protein N-terminus binding;syntaxin binding	1;1	regulation of ER to Golgi vesicle-mediated transport;vesicle-mediated transport;transport;vesicle docking involved in exocytosis;post-Golgi vesicle-mediated transport;protein transport;response to hypoxia;response to toxic substance;retrograde vesicle-mediated transport, Golgi to ER	1;1;1;1;1;1;1;1;1	Q8WVM8
3020	IPI:IPI00169383.3	Phosphoglycerate kinase 1;Primer recognition protein 2;Cell migration-inducing gene 10 protein	PGK1;PGKA;MIG10;OK/SW-cl.110	Phosphoglycerate kinase 1	P00558	PGK1_HUMAN	2	41	41	41	88.7	88.7	44.614	417	0	0.0420269	0.222817	0	0.0444638	0.218132	6	0.984122	1.66164	0.238472	0.62479	FALSE	17.6579	0.00319184	0.0347039	TRUE	+				3020	;P00558(IPI00169383)	GO:0005737;GO:0005829	1;1	GO:0005524;GO:0000166;GO:0016301;GO:0004618;GO:0016740	1;1;1;1;1	GO:0006096;GO:0006006;GO:0006094;GO:0044281;GO:0005975;GO:0016310	1;1;1;1;1;1	cytoplasm;cytosol	1;1	transferase activity;ATP binding;phosphoglycerate kinase activity;nucleotide binding;kinase activity	1;1;1;1;1	glycolysis;glucose metabolic process;gluconeogenesis;small molecule metabolic process;phosphorylation;carbohydrate metabolic process	1;1;1;1;1;1	P00558
3030	IPI:IPI00170692.4	Vesicle-associated membrane protein-associated protein A;33 kDa Vamp-associated protein;VAP-33	VAPA;VAP33	Vesicle-associated membrane protein-associated protein A	Q9P0L0	VAPA_HUMAN	1	9	9	8	41.4	41.4	27.893	249	0	0.0381996	0.209655	0	0.0417414	0.215658	6	0.985263	0.947048	0.443577	0.761684	FALSE	21.1009	0.00223839	0.0330512	TRUE	+				3030	;Q9P0L0(IPI00170692)	GO:0016020;GO:0005783;GO:0005874;GO:0031982;GO:0016021;GO:0005923;GO:0005886;GO:0048471;GO:0005789	1;1;1;1;1;1;1;1;1	GO:0046982;GO:0005515;GO:0004871;GO:0005198	1;1;1;1	GO:0007165;GO:0030148;GO:0070972;GO:0006665;GO:0044281;GO:0006944;GO:0031175;GO:0008219;GO:0043123	1;1;1;1;1;1;1;1;1	tight junction;vesicle;integral to membrane;plasma membrane;endoplasmic reticulum membrane;endoplasmic reticulum;perinuclear region of cytoplasm;microtubule;membrane	1;1;1;1;1;1;1;1;1	protein heterodimerization activity;signal transducer activity;protein binding;structural molecule activity	1;1;1;1	neuron projection development;cell death;positive regulation of I-kappaB kinase/NF-kappaB cascade;small molecule metabolic process;signal transduction;sphingolipid metabolic process;sphingolipid biosynthetic process;protein localization to endoplasmic reticulum;cellular membrane fusion	1;1;1;1;1;1;1;1;1	Q9P0L0
3049	IPI:IPI00419249.5;IPI:IPI00171199.5	Proteasome subunit alpha type-3;Proteasome component C8;Macropain subunit C8;Multicatalytic endopeptidase complex subunit C8	PSMA3;PSC8	Isoform 1 of Proteasome subunit alpha type-3;Isoform 2 of Proteasome subunit alpha type-3	P25788-1;P25788;P25788-2	PSA3_HUMAN	2	13	13	13	43.9	43.9	28.433	255	0	0.0116262	0.171248	0	0.0303564	0.173553	6	0.998153	1.40893	0.294217	0.667551	FALSE	16.7235	0.00355649	0.0347039	TRUE	+				3049	;P25788(IPI00419249;IPI00171199)	GO:0019773;GO:0000502;GO:0005737;GO:0005829;GO:0005654;GO:0005634;GO:0005839	1;1;1;1;1;1;1	GO:0008233;GO:0005515;GO:0016787;GO:0004175;GO:0004298	1;1;1;1;1	GO:0006915;GO:0042590;GO:0000278;GO:0006521;GO:0044281;GO:0006511;GO:0016070;GO:0051436;GO:0031145;GO:0016071;GO:0051603;GO:0000209;GO:0043066;GO:0016032;GO:0034641;GO:0006508;GO:0002479;GO:0000082;GO:0051439;GO:0002474;GO:0051437;GO:0010467;GO:0019048;GO:0006977;GO:0042981	1;1;1;1;1;1;1;1;1;1;1;1;1;1;1;1;1;1;1;1;1;1;1;1;1	proteasome core complex;nucleoplasm;proteasome complex;nucleus;cytoplasm;cytosol;proteasome core complex, alpha-subunit complex	1;1;1;1;1;1;1	endopeptidase activity;peptidase activity;hydrolase activity;threonine-type endopeptidase activity;protein binding	1;1;1;1;1	antigen processing and presentation of peptide antigen via MHC class I;mitotic cell cycle;anaphase-promoting complex-dependent proteasomal ubiquitin-dependent protein catabolic process;DNA damage response, signal transduction by p53 class mediator resulting in cell cycle arrest;positive regulation of ubiquitin-protein ligase activity involved in mitotic cell cycle;antigen processing and presentat…	1;1;1;1;1;1;1;1;1;1;1;1;1;1;1;1;1;1;1;1;1;1;1;1;1	P25788
3111	IPI:IPI00177437.5;IPI:IPI00219317.3;IPI:IPI00219318.3	Crooked neck-like protein 1;Crooked neck homolog	CRNKL1;CRN;CGI-201;MSTP021	Isoform 1 of Crooked neck-like protein 1;Crooked neck pre-mRNA splicing factor-like 1;Isoform 3 of Crooked neck-like protein 1	Q9BZJ0-1;Q9BZJ0;Q9BZJ0-2;Q9BZJ0-3	CRNL1_HUMAN	3	19	19	19	21.8	21.8	100.45	848	0	0.0603141	0.259561	0	0.064889	0.254477	6	0.975044	3.46926	0.0739835	0.438653	FALSE	28.6329	0.00121752	0.0302484	TRUE	+				3111	;Q9BZJ0(IPI00219317;IPI00219318;IPI00177437)	GO:0005737;GO:0005681;GO:0005634;GO:0005622;GO:0016607;GO:0071013	1;1;1;1;1;1	GO:0003723	1	GO:0006396;GO:0006397;GO:0000398;GO:0008380;GO:0000245	1;1;1;1;1	nuclear speck;catalytic step 2 spliceosome;nucleus;intracellular;spliceosomal complex;cytoplasm	1;1;1;1;1;1	RNA binding	1	RNA splicing;mRNA processing;spliceosomal complex assembly;RNA processing;mRNA splicing, via spliceosome	1;1;1;1;1	Q9BZJ0
3181	IPI:IPI00182728.2	Vacuolar protein sorting-associated protein 4B;Suppressor of K(+) transport growth defect 1	VPS4B;SKD1;VPS42	Vacuolar protein sorting-associated protein 4B	O75351	VPS4B_HUMAN	1	11	11	10	33.1	30.4	49.301	444	0	0.0322257	0.299394	0	0.0348482	0.28916	6	0.995182	1.68624	0.233796	0.623317	FALSE	10.7251	0.00858182	0.0459567	TRUE	+				3181	;O75351(IPI00182728)	GO:0010008;GO:0016020;GO:0005770;GO:0005737;GO:0005829;GO:0005769;GO:0005634;GO:0031902;GO:0005764;GO:0005768;GO:0005774	1;1;1;1;1;1;1;1;1;1;1	GO:0005524;GO:0016787;GO:0005515;GO:0000166;GO:0017111;GO:0016887;GO:0042623;GO:0008022	1;1;1;1;1;1;1;1	GO:0030301;GO:0015031;GO:0006813;GO:0019067;GO:0006810;GO:0016197;GO:0032367;GO:0051301;GO:0033993;GO:0016032;GO:0032510;GO:0016044;GO:0006200;GO:0007032;GO:0007049	1;1;1;1;1;1;1;1;1;1;1;1;1;1;1	late endosome;late endosome membrane;nucleus;lysosome;endosome;vacuolar membrane;early endosome;cytoplasm;cytosol;endosome membrane;membrane	1;1;1;1;1;1;1;1;1;1;1	ATP binding;protein C-terminus binding;ATPase activity;hydrolase activity;nucleoside-triphosphatase activity;nucleotide binding;protein binding;ATPase activity, coupled	1;1;1;1;1;1;1;1	intracellular cholesterol transport;cell division;endosomal transport;cellular membrane organization;viral process;transport;endosome organization;response to lipid;protein transport;cell cycle;cholesterol transport;ATP catabolic process;endosome to lysosome transport via multivesicular body sorting pathway;viral assembly, maturation, egress, and release;potassium ion transport	1;1;1;1;1;1;1;1;1;1;1;1;1;1;1	O75351
3211	IPI:IPI00184533.1	Ubiquitin carboxyl-terminal hydrolase 11;Ubiquitin thioesterase 11;Ubiquitin-specific-processing protease 11;Deubiquitinating enzyme 11	USP11;UHX1	Ubiquitin carboxyl-terminal hydrolase 11	P51784	UBP11_HUMAN	1	20	20	18	19.9	17.5	109.82	963	0	0.0327255	0.749989	0	0.0154078	0.686954	6	0.999255	0.177563	0.875422	0.95343	FALSE	9.91516	0.0100192	0.0496543	TRUE	+				3211	;P51784(IPI00184533)	GO:0005737;GO:0005634	1;1	GO:0004843;GO:0008233;GO:0016787;GO:0008234;GO:0005515;GO:0004221;GO:0004197	1;1;1;1;1;1;1	GO:0006511;GO:0016579;GO:0006508	1;1;1	nucleus;cytoplasm	1;1	cysteine-type peptidase activity;ubiquitin-specific protease activity;peptidase activity;hydrolase activity;ubiquitin thiolesterase activity;cysteine-type endopeptidase activity;protein binding	1;1;1;1;1;1;1	proteolysis;protein deubiquitination;ubiquitin-dependent protein catabolic process	1;1;1	P51784
3247	IPI:IPI00215743.3;IPI:IPI00220967.1	Ribosome-binding protein 1;Ribosome receptor protein;180 kDa ribosome receptor homolog;ES/130-related protein	RRBP1;KIAA1398	Isoform 3 of Ribosome-binding protein 1;Isoform 1 of Ribosome-binding protein 1;Isoform 2 of Ribosome-binding protein 1	Q9P2E9-1;Q9P2E9;Q9P2E9-2;Q9P2E9-3	RRBP1_HUMAN	11	20	20	20	19	19	152.47	1410	0	0.00831364	0.242947	0	0.0168972	0.265371	6	0.999546	1.41064	0.293787	0.667551	FALSE	10.8827	0.00833813	0.0455367	TRUE	+				3247	;Q9P2E9(IPI00215743;IPI00220967)	GO:0005840;GO:0016020;GO:0005783;GO:0016021;GO:0030176;GO:0005789	1;1;1;1;1;1	GO:0004872	1	GO:0015031;GO:0007165;GO:0006412;GO:0006810	1;1;1;1	ribosome;integral to endoplasmic reticulum membrane;integral to membrane;endoplasmic reticulum membrane;endoplasmic reticulum;membrane	1;1;1;1;1;1	receptor activity	1	transport;signal transduction;protein transport;translation	1;1;1;1	Q9P2E9
3398	IPI:IPI00218200.8	B-cell receptor-associated protein 31;BCR-associated protein Bap31;p28 Bap31;Protein CDM;6C6-AG tumor-associated antigen	BCAP31;BAP31;DXS1357E	B-cell receptor-associated protein 31	P51572	BAP31_HUMAN	1	7	7	7	30.1	30.1	27.991	246	0	0.103867	0.402349	0	0.102545	0.404367	6	0.968597	5.13087	0.0359496	0.372441	FALSE	61.9294	0.000260637	0.0194783	TRUE	+				3398	;P51572(IPI00218200)	GO:0016020;GO:0005783;GO:0033116;GO:0000139;GO:0005887;GO:0005829;GO:0016021;GO:0005886;GO:0071556;GO:0005811;GO:0005789	1;1;1;1;1;1;1;1;1;1;1	GO:0005102;GO:0005515	1;1	GO:0015031;GO:0006915;GO:0035584;GO:0051561;GO:0006810;GO:0043280;GO:2001244;GO:0032471;GO:0006886;GO:0007283;GO:0002474;GO:0016192;GO:0006921;GO:0006955;GO:0007204	1;1;1;1;1;1;1;1;1;1;1;1;1;1;1	integral to lumenal side of endoplasmic reticulum membrane;endoplasmic reticulum-Golgi intermediate compartment membrane;Golgi membrane;integral to membrane;plasma membrane;endoplasmic reticulum membrane;integral to plasma membrane;endoplasmic reticulum;cytosol;lipid particle;membrane	1;1;1;1;1;1;1;1;1;1;1	receptor binding;protein binding	1;1	antigen processing and presentation of peptide antigen via MHC class I;intracellular protein transport;vesicle-mediated transport;reduction of endoplasmic reticulum calcium ion concentration;transport;cellular component disassembly involved in execution phase of apoptosis;spermatogenesis;apoptotic process;elevation of mitochondrial calcium ion concentration;calcium-mediated signaling using intrac…	1;1;1;1;1;1;1;1;1;1;1;1;1;1;1	P51572
3420	IPI:IPI00218493.7	Hypoxanthine-guanine phosphoribosyltransferase	HPRT1;HPRT	Hypoxanthine-guanine phosphoribosyltransferase	P00492	HPRT_HUMAN	1	11	11	11	58.3	58.3	24.579	218	0	0.0647802	0.242088	0	0.062468	0.252347	6	0.966026	8.56005	0.0133741	0.316271	FALSE	15.5087	0.0041319	0.0362273	TRUE	+				3420	;P00492(IPI00218493)	GO:0005737;GO:0005829	1;1	GO:0000287;GO:0052657;GO:0005515;GO:0000166;GO:0042802;GO:0042803;GO:0004422;GO:0046872;GO:0016757;GO:0016740	1;1;1;1;1;1;1;1;1;1	GO:0046083;GO:0009116;GO:0046040;GO:0007625;GO:0007610;GO:0001975;GO:0032263;GO:0044281;GO:0048813;GO:0045964;GO:0006168;GO:0006164;GO:0019835;GO:0043103;GO:0046651;GO:0051289;GO:0046100;GO:0032264;GO:0021895;GO:0055086;GO:0006166;GO:0042417;GO:0006144;GO:0006178;GO:0046038;GO:0021954;GO:0021756;GO:0043101	1;1;1;1;1;1;1;1;1;1;1;1;1;1;1;1;1;1;1;1;1;1;1;1;1;1;1;1	cytoplasm;cytosol	1;1	magnesium ion binding;transferase activity;protein homodimerization activity;identical protein binding;transferase activity, transferring glycosyl groups;nucleotide binding;guanine phosphoribosyltransferase activity;protein binding;metal ion binding;hypoxanthine phosphoribosyltransferase activity	1;1;1;1;1;1;1;1;1;1	hypoxanthine salvage;dendrite morphogenesis;response to amphetamine;adenine salvage;protein homotetramerization;adenine metabolic process;lymphocyte proliferation;nucleobase-containing small molecule metabolic process;IMP salvage;small molecule metabolic process;nucleoside metabolic process;IMP metabolic process;GMP catabolic process;central nervous system neuron development;guanine salvage;hypox…	1;1;1;1;1;1;1;1;1;1;1;1;1;1;1;1;1;1;1;1;1;1;1;1;1;1;1;1	P00492
3425	IPI:IPI00218568.7	Pterin-4-alpha-carbinolamine dehydratase;4-alpha-hydroxy-tetrahydropterin dehydratase;Phenylalanine hydroxylase-stimulating protein;Pterin carbinolamine dehydratase;Dimerization cofactor of hepatocyte nuclear factor 1-alpha	PCBD1;DCOH;PCBD	Pterin-4-alpha-carbinolamine dehydratase	P61457	PHS_HUMAN	1	5	5	5	49	49	11.999	104	0	0.0665488	0.82309	0	0.108944	0.802948	6	0.997348	1.19466	0.354683	0.711282	FALSE	25.4011	0.00154628	0.0318696	TRUE	+				3425	;P61457(IPI00218568)	GO:0005737;GO:0005730;GO:0005829;GO:0005634	1;1;1;1	GO:0008124;GO:0016829;GO:0004505;GO:0005515;GO:0042802;GO:0003713	1;1;1;1;1;1	GO:0006559;GO:0044281;GO:0045893;GO:0051291;GO:0006351;GO:0051289;GO:0006729;GO:0034641;GO:0006355;GO:0043496	1;1;1;1;1;1;1;1;1;1	nucleus;cytoplasm;cytosol;nucleolus	1;1;1;1	lyase activity;transcription coactivator activity;4-alpha-hydroxytetrahydrobiopterin dehydratase activity;identical protein binding;protein binding;phenylalanine 4-monooxygenase activity	1;1;1;1;1;1	protein homotetramerization;positive regulation of transcription, DNA-dependent;transcription, DNA-dependent;protein heterooligomerization;L-phenylalanine catabolic process;small molecule metabolic process;regulation of transcription, DNA-dependent;tetrahydrobiopterin biosynthetic process;cellular nitrogen compound metabolic process;regulation of protein homodimerization activity	1;1;1;1;1;1;1;1;1;1	P61457
3428	IPI:IPI00218620.1	SON protein;SON3;Negative regulatory element-binding protein;DBP-5;Bax antagonist selected in saccharomyces 1	SON;C21orf50;DBP5;KIAA1019;NREBP	Isoform D of Protein SON;Isoform I of Protein SON;Isoform F of Protein SON;Isoform G of Protein SON;Isoform A of Protein SON;Isoform C of Protein SON;Isoform B of Protein SON;Isoform J of Protein SON;SON protein;Isoform E of Protein SON	P18583-5;P18583;P18583-9;P18583-1;P18583-7;P18583-2;P18583-4;P18583-3;P18583-10;P18583-8;P18583-6	SON_HUMAN	10	25	25	25	15.8	15.8	267.05	2459	0	0.0167497	0.361311	0	0.0272564	0.348388	6	0.999156	1.09268	0.388594	0.733233	FALSE	10.2713	0.00934597	0.0480774	TRUE	+				3428	;P18583(IPI00218620)	GO:0005730;GO:0005634;GO:0016607	1;1;1	GO:0003677;GO:0003723;GO:0005515;GO:0003676;GO:0050733	1;1;1;1;1	GO:0051726;GO:0006397;GO:0000226;GO:0000910;GO:0043066;GO:0008380;GO:0043484;GO:0007049	1;1;1;1;1;1;1;1	nuclear speck;nucleus;nucleolus	1;1;1	DNA binding;RS domain binding;RNA binding;protein binding;nucleic acid binding	1;1;1;1;1	microtubule cytoskeleton organization;regulation of cell cycle;RNA splicing;negative regulation of apoptotic process;regulation of RNA splicing;cytokinesis;mRNA processing;cell cycle	1;1;1;1;1;1;1;1	P18583
3431	IPI:IPI00218682.1	Prolyl 4-hydroxylase subunit alpha-1;4-PH alpha-1;Procollagen-proline,2-oxoglutarate-4-dioxygenase subunit alpha-1	P4HA1;P4HA	Isoform 2 of Prolyl 4-hydroxylase subunit alpha-1;Isoform 1 of Prolyl 4-hydroxylase subunit alpha-1	P13674-2;P13674;P13674-1	P4HA1_HUMAN	2	17	17	17	36.9	36.9	60.966	534	0	0.134951	0.832811	0	0.154234	0.853516	6	0.988541	5.20818	0.0349452	0.372441	FALSE	14.7981	0.00453549	0.0373904	TRUE	+				3431	;P13674(IPI00218682)	GO:0005788;GO:0005783;GO:0005739;GO:0043231	1;1;1;1	GO:0005506;GO:0031418;GO:0016705;GO:0004656;GO:0016706;GO:0016491;GO:0016702;GO:0046872	1;1;1;1;1;1;1;1	GO:0030199;GO:0018401;GO:0055114	1;1;1	mitochondrion;intracellular membrane-bounded organelle;endoplasmic reticulum;endoplasmic reticulum lumen	1;1;1;1	oxidoreductase activity, acting on single donors with incorporation of molecular oxygen, incorporation of two atoms of oxygen;procollagen-proline 4-dioxygenase activity;oxidoreductase activity, acting on paired donors, with incorporation or reduction of molecular oxygen, 2-oxoglutarate as one donor, and incorporation of one atom each of oxygen into both donors;oxidoreductase activity;L-ascorbic a…	1;1;1;1;1;1;1;1	oxidation-reduction process;peptidyl-proline hydroxylation to 4-hydroxy-L-proline;collagen fibril organization	1;1;1	P13674
3434	IPI:IPI00218733.6	Superoxide dismutase [Cu-Zn]	SOD1	Superoxide dismutase [Cu-Zn]	P00441	SODC_HUMAN	1	13	13	13	86.4	86.4	15.936	154	0	0.0725628	0.392313	0	0.0731589	0.387646	6	0.984778	12.5086	0.00633057	0.309054	FALSE	11.3245	0.00770757	0.0442336	TRUE	+				3434	;P00441(IPI00218733)	GO:0005759;GO:0005615;GO:0031410;GO:0005777;GO:0005737;GO:0043025;GO:0005730;GO:0005829;GO:0005576;GO:0005739;GO:0005886;GO:0031012;GO:0032839;GO:0005634;GO:0043234	1;1;1;1;1;1;1;1;1;1;1;1;1;1;1	GO:0004784;GO:0048365;GO:0051087;GO:0016209;GO:0005515;GO:0005507;GO:0008270;GO:0016491;GO:0042803;GO:0046872;GO:0030346	1;1;1;1;1;1;1;1;1;1;1	GO:0046620;GO:0006801;GO:0032930;GO:0000303;GO:0007596;GO:0002262;GO:0060087;GO:0007566;GO:0008090;GO:0019430;GO:0009408;GO:0006979;GO:0006749;GO:0001975;GO:0008089;GO:0060052;GO:0040014;GO:0030168;GO:0055114;GO:0000302;GO:0032287;GO:0007569;GO:0001895;GO:0046688;GO:0046716;GO:0007568;GO:0050665;GO:0008217;GO:0006879;GO:0045859;GO:0001890;GO:0001819;GO:0045471;GO:0033081;GO:0006302;GO:0002576;GO:…	1;1;1;1;1;1;1;1;1;1;1;1;1;1;1;1;1;1;1;1;1;1;1;1;1;1;1;1;1;1;1;1;1;1;1;1;1;1;1;1;1;1;1;1;1;1;1;1;1;1;1;1;1;1;1;1;1;1;1;1;1	neuronal cell body;extracellular matrix;mitochondrion;extracellular space;nucleus;plasma membrane;mitochondrial matrix;peroxisome;protein complex;cytoplasm;cytosol;cytoplasmic vesicle;dendrite cytoplasm;extracellular region;nucleolus	1;1;1;1;1;1;1;1;1;1;1;1;1;1;1	copper ion binding;protein phosphatase 2B binding;oxidoreductase activity;protein homodimerization activity;chaperone binding;Rac GTPase binding;protein binding;superoxide dismutase activity;zinc ion binding;antioxidant activity;metal ion binding	1;1;1;1;1;1;1;1;1;1;1	platelet degranulation;response to reactive oxygen species;oxidation-reduction process;retina homeostasis;neurofilament cytoskeleton organization;myeloid cell homeostasis;response to amphetamine;cell death;removal of superoxide radicals;positive regulation of superoxide anion generation;response to nutrient levels;platelet activation;activation of MAPK activity;positive regulation of catalytic ac…	1;1;1;1;1;1;1;1;1;1;1;1;1;1;1;1;1;1;1;1;1;1;1;1;1;1;1;1;1;1;1;1;1;1;1;1;1;1;1;1;1;1;1;1;1;1;1;1;1;1;1;1;1;1;1;1;1;1;1;1;1	P00441
3455	IPI:IPI00219034.3	NADH dehydrogenase [ubiquinone] 1 alpha subcomplex subunit 8;NADH-ubiquinone oxidoreductase 19 kDa subunit;Complex I-19kD;Complex I-PGIV	NDUFA8	NADH dehydrogenase [ubiquinone] 1 alpha subcomplex subunit 8	P51970	NDUA8_HUMAN	1	10	10	10	63.4	63.4	20.105	172	0	0.0490879	0.256281	0	0.0640155	0.264335	6	0.983587	1.76147	0.220219	0.615843	FALSE	23.5934	0.00179164	0.0330512	TRUE	+				3455	;P51970(IPI00219034)	GO:0005747;GO:0005739;GO:0005758;GO:0005743;GO:0070469	1;1;1;1;1	GO:0008137	1	GO:0044237;GO:0044281;GO:0006120;GO:0022900;GO:0022904	1;1;1;1;1	mitochondrion;mitochondrial inner membrane;mitochondrial intermembrane space;respiratory chain;mitochondrial respiratory chain complex I	1;1;1;1;1	NADH dehydrogenase (ubiquinone) activity	1	small molecule metabolic process;respiratory electron transport chain;electron transport chain;mitochondrial electron transport, NADH to ubiquinone;cellular metabolic process	1;1;1;1;1	P51970
3474	IPI:IPI00219219.3	Galectin-1;Lectin galactoside-binding soluble 1;Beta-galactoside-binding lectin L-14-I;S-Lac lectin 1;Galaptin;14 kDa lectin;HPL;HBL;Putative MAPK-activating protein PM12	LGALS1	Galectin-1	P09382	LEG1_HUMAN	1	9	9	9	61.5	61.5	14.716	135	0	-0.030581	0.479173	0	-0.0108657	0.480395	6	0.998569	-0.218557	0.84727	0.942469	FALSE	80.2752	0.000155145	0.0189578	TRUE	+				3474	;P09382(IPI00219219)	GO:0005615;GO:0005737;GO:0005576;GO:0031012;GO:0005634;GO:0005622;GO:0005578;GO:0009986	1;1;1;1;1;1;1;1	GO:0030395;GO:0016936;GO:0004871;GO:0043236;GO:0042803;GO:0030246;GO:0001948	1;1;1;1;1;1;1	GO:0045445;GO:0007165;GO:0006915;GO:0071333;GO:0034120;GO:0010812;GO:0002317;GO:0033555;GO:0042493;GO:0031295;GO:0071407;GO:0010977;GO:0048678;GO:0043123;GO:0042981	1;1;1;1;1;1;1;1;1;1;1;1;1;1;1	extracellular matrix;extracellular space;proteinaceous extracellular matrix;nucleus;intracellular;cytoplasm;extracellular region;cell surface	1;1;1;1;1;1;1;1	carbohydrate binding;glycoprotein binding;laminin binding;lactose binding;protein homodimerization activity;galactoside binding;signal transducer activity	1;1;1;1;1;1;1	negative regulation of cell-substrate adhesion;response to drug;positive regulation of I-kappaB kinase/NF-kappaB cascade;apoptotic process;negative regulation of neuron projection development;signal transduction;plasma cell differentiation;cellular response to organic cyclic compound;cellular response to glucose stimulus;positive regulation of erythrocyte aggregation;regulation of apoptotic proce…	1;1;1;1;1;1;1;1;1;1;1;1;1;1;1	P09382
3550	IPI:IPI00220301.5	Peroxiredoxin-6;Antioxidant protein 2;1-Cys peroxiredoxin;Acidic calcium-independent phospholipase A2;Non-selenium glutathione peroxidase;24 kDa protein;Liver 2D page spot 40;Red blood cells page spot 12	PRDX6;AOP2;KIAA0106	Peroxiredoxin-6	P30041	PRDX6_HUMAN	1	15	15	15	64.7	64.7	25.035	224	0	-0.0155048	0.12111	0	0.0330159	0.132482	6	0.994615	0.451474	0.695881	0.890674	FALSE	11.2435	0.0078177	0.0442336	TRUE	+				3550	;P30041(IPI00220301)	GO:0031410;GO:0016023;GO:0005737;GO:0005829;GO:0005764	1;1;1;1;1	GO:0004602;GO:0016209;GO:0005515;GO:0016787;GO:0016491;GO:0003824;GO:0004623;GO:0051920;GO:0004601	1;1;1;1;1;1;1;1;1	GO:0009395;GO:0008152;GO:0006979;GO:0006629;GO:0055114;GO:0042744;GO:0016042	1;1;1;1;1;1;1	lysosome;cytoplasm;cytosol;cytoplasmic vesicle;cytoplasmic membrane-bounded vesicle	1;1;1;1;1	phospholipase A2 activity;catalytic activity;oxidoreductase activity;peroxiredoxin activity;hydrolase activity;peroxidase activity;glutathione peroxidase activity;protein binding;antioxidant activity	1;1;1;1;1;1;1;1;1	oxidation-reduction process;hydrogen peroxide catabolic process;lipid metabolic process;lipid catabolic process;response to oxidative stress;phospholipid catabolic process;metabolic process	1;1;1;1;1;1;1	P30041
3556	IPI:IPI00220362.5	10 kDa heat shock protein, mitochondrial;10 kDa chaperonin;CPN10;Early-pregnancy factor	HSPE1	10 kDa heat shock protein, mitochondrial	P61604	CH10_HUMAN	1	15	15	15	93.1	93.1	10.932	102	0	0.103475	0.967418	0	0.122278	0.966242	6	0.995245	4.67214	0.0428854	0.384802	FALSE	75.7849	0.000174069	0.0189578	TRUE	+				3556	;P61604(IPI00220362)	GO:0005759;GO:0005737;GO:0005739	1;1;1	GO:0005524;GO:0051087;GO:0005515;GO:0051082	1;1;1;1	GO:0006457;GO:0006919;GO:0006986;GO:0006950	1;1;1;1	mitochondrion;mitochondrial matrix;cytoplasm	1;1;1	ATP binding;chaperone binding;unfolded protein binding;protein binding	1;1;1;1	response to unfolded protein;protein folding;response to stress;activation of cysteine-type endopeptidase activity involved in apoptotic process	1;1;1;1	P61604
3574	IPI:IPI00220637.5	Seryl-tRNA synthetase, cytoplasmic;Seryl-tRNA(Ser/Sec) synthetase;Serine--tRNA ligase	SARS;SERS	Seryl-tRNA synthetase, cytoplasmic	P49591	SYSC_HUMAN	1	25	25	25	52.7	52.7	58.777	514	0	0.0559743	0.227291	0	0.0934199	0.243231	6	0.971672	2.04244	0.177849	0.581685	FALSE	12.7083	0.00613499	0.041033	TRUE	+				3574	;P49591(IPI00220637)	GO:0005737;GO:0005829;GO:0005739	1;1;1	GO:0003723;GO:0004828;GO:0005524;GO:0016874;GO:0000166;GO:0004812	1;1;1;1;1;1	GO:0006418;GO:0006412;GO:0008033;GO:0097056;GO:0006434;GO:0010467	1;1;1;1;1;1	mitochondrion;cytoplasm;cytosol	1;1;1	ATP binding;serine-tRNA ligase activity;RNA binding;aminoacyl-tRNA ligase activity;nucleotide binding;ligase activity	1;1;1;1;1;1	tRNA processing;tRNA aminoacylation for protein translation;seryl-tRNA aminoacylation;gene expression;translation;selenocysteinyl-tRNA(Sec) biosynthetic process	1;1;1;1;1;1	P49591
3605	IPI:IPI00399266.1;IPI:IPI00399268.1;IPI:IPI00221178.1	Tumor protein D54;Tumor protein D52-like 2	TPD52L2	Isoform 3 of Tumor protein D54;Isoform 4 of Tumor protein D54;Isoform 2 of Tumor protein D54	O43399-3;O43399;O43399-4;O43399-2	TPD54_HUMAN	3	10	10	2	53.1	6.2	22.517	209	0	0.146716	0.625625	0	0.205096	0.645006	6	0.97454	3.49877	0.0728732	0.43694	FALSE	13.6059	0.00535852	0.0384265	TRUE	+				3605	;O43399(IPI00221178;IPI00399266;IPI00399268)	GO:0005737;GO:0048471	1;1	GO:0005515;GO:0042803	1;1	GO:0042127	1	perinuclear region of cytoplasm;cytoplasm	1;1	protein homodimerization activity;protein binding	1;1	regulation of cell proliferation	1	O43399
3607	IPI:IPI00221226.7	Annexin A6;Annexin-6;Annexin VI;Lipocortin VI;p68;p70;Protein III;Chromobindin-20;67 kDa calelectrin;Calphobindin-II	ANXA6;ANX6	Annexin A6	P08133	ANXA6_HUMAN	1	58	58	58	69.1	69.1	75.872	673	0	0.107476	0.799316	0	0.108521	0.812895	6	0.992298	10.9093	0.00829798	0.309054	FALSE	58.7766	0.000289336	0.0194884	TRUE	+				3607	;P08133(IPI00221226)	GO:0042470;GO:0005737;GO:0070062;GO:0048471	1;1;1;1	GO:0005544;GO:0005515;GO:0005509	1;1;1	GO:0006816;GO:0006937	1;1	melanosome;perinuclear region of cytoplasm;cytoplasm;extracellular vesicular exosome	1;1;1;1	calcium-dependent phospholipid binding;protein binding;calcium ion binding	1;1;1	regulation of muscle contraction;calcium ion transport	1;1	P08133
3609	IPI:IPI00307017.2;IPI:IPI00221240.3;IPI:IPI00221241.3	Leucyl-cystinyl aminopeptidase;Oxytocinase;Insulin-regulated membrane aminopeptidase;Insulin-responsive aminopeptidase;Placental leucine aminopeptidase;Leucyl-cystinyl aminopeptidase, pregnancy serum form	LNPEP;OTASE	Isoform 1 of Leucyl-cystinyl aminopeptidase;Isoform 2 of Leucyl-cystinyl aminopeptidase;Isoform 3 of Leucyl-cystinyl aminopeptidase	Q9UIQ6-1;Q9UIQ6;Q9UIQ6-2;Q9UIQ6-3	LCAP_HUMAN	3	20	20	20	17.8	17.8	117.35	1025	0	0.0281133	0.153581	0	0.0190301	0.158406	6	0.985114	1.02394	0.413543	0.742786	FALSE	10.9622	0.00821907	0.0451892	TRUE	+				3609	;Q9UIQ6(IPI00307017;IPI00221240;IPI00221241)	GO:0016020;GO:0005887;GO:0005829;GO:0016021;GO:0005576;GO:0005886;GO:0030659;GO:0031905;GO:0005622;GO:0048471	1;1;1;1;1;1;1;1;1;1	GO:0008233;GO:0016787;GO:0004177;GO:0008237;GO:0008270;GO:0046872	1;1;1;1;1;1	GO:0002480;GO:0042590;GO:0007267;GO:0030163;GO:0000209;GO:0007565;GO:0006508;GO:0016044;GO:0002474	1;1;1;1;1;1;1;1;1	cytoplasmic vesicle membrane;integral to membrane;plasma membrane;integral to plasma membrane;early endosome lumen;intracellular;perinuclear region of cytoplasm;cytosol;extracellular region;membrane	1;1;1;1;1;1;1;1;1;1	metallopeptidase activity;peptidase activity;hydrolase activity;aminopeptidase activity;zinc ion binding;metal ion binding	1;1;1;1;1;1	antigen processing and presentation of peptide antigen via MHC class I;protein catabolic process;cell-cell signaling;cellular membrane organization;antigen processing and presentation of exogenous peptide antigen via MHC class I;antigen processing and presentation of exogenous peptide antigen via MHC class I, TAP-independent;protein polyubiquitination;proteolysis;female pregnancy	1;1;1;1;1;1;1;1;1	Q9UIQ6
3656	IPI:IPI00257508.4	Dihydropyrimidinase-related protein 2;Collapsin response mediator protein 2;N2A3	DPYSL2;CRMP2	Dihydropyrimidinase-related protein 2	Q16555	DPYL2_HUMAN	1	23	23	8	54.9	16.8	62.293	572	0	0.0743251	0.439347	0	0.0701959	0.429122	6	0.987434	9.0181	0.0120739	0.316271	FALSE	10.169	0.00953232	0.0486405	TRUE	+				3656	;Q16555(IPI00257508)	GO:0030425;GO:0005737;GO:0043025;GO:0030426;GO:0005829;GO:0005739;GO:0030424;GO:0043005;GO:0043234	1;1;1;1;1;1;1;1;1	GO:0019901;GO:0016812;GO:0004157;GO:0016787;GO:0005515;GO:0016810	1;1;1;1;1;1	GO:0007420;GO:0014049;GO:0021772;GO:0007165;GO:0001975;GO:0006208;GO:0007399;GO:0048489;GO:0021510;GO:0045664;GO:0042220;GO:0007411;GO:0042493;GO:0030154;GO:0006139;GO:0007275;GO:0007010	1;1;1;1;1;1;1;1;1;1;1;1;1;1;1;1;1	neuronal cell body;mitochondrion;neuron projection;dendrite;axon;protein complex;cytoplasm;cytosol;growth cone	1;1;1;1;1;1;1;1;1	hydrolase activity, acting on carbon-nitrogen (but not peptide) bonds;protein kinase binding;hydrolase activity;dihydropyrimidinase activity;protein binding;hydrolase activity, acting on carbon-nitrogen (but not peptide) bonds, in cyclic amides	1;1;1;1;1;1	cell differentiation;synaptic vesicle transport;pyrimidine nucleobase catabolic process;response to amphetamine;olfactory bulb development;spinal cord development;response to cocaine;nervous system development;response to drug;cytoskeleton organization;regulation of neuron differentiation;axon guidance;signal transduction;nucleobase-containing compound metabolic process;multicellular organismal d…	1;1;1;1;1;1;1;1;1;1;1;1;1;1;1;1;1	Q16555
3658	IPI:IPI00657648.1;IPI:IPI00259102.2	Mammalian ependymin-related protein 1;Upregulated in colorectal cancer gene 1 protein	EPDR1;MERP1;UCC1	ependymin related protein 1 precursor;Isoform 1 of Mammalian ependymin-related protein 1	Q9UM22-2;Q9UM22;Q9UM22-1	EPDR1_HUMAN	2	4	4	4	11.9	11.9	38.15	344	0	0.12994	0.655497	0	0.119379	0.608559	6	0.982323	1.31104	0.32015	0.68357	FALSE	12.7714	0.00607503	0.0409917	TRUE	+				3658	;Q9UM22(IPI00657648)	GO:0005576;GO:0005764	1;1	GO:0005509	1	GO:0007160	1	lysosome;extracellular region	1;1	calcium ion binding	1	cell-matrix adhesion	1	Q9UM22
3704	IPI:IPI00290566.1	T-complex protein 1 subunit alpha;CCT-alpha	CCT1;CCTA;TCP1	T-complex protein 1 subunit alpha	P17987	TCPA_HUMAN	1	43	43	43	79.1	79.1	60.343	556	0	0.0757456	0.306804	0	0.0741582	0.295648	6	0.971516	11.2406	0.00782173	0.309054	FALSE	21.9689	0.00206555	0.0330512	TRUE	+				3704	;P17987(IPI00290566)	GO:0005874;GO:0030054;GO:0005737;GO:0005832;GO:0005730;GO:0000242;GO:0005829;GO:0000792;GO:0005886;GO:0002199;GO:0005720;GO:0005856;GO:0005815;GO:0005634;GO:0001669;GO:0005813;GO:0005794	1;1;1;1;1;1;1;1;1;1;1;1;1;1;1;1;1	GO:0005524;GO:0000166;GO:0051082	1;1;1	GO:0007021;GO:0006457;GO:0007339;GO:0044267;GO:0051084	1;1;1;1;1	nuclear heterochromatin;microtubule organizing center;cell junction;nucleus;plasma membrane;acrosomal vesicle;Golgi apparatus;zona pellucida receptor complex;centrosome;chaperonin-containing T-complex;cytoplasm;cytosol;nucleolus;cytoskeleton;heterochromatin;microtubule;pericentriolar material	1;1;1;1;1;1;1;1;1;1;1;1;1;1;1;1;1	ATP binding;unfolded protein binding;nucleotide binding	1;1;1	protein folding;binding of sperm to zona pellucida;cellular protein metabolic process;tubulin complex assembly;'de novo' posttranslational protein folding	1;1;1;1;1	P17987
3716	IPI:IPI00291006.2	Malate dehydrogenase, mitochondrial	MDH2	Malate dehydrogenase, mitochondrial	P40926	MDHM_HUMAN	1	20	20	20	63.3	63.3	35.503	338	0	0.01082	0.149281	0	0.0452349	0.151683	6	0.997886	1.28717	0.326892	0.687584	FALSE	11.3841	0.00762806	0.0442336	TRUE	+				3716	;P40926(IPI00291006)	GO:0005759;GO:0005730;GO:0005739;GO:0005886;GO:0005634;GO:0005743	1;1;1;1;1;1	GO:0043621;GO:0016491;GO:0016616;GO:0003824;GO:0046554;GO:0016615;GO:0030060	1;1;1;1;1;1;1	GO:0044237;GO:0006006;GO:0006094;GO:0044262;GO:0055114;GO:0044281;GO:0006107;GO:0005975;GO:0006734;GO:0006475;GO:0006099;GO:0006108	1;1;1;1;1;1;1;1;1;1;1;1	mitochondrion;mitochondrial inner membrane;nucleus;plasma membrane;mitochondrial matrix;nucleolus	1;1;1;1;1;1	oxidoreductase activity, acting on the CH-OH group of donors, NAD or NADP as acceptor;catalytic activity;oxidoreductase activity;protein self-association;L-malate dehydrogenase activity;malate dehydrogenase activity;malate dehydrogenase (NADP+) activity	1;1;1;1;1;1;1	oxidation-reduction process;glucose metabolic process;cellular carbohydrate metabolic process;gluconeogenesis;oxaloacetate metabolic process;small molecule metabolic process;internal protein amino acid acetylation;NADH metabolic process;tricarboxylic acid cycle;malate metabolic process;cellular metabolic process;carbohydrate metabolic process	1;1;1;1;1;1;1;1;1;1;1;1	P40926
3758	IPI:IPI00291922.2	Proteasome subunit alpha type-5;Proteasome zeta chain;Macropain zeta chain;Multicatalytic endopeptidase complex zeta chain	PSMA5	Proteasome subunit alpha type-5	P28066	PSA5_HUMAN	1	14	14	14	71.4	71.4	26.411	241	0	-0.00834617	0.138089	0	0.00310066	0.136632	6	0.998712	0.128114	0.909779	0.969112	FALSE	13.1139	0.00576458	0.0399827	TRUE	+				3758	;P28066(IPI00291922)	GO:0019773;GO:0000502;GO:0005737;GO:0005730;GO:0005829;GO:0005634;GO:0005654;GO:0005839	1;1;1;1;1;1;1;1	GO:0008233;GO:0005515;GO:0016787;GO:0004175;GO:0004298	1;1;1;1;1	GO:0006915;GO:0042590;GO:0000278;GO:0006521;GO:0044281;GO:0006511;GO:0016070;GO:0051436;GO:0031145;GO:0016071;GO:0051603;GO:0000209;GO:0043066;GO:0016032;GO:0034641;GO:0006508;GO:0002479;GO:0000082;GO:0051439;GO:0002474;GO:0051437;GO:0010467;GO:0006977;GO:0042981	1;1;1;1;1;1;1;1;1;1;1;1;1;1;1;1;1;1;1;1;1;1;1;1	proteasome core complex;nucleoplasm;proteasome complex;nucleus;cytoplasm;cytosol;nucleolus;proteasome core complex, alpha-subunit complex	1;1;1;1;1;1;1;1	endopeptidase activity;peptidase activity;hydrolase activity;threonine-type endopeptidase activity;protein binding	1;1;1;1;1	antigen processing and presentation of peptide antigen via MHC class I;mitotic cell cycle;anaphase-promoting complex-dependent proteasomal ubiquitin-dependent protein catabolic process;DNA damage response, signal transduction by p53 class mediator resulting in cell cycle arrest;positive regulation of ubiquitin-protein ligase activity involved in mitotic cell cycle;antigen processing and presentat…	1;1;1;1;1;1;1;1;1;1;1;1;1;1;1;1;1;1;1;1;1;1;1;1	P28066
3759	IPI:IPI00291928.8	Ras-related protein Rab-14	RAB14	Ras-related protein Rab-14	P61106	RAB14_HUMAN	1	19	19	17	84.7	78.6	23.897	215	0	0.0683289	0.366841	0	0.0620702	0.36596	6	0.984546	8.86598	0.012484	0.316271	FALSE	203.133	2.42338e-05	0.0130872	TRUE	+				3759	;P61106(IPI00291928)	GO:0016020;GO:0042175;GO:0005770;GO:0031410;GO:0005791;GO:0000139;GO:0045335;GO:0005795;GO:0005829;GO:0005886;GO:0005769;GO:0055037;GO:0030659;GO:0030140;GO:0005622;GO:0030670;GO:0005764;GO:0048471;GO:0005768;GO:0031901;GO:0005794	1;1;1;1;1;1;1;1;1;1;1;1;1;1;1;1;1;1;1;1;1	GO:0005515;GO:0000166;GO:0019003;GO:0003924;GO:0005525	1;1;1;1;1	GO:0007269;GO:0008543;GO:0015031;GO:0006184;GO:0009790;GO:0006895;GO:0007264;GO:0006810;GO:0046907;GO:0032880;GO:0016044;GO:0016192;GO:0032456	1;1;1;1;1;1;1;1;1;1;1;1;1	cytoplasmic vesicle membrane;trans-Golgi network transport vesicle;late endosome;recycling endosome;Golgi membrane;nuclear outer membrane-endoplasmic reticulum membrane network;Golgi stack;plasma membrane;early endosome membrane;lysosome;endosome;phagocytic vesicle membrane;Golgi apparatus;intracellular;perinuclear region of cytoplasm;early endosome;phagocytic vesicle;cytosol;cytoplasmic vesicle;…	1;1;1;1;1;1;1;1;1;1;1;1;1;1;1;1;1;1;1;1;1	GDP binding;GTP binding;GTPase activity;nucleotide binding;protein binding	1;1;1;1;1	intracellular transport;Golgi to endosome transport;GTP catabolic process;cellular membrane organization;vesicle-mediated transport;transport;regulation of protein localization;endocytic recycling;fibroblast growth factor receptor signaling pathway;protein transport;neurotransmitter secretion;embryo development;small GTPase mediated signal transduction	1;1;1;1;1;1;1;1;1;1;1;1;1	P61106
3766	IPI:IPI00856116.1;IPI:IPI00856001.1;IPI:IPI00292009.9	Palladin;Sarcoma antigen NY-SAR-77;SIH002	PALLD;KIAA0992;CGI-151	Isoform 1 of Palladin;Isoform 5 of Palladin;Isoform 2 of Palladin;Isoform 3 of Palladin;Isoform 4 of Palladin	Q8WX93-1;Q8WX93;Q8WX93-5;Q8WX93-2;Q8WX93-3;Q8WX93-4	PALLD_HUMAN	7	5	5	5	4.2	4.2	150.54	1383	0	-0.0343375	0.440509	0	-0.0361999	0.436846	6	0.997896	-3.17925	0.0863179	0.469532	FALSE	18.1381	0.0030258	0.0347039	TRUE	+				3766	;Q8WX93(IPI00292009;IPI00856116;IPI00856001)	GO:0042995;GO:0030054;GO:0005737;GO:0030018;GO:0005856;GO:0005634;GO:0005925;GO:0030027;GO:0005884;GO:0001726	1;1;1;1;1;1;1;1;1;1	GO:0005515;GO:0051371;GO:0003779	1;1;1	GO:0007010	1	Z disc;cell junction;focal adhesion;nucleus;cell projection;cytoplasm;actin filament;cytoskeleton;lamellipodium;ruffle	1;1;1;1;1;1;1;1;1;1	muscle alpha-actinin binding;actin binding;protein binding	1;1;1	cytoskeleton organization	1	Q8WX93
3853	IPI:IPI00386114.1;IPI:IPI00294627.3;IPI:IPI00386117.3;IPI:IPI00386120.3;IPI:IPI00386118.3	Splicing factor 1;Zinc finger protein 162;Transcription factor ZFM1;Zinc finger gene in MEN1 locus;Mammalian branch point-binding protein mBBP	SF1;ZFM1;ZNF162	Isoform 1 of Splicing factor 1;Isoform 2 of Splicing factor 1;Isoform 3 of Splicing factor 1;Isoform 6 of Splicing factor 1;Isoform 4 of Splicing factor 1	Q15637-1;Q15637;Q15637-2;Q15637-3;Q15637-6;Q15637-4	SF01_HUMAN	5	9	9	1	24.1	2.3	68.329	639	0	-0.0280673	0.0885156	0	-0.0297412	0.0925578	6	0.97304	-1.26091	0.334508	0.691364	FALSE	14.6112	0.00465144	0.0374517	TRUE	+				3853	;Q15637(IPI00294627;IPI00386120;IPI00386114;IPI00386117)	GO:0005840;GO:0005730;GO:0005681;GO:0005634	1;1;1;1	GO:0003723;GO:0003714;GO:0008270;GO:0003676;GO:0046872	1;1;1;1;1	GO:0050810;GO:0033327;GO:0000389;GO:0006397;GO:0006351;GO:0000398;GO:0008380;GO:0030238;GO:0006355;GO:0022402;GO:0000245	1;1;1;1;1;1;1;1;1;1;1	ribosome;nucleus;spliceosomal complex;nucleolus	1;1;1;1	transcription corepressor activity;RNA binding;zinc ion binding;metal ion binding;nucleic acid binding	1;1;1;1;1	transcription, DNA-dependent;Leydig cell differentiation;regulation of steroid biosynthetic process;regulation of transcription, DNA-dependent;RNA splicing;mRNA 3'-splice site recognition;male sex determination;mRNA processing;spliceosomal complex assembly;cell cycle process;mRNA splicing, via spliceosome	1;1;1;1;1;1;1;1;1;1;1	Q15637
3877	IPI:IPI00295400.1	Tryptophanyl-tRNA synthetase, cytoplasmic;Tryptophan--tRNA ligase;Interferon-induced protein 53	WARS;IFI53;WRS	Isoform 1 of Tryptophanyl-tRNA synthetase, cytoplasmic;tryptophanyl-tRNA synthetase isoform b	P23381-1;P23381;P23381-2	SYWC_HUMAN	2	19	19	19	50.5	50.5	53.165	471	0	0.0931556	0.377614	0	0.129226	0.382211	6	0.971565	2.28522	0.14966	0.554596	FALSE	22.2823	0.00200804	0.0330512	TRUE	+				3877	;P23381(IPI00295400)	GO:0005737;GO:0005829	1;1	GO:0004830;GO:0005524;GO:0016874;GO:0005515;GO:0000166;GO:0004812	1;1;1;1;1;1	GO:0008285;GO:0001525;GO:0006418;GO:0006436;GO:0006412;GO:0045765;GO:0010467	1;1;1;1;1;1;1	cytoplasm;cytosol	1;1	ATP binding;aminoacyl-tRNA ligase activity;tryptophan-tRNA ligase activity;nucleotide binding;ligase activity;protein binding	1;1;1;1;1;1	negative regulation of cell proliferation;tRNA aminoacylation for protein translation;tryptophanyl-tRNA aminoacylation;regulation of angiogenesis;gene expression;translation;angiogenesis	1;1;1;1;1;1;1	P23381
3886	IPI:IPI00295849.3	Geranylgeranyl transferase type-2 subunit beta;Geranylgeranyl transferase type II subunit beta;Type II protein geranyl-geranyltransferase subunit beta;Rab geranylgeranyltransferase subunit beta;Rab geranyl-geranyltransferase subunit beta	RABGGTB;GGTB	Geranylgeranyl transferase type-2 subunit beta	P53611	PGTB2_HUMAN	1	3	3	3	9.7	9.7	36.924	331	0	0.0424526	0.246029	0	0.0572799	0.248769	6	0.986889	2.40613	0.137884	0.547737	FALSE	12.0422	0.0068253	0.0430989	TRUE	+				3886	;P53611(IPI00295849)			GO:0004659;GO:0005515;GO:0003824;GO:0046872;GO:0016740;GO:0004663	1;1;1;1;1;1	GO:0007601;GO:0018344;GO:0006464	1;1;1			transferase activity;catalytic activity;prenyltransferase activity;Rab geranylgeranyltransferase activity;protein binding;metal ion binding	1;1;1;1;1;1	visual perception;protein geranylgeranylation;cellular protein modification process	1;1;1	P53611
3887	IPI:IPI00295851.4	Coatomer subunit beta;Beta-coat protein	COPB1;COPB;MSTP026	Coatomer subunit beta	P53618	COPB_HUMAN	1	34	34	34	41.1	41.1	107.14	953	0	0.00176106	0.247374	0	0.0225277	0.237645	6	0.999981	0.82363	0.496734	0.786827	FALSE	9.93927	0.00997143	0.0495466	TRUE	+				3887	;P53618(IPI00295851)	GO:0016020;GO:0031410;GO:0030137;GO:0005737;GO:0000139;GO:0030663;GO:0005829;GO:0005798;GO:0005886;GO:0030126;GO:0005793;GO:0030117;GO:0005794	1;1;1;1;1;1;1;1;1;1;1;1;1	GO:0005515;GO:0005198	1;1	GO:0015031;GO:0006891;GO:0006810;GO:0048205;GO:0006886;GO:0016044;GO:0016192;GO:0006890;GO:0019048	1;1;1;1;1;1;1;1;1	endoplasmic reticulum-Golgi intermediate compartment;COPI-coated vesicle membrane;Golgi membrane;Golgi-associated vesicle;COPI-coated vesicle;COPI vesicle coat;plasma membrane;membrane coat;Golgi apparatus;cytoplasm;cytosol;cytoplasmic vesicle;membrane	1;1;1;1;1;1;1;1;1;1;1;1;1	protein binding;structural molecule activity	1;1	intracellular protein transport;cellular membrane organization;vesicle-mediated transport;transport;COPI coating of Golgi vesicle;protein transport;modulation by virus of host morphology or physiology;intra-Golgi vesicle-mediated transport;retrograde vesicle-mediated transport, Golgi to ER	1;1;1;1;1;1;1;1;1	P53618
3926	IPI:IPI00297121.5	UPF0549 protein C20orf43	C20orf43;AD-007;CDA05;HSPC164;HSPC169	UPF0549 protein C20orf43	Q9BY42	CT043_HUMAN	1	9	9	9	31.7	31.7	33.854	306	0	0.0373466	0.421679	0	-0.00563717	0.425904	6	0.996795	-0.0654543	0.953766	0.982513	FALSE	71.8012	0.000193915	0.0189578	TRUE	+				3926	;Q9BY42(IPI00297121)	GO:0005575	1	GO:0003674	1	GO:0008150	1	cellular_component	1	molecular_function	1	biological_process	1	Q9BY42
3931	IPI:IPI00297211.1	SWI/SNF-related matrix-associated actin-dependent regulator of chromatin subfamily A member 5;Sucrose nonfermenting protein 2 homolog	SMARCA5;SNF2H;WCRF135	SWI/SNF-related matrix-associated actin-dependent regulator of chromatin subfamily A member 5	O60264	SMCA5_HUMAN	1	39	39	27	40	30.4	121.9	1052	0	0.0762438	0.322709	0	0.0615538	0.301006	6	0.974124	1.16122	0.365408	0.718237	FALSE	10.7083	0.00860843	0.0460179	TRUE	+				3931	;O60264(IPI00297211)	GO:0005730;GO:0005677;GO:0043596;GO:0031213;GO:0000793;GO:0005654;GO:0005634;GO:0016589	1;1;1;1;1;1;1;1	GO:0042393;GO:0003677;GO:0005524;GO:0004386;GO:0016817;GO:0005515;GO:0016787;GO:0000166;GO:0003682;GO:0016887;GO:0003676;GO:0031491;GO:0016818	1;1;1;1;1;1;1;1;1;1;1;1;1	GO:0006334;GO:0009790;GO:0006333;GO:0045893;GO:0043044;GO:0016568;GO:0034080;GO:0006338;GO:0006352;GO:0006302;GO:0006357;GO:0000183;GO:0016584;GO:0006200	1;1;1;1;1;1;1;1;1;1;1;1;1;1	nucleoplasm;condensed chromosome;NURF complex;nucleus;RSF complex;chromatin silencing complex;nuclear replication fork;nucleolus	1;1;1;1;1;1;1;1	hydrolase activity, acting on acid anhydrides, in phosphorus-containing anhydrides;nucleosome binding;histone binding;DNA binding;ATP binding;ATPase activity;hydrolase activity;hydrolase activity, acting on acid anhydrides;helicase activity;nucleotide binding;chromatin binding;protein binding;nucleic acid binding	1;1;1;1;1;1;1;1;1;1;1;1;1	CENP-A containing nucleosome assembly at centromere;positive regulation of transcription, DNA-dependent;chromatin modification;double-strand break repair;nucleosome positioning;chromatin assembly or disassembly;DNA-dependent transcription, initiation;nucleosome assembly;ATP-dependent chromatin remodeling;embryo development;ATP catabolic process;chromatin remodeling;regulation of transcription fro…	1;1;1;1;1;1;1;1;1;1;1;1;1;1	O60264
3949	IPI:IPI00297779.7	T-complex protein 1 subunit beta;CCT-beta	CCT2;99D8.1;CCTB	T-complex protein 1 subunit beta	P78371	TCPB_HUMAN	1	43	43	43	80.4	80.4	57.488	535	0	0.0563745	0.222676	0	0.0453682	0.22973	6	0.969908	3.56278	0.0705463	0.433732	FALSE	17.4792	0.0032571	0.0347039	TRUE	+				3949	;P78371(IPI00297779)	GO:0005874;GO:0005737;GO:0005832;GO:0005730;GO:0005829;GO:0002199;GO:0005634	1;1;1;1;1;1;1	GO:0005524;GO:0005515;GO:0000166;GO:0051082	1;1;1;1	GO:0006457;GO:0007339;GO:0044267;GO:0051084;GO:0051131	1;1;1;1;1	nucleus;zona pellucida receptor complex;chaperonin-containing T-complex;cytoplasm;cytosol;nucleolus;microtubule	1;1;1;1;1;1;1	ATP binding;unfolded protein binding;nucleotide binding;protein binding	1;1;1;1	chaperone-mediated protein complex assembly;protein folding;binding of sperm to zona pellucida;cellular protein metabolic process;'de novo' posttranslational protein folding	1;1;1;1;1	P78371
3963	IPI:IPI00298547.3	Protein DJ-1;Oncogene DJ1;Parkinson disease protein 7	PARK7	Protein DJ-1	Q99497	PARK7_HUMAN	1	15	15	15	85.2	85.2	19.891	189	0	0.0344076	0.204513	0	0.0386867	0.200962	6	0.987581	5.76074	0.028836	0.357252	FALSE	26.0338	0.0014722	0.031645	TRUE	+				3963	;Q99497(IPI00298547)	GO:0005737;GO:0005739;GO:0005634	1;1;1	GO:0003723;GO:0008233;GO:0005515;GO:0016787;GO:0003729;GO:0042803;GO:0051920;GO:0004601	1;1;1;1;1;1;1;1	GO:0051583;GO:0043523;GO:0032091;GO:0006914;GO:0007005;GO:2000277;GO:0034599;GO:0060765;GO:0006954;GO:0051899;GO:0001963;GO:0060548;GO:0008344;GO:0070301;GO:0042743;GO:0043524;GO:0006508;GO:0006950;GO:2001237;GO:0007338;GO:0008219;GO:0042542;GO:0060081;GO:0050727;GO:0050821	1;1;1;1;1;1;1;1;1;1;1;1;1;1;1;1;1;1;1;1;1;1;1;1;1	mitochondrion;nucleus;cytoplasm	1;1;1	peptidase activity;mRNA binding;RNA binding;peroxiredoxin activity;protein homodimerization activity;hydrolase activity;peroxidase activity;protein binding	1;1;1;1;1;1;1;1	inflammatory response;cell death;protein stabilization;negative regulation of protein binding;membrane depolarization;autophagy;single fertilization;response to stress;regulation of androgen receptor signaling pathway;cellular response to hydrogen peroxide;regulation of inflammatory response;proteolysis;membrane hyperpolarization;synaptic transmission, dopaminergic;mitochondrion organization;dopa…	1;1;1;1;1;1;1;1;1;1;1;1;1;1;1;1;1;1;1;1;1;1;1;1;1	Q99497
3979	IPI:IPI00298940.3	Serine/threonine-protein kinase 6;Aurora kinase A;Serine/threonine kinase 15;Aurora/IPL1-related kinase 1;Breast tumor-amplified kinase	AURKA;AIK;ARK1;AURA;BTAK;STK15;STK6	Serine/threonine-protein kinase 6	O14965	STK6_HUMAN	3	10	10	9	32.3	30.3	45.809	403	0	-0.320842	1.14336	0	-0.457256	1.13715	6	0.978036	-3.1113	0.0896322	0.479314	FALSE	26.1853	0.00145524	0.031533	TRUE	+				3979	;O14965(IPI00298940)	GO:0000922;GO:0005874;GO:0005737;GO:0030496;GO:0005829;GO:0005819;GO:0005876;GO:0005856;GO:0005634;GO:0005815;GO:0005813;GO:0048471;GO:0031616	1;1;1;1;1;1;1;1;1;1;1;1;1	GO:0005524;GO:0031625;GO:0019901;GO:0005515;GO:0004672;GO:0000166;GO:0004712;GO:0016301;GO:0004674;GO:0016740;GO:0016772	1;1;1;1;1;1;1;1;1;1;1	GO:0007067;GO:0046777;GO:0000278;GO:0045840;GO:0030030;GO:0051301;GO:0031145;GO:0046605;GO:0016310;GO:0007051;GO:0006468;GO:0048015;GO:0031647;GO:0007049	1;1;1;1;1;1;1;1;1;1;1;1;1;1	microtubule organizing center;midbody;nucleus;spindle pole centrosome;spindle;spindle microtubule;centrosome;perinuclear region of cytoplasm;cytoplasm;cytosol;cytoskeleton;microtubule;spindle pole	1;1;1;1;1;1;1;1;1;1;1;1;1	protein kinase binding;transferase activity;transferase activity, transferring phosphorus-containing groups;ATP binding;protein serine/threonine/tyrosine kinase activity;ubiquitin protein ligase binding;protein serine/threonine kinase activity;protein kinase activity;nucleotide binding;protein binding;kinase activity	1;1;1;1;1;1;1;1;1;1;1	mitotic cell cycle;positive regulation of mitosis;anaphase-promoting complex-dependent proteasomal ubiquitin-dependent protein catabolic process;cell division;protein autophosphorylation;phosphatidylinositol-mediated signaling;protein phosphorylation;mitosis;regulation of protein stability;cell cycle;phosphorylation;regulation of centrosome cycle;spindle organization;cell projection organization	1;1;1;1;1;1;1;1;1;1;1;1;1;1	O14965
3982	IPI:IPI00298961.3	Exportin-1;Chromosome region maintenance 1 protein homolog	XPO1;CRM1	Exportin-1	O14980	XPO1_HUMAN	1	40	40	40	43.8	43.8	123.38	1071	0	0.0205064	0.135329	0	0.0190657	0.13085	6	0.99007	3.36155	0.0782492	0.446065	FALSE	14.026	0.00504472	0.0379225	TRUE	+				3982	;O14980(IPI00298961)	GO:0005635;GO:0005737;GO:0005730;GO:0005829;GO:0015030;GO:0005634;GO:0005654;GO:0005642;GO:0030529;GO:0000776	1;1;1;1;1;1;1;1;1;1	GO:0003723;GO:0008565;GO:0005515;GO:0008536;GO:0019904;GO:0005215	1;1;1;1;1;1	GO:0015031;GO:0010824;GO:0075733;GO:0000278;GO:0000122;GO:0006611;GO:0016070;GO:0006810;GO:0046825;GO:0016071;GO:0051028;GO:0019058;GO:0042493;GO:0016032;GO:0006886;GO:0042176;GO:0007179;GO:0030512;GO:0010467;GO:0034504;GO:0019048	1;1;1;1;1;1;1;1;1;1;1;1;1;1;1;1;1;1;1;1;1	annulate lamellae;nucleoplasm;nucleus;kinetochore;nuclear envelope;ribonucleoprotein complex;Cajal body;cytoplasm;cytosol;nucleolus	1;1;1;1;1;1;1;1;1;1	transporter activity;RNA binding;Ran GTPase binding;protein transporter activity;protein binding;protein domain specific binding	1;1;1;1;1;1	mitotic cell cycle;negative regulation of transforming growth factor beta receptor signaling pathway;transforming growth factor beta receptor signaling pathway;intracellular protein transport;viral infectious cycle;protein export from nucleus;viral process;regulation of protein catabolic process;transport;intracellular transport of viral material;response to drug;RNA metabolic process;negative re…	1;1;1;1;1;1;1;1;1;1;1;1;1;1;1;1;1;1;1;1;1	O14980
3984	IPI:IPI00298994.6	Talin-1	TLN1;KIAA1027;TLN	Talin-1	Q9Y490	TLN1_HUMAN	1	89	89	82	49.2	45.6	269.76	2541	0	0.0577536	0.273928	0	0.0638249	0.2757	6	0.9798	7.0296	0.0196424	0.343164	FALSE	32.2275	0.000961437	0.0291412	TRUE	+				3984	;Q9Y490(IPI00298994)	GO:0016020;GO:0042995;GO:0030054;GO:0032587;GO:0005737;GO:0005911;GO:0005829;GO:0015629;GO:0005576;GO:0005886;GO:0043231;GO:0005856;GO:0070062;GO:0005925;GO:0005813;GO:0001726;GO:0009986	1;1;1;1;1;1;1;1;1;1;1;1;1;1;1;1;1	GO:0030274;GO:0005515;GO:0005158;GO:0005200;GO:0017166;GO:0003779;GO:0005198	1;1;1;1;1;1;1	GO:0007596;GO:0030968;GO:0007155;GO:0007044;GO:0030866;GO:0030168;GO:0007016;GO:0044267;GO:0002576;GO:0007411;GO:0006936;GO:0007043;GO:0006987;GO:0006928	1;1;1;1;1;1;1;1;1;1;1;1;1;1	ruffle membrane;cell junction;focal adhesion;plasma membrane;cell projection;intracellular membrane-bounded organelle;centrosome;actin cytoskeleton;cytoplasm;cell-cell junction;cytosol;extracellular vesicular exosome;extracellular region;cytoskeleton;cell surface;membrane;ruffle	1;1;1;1;1;1;1;1;1;1;1;1;1;1;1;1;1	vinculin binding;structural constituent of cytoskeleton;insulin receptor binding;LIM domain binding;actin binding;protein binding;structural molecule activity	1;1;1;1;1;1;1	platelet degranulation;cytoskeletal anchoring at plasma membrane;cell-cell junction assembly;platelet activation;activation of signaling protein activity involved in unfolded protein response;axon guidance;cellular protein metabolic process;cell adhesion;cell-substrate junction assembly;muscle contraction;blood coagulation;cellular component movement;cortical actin cytoskeleton organization;endop…	1;1;1;1;1;1;1;1;1;1;1;1;1;1	Q9Y490
3988	IPI:IPI00299063.2	Stromal interaction molecule 1	STIM1;GOK	Stromal interaction molecule 1	Q13586	STIM1_HUMAN	1	13	13	13	25.1	25.1	77.422	685	0	0.0751776	0.389195	0	0.108262	0.401999	6	0.983285	2.34507	0.143665	0.554589	FALSE	12.482	0.00635737	0.0417612	TRUE	+				3988	;Q13586(IPI00299063)	GO:0016020;GO:0005783;GO:0005874;GO:0005737;GO:0005887;GO:0032541;GO:0016021;GO:0005886;GO:0005856;GO:0043234;GO:0030176;GO:0005789	1;1;1;1;1;1;1;1;1;1;1;1	GO:0005515;GO:0051010;GO:0042802;GO:0046872;GO:0005509	1;1;1;1;1	GO:0007596;GO:0005513;GO:0006810;GO:0032237;GO:0006812;GO:0006816;GO:0051924;GO:0006811	1;1;1;1;1;1;1;1	integral to endoplasmic reticulum membrane;integral to membrane;plasma membrane;endoplasmic reticulum membrane;integral to plasma membrane;endoplasmic reticulum;protein complex;cytoplasm;cytoskeleton;microtubule;cortical endoplasmic reticulum;membrane	1;1;1;1;1;1;1;1;1;1;1;1	microtubule plus-end binding;identical protein binding;protein binding;calcium ion binding;metal ion binding	1;1;1;1;1	detection of calcium ion;transport;ion transport;cation transport;activation of store-operated calcium channel activity;regulation of calcium ion transport;calcium ion transport;blood coagulation	1;1;1;1;1;1;1;1	Q13586
3989	IPI:IPI00299066.5	Leupaxin	LPXN;LDLP	Leupaxin	O60711	LPXN_HUMAN	1	11	11	11	33.4	33.4	43.332	386	0	0.0430674	0.392408	0	0.0588189	0.378035	6	0.994981	3.11082	0.0896559	0.479314	FALSE	14.3267	0.00483666	0.0376153	TRUE	+				3989	;O60711(IPI00299066)	GO:0016020;GO:0042995;GO:0030054;GO:0005737;GO:0002102;GO:0005886;GO:0005634;GO:0005925;GO:0048471	1;1;1;1;1;1;1;1;1	GO:0005515;GO:0008270;GO:0003712;GO:0046872	1;1;1;1	GO:0007165;GO:0007155;GO:0006351;GO:0007162;GO:0050859;GO:0006461;GO:0006355;GO:0033628	1;1;1;1;1;1;1;1	podosome;cell junction;focal adhesion;nucleus;plasma membrane;cell projection;perinuclear region of cytoplasm;cytoplasm;membrane	1;1;1;1;1;1;1;1;1	transcription cofactor activity;protein binding;zinc ion binding;metal ion binding	1;1;1;1	transcription, DNA-dependent;regulation of transcription, DNA-dependent;negative regulation of cell adhesion;signal transduction;cell adhesion;negative regulation of B cell receptor signaling pathway;regulation of cell adhesion mediated by integrin;protein complex assembly	1;1;1;1;1;1;1;1	O60711
3991	IPI:IPI00299086.3	Syntenin-1;Syndecan-binding protein 1;Melanoma differentiation-associated protein 9;Scaffold protein Pbp1;Pro-TGF-alpha cytoplasmic domain-interacting protein 18	SDCBP;MDA9;SYCL	Isoform 1 of Syntenin-1;Syntenin isoform 3;Isoform 3 of Syntenin-1	O00560-1;O00560;O00560-2;O00560-3	SDCB1_HUMAN	3	5	5	5	27.5	27.5	32.444	298	0	0.00293275	0.507552	0	-0.0193001	0.495405	6	0.999987	-0.776122	0.518888	0.797085	FALSE	30.4401	0.00107747	0.0294218	TRUE	+				3991	;O00560(IPI00299086)	GO:0016020;GO:0005783;GO:0030054;GO:0042470;GO:0005737;GO:0005895;GO:0005829;GO:0005886;GO:0070062;GO:0005856;GO:0005634;GO:0005925;GO:0005912;GO:0005789	1;1;1;1;1;1;1;1;1;1;1;1;1;1	GO:0005137;GO:0042043;GO:0047485;GO:0046982;GO:0019838;GO:0005109;GO:0046875;GO:0050839;GO:0045545;GO:0042803;GO:0008093;GO:0008022;GO:0001948	1;1;1;1;1;1;1;1;1;1;1;1;1	GO:0046330;GO:0006612;GO:0030036;GO:0042327;GO:0006930;GO:0007265;GO:0007411;GO:0035556;GO:0007268	1;1;1;1;1;1;1;1;1	adherens junction;cell junction;focal adhesion;nucleus;plasma membrane;endoplasmic reticulum membrane;melanosome;endoplasmic reticulum;cytoplasm;cytosol;extracellular vesicular exosome;interleukin-5 receptor complex;cytoskeleton;membrane	1;1;1;1;1;1;1;1;1;1;1;1;1;1	cytoskeletal adaptor activity;glycoprotein binding;cell adhesion molecule binding;ephrin receptor binding;syndecan binding;protein C-terminus binding;growth factor binding;protein homodimerization activity;protein N-terminus binding;protein heterodimerization activity;frizzled binding;neurexin family protein binding;interleukin-5 receptor binding	1;1;1;1;1;1;1;1;1;1;1;1;1	substrate-dependent cell migration, cell extension;Ras protein signal transduction;intracellular signal transduction;positive regulation of phosphorylation;synaptic transmission;actin cytoskeleton organization;positive regulation of JNK cascade;axon guidance;protein targeting to membrane	1;1;1;1;1;1;1;1;1	O00560
4042	IPI:IPI00301021.3	Translocon-associated protein subunit alpha;Signal sequence receptor subunit alpha	SSR1;TRAPA;PSEC0262	Isoform 1 of Translocon-associated protein subunit alpha;Isoform 2 of Translocon-associated protein subunit alpha	P43307-1;P43307;P43307-2	SSRA_HUMAN	2	3	3	3	11.9	11.9	32.235	286	0	0.0122433	0.249682	0	0.0295685	0.242299	6	0.999054	0.706965	0.552858	0.819335	FALSE	13.7705	0.00523216	0.0383962	TRUE	+				4042	;P43307(IPI00301021)	GO:0016020;GO:0005783;GO:0016021;GO:0005789	1;1;1;1			GO:0030968;GO:0006412;GO:0044267;GO:0006613;GO:0006614;GO:0006987;GO:0010467;GO:0008284	1;1;1;1;1;1;1;1	integral to membrane;endoplasmic reticulum membrane;endoplasmic reticulum;membrane	1;1;1;1			activation of signaling protein activity involved in unfolded protein response;cotranslational protein targeting to membrane;cellular protein metabolic process;gene expression;translation;positive regulation of cell proliferation;endoplasmic reticulum unfolded protein response;SRP-dependent cotranslational protein targeting to membrane	1;1;1;1;1;1;1;1	P43307
4089	IPI:IPI00302673.3	ATP synthase mitochondrial F1 complex assembly factor 1;ATP11 homolog	ATPAF1;ATP11	ATP synthase mitochondrial F1 complex assembly factor 1	Q5TC12	ATPF1_HUMAN	1	6	6	6	25.6	25.6	36.436	328	0	0.0916753	0.473732	0	0.0793533	0.499204	6	0.983219	3.31135	0.0803592	0.450315	FALSE	12.3106	0.00653386	0.0420854	TRUE	+				4089	;Q5TC12(IPI00302673)	GO:0005739	1	GO:0005515	1	GO:0006461	1	mitochondrion	1	protein binding	1	protein complex assembly	1	Q5TC12
4096	IPI:IPI00302927.6	T-complex protein 1 subunit delta;CCT-delta;Stimulator of TAR RNA-binding	CCT4;CCTD;SRB	T-complex protein 1 subunit delta	P50991	TCPD_HUMAN	1	32	32	32	67.9	67.9	57.924	539	0	0.0647666	0.328852	0	0.0732147	0.309143	6	0.98257	5.31343	0.0336429	0.363788	FALSE	14.8994	0.00447447	0.0373904	TRUE	+				4096	;P50991(IPI00302927)	GO:0005874;GO:0042470;GO:0005737;GO:0005832;GO:0005730;GO:0005829;GO:0002199;GO:0005856;GO:0005634;GO:0005815;GO:0005813	1;1;1;1;1;1;1;1;1;1;1	GO:0005524;GO:0000166;GO:0051082	1;1;1	GO:0006457;GO:0007339;GO:0044267;GO:0051084	1;1;1;1	microtubule organizing center;nucleus;melanosome;zona pellucida receptor complex;centrosome;chaperonin-containing T-complex;cytoplasm;cytosol;nucleolus;cytoskeleton;microtubule	1;1;1;1;1;1;1;1;1;1;1	ATP binding;unfolded protein binding;nucleotide binding	1;1;1	protein folding;binding of sperm to zona pellucida;cellular protein metabolic process;'de novo' posttranslational protein folding	1;1;1;1	P50991
4120	IPI:IPI00303832.6	RNA polymerase-associated protein RTF1 homolog	RTF1;KIAA0252	Paf1/RNA polymerase II complex component	Q92541	RTF1_HUMAN	1	9	9	9	14.6	14.6	80.313	710	0	0.0565933	0.228019	0	0.0818023	0.224156	6	0.971185	1.69676	0.231834	0.621571	FALSE	14.8755	0.00448874	0.0373904	TRUE	+				4120	;Q92541(IPI00303832)	GO:0005730;GO:0005634;GO:0005654;GO:0016593	1;1;1;1	GO:0003677;GO:0003697;GO:0005515	1;1;1	GO:0045944;GO:0016055;GO:0000122;GO:0051571;GO:0006351;GO:0080182;GO:0006352;GO:0016570;GO:0032968;GO:0001711;GO:0019827;GO:0006355	1;1;1;1;1;1;1;1;1;1;1;1	nucleoplasm;nucleus;Cdc73/Paf1 complex;nucleolus	1;1;1;1	DNA binding;single-stranded DNA binding;protein binding	1;1;1	Wnt receptor signaling pathway;histone H3-K4 trimethylation;endodermal cell fate commitment;transcription, DNA-dependent;histone modification;positive regulation of transcription from RNA polymerase II promoter;regulation of transcription, DNA-dependent;negative regulation of transcription from RNA polymerase II promoter;stem cell maintenance;positive regulation of histone H3-K4 methylation;DNA-d…	1;1;1;1;1;1;1;1;1;1;1;1	Q92541
4133	IPI:IPI00304267.3	Nucleoredoxin	NXN;NRX	Isoform 1 of Nucleoredoxin	Q6DKJ4-1;Q6DKJ4	NXN_HUMAN	1	6	6	3	18.9	11.5	48.392	435	0	0.0548522	0.541022	0	0.0594209	0.507845	6	0.99575	8.61749	0.0131999	0.316271	FALSE	13.9782	0.00507901	0.0379225	TRUE	+				4133	;Q6DKJ4(IPI00304267)	GO:0005737;GO:0005829;GO:0005634	1;1;1	GO:0004791;GO:0047134;GO:0016491	1;1;1	GO:0016055;GO:0030178;GO:0055114;GO:0030154;GO:0007275;GO:0031397;GO:0072358	1;1;1;1;1;1;1	nucleus;cytoplasm;cytosol	1;1;1	protein-disulfide reductase activity;oxidoreductase activity;thioredoxin-disulfide reductase activity	1;1;1	cell differentiation;oxidation-reduction process;Wnt receptor signaling pathway;negative regulation of Wnt receptor signaling pathway;cardiovascular system development;negative regulation of protein ubiquitination;multicellular organismal development	1;1;1;1;1;1;1	Q6DKJ4
4158	IPI:IPI00305010.3	Calcineurin-like phosphoesterase domain-containing protein 1;Complete S-transactivated protein 1	CPPED1;CSTP1	Isoform 1 of Calcineurin-like phosphoesterase domain-containing protein 1;Isoform 2 of Calcineurin-like phosphoesterase domain-containing protein 1	Q9BRF8-1;Q9BRF8;Q9BRF8-2	CPPED_HUMAN	2	4	4	4	18.5	18.5	35.576	314	0	0.00312879	0.186007	0	0.0389768	0.201694	6	0.999892	0.538533	0.644129	0.867132	FALSE	11.6382	0.0073022	0.043741	TRUE	+				4158	;Q9BRF8(IPI00305010)			GO:0016787;GO:0046872	1;1					hydrolase activity;metal ion binding	1;1			Q9BRF8
4164	IPI:IPI00305212.5	COMM domain-containing protein 9	COMMD9;HSPC166	COMM domain-containing protein 9	Q9P000	COMD9_HUMAN	1	8	8	8	59.1	59.1	21.819	198	0	-0.0139507	0.432906	0	-0.00719287	0.413928	6	0.999623	-0.119972	0.91547	0.971805	FALSE	16.8345	0.00351001	0.0347039	TRUE	+				4164	;Q9P000(IPI00305212)													Q9P000
4167	IPI:IPI00305289.2	Kinesin-like protein KIF11;Kinesin-related motor protein Eg5;Kinesin-like spindle protein HKSP;Thyroid receptor-interacting protein 5;Kinesin-like protein 1	KIF11;EG5;KNSL1;TRIP5	Kinesin-like protein KIF11	P52732	KIF11_HUMAN	1	24	24	24	28.1	28.1	119.16	1056	0	0.110802	0.571798	0	0.0774982	0.550613	6	0.98317	0.820528	0.498152	0.787783	FALSE	13.1878	0.00570069	0.0396302	TRUE	+				4167	;P52732(IPI00305289)	GO:0000922;GO:0005874;GO:0005737;GO:0005829;GO:0005819;GO:0005871;GO:0005876;GO:0005856	1;1;1;1;1;1;1;1	GO:0005524;GO:0019901;GO:0000166;GO:0008017;GO:0003777	1;1;1;1;1	GO:0007596;GO:0007067;GO:0090307;GO:0019886;GO:0051301;GO:0007051;GO:0007052;GO:0007100;GO:0007018;GO:0007049	1;1;1;1;1;1;1;1;1;1	kinesin complex;spindle;spindle microtubule;cytoplasm;cytosol;cytoskeleton;microtubule;spindle pole	1;1;1;1;1;1;1;1	microtubule binding;microtubule motor activity;protein kinase binding;ATP binding;nucleotide binding	1;1;1;1;1	cell division;mitotic centrosome separation;mitosis;microtubule-based movement;antigen processing and presentation of exogenous peptide antigen via MHC class II;mitotic spindle organization;cell cycle;blood coagulation;spindle organization;spindle assembly involved in mitosis	1;1;1;1;1;1;1;1;1;1	P52732
4225	IPI:IPI00306749.8	Kanadaptin;Kidney anion exchanger adapter protein;Solute carrier family 4 anion exchanger member 1 adapter protein;Human lung cancer oncogene 3 protein	SLC4A1AP;HLC3	Kanadaptin	Q9BWU0	NADAP_HUMAN	1	11	11	11	20.1	20.1	88.813	796	0	0.0340152	0.348249	0	0.0619268	0.330275	6	0.996069	0.866325	0.477636	0.778156	FALSE	13.9653	0.00508831	0.0379225	TRUE	+				4225	;Q9BWU0(IPI00306749)	GO:0005737;GO:0005634	1;1	GO:0005515	1			nucleus;cytoplasm	1;1	protein binding	1			Q9BWU0
4250	IPI:IPI00328118.4	Sperm-associated antigen 5;Astrin;Mitotic spindle-associated protein p126;Deepest	SPAG5	Sperm-associated antigen 5	Q96R06	SPAG5_HUMAN	1	10	10	10	9.7	9.7	134.42	1193	0	0.107886	0.411311	0	0.0864466	0.435237	6	0.967481	1.02998	0.411281	0.742786	FALSE	15.8971	0.00393363	0.0356971	TRUE	+				4250	;Q96R06(IPI00328118)	GO:0000922;GO:0005874;GO:0035371;GO:0005737;GO:0005730;GO:0005819;GO:0000777;GO:0005876;GO:0005856;GO:0072686;GO:0005634;GO:0005694;GO:0000775;GO:0000776	1;1;1;1;1;1;1;1;1;1;1;1;1;1	GO:0005515	1	GO:0007067;GO:0007059;GO:0051301;GO:0000090;GO:0007051;GO:0051988;GO:0048015;GO:0000070;GO:0007049	1;1;1;1;1;1;1;1;1	microtubule plus end;chromosome, centromeric region;chromosome;nucleus;kinetochore;spindle;spindle microtubule;condensed chromosome kinetochore;mitotic spindle;cytoplasm;nucleolus;cytoskeleton;microtubule;spindle pole	1;1;1;1;1;1;1;1;1;1;1;1;1;1	protein binding	1	regulation of attachment of spindle microtubules to kinetochore;cell division;phosphatidylinositol-mediated signaling;mitosis;cell cycle;mitotic sister chromatid segregation;chromosome segregation;spindle organization;mitotic anaphase	1;1;1;1;1;1;1;1;1	Q96R06
4414	IPI:IPI00337660.1	Serine/threonine-protein kinase tousled-like 2;Tousled-like kinase 2;PKU-alpha	TLK2	Isoform 3 of Serine/threonine-protein kinase tousled-like 2;Isoform 1 of Serine/threonine-protein kinase tousled-like 2;Isoform 2 of Serine/threonine-protein kinase tousled-like 2	Q86UE8-3;Q86UE8;Q86UE8-1;Q86UE8-2	TLK2_HUMAN	3	14	14	11	23.5	18.7	82.347	718	0	0.0815438	0.316774	0	0.109613	0.318655	6	0.968791	1.14836	0.369635	0.720528	FALSE	19.0802	0.00273558	0.0347039	TRUE	+				4414	;Q86UE8(IPI00337660)	GO:0005737;GO:0005856;GO:0005634;GO:0005882;GO:0048471	1;1;1;1;1	GO:0005524;GO:0005515;GO:0000166;GO:0004672;GO:0016301;GO:0004674;GO:0016740;GO:0016772	1;1;1;1;1;1;1;1	GO:0018105;GO:0007059;GO:0016568;GO:0071480;GO:0001672;GO:0010507;GO:0032435;GO:0016310;GO:0006468;GO:0035556;GO:0006974;GO:0007049	1;1;1;1;1;1;1;1;1;1;1;1	nucleus;perinuclear region of cytoplasm;cytoplasm;intermediate filament;cytoskeleton	1;1;1;1;1	transferase activity;transferase activity, transferring phosphorus-containing groups;ATP binding;protein serine/threonine kinase activity;protein kinase activity;nucleotide binding;protein binding;kinase activity	1;1;1;1;1;1;1;1	peptidyl-serine phosphorylation;negative regulation of proteasomal ubiquitin-dependent protein catabolic process;negative regulation of autophagy;intracellular signal transduction;regulation of chromatin assembly or disassembly;cellular response to gamma radiation;chromatin modification;protein phosphorylation;response to DNA damage stimulus;cell cycle;chromosome segregation;phosphorylation	1;1;1;1;1;1;1;1;1;1;1;1	Q86UE8
4472	IPI:IPI00377261.1	Far upstream element-binding protein 3	FUBP3;FBP3	Isoform 1 of Far upstream element-binding protein 3	Q96I24-1;Q96I24	FUBP3_HUMAN	2	21	20	20	47.6	46	61.64	572	0	0.0270417	0.231735	0	0.0342765	0.240157	6	0.99429	4.16262	0.0531527	0.407891	FALSE	16.9584	0.00345918	0.0347039	TRUE	+				4472	;Q96I24(IPI00377261)	GO:0005737;GO:0005634	1;1	GO:0003723;GO:0003677	1;1	GO:0045893;GO:0006351;GO:0010628;GO:0006355	1;1;1;1	nucleus;cytoplasm	1;1	DNA binding;RNA binding	1;1	positive regulation of transcription, DNA-dependent;transcription, DNA-dependent;regulation of transcription, DNA-dependent;positive regulation of gene expression	1;1;1;1	Q96I24
4474	IPI:IPI00382470.3;IPI:IPI00784295.2	Heat shock protein HSP 90-alpha;HSP 86;Renal carcinoma antigen NY-REN-38	HSP90AA1;HSP90A;HSPC1;HSPCA	Isoform 2 of Heat shock protein HSP 90-alpha;Isoform 1 of Heat shock protein HSP 90-alpha	P07900-2;P07900;P07900-1	HS90A_HUMAN	5	74	74	51	54	43.4	98.16	854	0	0.223722	1.3296	0	0.215997	1.29503	6	0.987578	6.05567	0.0262024	0.357252	FALSE	36.8216	0.000736739	0.0262713	TRUE	+				4474	;P07900(IPI00382470;IPI00784295)	GO:0042470;GO:0005737;GO:0005829;GO:0005576;GO:0005886;GO:0005622;GO:0071682	1;1;1;1;1;1;1	GO:0030235;GO:0005524;GO:0005515;GO:0000166;GO:0016887;GO:0042802;GO:0042803;GO:0030911;GO:0051082	1;1;1;1;1;1;1;1;1	GO:0006839;GO:0006457;GO:0007165;GO:0045429;GO:0000278;GO:0044281;GO:0000086;GO:0050999;GO:0042026;GO:0046209;GO:0045087;GO:0007411;GO:0045040;GO:0006986;GO:0006950;GO:0051131;GO:0038096;GO:0006200	1;1;1;1;1;1;1;1;1;1;1;1;1;1;1;1;1;1	plasma membrane;melanosome;intracellular;cytoplasm;cytosol;extracellular region;endocytic vesicle lumen	1;1;1;1;1;1;1	ATP binding;nitric-oxide synthase regulator activity;ATPase activity;protein homodimerization activity;identical protein binding;unfolded protein binding;nucleotide binding;protein binding;TPR domain binding	1;1;1;1;1;1;1;1;1	mitotic cell cycle;response to unfolded protein;mitochondrial transport;chaperone-mediated protein complex assembly;protein refolding;protein folding;small molecule metabolic process;protein import into mitochondrial outer membrane;axon guidance;response to stress;innate immune response;G2/M transition of mitotic cell cycle;signal transduction;positive regulation of nitric oxide biosynthetic proc…	1;1;1;1;1;1;1;1;1;1;1;1;1;1;1;1;1;1	P07900
4501	IPI:IPI00384357.2	FYVE, RhoGEF and PH domain-containing protein 3;Zinc finger FYVE domain-containing protein 5	FGD3;ZFYVE5	Isoform 1 of FYVE, RhoGEF and PH domain-containing protein 3;Isoform 2 of FYVE, RhoGEF and PH domain-containing protein 3	Q5JSP0-1;Q5JSP0;Q5JSP0-2	FGD3_HUMAN	4	10	10	10	16.4	16.4	79.4	725	0	0.176387	0.728513	0	0.203085	0.735191	6	0.972704	3.78004	0.0634021	0.424882	FALSE	45.1803	0.000489533	0.0235882	TRUE	+				4501	;Q5JSP0(IPI00384357)	GO:0005737;GO:0005829;GO:0005856;GO:0030027;GO:0001726;GO:0005794	1;1;1;1;1;1	GO:0031267;GO:0005085;GO:0005543;GO:0046872;GO:0005089	1;1;1;1;1	GO:0046847;GO:0048011;GO:0043088;GO:0030036;GO:0008360;GO:0051056;GO:0007264;GO:0097190;GO:0043065;GO:0007010;GO:0035023	1;1;1;1;1;1;1;1;1;1;1	Golgi apparatus;cytoplasm;cytosol;cytoskeleton;lamellipodium;ruffle	1;1;1;1;1;1	phospholipid binding;guanyl-nucleotide exchange factor activity;Rho guanyl-nucleotide exchange factor activity;small GTPase binding;metal ion binding	1;1;1;1;1	apoptotic signaling pathway;regulation of Cdc42 GTPase activity;neurotrophin TRK receptor signaling pathway;actin cytoskeleton organization;cytoskeleton organization;regulation of small GTPase mediated signal transduction;regulation of Rho protein signal transduction;filopodium assembly;positive regulation of apoptotic process;regulation of cell shape;small GTPase mediated signal transduction	1;1;1;1;1;1;1;1;1;1;1	Q5JSP0
4563	IPI:IPI00395627.3	Calcyclin-binding protein;Siah-interacting protein;S100A6-binding protein	CACYBP;S100A6BP;SIP;PNAS-107	Isoform 1 of Calcyclin-binding protein	Q9HB71-1;Q9HB71	CYBP_HUMAN	2	20	20	20	59.6	59.6	26.21	228	0	0.0942312	0.784652	0	0.0920429	0.726187	6	0.993934	3.42403	0.0757329	0.442294	FALSE	12.2544	0.00659331	0.0422682	TRUE	+				4563	;Q9HB71(IPI00395627)	GO:0030877;GO:0005737;GO:0005641;GO:0005634;GO:0043005;GO:0044297	1;1;1;1;1;1	GO:0005515;GO:0042803	1;1	GO:0007507;GO:0007568;GO:0060548;GO:0055007;GO:0045740;GO:0071277;GO:0060416	1;1;1;1;1;1;1	nuclear envelope lumen;cell body;neuron projection;nucleus;cytoplasm;beta-catenin destruction complex	1;1;1;1;1;1	protein homodimerization activity;protein binding	1;1	cardiac muscle cell differentiation;positive regulation of DNA replication;aging;cellular response to calcium ion;heart development;response to growth hormone stimulus;negative regulation of cell death	1;1;1;1;1;1;1	Q9HB71
4567	IPI:IPI00872398.2;IPI:IPI00395694.1;IPI:IPI00455127.2	Transportin-3;Transportin-SR;Importin-12	TNPO3;IPO12	Putative uncharacterized protein TNPO3;Isoform 2 of Transportin-3;Isoform 3 of Transportin-3	Q9Y5L0-1;Q9Y5L0;Q9Y5L0-2;Q9Y5L0-3	TNPO3_HUMAN	3	21	21	21	29.9	29.9	108.92	967	0	0.0153697	0.32081	0	0.0240675	0.304913	6	0.999098	0.753138	0.529951	0.802628	FALSE	13.96	0.0050922	0.0379225	TRUE	+				4567	;Q9Y5L0(IPI00455127;IPI00395694)	GO:0005737;GO:0005730;GO:0043231;GO:0005634	1;1;1;1	GO:0005515;GO:0004872	1;1	GO:0015031;GO:0006810;GO:0035048	1;1;1	nucleus;intracellular membrane-bounded organelle;cytoplasm;nucleolus	1;1;1;1	receptor activity;protein binding	1;1	transport;splicing factor protein import into nucleus;protein transport	1;1;1	Q9Y5L0
4654	IPI:IPI00410091.3	Uncharacterized protein C11orf73	C11orf73;HSPC138;HSPC179;HSPC248	Uncharacterized protein C11orf73	Q53FT3	CK073_HUMAN	1	6	6	6	27.9	27.9	21.627	197	0	0.154125	1.05875	0	0.151776	1.0534	6	0.990883	10.5479	0.00886869	0.309054	FALSE	44.8576	0.000496597	0.0235882	TRUE	+				4654	;Q53FT3(IPI00410091)	GO:0005737;GO:0005829;GO:0005634;GO:0005622	1;1;1;1	GO:0008565;GO:0030544	1;1	GO:0015031;GO:0006606;GO:0030324;GO:0006810;GO:0007030;GO:0034605	1;1;1;1;1;1	nucleus;intracellular;cytoplasm;cytosol	1;1;1;1	Hsp70 protein binding;protein transporter activity	1;1	transport;lung development;protein transport;Golgi organization;protein import into nucleus;cellular response to heat	1;1;1;1;1;1	Q53FT3
4691	IPI:IPI00411680.10	Protein-L-isoaspartate(D-aspartate) O-methyltransferase;Protein-beta-aspartate methyltransferase;Protein L-isoaspartyl/D-aspartyl methyltransferase;L-isoaspartyl protein carboxyl methyltransferase	PCMT1	Isoform 1 of Protein-L-isoaspartate(D-aspartate) O-methyltransferase;Isoform 2 of Protein-L-isoaspartate(D-aspartate) O-methyltransferase	P22061-1;P22061;P22061-2	PIMT_HUMAN	2	14	14	14	64.8	64.8	24.65	227	0	0.0544312	0.227176	0	0.0827972	0.220132	6	0.97332	2.67462	0.115971	0.524563	FALSE	17.5865	0.00321768	0.0347039	TRUE	+				4691	;P22061(IPI00411680)	GO:0005783;GO:0005737	1;1	GO:0008168;GO:0004719;GO:0016740	1;1;1	GO:0032259;GO:0006464;GO:0030091;GO:0006479	1;1;1;1	endoplasmic reticulum;cytoplasm	1;1	protein-L-isoaspartate (D-aspartate) O-methyltransferase activity;transferase activity;methyltransferase activity	1;1;1	protein methylation;protein repair;cellular protein modification process;methylation	1;1;1;1	P22061
4732	IPI:IPI00413641.7	Aldose reductase;Aldehyde reductase	AKR1B1;ALDR1	Aldose reductase	P15121	ALDR_HUMAN	1	12	12	12	44.6	44.6	35.853	316	0	0.0458441	0.264632	0	0.0657159	0.253311	6	0.986777	1.72161	0.227281	0.619231	FALSE	16.9462	0.00346412	0.0347039	TRUE	+				4732	;P15121(IPI00413641)	GO:0005615;GO:0005737;GO:0005730;GO:0005829;GO:0005634	1;1;1;1;1	GO:0004032;GO:0016491;GO:0009055;GO:0043795;GO:0004033	1;1;1;1;1	GO:0055114;GO:0044281;GO:0008202;GO:0005975;GO:0006950;GO:0044597;GO:0044598;GO:0006700	1;1;1;1;1;1;1;1	extracellular space;nucleus;cytoplasm;cytosol;nucleolus	1;1;1;1;1	glyceraldehyde oxidoreductase activity;oxidoreductase activity;aldo-keto reductase (NADP) activity;electron carrier activity;alditol:NADP+ 1-oxidoreductase activity	1;1;1;1;1	oxidation-reduction process;doxorubicin metabolic process;small molecule metabolic process;response to stress;steroid metabolic process;daunorubicin metabolic process;C21-steroid hormone biosynthetic process;carbohydrate metabolic process	1;1;1;1;1;1;1;1	P15121
4742	IPI:IPI00414320.2	Annexin A11;Annexin-11;Annexin XI;Calcyclin-associated annexin 50;56 kDa autoantigen	ANXA11;ANX11	cDNA FLJ55482, highly similar to Annexin A11	P50995	ANX11_HUMAN	3	17	17	17	28.8	28.8	65.596	605	0	0.0607334	0.322477	0	0.081107	0.301018	6	0.984173	2.47673	0.131597	0.536871	FALSE	13.0008	0.0058644	0.0401844	TRUE	+				4742	;P50995(IPI00414320)	GO:0005635;GO:0042470;GO:0005737;GO:0030496;GO:0045335;GO:0005819;GO:0042582;GO:0005856;GO:0005634;GO:0005654;GO:0042581	1;1;1;1;1;1;1;1;1;1;1	GO:0005544;GO:0005515;GO:0048306;GO:0044548;GO:0005509;GO:0008429	1;1;1;1;1;1	GO:0006909;GO:0051301;GO:0051592;GO:0007109;GO:0007049	1;1;1;1;1	nucleoplasm;specific granule;midbody;nucleus;melanosome;spindle;nuclear envelope;phagocytic vesicle;cytoplasm;cytoskeleton;azurophil granule	1;1;1;1;1;1;1;1;1;1;1	phosphatidylethanolamine binding;calcium-dependent protein binding;calcium-dependent phospholipid binding;S100 protein binding;protein binding;calcium ion binding	1;1;1;1;1;1	cytokinesis, completion of separation;cell division;phagocytosis;response to calcium ion;cell cycle	1;1;1;1;1	P50995
4745	IPI:IPI00414442.3	CDK5 regulatory subunit-associated protein 3;CDK5 activator-binding protein C53;Protein HSF-27	CDK5RAP3;IC53;MSTP016;OK/SW-cl.114;PP1553	cDNA FLJ56403, highly similar to CDK5 regulatory subunit-associated protein 3;Isoform 2 of CDK5 regulatory subunit-associated protein 3;Isoform 3 of CDK5 regulatory subunit-associated protein 3	Q96JB5-1;Q96JB5;Q96JB5-2;Q96JB5-3	CK5P3_HUMAN	3	12	12	12	22.6	22.6	59.586	531	0	0.0327255	0.255535	0	0.0481707	0.26292	6	0.993052	1.88936	0.199429	0.600063	FALSE	16.6882	0.0035715	0.0347039	TRUE	+				4745	;Q96JB5(IPI00414442)	GO:0005575	1	GO:0019901;GO:0005515	1;1	GO:0007420;GO:0045944;GO:0045664;GO:0000079	1;1;1;1	cellular_component	1	protein kinase binding;protein binding	1;1	positive regulation of transcription from RNA polymerase II promoter;regulation of neuron differentiation;regulation of cyclin-dependent protein serine/threonine kinase activity;brain development	1;1;1;1	Q96JB5
4752	IPI:IPI00414676.6	Heat shock protein HSP 90-beta;HSP 84;Putative heat shock protein HSP 90-beta-3;Heat shock protein 90-beta c	HSP90AB1;HSP90B;HSPC2;HSPCB;HSP90AB3P;HSP90BC	Heat shock protein HSP 90-beta;Putative heat shock protein HSP 90-beta-3	P08238;Q58FF7	HS90B_HUMAN;H90B3_HUMAN	3	69	46	41	64.9	45.3	83.263	724	0	0.0698333	0.719279	0	0.0688226	0.695843	6	0.996118	2.26471	0.151795	0.555765	FALSE	25.3202	0.00155615	0.0318696	TRUE	+				4752	;P08238(IPI00414676)	GO:0016323;GO:0016324;GO:0031526;GO:0042470;GO:0016234;GO:0005737;GO:0008180;GO:0005829;GO:0005739;GO:0005622;GO:0009986	1;1;1;1;1;1;1;1;1;1;1	GO:0030235;GO:0005524;GO:0019901;GO:0005515;GO:0000166;GO:0032564;GO:0002134;GO:0017098;GO:0002135;GO:0030911;GO:0044325;GO:0051082;GO:0005525	1;1;1;1;1;1;1;1;1;1;1;1;1	GO:0032092;GO:0035872;GO:0006457;GO:0045793;GO:0045429;GO:0009651;GO:0071353;GO:0060338;GO:0032435;GO:0001890;GO:0071902;GO:0060334;GO:0007411;GO:0045087;GO:0043524;GO:0006986;GO:0006950;GO:0071407;GO:0033160;GO:0038096	1;1;1;1;1;1;1;1;1;1;1;1;1;1;1;1;1;1;1;1	mitochondrion;basolateral plasma membrane;melanosome;apical plasma membrane;intracellular;inclusion body;cytoplasm;cytosol;brush border membrane;cell surface;COP9 signalosome	1;1;1;1;1;1;1;1;1;1;1	protein kinase binding;ATP binding;nitric-oxide synthase regulator activity;GTP binding;sulfonylurea receptor binding;unfolded protein binding;UTP binding;nucleotide binding;CTP binding;protein binding;dATP binding;ion channel binding;TPR domain binding	1;1;1;1;1;1;1;1;1;1;1;1;1	cellular response to interleukin-4;positive regulation of protein import into nucleus, translocation;negative regulation of proteasomal ubiquitin-dependent protein catabolic process;response to unfolded protein;protein folding;axon guidance;response to stress;innate immune response;regulation of interferon-gamma-mediated signaling pathway;positive regulation of nitric oxide biosynthetic process;p…	1;1;1;1;1;1;1;1;1;1;1;1;1;1;1;1;1;1;1;1	P08238
4783	IPI:IPI00419237.3;IPI:IPI00789806.2	Cytosol aminopeptidase;Leucine aminopeptidase;Leucyl aminopeptidase;Leucine aminopeptidase 3;Proline aminopeptidase;Prolyl aminopeptidase;Peptidase S	LAP3;LAPEP;PEPS	Isoform 1 of Cytosol aminopeptidase;Isoform 2 of Cytosol aminopeptidase	P28838-1;P28838;P28838-2	AMPL_HUMAN	2	28	28	28	64.5	64.5	56.166	519	0	0.0364953	0.310228	0	0.0437705	0.312716	6	0.994192	1.70516	0.230282	0.620634	FALSE	44.0811	0.000514234	0.0235882	TRUE	+				4783	;P28838(IPI00789806;IPI00419237)	GO:0005737;GO:0005730;GO:0005739;GO:0005634;GO:0005622;GO:0005802	1;1;1;1;1;1	GO:0000287;GO:0008233;GO:0008235;GO:0016787;GO:0004177;GO:0008270;GO:0030145;GO:0046872	1;1;1;1;1;1;1;1	GO:0019538;GO:0006508	1;1	mitochondrion;nucleus;intracellular;cytoplasm;trans-Golgi network;nucleolus	1;1;1;1;1;1	magnesium ion binding;peptidase activity;hydrolase activity;metalloexopeptidase activity;aminopeptidase activity;manganese ion binding;zinc ion binding;metal ion binding	1;1;1;1;1;1;1;1	protein metabolic process;proteolysis	1;1	P28838
4800	IPI:IPI00419802.4	3-hydroxyisobutyryl-CoA hydrolase, mitochondrial;3-hydroxyisobutyryl-coenzyme A hydrolase	HIBCH	Isoform 1 of 3-hydroxyisobutyryl-CoA hydrolase, mitochondrial;Isoform 2 of 3-hydroxyisobutyryl-CoA hydrolase, mitochondrial	Q6NVY1-1;Q6NVY1;Q6NVY1-2	HIBCH_HUMAN	2	19	19	19	51.6	51.6	43.482	386	0	0.0497921	0.726655	0	0.0536995	0.722446	6	0.998117	10.5367	0.0088874	0.309054	FALSE	21.2031	0.00221694	0.0330512	TRUE	+				4800	;Q6NVY1(IPI00419802)	GO:0005759;GO:0005739	1;1	GO:0016787;GO:0003860	1;1	GO:0044281;GO:0006574;GO:0034641;GO:0009083	1;1;1;1	mitochondrion;mitochondrial matrix	1;1	hydrolase activity;3-hydroxyisobutyryl-CoA hydrolase activity	1;1	valine catabolic process;small molecule metabolic process;cellular nitrogen compound metabolic process;branched-chain amino acid catabolic process	1;1;1;1	Q6NVY1
4876	IPI:IPI00446986.3	FYN-binding protein;FYN-T-binding protein;FYB-120/130;p120/p130;SLP-76-associated phosphoprotein;SLAP-130;Adhesion and degranulation promoting adaptor protein	FYB;SLAP130	FYN-binding protein	O15117	FYB_HUMAN	1	10	10	9	13.9	13.9	85.386	783	0	0.0484882	0.422124	0	0.0420589	0.432561	6	0.994477	0.889598	0.467544	0.775685	FALSE	16.9486	0.00346317	0.0347039	TRUE	+				4876	;O15117(IPI00446986)	GO:0005737;GO:0005829;GO:0015629;GO:0005634	1;1;1;1	GO:0005102;GO:0005515	1;1	GO:0006607;GO:0007165;GO:0008150;GO:0006468;GO:0007243;GO:0050852;GO:0006955	1;1;1;1;1;1;1	nucleus;actin cytoskeleton;cytoplasm;cytosol	1;1;1;1	receptor binding;protein binding	1;1	NLS-bearing substrate import into nucleus;intracellular protein kinase cascade;protein phosphorylation;signal transduction;immune response;biological_process;T cell receptor signaling pathway	1;1;1;1;1;1;1	O15117
4881	IPI:IPI00449049.5	Poly [ADP-ribose] polymerase 1;ADPRT;NAD(+) ADP-ribosyltransferase 1;Poly[ADP-ribose] synthetase 1	PARP1;ADPRT;PPOL	Poly [ADP-ribose] polymerase 1	P09874	PARP1_HUMAN	1	47	47	47	50.5	50.5	113.08	1014	0	0.0676298	0.295392	0	0.0659631	0.284585	6	0.975837	5.36996	0.0329727	0.363788	FALSE	13.3122	0.00559559	0.0394424	TRUE	+				4881	;P09874(IPI00449049)	GO:0005635;GO:0005730;GO:0005667;GO:0005654;GO:0005634;GO:0043234	1;1;1;1;1;1	GO:0003677;GO:0047485;GO:0003950;GO:0005515;GO:0008270;GO:0051287;GO:0046872;GO:0016757;GO:0016740;GO:0008134	1;1;1;1;1;1;1;1;1;1	GO:0040009;GO:0000122;GO:0006471;GO:0006351;GO:0032869;GO:0006259;GO:0006302;GO:0042769;GO:0016540;GO:0006367;GO:0006284;GO:0006355;GO:0007179;GO:0006974;GO:0006281;GO:0070212;GO:0006366;GO:0010467;GO:0000723	1;1;1;1;1;1;1;1;1;1;1;1;1;1;1;1;1;1;1	nucleoplasm;transcription factor complex;nucleus;nuclear envelope;protein complex;nucleolus	1;1;1;1;1;1	NAD+ ADP-ribosyltransferase activity;transferase activity;DNA binding;NAD binding;protein N-terminus binding;transferase activity, transferring glycosyl groups;protein binding;transcription factor binding;zinc ion binding;metal ion binding	1;1;1;1;1;1;1;1;1;1	protein poly-ADP-ribosylation;DNA damage response, detection of DNA damage;transforming growth factor beta receptor signaling pathway;regulation of growth rate;telomere maintenance;protein autoprocessing;transcription from RNA polymerase II promoter;transcription, DNA-dependent;DNA metabolic process;double-strand break repair;regulation of transcription, DNA-dependent;response to DNA damage stimu…	1;1;1;1;1;1;1;1;1;1;1;1;1;1;1;1;1;1;1	P09874
4894	IPI:IPI00418169.3;IPI:IPI00455315.4	Annexin A2;Annexin-2;Annexin II;Lipocortin II;Calpactin I heavy chain;Chromobindin-8;p36;Protein I;Placental anticoagulant protein IV;Putative annexin A2-like protein;Annexin A2 pseudogene 2;Lipocortin II pseudogene	ANXA2;ANX2;ANX2L4;CAL1H;LPC2D;ANXA2P2;ANX2L2;ANX2P2;LPC2B	Isoform 2 of Annexin A2;Isoform 1 of Annexin A2;Putative annexin A2-like protein	P07355-2;P07355;P07355-1;A6NMY6	ANXA2_HUMAN;AXA2L_HUMAN	3	33	33	33	75.4	75.4	40.411	357	0	0.0645015	0.299056	0	0.0678881	0.300458	6	0.978778	2.51521	0.128337	0.530761	FALSE	27.5347	0.00131638	0.03031	TRUE	+				4894	;P07355(IPI00455315;IPI00418169)	GO:0042470;GO:0005737;GO:0030496;GO:0019897;GO:0005576;GO:0005886;GO:0005769;GO:0005604;GO:0070062;GO:0031012;GO:0035749;GO:0043220;GO:0005578;GO:0048471;GO:0005811;GO:0043234;GO:0042383	1;1;1;1;1;1;1;1;1;1;1;1;1;1;1;1;1	GO:0005544;GO:0004859;GO:0005515;GO:0017137;GO:0008092;GO:0005546;GO:0005509	1;1;1;1;1;1;1	GO:0030199;GO:0042730;GO:0001525;GO:0051099;GO:0001501;GO:0031340;GO:0071229;GO:0007589	1;1;1;1;1;1;1;1	extracellular matrix;extrinsic to plasma membrane;myelin sheath adaxonal region;midbody;proteinaceous extracellular matrix;basement membrane;plasma membrane;melanosome;sarcolemma;Schmidt-Lanterman incisure;protein complex;perinuclear region of cytoplasm;early endosome;cytoplasm;extracellular vesicular exosome;extracellular region;lipid particle	1;1;1;1;1;1;1;1;1;1;1;1;1;1;1;1;1	phospholipase inhibitor activity;phosphatidylinositol-4,5-bisphosphate binding;Rab GTPase binding;cytoskeletal protein binding;calcium-dependent phospholipid binding;protein binding;calcium ion binding	1;1;1;1;1;1;1	positive regulation of binding;skeletal system development;body fluid secretion;positive regulation of vesicle fusion;cellular response to acid;fibrinolysis;collagen fibril organization;angiogenesis	1;1;1;1;1;1;1;1	P07355
4955	IPI:IPI00465294.2	Cell division cycle 5-like protein;Pombe cdc5-related protein	CDC5L;KIAA0432;PCDC5RP	Cell division cycle 5-like protein	Q99459	CDC5L_HUMAN	1	20	20	20	26.9	26.9	92.25	802	0	0.0324449	0.154495	0	0.0615211	0.165172	6	0.979971	1.53584	0.264365	0.644623	FALSE	11.7596	0.00715381	0.0433664	TRUE	+				4955	;Q99459(IPI00465294)	GO:0000974;GO:0005737;GO:0005730;GO:0005681;GO:0005634;GO:0016607;GO:0071013	1;1;1;1;1;1;1	GO:0003677;GO:0003723;GO:0005515;GO:0003682;GO:0019904;GO:0071987	1;1;1;1;1;1	GO:0006397;GO:0006351;GO:0000398;GO:0008380;GO:0006355;GO:0007049	1;1;1;1;1;1	nuclear speck;catalytic step 2 spliceosome;nucleus;Prp19 complex;spliceosomal complex;cytoplasm;nucleolus	1;1;1;1;1;1;1	WD40-repeat domain binding;DNA binding;RNA binding;chromatin binding;protein binding;protein domain specific binding	1;1;1;1;1;1	transcription, DNA-dependent;regulation of transcription, DNA-dependent;RNA splicing;mRNA processing;cell cycle;mRNA splicing, via spliceosome	1;1;1;1;1;1	Q99459
5003	IPI:IPI00473014.5	Destrin;Actin-depolymerizing factor	DSTN;ACTDP;DSN	Destrin	P60981	DEST_HUMAN	1	12	11	11	69.7	63	18.506	165	0	0.135481	0.520875	0	0.113619	0.482739	6	0.968074	5.18978	0.0351804	0.372441	FALSE	11.8667	0.00702654	0.0432984	TRUE	+				5003	;P60981(IPI00473014)	GO:0005737;GO:0030864;GO:0015629;GO:0005622	1;1;1;1	GO:0003779	1	GO:0030836;GO:0008154;GO:0030042;GO:0000910;GO:0051014;GO:0006928	1;1;1;1;1;1	cortical actin cytoskeleton;intracellular;actin cytoskeleton;cytoplasm	1;1;1;1	actin binding	1	actin polymerization or depolymerization;positive regulation of actin filament depolymerization;actin filament severing;cytokinesis;cellular component movement;actin filament depolymerization	1;1;1;1;1;1	P60981
5043	IPI:IPI00479306.1	Proteasome subunit beta type-5;Proteasome epsilon chain;Macropain epsilon chain;Multicatalytic endopeptidase complex epsilon chain;Proteasome subunit X;Proteasome chain 6;Proteasome subunit MB1	PSMB5;LMPX	Proteasome subunit beta type-5	P28074	PSB5_HUMAN	1	9	9	9	42.2	42.2	28.48	263	0	0.0125278	0.19058	0	0.0252176	0.188432	6	0.998272	1.30955	0.320566	0.683662	FALSE	18.7889	0.0028207	0.0347039	TRUE	+				5043	;P28074(IPI00479306)	GO:0000502;GO:0005737;GO:0005829;GO:0005654;GO:0005634;GO:0005839	1;1;1;1;1;1	GO:0008233;GO:0005515;GO:0016787;GO:0004175;GO:0004298	1;1;1;1;1	GO:0006915;GO:0042590;GO:0006979;GO:0000278;GO:0006521;GO:0044281;GO:0016070;GO:0051436;GO:0031145;GO:0016071;GO:0051603;GO:0000209;GO:0043066;GO:0016032;GO:0006508;GO:0034641;GO:0002479;GO:0000082;GO:0051439;GO:0002474;GO:0051437;GO:0010467;GO:0043161;GO:0019048;GO:0006977;GO:0042981	1;1;1;1;1;1;1;1;1;1;1;1;1;1;1;1;1;1;1;1;1;1;1;1;1;1	proteasome core complex;nucleoplasm;proteasome complex;nucleus;cytoplasm;cytosol	1;1;1;1;1;1	endopeptidase activity;peptidase activity;hydrolase activity;threonine-type endopeptidase activity;protein binding	1;1;1;1;1	antigen processing and presentation of peptide antigen via MHC class I;mitotic cell cycle;anaphase-promoting complex-dependent proteasomal ubiquitin-dependent protein catabolic process;DNA damage response, signal transduction by p53 class mediator resulting in cell cycle arrest;positive regulation of ubiquitin-protein ligase activity involved in mitotic cell cycle;proteasomal ubiquitin-dependent …	1;1;1;1;1;1;1;1;1;1;1;1;1;1;1;1;1;1;1;1;1;1;1;1;1;1	P28074
5102	IPI:IPI00550192.2;IPI:IPI00795212.1	Probable Xaa-Pro aminopeptidase 3;Aminopeptidase P3	XPNPEP3	Isoform 1 of Probable Xaa-Pro aminopeptidase 3;Isoform 2 of Probable Xaa-Pro aminopeptidase 3	Q9NQH7-1;Q9NQH7;Q9NQH7-2	XPP3_HUMAN	2	5	5	5	12.6	12.6	57.033	507	0	-0.0387175	0.303793	0	-0.0787731	0.296662	6	0.99466	-1.90485	0.19709	0.597601	FALSE	14.0351	0.00503826	0.0379225	TRUE	+				5102	;Q9NQH7(IPI00795212;IPI00550192)	GO:0005739	1	GO:0008233;GO:0016787;GO:0004177;GO:0008237;GO:0030145;GO:0046872	1;1;1;1;1;1	GO:0016485;GO:0003094;GO:0006508;GO:0009987	1;1;1;1	mitochondrion	1	metallopeptidase activity;peptidase activity;hydrolase activity;aminopeptidase activity;manganese ion binding;metal ion binding	1;1;1;1;1;1	cellular process;proteolysis;protein processing;glomerular filtration	1;1;1;1	Q9NQH7
5104	IPI:IPI00550234.4	Actin-related protein 2/3 complex subunit 5;Arp2/3 complex 16 kDa subunit	ARPC5;ARC16	Isoform 1 of Actin-related protein 2/3 complex subunit 5;Isoform 2 of Actin-related protein 2/3 complex subunit 5	O15511-1;O15511;O15511-2	ARPC5_HUMAN	2	4	4	4	33.1	33.1	16.32	151	0	0.110048	0.472432	0	0.0808644	0.452318	6	0.974911	2.13959	0.165764	0.569812	FALSE	11.2645	0.00778901	0.0442336	TRUE	+				5104	;O15511(IPI00550234)	GO:0042995;GO:0005737;GO:0005829;GO:0015629;GO:0005856;GO:0005885	1;1;1;1;1;1	GO:0005515;GO:0005200;GO:0003779	1;1;1	GO:0030833;GO:0030036;GO:0045087;GO:0006928;GO:0038096	1;1;1;1;1	cell projection;Arp2/3 protein complex;actin cytoskeleton;cytoplasm;cytosol;cytoskeleton	1;1;1;1;1;1	structural constituent of cytoskeleton;actin binding;protein binding	1;1;1	actin cytoskeleton organization;innate immune response;regulation of actin filament polymerization;cellular component movement;Fc-gamma receptor signaling pathway involved in phagocytosis	1;1;1;1;1	O15511
5120	IPI:IPI00550746.4	Nuclear migration protein nudC;Nuclear distribution protein C homolog	NUDC	Nuclear migration protein nudC	Q9Y266	NUDC_HUMAN	1	27	27	27	66.2	66.2	38.242	331	0	0.110858	0.557838	0	0.107086	0.561083	6	0.982227	6.25889	0.0245897	0.357252	FALSE	20.4772	0.00237635	0.0330512	TRUE	+				5120	;Q9Y266(IPI00550746)	GO:0005874;GO:0005737;GO:0005829;GO:0005856;GO:0005654;GO:0005634	1;1;1;1;1;1			GO:0007067;GO:0000278;GO:0051301;GO:0000910;GO:0007275;GO:0008283;GO:0007049	1;1;1;1;1;1;1	nucleoplasm;nucleus;cytoplasm;cytosol;cytoskeleton;microtubule	1;1;1;1;1;1			mitotic cell cycle;cell division;cell proliferation;mitosis;cytokinesis;cell cycle;multicellular organismal development	1;1;1;1;1;1;1	Q9Y266
5152	IPI:IPI00553185.2	T-complex protein 1 subunit gamma;CCT-gamma	CCT3;CCTG;TRIC5	T-complex protein 1 subunit gamma	P49368	TCPG_HUMAN	1	45	45	45	75.8	75.8	60.533	545	0	0.0494969	0.243806	0	0.042553	0.246158	6	0.981387	5.25157	0.0343995	0.368832	FALSE	57.5565	0.000301727	0.0198812	TRUE	+				5152	;P49368(IPI00553185)	GO:0005874;GO:0005737;GO:0005832;GO:0005829;GO:0005886;GO:0002199;GO:0005856	1;1;1;1;1;1;1	GO:0005524;GO:0005515;GO:0000166;GO:0051082	1;1;1;1	GO:0006457;GO:0007339;GO:0044267;GO:0051084	1;1;1;1	plasma membrane;zona pellucida receptor complex;chaperonin-containing T-complex;cytoplasm;cytosol;cytoskeleton;microtubule	1;1;1;1;1;1;1	ATP binding;unfolded protein binding;nucleotide binding;protein binding	1;1;1;1	protein folding;binding of sperm to zona pellucida;cellular protein metabolic process;'de novo' posttranslational protein folding	1;1;1;1	P49368
5170	IPI:IPI00554811.2	Actin-related protein 2/3 complex subunit 4;Arp2/3 complex 20 kDa subunit	ARPC4;ARC20	Actin-related protein 2/3 complex subunit 4	P59998	ARPC4_HUMAN	1	9	9	9	45.2	45.2	19.667	168	0	0.0411773	0.420346	0	0.0371119	0.400013	6	0.996045	1.10842	0.383124	0.730673	FALSE	16.2841	0.00374993	0.0353912	TRUE	+				5170	;P59998(IPI00554811)	GO:0042995;GO:0005737;GO:0005829;GO:0005856;GO:0005885	1;1;1;1;1	GO:0051015;GO:0030674;GO:0005515;GO:0003779	1;1;1;1	GO:0034314;GO:0030041;GO:0045010;GO:0045087;GO:0038096	1;1;1;1;1	cell projection;Arp2/3 protein complex;cytoplasm;cytosol;cytoskeleton	1;1;1;1;1	protein binding, bridging;actin binding;protein binding;actin filament binding	1;1;1;1	actin filament polymerization;innate immune response;actin nucleation;Arp2/3 complex-mediated actin nucleation;Fc-gamma receptor signaling pathway involved in phagocytosis	1;1;1;1;1	P59998
5195	IPI:IPI00607554.1	Ubiquitin carboxyl-terminal hydrolase 47;Ubiquitin thioesterase 47;Ubiquitin-specific-processing protease 47;Deubiquitinating enzyme 47	USP47	Isoform 1 of Ubiquitin carboxyl-terminal hydrolase 47;Isoform 2 of Ubiquitin carboxyl-terminal hydrolase 47	Q96K76-1;Q96K76;Q96K76-2	UBP47_HUMAN	3	20	20	20	18	18	157.27	1375	0	0.0912904	0.61313	0	0.0754935	0.642943	6	0.990435	3.90865	0.0596582	0.421426	FALSE	19.2778	0.00268	0.0347039	TRUE	+				5195	;Q96K76(IPI00607554)	GO:0005737;GO:0019005	1;1	GO:0004843;GO:0008233;GO:0016787;GO:0008234;GO:0005515;GO:0004221;GO:0071987	1;1;1;1;1;1;1	GO:0034644;GO:0030307;GO:0010972;GO:0006511;GO:0043154;GO:0045892;GO:0042493;GO:0043066;GO:0006508;GO:0006284;GO:0035520;GO:0006974;GO:0006281	1;1;1;1;1;1;1;1;1;1;1;1;1	SCF ubiquitin ligase complex;cytoplasm	1;1	cysteine-type peptidase activity;ubiquitin-specific protease activity;WD40-repeat domain binding;peptidase activity;hydrolase activity;ubiquitin thiolesterase activity;protein binding	1;1;1;1;1;1;1	cellular response to UV;monoubiquitinated protein deubiquitination;negative regulation of transcription, DNA-dependent;positive regulation of cell growth;negative regulation of G2/M transition of mitotic cell cycle;response to drug;response to DNA damage stimulus;negative regulation of apoptotic process;DNA repair;proteolysis;base-excision repair;negative regulation of cysteine-type endopeptidase…	1;1;1;1;1;1;1;1;1;1;1;1;1	Q96K76
5206	IPI:IPI00639931.2	Adenylyl cyclase-associated protein 1	CAP1;CAP	Isoform 2 of Adenylyl cyclase-associated protein 1	Q01518-2;Q01518	CAP1_HUMAN	1	31	31	1	54.6	4.6	51.784	474	0	0.0364953	0.320834	0	0.0471532	0.309665	6	0.994589	3.21239	0.0847648	0.465784	FALSE	21.1076	0.00223699	0.0330512	TRUE	+				5206	;Q01518(IPI00639931)	GO:0016020;GO:0005737;GO:0030864;GO:0005886	1;1;1;1	GO:0003779	1	GO:0007596;GO:0030036;GO:0007165;GO:0030168;GO:0007163;GO:0000902;GO:0001667;GO:0002576;GO:0007411;GO:0006898;GO:0007010;GO:0007190	1;1;1;1;1;1;1;1;1;1;1;1	plasma membrane;cortical actin cytoskeleton;cytoplasm;membrane	1;1;1;1	actin binding	1	platelet degranulation;ameboidal cell migration;platelet activation;actin cytoskeleton organization;receptor-mediated endocytosis;cytoskeleton organization;axon guidance;signal transduction;cell morphogenesis;activation of adenylate cyclase activity;blood coagulation;establishment or maintenance of cell polarity	1;1;1;1;1;1;1;1;1;1;1;1	Q01518
5216	IPI:IPI00746934.2;IPI:IPI00843999.2;IPI:IPI00640981.3;IPI:IPI00646605.3	E3 ubiquitin-protein ligase UBR4;N-recognin-4;Zinc finger UBR1-type protein 1;Retinoblastoma-associated factor of 600 kDa;600 kDa retinoblastoma protein-associated factor;RBAF600;p600	UBR4;KIAA0462;KIAA1307;RBAF600;ZUBR1	Isoform 2 of E3 ubiquitin-protein ligase UBR4;Isoform 1 of E3 ubiquitin-protein ligase UBR4;Isoform 4 of E3 ubiquitin-protein ligase UBR4;Isoform 3 of E3 ubiquitin-protein ligase UBR4	Q5T4S7-2;Q5T4S7;Q5T4S7-1;Q5T4S7-4;Q5T4S7-3	UBR4_HUMAN	6	73	73	73	18.2	18.2	575.95	5204	0	-0.00330793	0.130429	0	-0.0242954	0.131883	6	0.999765	-0.775794	0.519045	0.797085	FALSE	11.6696	0.0072633	0.043741	TRUE	+				5216	;Q5T4S7(IPI00843999;IPI00646605;IPI00640981;IPI00746934)	GO:0016020;GO:0005737;GO:0016021;GO:0005856;GO:0005634	1;1;1;1;1	GO:0016874;GO:0008270;GO:0005516;GO:0004842;GO:0046872	1;1;1;1;1	GO:0016567;GO:0019048	1;1	integral to membrane;nucleus;cytoplasm;cytoskeleton;membrane	1;1;1;1;1	calmodulin binding;ubiquitin-protein ligase activity;ligase activity;zinc ion binding;metal ion binding	1;1;1;1;1	modulation by virus of host morphology or physiology;protein ubiquitination	1;1	Q5T4S7
5232	IPI:IPI00642256.2	F-actin-capping protein subunit beta;CapZ beta	CAPZB	Isoform 2 of F-actin-capping protein subunit beta;Isoform 1 of F-actin-capping protein subunit beta	P47756-2;P47756;P47756-1	CAPZB_HUMAN	2	24	24	24	71.7	71.7	30.628	272	0	0.0108018	0.262349	0	0.0385859	0.253492	6	0.999338	1.03596	0.409055	0.742786	FALSE	19.6404	0.00258235	0.0344775	TRUE	+				5232	;P47756(IPI00642256)	GO:0016020;GO:0071203;GO:0005737;GO:0008290;GO:0030863;GO:0030018;GO:0005829;GO:0015629;GO:0014704;GO:0005856;GO:0001669;GO:0030017;GO:0030027	1;1;1;1;1;1;1;1;1;1;1;1;1	GO:0051015;GO:0048487;GO:0003779	1;1;1	GO:0007596;GO:0048747;GO:0051693;GO:0030036;GO:0030032;GO:0051016;GO:0030030;GO:0031115;GO:0007010;GO:0031175;GO:0006928;GO:0022604	1;1;1;1;1;1;1;1;1;1;1;1	Z disc;sarcomere;WASH complex;acrosomal vesicle;intercalated disc;cortical cytoskeleton;F-actin capping protein complex;actin cytoskeleton;cytoplasm;cytosol;cytoskeleton;lamellipodium;membrane	1;1;1;1;1;1;1;1;1;1;1;1;1	beta-tubulin binding;actin binding;actin filament binding	1;1;1	neuron projection development;muscle fiber development;regulation of cell morphogenesis;negative regulation of microtubule polymerization;actin cytoskeleton organization;cytoskeleton organization;barbed-end actin filament capping;lamellipodium assembly;blood coagulation;cellular component movement;actin filament capping;cell projection organization	1;1;1;1;1;1;1;1;1;1;1;1	P47756
5285	IPI:IPI00647892.1;IPI:IPI00647106.1	Disks large-associated protein 5;Disks large-associated protein DLG7;Discs large homolog 7;Hepatoma up-regulated protein	DLGAP5;DLG7;KIAA0008	Isoform 1 of Disks large-associated protein 5;Isoform 2 of Disks large-associated protein 5	Q15398-2;Q15398;Q15398-1	DLGP5_HUMAN	2	15	15	15	24	24	95.114	846	0	0.0962459	1.00721	0	-0.00470998	0.963676	6	0.996245	-0.0334748	0.976336	0.99112	FALSE	14.5481	0.00469162	0.0374517	TRUE	+				5285	;Q15398(IPI00647106;IPI00647892)	GO:0005737;GO:0005819;GO:0005856;GO:0005634;GO:0031616	1;1;1;1;1	GO:0005515;GO:0004721	1;1	GO:0045842;GO:0007079;GO:0007267;GO:0000087;GO:0008283;GO:0007049	1;1;1;1;1;1	nucleus;spindle pole centrosome;spindle;cytoplasm;cytoskeleton	1;1;1;1;1	protein binding;phosphoprotein phosphatase activity	1;1	cell-cell signaling;cell proliferation;mitotic chromosome movement towards spindle pole;positive regulation of mitotic metaphase/anaphase transition;M phase of mitotic cell cycle;cell cycle	1;1;1;1;1;1	Q15398
5308	IPI:IPI00657706.1;IPI:IPI00885058.1	Lysophospholipid acyltransferase 7;1-acylglycerophosphatidylinositol O-acyltransferase;Lysophosphatidylinositol acyltransferase;Leukocyte receptor cluster member 4;Bladder and breast carcinoma-overexpressed gene 1 protein;Membrane-bound O-acyltransferase domain-containing protein 7	MBOAT7;BB1;LENG4;OACT7	Isoform 1 of Lysophospholipid acyltransferase 7;Isoform 2 of Lysophospholipid acyltransferase 7;Isoform 3 of Lysophospholipid acyltransferase 7	Q96N66-1;Q96N66;Q96N66-2;Q96N66-3	MBOA7_HUMAN	3	5	5	5	14.6	14.6	52.764	472	0	0.084296	1.20624	0	0.0411555	1.22329	6	0.998039	0.491292	0.671842	0.878327	FALSE	20.6254	0.00234243	0.0330512	TRUE	+				5308	;Q96N66(IPI00657706;IPI00885058)	GO:0016020;GO:0016021;GO:0005789	1;1;1	GO:0005515;GO:0016747;GO:0016746;GO:0016740	1;1;1;1	GO:0008654;GO:0006629;GO:0044281;GO:0046474;GO:0021591;GO:0036149;GO:0006644	1;1;1;1;1;1;1	integral to membrane;endoplasmic reticulum membrane;membrane	1;1;1	transferase activity, transferring acyl groups other than amino-acyl groups;transferase activity;transferase activity, transferring acyl groups;protein binding	1;1;1;1	lipid metabolic process;ventricular system development;small molecule metabolic process;phospholipid biosynthetic process;phosphatidylinositol acyl-chain remodeling;phospholipid metabolic process;glycerophospholipid biosynthetic process	1;1;1;1;1;1;1	Q96N66
5323	IPI:IPI00735181.2	Protein unc-45 homolog A;GCUNC-45;Smooth muscle cell-associated protein 1	UNC45A;SMAP1	Isoform 2 of Protein unc-45 homolog A	Q9H3U1-2;Q9H3U1	UN45A_HUMAN	1	25	25	1	29.2	1.1	101.67	929	0	0.00594746	0.23138	0	0.0156367	0.236324	6	0.999746	0.979676	0.430552	0.753548	FALSE	10.3451	0.00921492	0.0478642	TRUE	+				5323	;Q9H3U1(IPI00735181)	GO:0005737;GO:0005634;GO:0048471	1;1;1	GO:0051879	1	GO:0061077;GO:0007517;GO:0030154;GO:0007275	1;1;1;1	nucleus;perinuclear region of cytoplasm;cytoplasm	1;1;1	Hsp90 protein binding	1	cell differentiation;muscle organ development;chaperone-mediated protein folding;multicellular organismal development	1;1;1;1	Q9H3U1
5352	IPI:IPI00744507.1	Casein kinase II subunit alpha	CSNK2A1;CK2A1	Casein kinase II subunit alpha	P68400	CSK21_HUMAN	4	22	22	21	56.8	56.8	45.143	391	0	0.0200594	0.161641	0	0.0154308	0.152249	6	0.993499	1.25761	0.335479	0.692344	FALSE	15.1292	0.00434044	0.0372054	TRUE	+				5352	;P68400(IPI00744507)	GO:0005829;GO:0005886;GO:0005634;GO:0016580;GO:0016581;GO:0031519	1;1;1;1;1;1	GO:0005524;GO:0047485;GO:0019888;GO:0051879;GO:0005515;GO:0004672;GO:0000166;GO:0016301;GO:0004674;GO:0016740;GO:0008013;GO:0016772	1;1;1;1;1;1;1;1;1;1;1;1	GO:0061077;GO:0007165;GO:0006915;GO:0046777;GO:0016055;GO:0000278;GO:0030307;GO:0006351;GO:0043154;GO:0016310;GO:0007411;GO:0071174;GO:0006468;GO:0006355;GO:0030177;GO:0045732;GO:0007049;GO:0008284	1;1;1;1;1;1;1;1;1;1;1;1;1;1;1;1;1;1	NuRD complex;nucleus;plasma membrane;PcG protein complex;cytosol;Sin3 complex	1;1;1;1;1;1	transferase activity;transferase activity, transferring phosphorus-containing groups;ATP binding;Hsp90 protein binding;protein N-terminus binding;beta-catenin binding;protein serine/threonine kinase activity;protein kinase activity;nucleotide binding;protein binding;kinase activity;protein phosphatase regulator activity	1;1;1;1;1;1;1;1;1;1;1;1	mitotic cell cycle;positive regulation of Wnt receptor signaling pathway;positive regulation of cell growth;Wnt receptor signaling pathway;transcription, DNA-dependent;chaperone-mediated protein folding;protein autophosphorylation;apoptotic process;protein phosphorylation;regulation of transcription, DNA-dependent;axon guidance;signal transduction;mitotic spindle checkpoint;cell cycle;phosphoryla…	1;1;1;1;1;1;1;1;1;1;1;1;1;1;1;1;1;1	P68400
5398	IPI:IPI00024915.2;IPI:IPI00759663.1	Peroxiredoxin-5, mitochondrial;Prx-V;Peroxisomal antioxidant enzyme;PLP;Thioredoxin reductase;Thioredoxin peroxidase PMP20;Antioxidant enzyme B166;TPx type VI;Liver tissue 2D-page spot 71B;Alu corepressor 1	PRDX5;ACR1;SBBI10	Isoform Mitochondrial of Peroxiredoxin-5, mitochondrial;Isoform Cytoplasmic+peroxisomal of Peroxiredoxin-5, mitochondrial	P30044-1;P30044;P30044-2	PRDX5_HUMAN	2	11	11	11	47.2	47.2	22.026	214	0	0.0583049	0.358438	0	0.0647288	0.357751	6	0.988446	1.09264	0.38861	0.733233	FALSE	16.0708	0.00384958	0.0355093	TRUE	+				5398	;P30044(IPI00024915;IPI00759663)	GO:0031410;GO:0005777;GO:0005737;GO:0005829;GO:0005739;GO:0043231;GO:0005634;GO:0005782;GO:0048471	1;1;1;1;1;1;1;1;1	GO:0043027;GO:0005102;GO:0046983;GO:0016209;GO:0001016;GO:0016491;GO:0051920;GO:0004601;GO:0072541	1;1;1;1;1;1;1;1;1	GO:2001141;GO:0060785;GO:0006979;GO:0034614;GO:0055114;GO:0006954;GO:0070995;GO:0043154;GO:0032967;GO:0051354;GO:0043066;GO:2001057;GO:0042744;GO:0016480	1;1;1;1;1;1;1;1;1;1;1;1;1;1	mitochondrion;nucleus;intracellular membrane-bounded organelle;peroxisome;perinuclear region of cytoplasm;cytoplasm;cytosol;cytoplasmic vesicle;peroxisomal matrix	1;1;1;1;1;1;1;1;1	peroxynitrite reductase activity;oxidoreductase activity;peroxiredoxin activity;protein dimerization activity;cysteine-type endopeptidase inhibitor activity involved in apoptotic process;receptor binding;RNA polymerase III regulatory region DNA binding;peroxidase activity;antioxidant activity	1;1;1;1;1;1;1;1;1	oxidation-reduction process;inflammatory response;cellular response to reactive oxygen species;hydrogen peroxide catabolic process;positive regulation of collagen biosynthetic process;negative regulation of oxidoreductase activity;regulation of apoptosis involved in tissue homeostasis;negative regulation of apoptotic process;response to oxidative stress;regulation of RNA biosynthetic process;reac…	1;1;1;1;1;1;1;1;1;1;1;1;1;1	P30044
5431	IPI:IPI00783982.1	Coatomer subunit gamma;Gamma-coat protein	COPG;COPG1	Coatomer subunit gamma	Q9Y678	COPG_HUMAN	1	34	34	30	49.7	44.1	97.717	874	0	0.0544415	0.327794	0	0.0468152	0.334571	6	0.98792	4.08685	0.0549806	0.409254	FALSE	31.0913	0.00103288	0.0294218	TRUE	+				5431	;Q9Y678(IPI00783982)	GO:0016020;GO:0031410;GO:0005737;GO:0000139;GO:0005829;GO:0030663;GO:0005634;GO:0030126;GO:0030117;GO:0005794	1;1;1;1;1;1;1;1;1;1	GO:0005198	1	GO:0015031;GO:0051683;GO:0006810;GO:0072384;GO:0048205;GO:0006886;GO:0016044;GO:0016192;GO:0006890	1;1;1;1;1;1;1;1;1	COPI-coated vesicle membrane;Golgi membrane;COPI vesicle coat;nucleus;membrane coat;Golgi apparatus;cytoplasm;cytosol;cytoplasmic vesicle;membrane	1;1;1;1;1;1;1;1;1;1	structural molecule activity	1	intracellular protein transport;cellular membrane organization;vesicle-mediated transport;transport;establishment of Golgi localization;organelle transport along microtubule;COPI coating of Golgi vesicle;protein transport;retrograde vesicle-mediated transport, Golgi to ER	1;1;1;1;1;1;1;1;1	Q9Y678
5437	IPI:IPI00784090.2	T-complex protein 1 subunit theta;CCT-theta;Renal carcinoma antigen NY-REN-15	CCT8;CCTQ;KIAA0002	T-complex protein 1 subunit theta	P50990	TCPQ_HUMAN	1	46	46	46	72.8	72.8	59.62	548	0	0.0216023	0.127092	0	0.0329522	0.12519	6	0.987306	2.64949	0.117806	0.524563	FALSE	16.9612	0.00345803	0.0347039	TRUE	+				5437	;P50990(IPI00784090)	GO:0005874;GO:0005737;GO:0005832;GO:0005829;GO:0002199;GO:0005856;GO:0005815;GO:0045111;GO:0016235;GO:0005813	1;1;1;1;1;1;1;1;1;1	GO:0005524;GO:0000166;GO:0042623;GO:0051082	1;1;1;1	GO:0006457;GO:0007339;GO:0044267;GO:0051084	1;1;1;1	aggresome;microtubule organizing center;intermediate filament cytoskeleton;zona pellucida receptor complex;centrosome;chaperonin-containing T-complex;cytoplasm;cytosol;cytoskeleton;microtubule	1;1;1;1;1;1;1;1;1;1	ATP binding;unfolded protein binding;nucleotide binding;ATPase activity, coupled	1;1;1;1	protein folding;binding of sperm to zona pellucida;cellular protein metabolic process;'de novo' posttranslational protein folding	1;1;1;1	P50990
5440	IPI:IPI00784154.1	60 kDa heat shock protein, mitochondrial;Heat shock protein 60;60 kDa chaperonin;Chaperonin 60;Mitochondrial matrix protein P1;P60 lymphocyte protein;HuCHA60	HSPD1;HSP60	60 kDa heat shock protein, mitochondrial	P10809	CH60_HUMAN	1	61	61	61	78.2	78.2	61.054	573	0	0.0823549	0.677204	0	0.0874059	0.666663	6	0.993771	3.71085	0.0655588	0.427281	FALSE	34.1931	0.000854211	0.0281262	TRUE	+				5440	;P10809(IPI00784154)	GO:0005759;GO:0005615;GO:0005737;GO:0046696;GO:0005829;GO:0030135;GO:0005739;GO:0005886;GO:0005769;GO:0043231;GO:0019907;GO:0030141;GO:0009986;GO:0005905;GO:0005743	1;1;1;1;1;1;1;1;1;1;1;1;1;1;1	GO:0003688;GO:0005524;GO:0051087;GO:0003697;GO:0005515;GO:0000166;GO:0016887;GO:0002039;GO:0001530;GO:0051082	1;1;1;1;1;1;1;1;1;1	GO:0042110;GO:0006457;GO:0006458;GO:0006919;GO:0032733;GO:0002842;GO:0048291;GO:0002755;GO:0042026;GO:0044267;GO:0043065;GO:0032729;GO:0043032;GO:0043066;GO:0042100;GO:0042113;GO:0032755;GO:0006986;GO:0032735;GO:0032727;GO:0008219;GO:0050870;GO:0051131;GO:0002368;GO:0006200;GO:0051604;GO:0019048;GO:0050821	1;1;1;1;1;1;1;1;1;1;1;1;1;1;1;1;1;1;1;1;1;1;1;1;1;1;1;1	mitochondrion;mitochondrial inner membrane;cyclin-dependent protein kinase activating kinase holoenzyme complex;extracellular space;plasma membrane;lipopolysaccharide receptor complex;mitochondrial matrix;intracellular membrane-bounded organelle;early endosome;cytoplasm;coated pit;secretory granule;cytosol;coated vesicle;cell surface	1;1;1;1;1;1;1;1;1;1;1;1;1;1;1	DNA replication origin binding;lipopolysaccharide binding;ATP binding;ATPase activity;chaperone binding;unfolded protein binding;single-stranded DNA binding;p53 binding;nucleotide binding;protein binding	1;1;1;1;1;1;1;1;1;1	B cell activation;B cell cytokine production;cell death;response to unfolded protein;protein stabilization;chaperone-mediated protein complex assembly;B cell proliferation;protein refolding;positive regulation of interferon-gamma production;positive regulation of macrophage activation;protein folding;positive regulation of interferon-alpha production;positive regulation of T cell activation;cellu…	1;1;1;1;1;1;1;1;1;1;1;1;1;1;1;1;1;1;1;1;1;1;1;1;1;1;1;1	P10809
5452	IPI:IPI00785096.5	Basic leucine zipper and W2 domain-containing protein 1;Protein Orf;Putative basic leucine zipper and W2 domain-containing protein 1-like 1	BZW1;BZAP45;KIAA0005;BZW1L1	Isoform 1 of Basic leucine zipper and W2 domain-containing protein 1;Isoform 2 of Basic leucine zipper and W2 domain-containing protein 1;Putative basic leucine zipper and W2 domain-containing protein 1-like 1	Q7L1Q6-1;Q7L1Q6;Q7L1Q6-2;P0C7T9	BZW1_HUMAN;BZW1L_HUMAN	3	17	17	15	35.6	32.5	48.043	419	0	-0.0459819	0.27847	0	-0.0742368	0.281069	6	0.991388	-1.66379	0.238059	0.62479	FALSE	17.4904	0.00325294	0.0347039	TRUE	+				5452	;Q7L1Q6(IPI00785096)	GO:0005737	1			GO:0016070;GO:0006351;GO:0006355	1;1;1	cytoplasm	1			transcription, DNA-dependent;RNA metabolic process;regulation of transcription, DNA-dependent	1;1;1	Q7L1Q6
5507	IPI:IPI00815770.2	Sorting nexin-3;Protein SDP3	SNX3	Isoform 1 of Sorting nexin-3;Isoform 4 of Sorting nexin-3;Isoform 2 of Sorting nexin-3;Isoform 3 of Sorting nexin-3	O60493-1;O60493;O60493-4;O60493-2;O60493-3	SNX3_HUMAN	4	10	10	9	50	45.7	18.762	162	0	0.162559	0.88394	0	0.128432	0.841203	6	0.984965	2.7391	0.111443	0.520419	FALSE	14.7892	0.00454094	0.0373904	TRUE	+				5507	;O60493(IPI00815770)	GO:0010008;GO:0005737;GO:0005829;GO:0005769;GO:0005768	1;1;1;1;1	GO:0019903;GO:0005515;GO:0032266;GO:0035091;GO:0008289	1;1;1;1;1	GO:0015031;GO:0007154;GO:0006810;GO:0006897	1;1;1;1	endosome;early endosome;cytoplasm;cytosol;endosome membrane	1;1;1;1;1	protein phosphatase binding;phosphatidylinositol binding;phosphatidylinositol-3-phosphate binding;lipid binding;protein binding	1;1;1;1;1	transport;cell communication;protein transport;endocytosis	1;1;1;1	O60493
5514	IPI:IPI00828150.1	Suppressor of G2 allele of SKP1 homolog;Sgt1;Putative 40-6-3 protein	SUGT1	Isoform 1 of Suppressor of G2 allele of SKP1 homolog;Isoform 2 of Suppressor of G2 allele of SKP1 homolog	Q9Y2Z0-1;Q9Y2Z0;Q9Y2Z0-2	SUGT1_HUMAN	2	21	21	21	57	57	41.024	365	0	0.0666859	0.599096	0	0.0589414	0.578787	6	0.99483	1.35171	0.30905	0.680282	FALSE	11.6072	0.00734073	0.0437987	TRUE	+				5514	;Q9Y2Z0(IPI00828150)	GO:0005737;GO:0005829;GO:0005634;GO:0000151;GO:0000776	1;1;1;1;1			GO:0007067;GO:0035872;GO:0045087	1;1;1	ubiquitin ligase complex;nucleus;kinetochore;cytoplasm;cytosol	1;1;1;1;1			innate immune response;mitosis;nucleotide-binding domain, leucine rich repeat containing receptor signaling pathway	1;1;1	Q9Y2Z0
5566	IPI:IPI00855788.1	Nucleolar and spindle-associated protein 1	NUSAP1;ANKT;BM-037;PRO0310	Isoform 4 of Nucleolar and spindle-associated protein 1	Q9BXS6-4;Q9BXS6	NUSAP_HUMAN	1	11	11	1	34.6	4.7	47.569	425	0	-0.00666302	1.52858	0	-0.0407285	1.45004	6	0.999993	-0.55388	0.635319	0.861991	FALSE	15.862	0.003951	0.0357004	TRUE	+				5566	;Q9BXS6(IPI00855788)	GO:0005874;GO:0005737;GO:0005730;GO:0005819;GO:0005876;GO:0005856;GO:0005634;GO:0005694	1;1;1;1;1;1;1;1	GO:0003677;GO:0008017	1;1	GO:0007067;GO:0045840;GO:0000226;GO:0051301;GO:0007076;GO:0000281;GO:0000070;GO:0040001;GO:0007049	1;1;1;1;1;1;1;1;1	chromosome;nucleus;spindle;spindle microtubule;cytoplasm;nucleolus;cytoskeleton;microtubule	1;1;1;1;1;1;1;1	microtubule binding;DNA binding	1;1	positive regulation of mitosis;cell division;microtubule cytoskeleton organization;mitosis;cell cycle;mitotic sister chromatid segregation;establishment of mitotic spindle localization;mitotic chromosome condensation;mitotic cytokinesis	1;1;1;1;1;1;1;1;1	Q9BXS6
5570	IPI:IPI00855998.1	Centromere protein F;Kinetochore protein CENP-F;Mitosin;AH antigen	CENPF	Centromere protein F	P49454	CENPF_HUMAN	1	50	50	50	18.4	18.4	367.76	3210	0	0.112793	1.47923	0	0.0730675	1.44586	6	0.997652	1.74779	0.222611	0.617791	FALSE	31.2021	0.00102557	0.0294218	TRUE	+				5570	;P49454(IPI00855998)	GO:0000922;GO:0005635;GO:0005737;GO:0030496;GO:0005829;GO:0000940;GO:0005819;GO:0000777;GO:0005856;GO:0005634;GO:0000785;GO:0005694;GO:0016363;GO:0000775;GO:0048471;GO:0000776;GO:0045120	1;1;1;1;1;1;1;1;1;1;1;1;1;1;1;1;1	GO:0045502;GO:0005515;GO:0003682;GO:0042803;GO:0008022;GO:0008134	1;1;1;1;1;1	GO:0007067;GO:0015031;GO:0000278;GO:0007059;GO:0007094;GO:0016202;GO:0007517;GO:0051301;GO:0006260;GO:0000085;GO:0051310;GO:0045892;GO:0042493;GO:0030154;GO:0010389;GO:0007275;GO:0000087;GO:0008283;GO:0051382;GO:0007049	1;1;1;1;1;1;1;1;1;1;1;1;1;1;1;1;1;1;1;1	nuclear matrix;chromatin;chromosome, centromeric region;midbody;chromosome;nucleus;pronucleus;kinetochore;spindle;nuclear envelope;condensed chromosome kinetochore;perinuclear region of cytoplasm;cytoplasm;cytosol;cytoskeleton;spindle pole;condensed chromosome outer kinetochore	1;1;1;1;1;1;1;1;1;1;1;1;1;1;1;1;1	protein C-terminus binding;protein homodimerization activity;chromatin binding;protein binding;dynein binding;transcription factor binding	1;1;1;1;1;1	cell differentiation;regulation of striated muscle tissue development;mitotic cell cycle;negative regulation of transcription, DNA-dependent;cell division;muscle organ development;response to drug;metaphase plate congression;mitotic spindle assembly checkpoint;cell proliferation;mitosis;protein transport;M phase of mitotic cell cycle;regulation of G2/M transition of mitotic cell cycle;cell cycle;…	1;1;1;1;1;1;1;1;1;1;1;1;1;1;1;1;1;1;1;1	P49454
5586	IPI:IPI00872292.1	Putative GTP-binding protein RAY-like;Rab-like protein 4	RABL4;RAYL	Isoform 1 of Putative GTP-binding protein RAY-like;Isoform 2 of Putative GTP-binding protein RAY-like	Q9BW83-1;Q9BW83;Q9BW83-2	RAYL_HUMAN	2	6	6	6	39.8	39.8	20.48	186	0	-0.00919919	0.139556	0	-0.02805	0.140899	6	0.998476	-0.503554	0.664563	0.873661	FALSE	14.5423	0.00469536	0.0374517	TRUE	+				5586	;Q9BW83(IPI00872292)	GO:0030992;GO:0031514	1;1	GO:0000166;GO:0005525	1;1	GO:0007264	1	motile cilium;intraflagellar transport particle B	1;1	GTP binding;nucleotide binding	1;1	small GTPase mediated signal transduction	1	Q9BW83
5591	IPI:IPI00872855.1	RNA-binding protein EWS;EWS oncogene;Ewing sarcoma breakpoint region 1 protein	EWSR1;EWS	Isoform EWS of RNA-binding protein EWS;Isoform EWS-B of RNA-binding protein EWS	Q01844-1;Q01844;Q01844-2	EWS_HUMAN	2	8	8	8	13.9	13.9	68.477	656	0	0.0313529	0.314363	0	0.0626495	0.298208	6	0.995893	1.74445	0.2232	0.617791	FALSE	11.0484	0.00809295	0.0448441	TRUE	+				5591	;Q01844(IPI00872855)	GO:0016020;GO:0005737;GO:0005886;GO:0005634	1;1;1;1	GO:0003723;GO:0005515;GO:0000166;GO:0008270;GO:0005516;GO:0003676;GO:0046872	1;1;1;1;1;1;1	GO:0006351;GO:0006355	1;1	nucleus;plasma membrane;cytoplasm;membrane	1;1;1;1	calmodulin binding;RNA binding;nucleotide binding;protein binding;zinc ion binding;metal ion binding;nucleic acid binding	1;1;1;1;1;1;1	transcription, DNA-dependent;regulation of transcription, DNA-dependent	1;1	Q01844
5653	IPI:IPI00916111.2	Malate dehydrogenase, cytoplasmic;Cytosolic malate dehydrogenase	MDH1;MDHA	Malate dehydrogenase	P40925	MDHC_HUMAN	1	14	14	14	42.6	42.6	38.655	352	0	0.0207779	0.140068	0	0.0429701	0.148688	6	0.99051	1.40452	0.295329	0.668407	FALSE	16.8469	0.00350488	0.0347039	TRUE	+				5653	;P40925(IPI00916111)	GO:0005737;GO:0005829;GO:0005739;GO:0005813	1;1;1;1	GO:0047860;GO:0016491;GO:0016616;GO:0051287;GO:0003824;GO:0016615;GO:0004470;GO:0030060	1;1;1;1;1;1;1;1	GO:0006006;GO:0006094;GO:0044262;GO:0055114;GO:0044281;GO:0006107;GO:0005975;GO:0019674;GO:0006734;GO:0006099;GO:0006108	1;1;1;1;1;1;1;1;1;1;1	mitochondrion;centrosome;cytoplasm;cytosol	1;1;1;1	oxidoreductase activity, acting on the CH-OH group of donors, NAD or NADP as acceptor;catalytic activity;diiodophenylpyruvate reductase activity;oxidoreductase activity;NAD binding;malic enzyme activity;L-malate dehydrogenase activity;malate dehydrogenase activity	1;1;1;1;1;1;1;1	oxidation-reduction process;glucose metabolic process;cellular carbohydrate metabolic process;gluconeogenesis;oxaloacetate metabolic process;small molecule metabolic process;NADH metabolic process;tricarboxylic acid cycle;NAD metabolic process;malate metabolic process;carbohydrate metabolic process	1;1;1;1;1;1;1;1;1;1;1	P40925
5669	IPI:IPI00926625.1	Zyxin;Zyxin-2	ZYX	Zyxin	Q15942	ZYX_HUMAN	1	8	8	8	24.3	24.3	61.277	572	0	0.0485243	0.637683	0	0.0409543	0.624184	6	0.997662	1.44341	0.285705	0.65852	FALSE	11.0177	0.00813752	0.0450088	TRUE	+				5669	;Q15942(IPI00926625)	GO:0030054;GO:0005737;GO:0005913;GO:0005887;GO:0005886;GO:0005856;GO:0005634;GO:0005925;GO:0001725	1;1;1;1;1;1;1;1;1	GO:0005515;GO:0008270;GO:0046872	1;1;1	GO:0007165;GO:0007155;GO:0007267;GO:0019048	1;1;1;1	stress fiber;cell junction;focal adhesion;nucleus;plasma membrane;integral to plasma membrane;cell-cell adherens junction;cytoplasm;cytoskeleton	1;1;1;1;1;1;1;1;1	protein binding;zinc ion binding;metal ion binding	1;1;1	cell-cell signaling;signal transduction;cell adhesion;modulation by virus of host morphology or physiology	1;1;1;1	Q15942
5690	IPI:IPI00940373.2;IPI:IPI00938352.2	RalBP1-associated Eps domain-containing protein 1;RalBP1-interacting protein 1	REPS1	Isoform 1 of RalBP1-associated Eps domain-containing protein 1;Isoform 3 of RalBP1-associated Eps domain-containing protein 1;Isoform 2 of RalBP1-associated Eps domain-containing protein 1	Q96D71-1;Q96D71;Q96D71-3;Q96D71-2	REPS1_HUMAN	3	12	12	11	19	19	86.661	796	0	0.0372068	0.322345	0	0.0900799	0.350631	6	0.99442	1.13955	0.372563	0.723393	FALSE	12.1422	0.00671448	0.0426658	TRUE	+				5690	;Q96D71(IPI00940373;IPI00938352)	GO:0016020;GO:0005886;GO:0005905	1;1;1	GO:0005515;GO:0017124;GO:0046872;GO:0005509	1;1;1;1	GO:0006898	1	plasma membrane;coated pit;membrane	1;1;1	protein binding;SH3 domain binding;calcium ion binding;metal ion binding	1;1;1;1	receptor-mediated endocytosis	1	Q96D71
5696	IPI:IPI00939442.1	Heat shock 70 kDa protein 1L;Heat shock 70 kDa protein 1-like;Heat shock 70 kDa protein 1-Hom;HSP70-Hom	HSPA1L	Heat shock 70 kDa protein 1L	P34931	HS71L_HUMAN	1	11	2	2	18.1	2.5	70.374	641	0	0.293549	1.33321	0	0.32421	1.35195	6	0.977805	5.57461	0.0307045	0.360445	FALSE	31.6299	0.000998055	0.0294218	TRUE	+				5696	;P34931(IPI00939442)	GO:0005759;GO:0008180;GO:0005739;GO:0002199	1;1;1;1	GO:0005524;GO:0000166	1;1	GO:0007339;GO:0006986	1;1	mitochondrion;mitochondrial matrix;zona pellucida receptor complex;COP9 signalosome	1;1;1;1	ATP binding;nucleotide binding	1;1	response to unfolded protein;binding of sperm to zona pellucida	1;1	P34931
5735	IPI:IPI00940959.1	ADP-ribosylation factor-like protein 8B;ADP-ribosylation factor-like protein 10C;Novel small G protein indispensable for equal chromosome segregation 1	ARL8B;ARL10C;GIE1	ADP-ribosylation factor-like protein 8B	Q9NVJ2	ARL8B_HUMAN	1	8	8	5	40.9	21.5	21.539	186	0	0.0680552	0.398277	0	0.0871054	0.39035	6	0.987161	2.12738	0.167221	0.569812	FALSE	10.4799	0.00898257	0.0472676	TRUE	+				5735	;Q9NVJ2(IPI00940959)	GO:0016020;GO:0051233;GO:0005737;GO:0030496;GO:0005819;GO:0005856;GO:0005765;GO:0031902;GO:0005622;GO:0005764;GO:0005768	1;1;1;1;1;1;1;1;1;1;1	GO:0048487;GO:0000166;GO:0043014;GO:0019003;GO:0003924;GO:0005525	1;1;1;1;1;1	GO:0006184;GO:0007059;GO:0007264;GO:0051301;GO:0007049	1;1;1;1;1	spindle midzone;late endosome membrane;midbody;lysosome;spindle;endosome;intracellular;lysosomal membrane;cytoplasm;cytoskeleton;membrane	1;1;1;1;1;1;1;1;1;1;1	GDP binding;GTP binding;GTPase activity;nucleotide binding;beta-tubulin binding;alpha-tubulin binding	1;1;1;1;1;1	cell division;GTP catabolic process;cell cycle;chromosome segregation;small GTPase mediated signal transduction	1;1;1;1;1	Q9NVJ2
5743	IPI:IPI00941167.1	Beta-hexosaminidase subunit alpha;N-acetyl-beta-glucosaminidase subunit alpha;Beta-N-acetylhexosaminidase subunit alpha	HEXA	Beta-hexosaminidase subunit alpha	P06865	HEXA_HUMAN	1	10	10	10	19.1	19.1	60.688	529	0	-0.0318423	0.354253	0	0.0139042	0.343873	6	0.997237	0.300735	0.792	0.922808	FALSE	11.6584	0.00727714	0.043741	TRUE	+				5743	No_Reviewed_Info
118	IPI:IPI00000684.4;IPI:IPI00607787.1;IPI:IPI00217816.3	UDP-N-acetylhexosamine pyrophosphorylase;Antigen X;Sperm-associated antigen 2;UDP-N-acetylgalactosamine pyrophosphorylase;AGX-1;UDP-N-acetylglucosamine pyrophosphorylase;AGX-2	UAP1;SPAG2	Isoform AGX2 of UDP-N-acetylhexosamine pyrophosphorylase;Isoform 3 of UDP-N-acetylhexosamine pyrophosphorylase;Isoform AGX1 of UDP-N-acetylhexosamine pyrophosphorylase	Q16222-1;Q16222;Q16222-3;Q16222-2	UAP1_HUMAN	3	14	14	13	28.7	26.2	58.768	522	0	-0.0446434	-0.250185	0	-0.0240105	-0.231771	7	0.985909	-1.16365	0.364618	0.718113	FALSE	-11.3759	0.00763894	0.0442336	TRUE	+				118	;Q16222(IPI00000684;IPI00607787;IPI00217816)	GO:0005737;GO:0005730;GO:0005829;GO:0005886;GO:0005634	1;1;1;1;1	GO:0003977;GO:0016779;GO:0030246;GO:0016740	1;1;1;1	GO:0043687;GO:0044267;GO:0008152;GO:0006047;GO:0006488;GO:0006048;GO:0018279	1;1;1;1;1;1;1	nucleus;plasma membrane;cytoplasm;cytosol;nucleolus	1;1;1;1;1	carbohydrate binding;UDP-N-acetylglucosamine diphosphorylase activity;transferase activity;nucleotidyltransferase activity	1;1;1;1	UDP-N-acetylglucosamine metabolic process;post-translational protein modification;protein N-linked glycosylation via asparagine;metabolic process;dolichol-linked oligosaccharide biosynthetic process;cellular protein metabolic process;UDP-N-acetylglucosamine biosynthetic process	1;1;1;1;1;1;1	Q16222
202	IPI:IPI00002255.5	Lipopolysaccharide-responsive and beige-like anchor protein;CDC4-like protein;Beige-like protein	LRBA;BGL;CDC4L;LBA	Isoform 1 of Lipopolysaccharide-responsive and beige-like anchor protein	P50851-1;P50851	LRBA_HUMAN	2	29	29	1	12.6	0.6	319.1	2863	0	-0.1181	-0.56613	0	-0.170199	-0.561645	7	0.980259	-2.53549	0.126664	0.529806	FALSE	-66.0586	0.000229083	0.0189578	TRUE	+				202	;P50851(IPI00002255)	GO:0016020;GO:0005783;GO:0016023;GO:0016021;GO:0005886;GO:0005575;GO:0005764;GO:0005794	1;1;1;1;1;1;1;1	GO:0003674	1	GO:0008150	1	integral to membrane;plasma membrane;lysosome;Golgi apparatus;endoplasmic reticulum;cytoplasmic membrane-bounded vesicle;cellular_component;membrane	1;1;1;1;1;1;1;1	molecular_function	1	biological_process	1	P50851
216	IPI:IPI00002411.3	NF-kappa-B essential modulator;NF-kappa-B essential modifier;Inhibitor of nuclear factor kappa-B kinase subunit gamma;IkB kinase-associated protein 1;FIP-3	IKBKG;FIP3;NEMO	NF-kappa-B essential modulator	Q9Y6K9	NEMO_HUMAN	1	9	9	9	27.7	27.7	48.197	419	0	0.0227326	-0.579131	0	0.00107924	-0.582147	7	0.999445	0.0193301	0.986333	0.993254	FALSE	-74.6731	0.000179289	0.0189578	TRUE	+				216	;Q9Y6K9(IPI00002411)	GO:0005737;GO:0008385;GO:0005829;GO:0005634;GO:0005622;GO:0044444	1;1;1;1;1;1	GO:0046982;GO:0005515;GO:0004871;GO:0046872;GO:0019904	1;1;1;1;1	GO:0032481;GO:0034134;GO:0035872;GO:0006917;GO:0070423;GO:0007250;GO:0034162;GO:0051092;GO:0006351;GO:0002224;GO:0007254;GO:0006954;GO:0002755;GO:0009615;GO:0034146;GO:0035666;GO:0038124;GO:0038123;GO:0045087;GO:0001782;GO:0051403;GO:0006355;GO:0002756;GO:0006974;GO:0034138;GO:0034142;GO:0000187;GO:0050852;GO:0043123;GO:0038095;GO:0007249;GO:0034166;GO:0006955;GO:0019048	1;1;1;1;1;1;1;1;1;1;1;1;1;1;1;1;1;1;1;1;1;1;1;1;1;1;1;1;1;1;1;1;1;1	cytoplasmic part;nucleus;intracellular;IkappaB kinase complex;cytoplasm;cytosol	1;1;1;1;1;1	protein heterodimerization activity;signal transducer activity;protein binding;protein domain specific binding;metal ion binding	1;1;1;1;1	inflammatory response;toll-like receptor 4 signaling pathway;Fc-epsilon receptor signaling pathway;activation of MAPK activity;positive regulation of type I interferon production;transcription, DNA-dependent;JNK cascade;positive regulation of I-kappaB kinase/NF-kappaB cascade;stress-activated MAPK cascade;toll-like receptor TLR6:TLR2 signaling pathway;toll-like receptor 3 signaling pathway;regula…	1;1;1;1;1;1;1;1;1;1;1;1;1;1;1;1;1;1;1;1;1;1;1;1;1;1;1;1;1;1;1;1;1;1	Q9Y6K9
248	IPI:IPI00002828.3	Centromere protein U;CENP-U(50);Interphase centromere complex protein 24;MLF1-interacting protein;KSHV latent nuclear antigen-interacting protein 1;Polo-box-interacting protein 1	MLF1IP;CENPU;ICEN24;KLIP1;PBIP1	Isoform 1 of Centromere protein U	Q71F23-1;Q71F23	CENPU_HUMAN	2	4	4	4	9.8	9.8	47.521	418	0	0.117298	-0.703158	0	0.122933	-0.743363	7	0.991226	17.7952	0.00314301	0.309054	FALSE	-16.495	0.00365516	0.0350595	TRUE	+				248	;Q71F23(IPI00002828)	GO:0005737;GO:0005829;GO:0000777;GO:0005634;GO:0005654;GO:0005813;GO:0005694;GO:0000775;GO:0000776	1;1;1;1;1;1;1;1;1			GO:0006334;GO:0000278;GO:0006351;GO:0034080;GO:0006355;GO:0019048	1;1;1;1;1;1	nucleoplasm;chromosome, centromeric region;chromosome;nucleus;kinetochore;centrosome;condensed chromosome kinetochore;cytoplasm;cytosol	1;1;1;1;1;1;1;1;1			mitotic cell cycle;CENP-A containing nucleosome assembly at centromere;transcription, DNA-dependent;regulation of transcription, DNA-dependent;nucleosome assembly;modulation by virus of host morphology or physiology	1;1;1;1;1;1	Q71F23
253	IPI:IPI00002894.2	DNA polymerase delta catalytic subunit;DNA polymerase subunit delta p125	POLD1;POLD	DNA polymerase delta catalytic subunit	P28340	DPOD1_HUMAN	1	34	34	34	38.3	38.3	123.63	1107	0	-0.167352	-0.864447	0	-0.204927	-0.874044	7	0.983204	-4.81185	0.0405786	0.378782	FALSE	-22.9951	0.00188582	0.0330512	TRUE	+				253	;P28340(IPI00002894)	GO:0005634;GO:0005654;GO:0043625;GO:0000109	1;1;1;1	GO:0003677;GO:0008408;GO:0016787;GO:0005515;GO:0000166;GO:0003682;GO:0051539;GO:0016779;GO:0051536;GO:0004518;GO:0003676;GO:0003887;GO:0004527;GO:0046872;GO:0016740	1;1;1;1;1;1;1;1;1;1;1;1;1;1;1	GO:0006289;GO:0000084;GO:0019985;GO:0000278;GO:0045004;GO:0044281;GO:0000722;GO:0006271;GO:0006287;GO:0006297;GO:0090305;GO:0032201;GO:0007346;GO:0006260;GO:0006283;GO:0000731;GO:0006139;GO:0006284;GO:0043137;GO:0006281;GO:0009411;GO:0000723	1;1;1;1;1;1;1;1;1;1;1;1;1;1;1;1;1;1;1;1;1;1	nucleoplasm;nucleotide-excision repair complex;nucleus;delta DNA polymerase complex	1;1;1;1	transferase activity;DNA binding;nuclease activity;DNA-directed DNA polymerase activity;hydrolase activity;4 iron, 4 sulfur cluster binding;3'-5' exonuclease activity;exonuclease activity;nucleotide binding;chromatin binding;protein binding;iron-sulfur cluster binding;metal ion binding;nucleic acid binding;nucleotidyltransferase activity	1;1;1;1;1;1;1;1;1;1;1;1;1;1;1	regulation of mitotic cell cycle;DNA replication proofreading;mitotic cell cycle;telomere maintenance;translesion synthesis;DNA synthesis involved in DNA repair;transcription-coupled nucleotide-excision repair;telomere maintenance via semi-conservative replication;small molecule metabolic process;nucleotide-excision repair, DNA gap filling;S phase of mitotic cell cycle;DNA replication, removal of…	1;1;1;1;1;1;1;1;1;1;1;1;1;1;1;1;1;1;1;1;1;1	P28340
275	IPI:IPI00003309.4	DNA-directed RNA polymerases I, II, and III subunit RPABC3;DNA-directed RNA polymerase II subunit H;DNA-directed RNA polymerases I, II, and III 17.1 kDa polypeptide;RPB17;hRPB8	POLR2H	DNA-directed RNA polymerases I, II, and III subunit RPABC3	P52434	RPAB3_HUMAN	1	6	6	6	41.3	41.3	17.143	150	0	0.00718071	-0.240061	0	-0.0467155	-0.246575	7	0.999674	-0.857078	0.481708	0.779888	FALSE	-27.0648	0.00136239	0.0305817	TRUE	+				275	;P52434(IPI00003309)	GO:0005665;GO:0005737;GO:0005730;GO:0005829;GO:0005634;GO:0005654	1;1;1;1;1;1	GO:0003677;GO:0008270;GO:0003899	1;1;1	GO:0006385;GO:0032481;GO:0006361;GO:0006360;GO:0006289;GO:0006363;GO:0006386;GO:0050434;GO:0006351;GO:0006283;GO:0006362;GO:0045087;GO:0000398;GO:0016032;GO:0008380;GO:0006367;GO:0006370;GO:0006368;GO:0006281;GO:0006366;GO:0010467;GO:0006383	1;1;1;1;1;1;1;1;1;1;1;1;1;1;1;1;1;1;1;1;1;1	nucleoplasm;nucleus;DNA-directed RNA polymerase II, core complex;cytoplasm;cytosol;nucleolus	1;1;1;1;1;1	DNA binding;DNA-directed RNA polymerase activity;zinc ion binding	1;1;1	termination of RNA polymerase III transcription;transcription from RNA polymerase I promoter;transcription elongation from RNA polymerase III promoter;positive regulation of type I interferon production;transcription from RNA polymerase II promoter;viral process;transcription-coupled nucleotide-excision repair;transcription, DNA-dependent;7-methylguanosine mRNA capping;transcription initiation fr…	1;1;1;1;1;1;1;1;1;1;1;1;1;1;1;1;1;1;1;1;1;1	P52434
292	IPI:IPI00003443.3;IPI:IPI00217475.2	Gamma-interferon-inducible protein Ifi-16;Interferon-inducible myeloid differentiation transcriptional activator;IFI 16	IFI16;IFNGIP1	Isoform 1 of Gamma-interferon-inducible protein Ifi-16;Isoform 3 of Gamma-interferon-inducible protein Ifi-16;Gamma-interferon-inducible protein Ifi-16;Isoform 4 of Gamma-interferon-inducible protein Ifi-16	Q16666-1;Q16666;Q16666-3;Q16666-2;Q16666-5	IF16_HUMAN	13	36	36	36	43.9	43.9	88.255	785	0	-0.0413637	-0.309072	0	-0.0913746	-0.320986	7	0.992374	-1.59753	0.25124	0.636132	FALSE	-10.7386	0.0085605	0.0459237	TRUE	+				292	;Q16666(IPI00003443;IPI00217475)	GO:0005737;GO:0005730;GO:0005829;GO:0005634;GO:0005654;GO:0016607	1;1;1;1;1;1	GO:0003677;GO:0003690;GO:0005515;GO:0008134	1;1;1;1	GO:0032481;GO:0006914;GO:0006915;GO:0043392;GO:0045944;GO:0071479;GO:0072332;GO:0097202;GO:0000122;GO:0010506;GO:0051607;GO:0006351;GO:0006954;GO:0009615;GO:0002218;GO:0001819;GO:0045087;GO:0045892;GO:0032731;GO:0042771;GO:2000117;GO:0006355;GO:0030099;GO:0042149;GO:0008283;GO:0045071;GO:0030097;GO:0045824;GO:0030224	1;1;1;1;1;1;1;1;1;1;1;1;1;1;1;1;1;1;1;1;1;1;1;1;1;1;1;1;1	nucleoplasm;nuclear speck;nucleus;cytoplasm;cytosol;nucleolus	1;1;1;1;1;1	DNA binding;protein binding;double-stranded DNA binding;transcription factor binding	1;1;1;1	inflammatory response;negative regulation of transcription, DNA-dependent;myeloid cell differentiation;positive regulation of type I interferon production;intrinsic apoptotic signaling pathway by p53 class mediator;hemopoiesis;positive regulation of interleukin-1 beta production;transcription, DNA-dependent;negative regulation of innate immune response;autophagy;cellular response to ionizing radi…	1;1;1;1;1;1;1;1;1;1;1;1;1;1;1;1;1;1;1;1;1;1;1;1;1;1;1;1;1	Q16666
296	IPI:IPI00003505.3	Thyroid receptor-interacting protein 13;Thyroid hormone receptor interactor 13;Human papillomavirus type 16 E1 protein-binding protein	TRIP13	Isoform 1 of Thyroid receptor-interacting protein 13	Q15645-1;Q15645	TRP13_HUMAN	2	18	18	18	46.8	46.8	48.55	432	0	-0.0488437	-0.32778	0	-0.0463014	-0.316574	7	0.990418	-2.46657	0.132477	0.537136	FALSE	-19.1099	0.00272711	0.0347039	TRUE	+				296	;Q15645(IPI00003505)	GO:0005634;GO:0001673	1;1	GO:0005524;GO:0005515;GO:0000166;GO:0003712;GO:0017111;GO:0042802	1;1;1;1;1;1	GO:0007144;GO:0007131;GO:0007286;GO:0007141;GO:0048477;GO:0007130;GO:0006302;GO:0030154;GO:0001556;GO:0007283;GO:0006366;GO:0007126	1;1;1;1;1;1;1;1;1;1;1;1	nucleus;male germ cell nucleus	1;1	ATP binding;identical protein binding;transcription cofactor activity;nucleoside-triphosphatase activity;nucleotide binding;protein binding	1;1;1;1;1;1	cell differentiation;reciprocal meiotic recombination;transcription from RNA polymerase II promoter;oogenesis;double-strand break repair;synaptonemal complex assembly;spermatogenesis;female meiosis I;meiosis;spermatid development;male meiosis I;oocyte maturation	1;1;1;1;1;1;1;1;1;1;1;1	Q15645
310	IPI:IPI00003783.1	Dual specificity mitogen-activated protein kinase kinase 2;ERK activator kinase 2;MAPK/ERK kinase 2	MAP2K2;MEK2;MKK2;PRKMK2	Dual specificity mitogen-activated protein kinase kinase 2	P36507	MP2K2_HUMAN	1	26	26	17	66.2	48	44.424	400	0	-0.074137	-0.312042	0	-0.066603	-0.324389	7	0.973807	-1.38287	0.300862	0.672862	FALSE	-17.9761	0.00308035	0.0347039	TRUE	+				310	;P36507(IPI00003783)	GO:0005783;GO:0005938;GO:0005770;GO:0005874;GO:0005911;GO:0005829;GO:0009898;GO:0005576;GO:0005739;GO:0005769;GO:0005778;GO:0005634;GO:0005925;GO:0048471;GO:0005794	1;1;1;1;1;1;1;1;1;1;1;1;1;1;1	GO:0005524;GO:0043539;GO:0097110;GO:0004713;GO:0005515;GO:0000166;GO:0004672;GO:0030165;GO:0004712;GO:0032947;GO:0016301;GO:0004674;GO:0004708;GO:0016740;GO:0016772	1;1;1;1;1;1;1;1;1;1;1;1;1;1;1	GO:0032872;GO:0008286;GO:0048011;GO:0034134;GO:0008543;GO:0000186;GO:0090170;GO:0034162;GO:0007264;GO:0000165;GO:0002224;GO:0002755;GO:0007265;GO:0034146;GO:0016310;GO:0035666;GO:0038124;GO:0070371;GO:0038123;GO:0071902;GO:0007173;GO:2000147;GO:0007411;GO:0045087;GO:0006468;GO:2000641;GO:0051403;GO:0036289;GO:0002756;GO:0034138;GO:0034142;GO:0000187;GO:0038095;GO:0034166	1;1;1;1;1;1;1;1;1;1;1;1;1;1;1;1;1;1;1;1;1;1;1;1;1;1;1;1;1;1;1;1;1;1	mitochondrion;late endosome;cell cortex;peroxisomal membrane;focal adhesion;nucleus;Golgi apparatus;endoplasmic reticulum;internal side of plasma membrane;perinuclear region of cytoplasm;early endosome;cell-cell junction;cytosol;extracellular region;microtubule	1;1;1;1;1;1;1;1;1;1;1;1;1;1;1	PDZ domain binding;protein complex scaffold;protein tyrosine kinase activity;transferase activity;transferase activity, transferring phosphorus-containing groups;ATP binding;protein serine/threonine/tyrosine kinase activity;protein serine/threonine kinase activator activity;scaffold protein binding;protein serine/threonine kinase activity;protein kinase activity;nucleotide binding;protein binding…	1;1;1;1;1;1;1;1;1;1;1;1;1;1;1	toll-like receptor 4 signaling pathway;peptidyl-serine autophosphorylation;Ras protein signal transduction;Fc-epsilon receptor signaling pathway;activation of MAPK activity;neurotrophin TRK receptor signaling pathway;stress-activated MAPK cascade;toll-like receptor TLR6:TLR2 signaling pathway;regulation of Golgi inheritance;activation of MAPKK activity;toll-like receptor 3 signaling pathway;prote…	1;1;1;1;1;1;1;1;1;1;1;1;1;1;1;1;1;1;1;1;1;1;1;1;1;1;1;1;1;1;1;1;1;1	P36507
395	IPI:IPI00004970.4	Small subunit processome component 20 homolog;Down-regulated in metastasis protein;Protein Key-1A6;Novel nucleolar protein 73	UTP20;DRIM	Small subunit processome component 20 homolog	O75691	UTP20_HUMAN	1	35	35	35	14.2	14.2	318.4	2785	0	-0.0764399	-0.421387	0	-0.0746541	-0.417673	7	0.985402	-1.66342	0.238129	0.62479	FALSE	-16.1778	0.00379909	0.0354309	TRUE	+				395	;O75691(IPI00004970)	GO:0005737;GO:0005730;GO:0030688;GO:0030686;GO:0005654;GO:0005634;GO:0032040	1;1;1;1;1;1;1	GO:0005515	1	GO:0000480;GO:0008285;GO:0006364;GO:0000472;GO:0000447	1;1;1;1;1	nucleoplasm;nucleus;90S preribosome;cytoplasm;small-subunit processome;preribosome, small subunit precursor;nucleolus	1;1;1;1;1;1;1	protein binding	1	negative regulation of cell proliferation;endonucleolytic cleavage in 5'-ETS of tricistronic rRNA transcript (SSU-rRNA, 5.8S rRNA, LSU-rRNA);endonucleolytic cleavage to generate mature 5'-end of SSU-rRNA from (SSU-rRNA, 5.8S rRNA, LSU-rRNA);rRNA processing;endonucleolytic cleavage in ITS1 to separate SSU-rRNA from 5.8S rRNA and LSU-rRNA from tricistronic rRNA transcript (SSU-rRNA, 5.8S rRNA, LSU-…	1;1;1;1;1	O75691
404	IPI:IPI00005045.1	ATP-binding cassette sub-family F member 2;Iron-inhibited ABC transporter 2	ABCF2;HUSSY-18	ATP-binding cassette sub-family F member 2	Q9UG63	ABCF2_HUMAN	1	23	23	23	34.5	34.5	71.289	623	0	-0.161419	-0.654476	0	-0.165407	-0.637765	7	0.971579	-8.58195	0.0133073	0.316271	FALSE	-32.7694	0.000929941	0.0291412	TRUE	+				404	;Q9UG63(IPI00005045)	GO:0005740;GO:0043190	1;1	GO:0005524;GO:0000166;GO:0017111;GO:0016887;GO:0005215	1;1;1;1;1	GO:0006810;GO:0006200	1;1	ATP-binding cassette (ABC) transporter complex;mitochondrial envelope	1;1	transporter activity;ATP binding;ATPase activity;nucleoside-triphosphatase activity;nucleotide binding	1;1;1;1;1	transport;ATP catabolic process	1;1	Q9UG63
459	IPI:IPI00005658.3	Ubiquitin-like protein 4A;Ubiquitin-like protein GDX	UBL4A;DXS254E;GDX;UBL4	Ubiquitin-like protein 4A	P11441	UBL4A_HUMAN	1	6	6	6	43.3	43.3	17.776	157	0	0.011583	-0.179453	0	-0.0682956	-0.175726	7	0.998537	-0.747953	0.532478	0.803616	FALSE	-28.3872	0.00123864	0.03031	TRUE	+				459	;P11441(IPI00005658)	GO:0005737;GO:0005829;GO:0071818	1;1;1	GO:0019787;GO:0005515	1;1	GO:0006810;GO:0006464;GO:0071816	1;1;1	BAT3 complex;cytoplasm;cytosol	1;1;1	small conjugating protein ligase activity;protein binding	1;1	transport;tail-anchored membrane protein insertion into ER membrane;cellular protein modification process	1;1;1	P11441
464	IPI:IPI00005675.3	NF-kappa-B-repressing factor;Transcription factor NRF;ITBA4 protein	NKRF;ITBA4;NRF	NF-kappa-B-repressing factor	O15226	NKRF_HUMAN	1	10	10	10	17.2	17.2	77.672	690	0	-0.0371029	-0.222939	0	-0.0202202	-0.217163	7	0.987867	-0.486232	0.674863	0.878327	FALSE	-10.4562	0.00902282	0.0473354	TRUE	+				464	;O15226(IPI00005675)	GO:0005730;GO:0005634	1;1	GO:0003677;GO:0005515;GO:0003676	1;1;1	GO:0006351;GO:0045892;GO:0006355	1;1;1	nucleus;nucleolus	1;1	DNA binding;protein binding;nucleic acid binding	1;1;1	negative regulation of transcription, DNA-dependent;transcription, DNA-dependent;regulation of transcription, DNA-dependent	1;1;1	O15226
512	IPI:IPI00006099.1	Ribosome biogenesis protein BMS1 homolog;Ribosome assembly protein BMS1 homolog	BMS1;BMS1L;KIAA0187	Ribosome biogenesis protein BMS1 homolog	Q14692	BMS1_HUMAN	3	17	17	17	14.6	14.6	145.81	1282	0	-0.045339	-0.414021	0	-0.0408043	-0.42665	7	0.995005	-3.16039	0.0872199	0.472706	FALSE	-17.1001	0.00340237	0.0347039	TRUE	+				512	;Q14692(IPI00006099)	GO:0005730;GO:0005634	1;1	GO:0005524;GO:0000166	1;1	GO:0042254;GO:0042255	1;1	nucleus;nucleolus	1;1	ATP binding;nucleotide binding	1;1	ribosome biogenesis;ribosome assembly	1;1	Q14692
794	IPI:IPI00009471.1	WD repeat-containing protein 3	WDR3	WD repeat-containing protein 3	Q9UNX4	WDR3_HUMAN	1	22	22	22	26.9	26.9	106.1	943	0	-0.154999	-0.733347	0	-0.178071	-0.714707	7	0.979691	-4.44869	0.0469952	0.395643	FALSE	-22.0007	0.0020596	0.0330512	TRUE	+				794	;Q9UNX4(IPI00009471)	GO:0005730;GO:0031965;GO:0005634	1;1;1					nucleus;nuclear membrane;nucleolus	1;1;1					Q9UNX4
804	IPI:IPI00009646.1	B-cell lymphoma/leukemia 11B;B-cell CLL/lymphoma 11B;Radiation-induced tumor suppressor gene 1 protein;COUP-TF-interacting protein 2	BCL11B;CTIP2;RIT1	Isoform 2 of B-cell lymphoma/leukemia 11B;Isoform 1 of B-cell lymphoma/leukemia 11B	Q9C0K0-2;Q9C0K0;Q9C0K0-1	BC11B_HUMAN	4	17	17	17	31.7	31.7	88.475	823	0	-0.0436065	-0.534702	0	-0.0924105	-0.512622	7	0.9973	-0.94108	0.446005	0.763918	FALSE	-15.4795	0.00414744	0.0362273	TRUE	+				804	;Q9C0K0(IPI00009646)	GO:0005634;GO:0005622	1;1	GO:0001077;GO:0043565;GO:0000978;GO:0003676;GO:0046872	1;1;1;1;1	GO:0010837;GO:0019216;GO:0008285;GO:0042475;GO:0045944;GO:0010468;GO:0043588;GO:0033077;GO:0046632;GO:0045664;GO:0006351;GO:0043368;GO:0071678;GO:0003334;GO:0009791;GO:0021953;GO:0043066;GO:0007409;GO:0033153;GO:0021773;GO:0006355;GO:0003382;GO:0048538;GO:0031077	1;1;1;1;1;1;1;1;1;1;1;1;1;1;1;1;1;1;1;1;1;1;1;1	nucleus;intracellular	1;1	RNA polymerase II core promoter proximal region sequence-specific DNA binding;sequence-specific DNA binding;RNA polymerase II core promoter proximal region sequence-specific DNA binding transcription factor activity involved in positive regulation of transcription;metal ion binding;nucleic acid binding	1;1;1;1;1	negative regulation of cell proliferation;T cell receptor V(D)J recombination;T cell differentiation in thymus;striatal medium spiny neuron differentiation;epithelial cell morphogenesis;post-embryonic development;keratinocyte development;odontogenesis of dentin-containing tooth;transcription, DNA-dependent;positive T cell selection;regulation of lipid metabolic process;positive regulation of tran…	1;1;1;1;1;1;1;1;1;1;1;1;1;1;1;1;1;1;1;1;1;1;1;1	Q9C0K0
821	IPI:IPI00009803.1	Integrin alpha-4;Integrin alpha-IV;VLA-4;CD49 antigen-like family member D	ITGA4;CD49D	Integrin alpha-4 precursor	P13612	ITA4_HUMAN	1	19	19	19	20.4	20.4	115.33	1038	0	-0.106787	-0.650845	0	-0.188658	-0.631116	7	0.988231	-1.90286	0.19739	0.597601	FALSE	-18.7326	0.0028376	0.0347039	TRUE	+				821	;P13612(IPI00009803)	GO:0016020;GO:0009897;GO:0008305;GO:0016021;GO:0005886;GO:0070062;GO:0009986	1;1;1;1;1;1;1	GO:0001968;GO:0005515;GO:0046872	1;1;1	GO:0007596;GO:0007507;GO:0007157;GO:0007155;GO:0007229;GO:0030183;GO:0050776;GO:0050900;GO:0016477;GO:0007159;GO:0060324;GO:0001974;GO:0060710	1;1;1;1;1;1;1;1;1;1;1;1;1	integral to membrane;plasma membrane;integrin complex;external side of plasma membrane;extracellular vesicular exosome;cell surface;membrane	1;1;1;1;1;1;1	fibronectin binding;protein binding;metal ion binding	1;1;1	face development;regulation of immune response;cell migration;heterophilic cell-cell adhesion;chorio-allantoic fusion;blood vessel remodeling;cell adhesion;leukocyte migration;leukocyte cell-cell adhesion;B cell differentiation;integrin-mediated signaling pathway;heart development;blood coagulation	1;1;1;1;1;1;1;1;1;1;1;1;1	P13612
850	IPI:IPI00010133.3	Coronin-1A;Coronin-like protein p57;Coronin-like protein A;Tryptophan aspartate-containing coat protein	CORO1A;CORO1	Coronin-1A	P31146	COR1A_HUMAN	1	28	28	28	53.1	53.1	51.026	461	0	-0.0841141	-0.373492	0	-0.079302	-0.354061	7	0.976688	-2.13055	0.166841	0.569812	FALSE	-11.9785	0.00689739	0.0431561	TRUE	+				850	;P31146(IPI00010133)	GO:0016020;GO:0031252;GO:0005938;GO:0031410;GO:0005737;GO:0045335;GO:0030864;GO:0015629;GO:0005886;GO:0005856;GO:0005634;GO:0030670;GO:0030027;GO:0001772;GO:0001891;GO:0005884;GO:0043234	1;1;1;1;1;1;1;1;1;1;1;1;1;1;1;1;1	GO:0051015;GO:0005515;GO:0043548;GO:0042802;GO:0008092;GO:0042803;GO:0003779;GO:0008022	1;1;1;1;1;1;1;1	GO:0030833;GO:0030335;GO:0001845;GO:0006909;GO:0030036;GO:0008360;GO:0043029;GO:0032796;GO:0034097;GO:0048873;GO:0071353;GO:0016477;GO:0042102;GO:0007015;GO:0045087;GO:0006816;GO:0050918;GO:0051126;GO:0008064;GO:0030595;GO:0031589;GO:0050870;GO:0006928	1;1;1;1;1;1;1;1;1;1;1;1;1;1;1;1;1;1;1;1;1;1;1	cell cortex;nucleus;plasma membrane;phagocytic cup;phagocytic vesicle membrane;cell leading edge;cortical actin cytoskeleton;protein complex;actin cytoskeleton;immunological synapse;phagocytic vesicle;cytoplasm;cytoplasmic vesicle;actin filament;cytoskeleton;lamellipodium;membrane	1;1;1;1;1;1;1;1;1;1;1;1;1;1;1;1;1	cytoskeletal protein binding;protein C-terminus binding;protein homodimerization activity;identical protein binding;phosphatidylinositol 3-kinase binding;actin binding;protein binding;actin filament binding	1;1;1;1;1;1;1;1	cellular response to interleukin-4;phagolysosome assembly;actin filament organization;cell migration;positive chemotaxis;homeostasis of number of cells within a tissue;response to cytokine stimulus;actin cytoskeleton organization;regulation of actin polymerization or depolymerization;positive regulation of T cell activation;innate immune response;regulation of actin filament polymerization;uropod…	1;1;1;1;1;1;1;1;1;1;1;1;1;1;1;1;1;1;1;1;1;1;1	P31146
856	IPI:IPI00010157.1	S-adenosylmethionine synthetase isoform type-2;Methionine adenosyltransferase 2;Methionine adenosyltransferase II	MAT2A;AMS2;MATA2	S-adenosylmethionine synthetase isoform type-2	P31153	METK2_HUMAN	2	19	19	19	49.9	49.9	43.66	395	0	-0.0529563	-0.276598	0	-0.0674695	-0.291213	7	0.983602	-1.91842	0.195073	0.596891	FALSE	-19.6875	0.00257006	0.0344775	TRUE	+				856	;P31153(IPI00010157)	GO:0005829	1	GO:0005524;GO:0000166;GO:0004478;GO:0046872;GO:0016740	1;1;1;1;1	GO:0000096;GO:0032259;GO:0044281;GO:0006556;GO:0006805;GO:0006730;GO:0034641	1;1;1;1;1;1;1	cytosol	1	transferase activity;ATP binding;methionine adenosyltransferase activity;nucleotide binding;metal ion binding	1;1;1;1;1	sulfur amino acid metabolic process;small molecule metabolic process;one-carbon metabolic process;S-adenosylmethionine biosynthetic process;xenobiotic metabolic process;cellular nitrogen compound metabolic process;methylation	1;1;1;1;1;1;1	P31153
879	IPI:IPI00010346.1	Neurolysin, mitochondrial;Neurotensin endopeptidase;Mitochondrial oligopeptidase M;Microsomal endopeptidase;Angiotensin-binding protein	NLN;AGTBP;KIAA1226	Neurolysin, mitochondrial	Q9BYT8	NEUL_HUMAN	1	15	15	15	25.7	25.7	80.651	704	0	0.00692935	-0.307613	0	-0.0312267	-0.282995	7	0.999814	-0.433301	0.707052	0.893319	FALSE	-11.1152	0.00799709	0.0445522	TRUE	+				879	;Q9BYT8(IPI00010346)	GO:0005737;GO:0005739;GO:0005758	1;1;1	GO:0008233;GO:0004222;GO:0008237;GO:0016787;GO:0046872	1;1;1;1;1	GO:0006508	1	mitochondrion;mitochondrial intermembrane space;cytoplasm	1;1;1	metallopeptidase activity;peptidase activity;metalloendopeptidase activity;hydrolase activity;metal ion binding	1;1;1;1;1	proteolysis	1	Q9BYT8
899	IPI:IPI00010590.2;IPI:IPI00807455.1;IPI:IPI00807597.1	Lymphoid-specific helicase;SWI/SNF2-related matrix-associated actin-dependent regulator of chromatin subfamily A member 6;Proliferation-associated SNF2-like protein	HELLS;PASG;SMARCA6;Nbla10143	Isoform 1 of Lymphoid-specific helicase;Isoform 2 of Lymphoid-specific helicase;Isoform 4 of Lymphoid-specific helicase;Isoform 3 of Lymphoid-specific helicase;Isoform 5 of Lymphoid-specific helicase;Isoform 6 of Lymphoid-specific helicase	Q9NRZ9-1;Q9NRZ9;Q9NRZ9-2;Q9NRZ9-4;Q9NRZ9-3;Q9NRZ9-5;Q9NRZ9-6	HELLS_HUMAN	9	20	20	19	24.3	23.6	97.073	838	0	-0.0846629	-0.835475	0	-0.159145	-0.869617	7	0.995754	-1.25535	0.336148	0.692344	FALSE	-20.053	0.00247756	0.0338265	TRUE	+				899	;Q9NRZ9(IPI00807455;IPI00010590;IPI00807597)	GO:0005634;GO:0000775;GO:0005721	1;1;1	GO:0003677;GO:0005524;GO:0004386;GO:0016787;GO:0000166;GO:0003682;GO:0003676	1;1;1;1;1;1;1	GO:0007067;GO:0006346;GO:0001655;GO:0006351;GO:0006306;GO:0051301;GO:0010216;GO:0046651;GO:0006342;GO:0043066;GO:0007275;GO:0006355;GO:0031508;GO:0007049	1;1;1;1;1;1;1;1;1;1;1;1;1;1	chromosome, centromeric region;nucleus;centromeric heterochromatin	1;1;1	DNA binding;ATP binding;hydrolase activity;helicase activity;nucleotide binding;chromatin binding;nucleic acid binding	1;1;1;1;1;1;1	maintenance of DNA methylation;cell division;lymphocyte proliferation;transcription, DNA-dependent;centromeric heterochromatin assembly;methylation-dependent chromatin silencing;regulation of transcription, DNA-dependent;mitosis;negative regulation of apoptotic process;cell cycle;urogenital system development;DNA methylation;multicellular organismal development;chromatin silencing	1;1;1;1;1;1;1;1;1;1;1;1;1;1	Q9NRZ9
937	IPI:IPI00011253.3	40S ribosomal protein S3	RPS3;OK/SW-cl.26	40S ribosomal protein S3	P23396	RS3_HUMAN	1	27	27	27	78.6	78.6	26.688	243	0	-0.00440983	-0.0965464	0	-0.0126209	-0.0975921	7	0.999182	-0.788133	0.513197	0.792798	FALSE	-81.9624	0.000148824	0.0189578	TRUE	+				937	;P23396(IPI00011253)	GO:0005840;GO:0032587;GO:0015935;GO:0005737;GO:0005829;GO:0005634;GO:0005622;GO:0030529;GO:0022627	1;1;1;1;1;1;1;1;1	GO:0003723;GO:0051018;GO:0019901;GO:0005515;GO:0003735;GO:0003729;GO:0003906;GO:0051536;GO:0051059;GO:0003684;GO:0004519	1;1;1;1;1;1;1;1;1;1;1	GO:1900119;GO:0032088;GO:0000184;GO:0006413;GO:0006412;GO:0006919;GO:0016070;GO:0045738;GO:0006415;GO:0019083;GO:0016071;GO:0019058;GO:0044267;GO:0016032;GO:0006614;GO:0006414;GO:0006974;GO:0010467	1;1;1;1;1;1;1;1;1;1;1;1;1;1;1;1;1;1	small ribosomal subunit;ribosome;ruffle membrane;nucleus;ribonucleoprotein complex;intracellular;cytoplasm;cytosol;cytosolic small ribosomal subunit	1;1;1;1;1;1;1;1;1	damaged DNA binding;structural constituent of ribosome;protein kinase binding;mRNA binding;RNA binding;DNA-(apurinic or apyrimidinic site) lyase activity;NF-kappaB binding;protein binding;protein kinase A binding;iron-sulfur cluster binding;endonuclease activity	1;1;1;1;1;1;1;1;1;1;1	viral infectious cycle;viral transcription;viral process;translational termination;RNA metabolic process;translational elongation;response to DNA damage stimulus;cellular protein metabolic process;translational initiation;negative regulation of NF-kappaB transcription factor activity;activation of cysteine-type endopeptidase activity involved in apoptotic process;mRNA metabolic process;nuclear-tr…	1;1;1;1;1;1;1;1;1;1;1;1;1;1;1;1;1;1	P23396
987	IPI:IPI00012007.6	Adenosylhomocysteinase;S-adenosyl-L-homocysteine hydrolase	AHCY;SAHH	Adenosylhomocysteinase	P23526	SAHH_HUMAN	1	30	30	30	52.8	52.8	47.716	432	0	-0.0100347	-0.0717992	0	-0.01475	-0.0760661	7	0.991639	-0.433089	0.707183	0.893319	FALSE	-16.6595	0.00358375	0.0347039	TRUE	+				987	;P23526(IPI00012007)	GO:0042470;GO:0005737;GO:0005829;GO:0005634;GO:0043005	1;1;1;1;1	GO:0016787;GO:0004013;GO:0042802;GO:0051287;GO:0030554	1;1;1;1;1	GO:0032259;GO:0000096;GO:0044281;GO:0006730;GO:0006805;GO:0001666;GO:0034641;GO:0042745;GO:0007584;GO:0002439;GO:0019510	1;1;1;1;1;1;1;1;1;1;1	neuron projection;nucleus;melanosome;cytoplasm;cytosol	1;1;1;1;1	NAD binding;identical protein binding;hydrolase activity;adenosylhomocysteinase activity;adenyl nucleotide binding	1;1;1;1;1	circadian sleep/wake cycle;S-adenosylhomocysteine catabolic process;chronic inflammatory response to antigenic stimulus;sulfur amino acid metabolic process;small molecule metabolic process;one-carbon metabolic process;xenobiotic metabolic process;cellular nitrogen compound metabolic process;methylation;response to nutrient;response to hypoxia	1;1;1;1;1;1;1;1;1;1;1	P23526
995	IPI:IPI00012149.1	U3 small nucleolar ribonucleoprotein protein MPP10;M phase phosphoprotein 10	MPHOSPH10;MPP10	U3 small nucleolar ribonucleoprotein protein MPP10	O00566	MPP10_HUMAN	1	7	7	7	13.2	13.2	78.863	681	0	-0.0086851	-0.172221	0	0.0593492	-0.168891	7	0.998998	0.69994	0.556423	0.820953	FALSE	-10.1793	0.00951325	0.0486251	TRUE	+				995	;O00566(IPI00012149)	GO:0005730;GO:0005634;GO:0005732;GO:0005694;GO:0030529	1;1;1;1;1	GO:0005515	1	GO:0010923;GO:0006364;GO:0006396;GO:0042254;GO:0000375;GO:0008380	1;1;1;1;1;1	chromosome;small nucleolar ribonucleoprotein complex;nucleus;ribonucleoprotein complex;nucleolus	1;1;1;1;1	protein binding	1	ribosome biogenesis;RNA splicing, via transesterification reactions;RNA splicing;negative regulation of phosphatase activity;rRNA processing;RNA processing	1;1;1;1;1;1	O00566
1079	IPI:IPI00013212.1	Tyrosine-protein kinase CSK;C-SRC kinase;Protein-tyrosine kinase CYL	CSK	Tyrosine-protein kinase CSK	P41240	CSK_HUMAN	2	27	27	27	61.3	61.3	50.704	450	0	-0.0722555	-0.364039	0	-0.0878488	-0.376136	7	0.982275	-3.48308	0.0734605	0.438653	FALSE	-17.409	0.0032833	0.0347039	TRUE	+				1079	;P41240(IPI00013212)	GO:0016020;GO:0043231;GO:0005813;GO:0005737;GO:0045121;GO:0005911;GO:0005829;GO:0005794;GO:0005886	1;1;1;1;1;1;1;1;1	GO:0004715;GO:0005524;GO:0016301;GO:0019903;GO:0004713;GO:0008022;GO:0005515;GO:0004672;GO:0000166;GO:0016740;GO:0070064;GO:0016772	1;1;1;1;1;1;1;1;1;1;1;1	GO:0016310;GO:0007596;GO:0032715;GO:0007420;GO:0045779;GO:0007173;GO:0050765;GO:0008285;GO:0048709;GO:0006468;GO:0033673;GO:0071375;GO:0046777;GO:0070373;GO:0034332;GO:0030168;GO:0031295;GO:0010989;GO:0043406;GO:0050852;GO:0042997;GO:0060368	1;1;1;1;1;1;1;1;1;1;1;1;1;1;1;1;1;1;1;1;1;1	intracellular membrane-bounded organelle;membrane raft;Golgi apparatus;centrosome;cytoplasm;cell-cell junction;cytosol;plasma membrane;membrane	1;1;1;1;1;1;1;1;1	protein phosphatase binding;non-membrane spanning protein tyrosine kinase activity;proline-rich region binding;protein tyrosine kinase activity;transferase activity;protein kinase activity;transferase activity, transferring phosphorus-containing groups;nucleotide binding;ATP binding;protein binding;protein C-terminus binding;kinase activity	1;1;1;1;1;1;1;1;1;1;1;1	positive regulation of MAP kinase activity;negative regulation of cell proliferation;negative regulation of Golgi to plasma membrane protein transport;negative regulation of kinase activity;negative regulation of bone resorption;platelet activation;epidermal growth factor receptor signaling pathway;oligodendrocyte differentiation;negative regulation of interleukin-6 production;negative regulation…	1;1;1;1;1;1;1;1;1;1;1;1;1;1;1;1;1;1;1;1;1;1	P41240
1109	IPI:IPI00013485.3	40S ribosomal protein S2;S4;LLRep3 protein	RPS2;RPS4	40S ribosomal protein S2	P15880	RS2_HUMAN	1	14	14	14	48.8	48.8	31.324	293	0	0.0390233	-0.126218	0	0.031144	-0.121953	7	0.974149	1.87496	0.201637	0.600664	FALSE	-21.3135	0.00219412	0.0330512	TRUE	+				1109	;P15880(IPI00013485)	GO:0005840;GO:0015935;GO:0005730;GO:0005829;GO:0005654;GO:0030529;GO:0022627	1;1;1;1;1;1;1	GO:0003723;GO:0005515;GO:0017134;GO:0003735	1;1;1;1	GO:0019058;GO:0044267;GO:0000184;GO:0016032;GO:0006413;GO:0006614;GO:0006412;GO:0006414;GO:0016070;GO:0006415;GO:0010467;GO:0019083;GO:0016071	1;1;1;1;1;1;1;1;1;1;1;1;1	nucleoplasm;small ribosomal subunit;ribosome;ribonucleoprotein complex;cytosol;cytosolic small ribosomal subunit;nucleolus	1;1;1;1;1;1;1	structural constituent of ribosome;fibroblast growth factor binding;protein binding;RNA binding	1;1;1;1	mRNA metabolic process;nuclear-transcribed mRNA catabolic process, nonsense-mediated decay;gene expression;translation;viral infectious cycle;viral transcription;viral process;translational termination;RNA metabolic process;translational elongation;translational initiation;cellular protein metabolic process;SRP-dependent cotranslational protein targeting to membrane	1;1;1;1;1;1;1;1;1;1;1;1;1	P15880
1147	IPI:IPI00013917.3	40S ribosomal protein S12	RPS12	40S ribosomal protein S12	P25398	RS12_HUMAN	1	11	11	11	65.2	65.2	14.515	132	0	0.024793	-0.0980225	0	0.0183504	-0.105452	7	0.981614	2.2525	0.153085	0.556502	FALSE	-10.1209	0.00962191	0.0487708	TRUE	+				1147	;P25398(IPI00013917)	GO:0005840;GO:0005737;GO:0005829;GO:0005622;GO:0030529;GO:0022627	1;1;1;1;1;1	GO:0003674;GO:0003735	1;1	GO:0019058;GO:0044267;GO:0000184;GO:0016032;GO:0006614;GO:0006413;GO:0006412;GO:0006414;GO:0016070;GO:0006415;GO:0010467;GO:0019083;GO:0016071	1;1;1;1;1;1;1;1;1;1;1;1;1	ribosome;ribonucleoprotein complex;intracellular;cytoplasm;cytosol;cytosolic small ribosomal subunit	1;1;1;1;1;1	structural constituent of ribosome;molecular_function	1;1	mRNA metabolic process;nuclear-transcribed mRNA catabolic process, nonsense-mediated decay;gene expression;translation;viral infectious cycle;viral transcription;viral process;translational termination;RNA metabolic process;translational elongation;translational initiation;cellular protein metabolic process;SRP-dependent cotranslational protein targeting to membrane	1;1;1;1;1;1;1;1;1;1;1;1;1	P25398
1190	IPI:IPI00014312.1;IPI:IPI00382458.1	Cullin-3	CUL3;KIAA0617	Isoform 1 of Cullin-3;Isoform 2 of Cullin-3;Isoform 3 of Cullin-3	Q13618-1;Q13618;Q13618-2;Q13618-3	CUL3_HUMAN	3	18	18	18	25.7	25.7	88.929	768	0	-0.107497	-0.487023	0	-0.112779	-0.474051	7	0.977686	-13.2703	0.00563067	0.309054	FALSE	-12.5022	0.00633704	0.0417556	TRUE	+				1190	;Q13618(IPI00382458;IPI00014312)	GO:0005827;GO:0031461;GO:0031463;GO:0005634;GO:0005794	1;1;1;1;1	GO:0031208;GO:0031625;GO:0005515;GO:0030332;GO:0004842	1;1;1;1;1	GO:0016477;GO:0000090;GO:0048208;GO:0097193;GO:0000209;GO:0007369;GO:0032467;GO:0000910;GO:0008054;GO:0016055;GO:0000082;GO:0016567;GO:0051322;GO:0007050;GO:0016192;GO:0006511;GO:0040016;GO:0017145;GO:0007229;GO:0001831;GO:0006810;GO:0000902;GO:0006513;GO:0001701;GO:0043161;GO:0006888;GO:0035024;GO:0043149;GO:0008284	1;1;1;1;1;1;1;1;1;1;1;1;1;1;1;1;1;1;1;1;1;1;1;1;1;1;1;1;1	cullin-RING ubiquitin ligase complex;nucleus;polar microtubule;Golgi apparatus;Cul3-RING ubiquitin ligase complex	1;1;1;1;1	ubiquitin protein ligase binding;ubiquitin-protein ligase activity;POZ domain binding;cyclin binding;protein binding	1;1;1;1;1	intrinsic apoptotic signaling pathway;protein monoubiquitination;stress fiber assembly;positive regulation of cytokinesis;integrin-mediated signaling pathway;Wnt receptor signaling pathway;cytokinesis;proteasomal ubiquitin-dependent protein catabolic process;COPII vesicle coating;cell morphogenesis;embryonic cleavage;cell migration;in utero embryonic development;vesicle-mediated transport;ER to G…	1;1;1;1;1;1;1;1;1;1;1;1;1;1;1;1;1;1;1;1;1;1;1;1;1;1;1;1;1	Q13618
1191	IPI:IPI00014319.5	Influenza virus NS1A-binding protein;Aryl hydrocarbon receptor-associated protein 3	IVNS1ABP;ARA3;FLARA3;KIAA0850;NS1;NS1BP;HSPC068	Influenza virus NS1A-binding protein	Q9Y6Y0	NS1BP_HUMAN	1	8	8	8	18.2	18.2	71.729	642	0	-0.0267177	-0.455117	0	-0.0734552	-0.444859	7	0.998631	-0.609314	0.604314	0.844296	FALSE	-21.8198	0.00209378	0.0330512	TRUE	+				1191	;Q9Y6Y0(IPI00014319)	GO:0005737;GO:0005681;GO:0005667;GO:0005856;GO:0005634;GO:0005654	1;1;1;1;1;1			GO:0043066;GO:0008380;GO:0019048;GO:0009615;GO:0006383	1;1;1;1;1	nucleoplasm;transcription factor complex;nucleus;spliceosomal complex;cytoplasm;cytoskeleton	1;1;1;1;1;1			negative regulation of apoptotic process;transcription from RNA polymerase III promoter;response to virus;modulation by virus of host morphology or physiology;RNA splicing	1;1;1;1;1	Q9Y6Y0
1227	IPI:IPI00015018.1	Inorganic pyrophosphatase;Pyrophosphate phospho-hydrolase	PPA1;IOPPP;PP	Inorganic pyrophosphatase	Q15181	IPYR_HUMAN	1	21	21	21	72	72	32.66	289	0	0.00325277	-0.0723822	0	0.0135537	-0.073221	7	0.999276	0.984252	0.428759	0.751852	FALSE	-21.0389	0.00225156	0.0330512	TRUE	+				1227	;Q15181(IPI00015018)	GO:0005737;GO:0005829	1;1	GO:0000287;GO:0004427;GO:0016787;GO:0016462;GO:0046872	1;1;1;1;1	GO:0006796;GO:0006418;GO:0071344;GO:0010467	1;1;1;1	cytoplasm;cytosol	1;1	inorganic diphosphatase activity;magnesium ion binding;pyrophosphatase activity;hydrolase activity;metal ion binding	1;1;1;1;1	phosphate-containing compound metabolic process;tRNA aminoacylation for protein translation;gene expression;diphosphate metabolic process	1;1;1;1	Q15181
1261	IPI:IPI00015808.3	Nucleolar GTP-binding protein 2;Autoantigen NGP-1	GNL2;NGP1	Nucleolar GTP-binding protein 2	Q13823	NOG2_HUMAN	1	13	13	13	15.7	15.7	83.654	731	0	0.0144427	-0.396806	0	0.0168282	-0.388494	7	0.999521	0.519727	0.655054	0.872587	FALSE	-28.1112	0.00126304	0.03031	TRUE	+				1261	;Q13823(IPI00015808)	GO:0005730;GO:0005634	1;1	GO:0000166;GO:0003924;GO:0005525	1;1;1	GO:0006184;GO:0008150;GO:0042254	1;1;1	nucleus;nucleolus	1;1	GTP binding;GTPase activity;nucleotide binding	1;1;1	ribosome biogenesis;biological_process;GTP catabolic process	1;1;1	Q13823
1290	IPI:IPI00184477.2;IPI:IPI00016006.2	Gephyrin	GPHN;GPH;KIAA1385	Isoform 2 of Gephyrin;Isoform 1 of Gephyrin	Q9NQX3-2;Q9NQX3;Q9NQX3-1	GEPH_HUMAN	2	8	8	8	12.4	12.4	83.447	769	0	0.00570768	-0.0609284	0	-0.0281684	-0.060322	7	0.99701	-0.532997	0.64733	0.86876	FALSE	-90.4014	0.000122341	0.0185407	TRUE	+				1290	;Q9NQX3(IPI00184477;IPI00016006)	GO:0016020;GO:0030054;GO:0005737;GO:0045202;GO:0005886;GO:0045211;GO:0005856;GO:0005622	1;1;1;1;1;1;1;1	GO:0005524;GO:0000166;GO:0003824;GO:0046872;GO:0016740	1;1;1;1;1	GO:0032324;GO:0006777;GO:0008152;GO:0006766;GO:0006767;GO:0007529;GO:0044281	1;1;1;1;1;1;1	cell junction;plasma membrane;intracellular;cytoplasm;synapse;cytoskeleton;postsynaptic membrane;membrane	1;1;1;1;1;1;1;1	transferase activity;catalytic activity;ATP binding;nucleotide binding;metal ion binding	1;1;1;1;1	establishment of synaptic specificity at neuromuscular junction;Mo-molybdopterin cofactor biosynthetic process;metabolic process;small molecule metabolic process;water-soluble vitamin metabolic process;vitamin metabolic process;molybdopterin cofactor biosynthetic process	1;1;1;1;1;1;1	Q9NQX3
1356	IPI:IPI00017256.6	Ras suppressor protein 1	RSU1;RSP1	Ras suppressor protein 1	Q15404	RSU1_HUMAN	1	6	6	6	19.5	19.5	31.54	277	0	-0.134565	-0.759915	0	-0.188984	-0.743877	7	0.986139	-3.1864	0.0859793	0.468548	FALSE	-28.9725	0.0011892	0.0302484	TRUE	+				1356	;Q15404(IPI00017256)	GO:0005829	1			GO:0007165;GO:0007265;GO:0034329	1;1;1	cytosol	1			Ras protein signal transduction;signal transduction;cell junction assembly	1;1;1	Q15404
1382	IPI:IPI00017617.1	Probable ATP-dependent RNA helicase DDX5;DEAD box protein 5;RNA helicase p68	DDX5;G17P1;HELR;HLR1	Probable ATP-dependent RNA helicase DDX5	P17844	DDX5_HUMAN	1	38	28	28	52	41.9	69.147	614	0	-0.0582349	-0.498835	0	-0.117209	-0.467708	7	0.994285	-1.69593	0.231987	0.621571	FALSE	-11.8749	0.00701698	0.0432984	TRUE	+				1382	;P17844(IPI00017617)	GO:0005681;GO:0005730;GO:0005634;GO:0071013;GO:0030529	1;1;1;1;1	GO:0030331;GO:0003723;GO:0005524;GO:0004386;GO:0008026;GO:0050681;GO:0016787;GO:0005515;GO:0000166;GO:0003712;GO:0048306;GO:0005516;GO:0003724;GO:0003676;GO:0036002;GO:0004004;GO:0003713;GO:0016818;GO:0019899	1;1;1;1;1;1;1;1;1;1;1;1;1;1;1;1;1;1;1	GO:0000381;GO:2001014;GO:0045944;GO:0045667;GO:0072332;GO:0016049;GO:0060765;GO:0045893;GO:0000122;GO:0045069;GO:0007623;GO:0006397;GO:0001701;GO:0006351;GO:0043517;GO:0033148;GO:0000398;GO:0008380;GO:0006355	1;1;1;1;1;1;1;1;1;1;1;1;1;1;1;1;1;1;1	catalytic step 2 spliceosome;nucleus;ribonucleoprotein complex;spliceosomal complex;nucleolus	1;1;1;1;1	pre-mRNA binding;hydrolase activity, acting on acid anhydrides, in phosphorus-containing anhydrides;RNA helicase activity;calcium-dependent protein binding;calmodulin binding;estrogen receptor binding;ATP binding;transcription coactivator activity;RNA binding;androgen receptor binding;hydrolase activity;transcription cofactor activity;helicase activity;enzyme binding;nucleotide binding;protein bi…	1;1;1;1;1;1;1;1;1;1;1;1;1;1;1;1;1;1;1	positive regulation of DNA damage response, signal transduction by p53 class mediator;in utero embryonic development;regulation of osteoblast differentiation;intrinsic apoptotic signaling pathway by p53 class mediator;positive regulation of transcription, DNA-dependent;positive regulation of intracellular estrogen receptor signaling pathway;transcription, DNA-dependent;positive regulation of tran…	1;1;1;1;1;1;1;1;1;1;1;1;1;1;1;1;1;1;1	P17844
1386	IPI:IPI00017672.4	Purine nucleoside phosphorylase;Inosine phosphorylase	NP;PNP	cDNA FLJ25678 fis, clone TST04067, highly similar to PURINE NUCLEOSIDE PHOSPHORYLASE	P00491	PNPH_HUMAN	3	20	20	20	78.5	78.5	32.551	293	0	0.00707919	-0.118045	0	0.00379123	-0.10945	7	0.998731	0.175088	0.877132	0.953894	FALSE	-10.021	0.00981188	0.049092	TRUE	+				1386	;P00491(IPI00017672)	GO:0005737;GO:0005829;GO:0005856;GO:0005622	1;1;1;1	GO:0016763;GO:0001882;GO:0042301;GO:0004731;GO:0008144;GO:0002060;GO:0003824;GO:0016757;GO:0016740	1;1;1;1;1;1;1;1;1	GO:0009116;GO:0034418;GO:0034356;GO:0006195;GO:0006738;GO:0044281;GO:0070970;GO:0042102;GO:0042493;GO:0006139;GO:0006148;GO:0055086;GO:0006144;GO:0046638;GO:0006955;GO:0043101	1;1;1;1;1;1;1;1;1;1;1;1;1;1;1;1	intracellular;cytoplasm;cytosol;cytoskeleton	1;1;1;1	transferase activity;catalytic activity;purine-nucleoside phosphorylase activity;nucleoside binding;drug binding;transferase activity, transferring glycosyl groups;transferase activity, transferring pentosyl groups;phosphate ion binding;purine nucleobase binding	1;1;1;1;1;1;1;1;1	interleukin-2 secretion;purine nucleotide catabolic process;nucleobase-containing small molecule metabolic process;nicotinamide riboside catabolic process;response to drug;small molecule metabolic process;nucleoside metabolic process;inosine catabolic process;immune response;purine-containing compound salvage;positive regulation of alpha-beta T cell differentiation;urate biosynthetic process;nucl…	1;1;1;1;1;1;1;1;1;1;1;1;1;1;1;1	P00491
1427	IPI:IPI00018349.5	DNA replication licensing factor MCM4;CDC21 homolog;P1-CDC21	MCM4;CDC21	DNA replication licensing factor MCM4	P33991	MCM4_HUMAN	3	40	40	40	52.1	52.1	96.557	863	0	0.0349679	-0.214151	0	0.0216421	-0.218312	7	0.991562	0.448774	0.697533	0.890674	FALSE	-46.5216	0.000461733	0.0235882	TRUE	+				1427	;P33991(IPI00018349)	GO:0005730;GO:0042555;GO:0005654;GO:0005634	1;1;1;1	GO:0003677;GO:0005524;GO:0004386;GO:0003697;GO:0016787;GO:0005515;GO:0000166;GO:0017111;GO:0004003;GO:0003678	1;1;1;1;1;1;1;1;1;1	GO:0006268;GO:0000278;GO:0006271;GO:0006260;GO:0006270;GO:0000082;GO:0007049	1;1;1;1;1;1;1	nucleoplasm;nucleus;nucleolus;MCM complex	1;1;1;1	DNA binding;ATP binding;ATP-dependent DNA helicase activity;DNA helicase activity;hydrolase activity;nucleoside-triphosphatase activity;single-stranded DNA binding;helicase activity;nucleotide binding;protein binding	1;1;1;1;1;1;1;1;1;1	mitotic cell cycle;DNA replication initiation;cell cycle;DNA unwinding involved in DNA replication;DNA replication;G1/S transition of mitotic cell cycle;DNA strand elongation involved in DNA replication	1;1;1;1;1;1;1	P33991
1439	IPI:IPI00018522.4;IPI:IPI00215734.3;IPI:IPI00914913.1	Protein arginine N-methyltransferase 1;Interferon receptor 1-bound protein 4	PRMT1;HMT2;HRMT1L2;IR1B4	HMT1 hnRNP methyltransferase-like 2 isoform 1;Isoform 2 of Protein arginine N-methyltransferase 1;Isoform 3 of Protein arginine N-methyltransferase 1	Q99873-1;Q99873;Q99873-2;Q99873-3	ANM1_HUMAN	5	21	21	21	55.3	55.3	42.461	371	0	-0.0342939	-0.307885	0	-0.0341623	-0.286404	7	0.994823	-1.26415	0.333556	0.690985	FALSE	-11.3636	0.0076553	0.0442336	TRUE	+				1439	No_Reviewed_Info
1539	IPI:IPI00020128.2	U3 small nucleolar RNA-associated protein 6 homolog;Hepatocellular carcinoma-associated antigen 66;Multiple hat domains protein	UTP6;C17orf40;HCA66;MHAT	U3 small nucleolar RNA-associated protein 6 homolog	Q9NYH9	UTP6_HUMAN	1	7	7	7	13.7	13.7	70.193	597	0	-0.0245791	-0.577266	0	-0.0722038	-0.616494	7	0.999291	-0.817697	0.499449	0.787783	FALSE	-10.6555	0.00869281	0.0463872	TRUE	+				1539	;Q9NYH9(IPI00020128)	GO:0005730;GO:0005634;GO:0005622	1;1;1			GO:0006364;GO:0006396	1;1	nucleus;intracellular;nucleolus	1;1;1			rRNA processing;RNA processing	1;1	Q9NYH9
1580	IPI:IPI00020944.1	Squalene synthetase;Farnesyl-diphosphate farnesyltransferase;FPP:FPP farnesyltransferase	FDFT1	Squalene synthetase	P37268	FDFT_HUMAN	1	16	16	16	43.4	43.4	48.115	417	0	0.00519248	-1.0906	0	-0.0338059	-1.14459	7	0.999992	-0.273647	0.810026	0.929472	FALSE	-13.7042	0.00528249	0.0383962	TRUE	+				1580	;P37268(IPI00020944)	GO:0016020;GO:0005783;GO:0016021;GO:0043231;GO:0005789	1;1;1;1;1	GO:0016491;GO:0051996;GO:0003824;GO:0016765;GO:0004310;GO:0016740	1;1;1;1;1;1	GO:0044255;GO:0009058;GO:0008610;GO:0008299;GO:0008152;GO:0006629;GO:0055114;GO:0044281;GO:0008202;GO:0016126;GO:0006695;GO:0045338;GO:0008203;GO:0006694	1;1;1;1;1;1;1;1;1;1;1;1;1;1	integral to membrane;endoplasmic reticulum membrane;intracellular membrane-bounded organelle;endoplasmic reticulum;membrane	1;1;1;1;1	transferase activity;squalene synthase activity;catalytic activity;oxidoreductase activity;transferase activity, transferring alkyl or aryl (other than methyl) groups;farnesyl-diphosphate farnesyltransferase activity	1;1;1;1;1;1	oxidation-reduction process;lipid metabolic process;lipid biosynthetic process;biosynthetic process;cholesterol biosynthetic process;steroid biosynthetic process;cholesterol metabolic process;small molecule metabolic process;isoprenoid biosynthetic process;sterol biosynthetic process;farnesyl diphosphate metabolic process;steroid metabolic process;metabolic process;cellular lipid metabolic process	1;1;1;1;1;1;1;1;1;1;1;1;1;1	P37268
1691	IPI:IPI00022373.2	RNA-binding protein NOB1;Protein ART-4;Phosphorylation regulatory protein HP-10	NOB1;ART4;NOB1P;PSMD8BP1;MSTP158	RNA-binding protein NOB1	Q9ULX3	NOB1_HUMAN	1	4	4	4	10.2	10.2	47.724	422	0	0.0276575	-0.46452	0	-0.0167049	-0.444447	7	0.998749	-0.182962	0.871696	0.952684	FALSE	-20.8228	0.00229839	0.0330512	TRUE	+				1691	;Q9ULX3(IPI00022373)	GO:0005634	1	GO:0046872	1			nucleus	1	metal ion binding	1			Q9ULX3
1702	IPI:IPI00022542.1	Rho-associated protein kinase 1;Rho-associated, coiled-coil-containing protein kinase 1;p160 ROCK-1;Renal carcinoma antigen NY-REN-35	ROCK1	Rho-associated protein kinase 1	Q13464	ROCK1_HUMAN	1	17	17	15	11.4	9.9	158.17	1354	0	-0.0887462	-0.687898	0	-0.128741	-0.65448	7	0.992944	-2.84422	0.104581	0.503003	FALSE	-10.9656	0.00821405	0.0451892	TRUE	+				1702	;Q13464(IPI00022542)	GO:0016020;GO:0042995;GO:0005737;GO:0000139;GO:0032059;GO:0005829;GO:0005886;GO:0005856;GO:0030027;GO:0005814;GO:0001726;GO:0005794	1;1;1;1;1;1;1;1;1;1;1;1	GO:0017048;GO:0005524;GO:0005515;GO:0004672;GO:0000166;GO:0016301;GO:0005543;GO:0046872;GO:0004674;GO:0016740;GO:0016772	1;1;1;1;1;1;1;1;1;1;1	GO:0007165;GO:0030036;GO:0006915;GO:0007266;GO:0050901;GO:0050900;GO:0016525;GO:0006939;GO:0045616;GO:2000114;GO:0003383;GO:0016310;GO:0007159;GO:0032956;GO:0051893;GO:0007411;GO:0032060;GO:0006468;GO:0043524;GO:2000145;GO:0035556;GO:0032970;GO:0006921;GO:0030155;GO:0051492;GO:0022614	1;1;1;1;1;1;1;1;1;1;1;1;1;1;1;1;1;1;1;1;1;1;1;1;1;1	bleb;Golgi membrane;plasma membrane;cell projection;centriole;Golgi apparatus;cytoplasm;cytosol;cytoskeleton;lamellipodium;membrane;ruffle	1;1;1;1;1;1;1;1;1;1;1;1	phospholipid binding;transferase activity;transferase activity, transferring phosphorus-containing groups;ATP binding;Rho GTPase binding;protein serine/threonine kinase activity;protein kinase activity;nucleotide binding;protein binding;kinase activity;metal ion binding	1;1;1;1;1;1;1;1;1;1;1	regulation of focal adhesion assembly;intracellular signal transduction;regulation of actin cytoskeleton organization;cellular component disassembly involved in execution phase of apoptosis;actin cytoskeleton organization;membrane to membrane docking;regulation of cell motility;apoptotic process;regulation of establishment of cell polarity;protein phosphorylation;regulation of stress fiber assemb…	1;1;1;1;1;1;1;1;1;1;1;1;1;1;1;1;1;1;1;1;1;1;1;1;1;1	Q13464
1750	IPI:IPI00023126.1	WD repeat-containing protein 46;WD repeat-containing protein BING4	WDR46;BING4;C6orf11;FP221	WD repeat-containing protein 46	O15213	WDR46_HUMAN	1	8	8	8	18.5	18.5	68.04	610	0	0.0410356	-0.745204	0	0.0565768	-0.741076	7	0.998925	0.409227	0.722037	0.898127	FALSE	-14.7591	0.00455935	0.0373904	TRUE	+				1750	;O15213(IPI00023126)	GO:0005575	1	GO:0003674	1	GO:0008150	1	cellular_component	1	molecular_function	1	biological_process	1	O15213
1775	IPI:IPI00023530.7	Cell division protein kinase 5;Cyclin-dependent kinase 5;Tau protein kinase II catalytic subunit;Serine/threonine-protein kinase PSSALRE	CDK5	Cell division protein kinase 5	Q00535	CDK5_HUMAN	1	17	16	16	59.6	56.8	33.304	292	0	-0.181113	-0.761604	0	-0.170673	-0.792537	7	0.973754	-6.68438	0.0216565	0.349545	FALSE	-21.1471	0.00222867	0.0330512	TRUE	+				1775	;Q00535(IPI00023530)	GO:0016020;GO:0030425;GO:0042995;GO:0031594;GO:0030054;GO:0005737;GO:0043025;GO:0030426;GO:0005829;GO:0045202;GO:0005886;GO:0045211;GO:0030424;GO:0005856;GO:0016533;GO:0005634;GO:0030027;GO:0014069;GO:0043204;GO:0030175	1;1;1;1;1;1;1;1;1;1;1;1;1;1;1;1;1;1;1;1	GO:0050321;GO:0005524;GO:0030549;GO:0046875;GO:0005515;GO:0004693;GO:0000166;GO:0004672;GO:0043125;GO:0005176;GO:0016301;GO:0002039;GO:0004674;GO:0016740;GO:0016772	1;1;1;1;1;1;1;1;1;1;1;1;1;1;1	GO:0007596;GO:0021766;GO:0032092;GO:0021987;GO:0014044;GO:0009611;GO:0021537;GO:0021697;GO:0048709;GO:0006915;GO:0046777;GO:0007160;GO:0018105;GO:0001764;GO:0009790;GO:0090314;GO:0007519;GO:0007399;GO:0048675;GO:0051402;GO:0030866;GO:0048812;GO:0030517;GO:0060079;GO:2000251;GO:0021549;GO:0043525;GO:0043113;GO:0032801;GO:0048148;GO:0045956;GO:0048813;GO:0006913;GO:0070509;GO:0021695;GO:0051301;GO:…	1;1;1;1;1;1;1;1;1;1;1;1;1;1;1;1;1;1;1;1;1;1;1;1;1;1;1;1;1;1;1;1;1;1;1;1;1;1;1;1;1;1;1;1;1;1;1;1;1;1;1;1;1;1;1;1;1;1;1;1;1;1;1;1;1;1;1;1;1;1;1;1;1;1;1;1;1;1;1	neuronal cell body;cell junction;nucleus;plasma membrane;cell projection;dendrite;axon;cyclin-dependent protein kinase 5 holoenzyme complex;postsynaptic density;cytoplasm;filopodium;cytosol;growth cone;neuromuscular junction;synapse;perikaryon;cytoskeleton;lamellipodium;postsynaptic membrane;membrane	1;1;1;1;1;1;1;1;1;1;1;1;1;1;1;1;1;1;1;1	transferase activity;transferase activity, transferring phosphorus-containing groups;ATP binding;ephrin receptor binding;ErbB-3 class receptor binding;ErbB-2 class receptor binding;protein serine/threonine kinase activity;tau-protein kinase activity;p53 binding;protein kinase activity;nucleotide binding;protein binding;acetylcholine receptor activator activity;kinase activity;cyclin-dependent pro…	1;1;1;1;1;1;1;1;1;1;1;1;1;1;1	cerebellum development;neuron projection development;cerebellar cortex formation;peptidyl-serine phosphorylation;synaptic vesicle endocytosis;sensory perception of pain;protein localization to synapse;dendrite morphogenesis;neuron migration;negative regulation of transcription, DNA-dependent;intracellular protein transport;cell death;neuron apoptotic process;axon extension;regulation of synaptic …	1;1;1;1;1;1;1;1;1;1;1;1;1;1;1;1;1;1;1;1;1;1;1;1;1;1;1;1;1;1;1;1;1;1;1;1;1;1;1;1;1;1;1;1;1;1;1;1;1;1;1;1;1;1;1;1;1;1;1;1;1;1;1;1;1;1;1;1;1;1;1;1;1;1;1;1;1;1;1	Q00535
1791	IPI:IPI00023748.3	Nascent polypeptide-associated complex subunit alpha;Alpha-NAC	NACA;HSD48	Nascent polypeptide-associated complex subunit alpha	Q13765	NACA_HUMAN	2	4	4	4	25.6	25.6	23.384	215	0	-0.0231269	-0.133319	0	-0.0433368	-0.130563	7	0.986739	-0.770667	0.521494	0.798214	FALSE	-17.7779	0.0031491	0.0347039	TRUE	+				1791	;Q13765(IPI00023748)	GO:0005737;GO:0005854;GO:0005634	1;1;1	GO:0003677;GO:0005515;GO:0003713;GO:0017025	1;1;1;1	GO:0015031;GO:0048742;GO:0006412;GO:2000138;GO:0006810;GO:0006351;GO:1901227;GO:0061384;GO:0003231;GO:0043403;GO:0010664;GO:1901228;GO:0048633;GO:0019048	1;1;1;1;1;1;1;1;1;1;1;1;1;1	nascent polypeptide-associated complex;nucleus;cytoplasm	1;1;1	DNA binding;transcription coactivator activity;TBP-class protein binding;protein binding	1;1;1;1	transcription, DNA-dependent;transport;negative regulation of striated muscle cell apoptotic process;regulation of skeletal muscle fiber development;protein transport;translation;negative regulation of transcription from RNA polymerase II promoter involved in heart development;skeletal muscle tissue regeneration;positive regulation of cell proliferation involved in heart morphogenesis;positive re…	1;1;1;1;1;1;1;1;1;1;1;1;1;1	Q13765
1799	IPI:IPI00023860.1	Nucleosome assembly protein 1-like 1;NAP-1-related protein	NAP1L1;NRP	Nucleosome assembly protein 1-like 1	P55209	NP1L1_HUMAN	1	9	7	7	22.5	19.9	45.374	391	0	0.0173558	-0.243308	0	0.00478087	-0.228002	7	0.998226	0.250836	0.825358	0.933262	FALSE	-12.991	0.00587321	0.0401844	TRUE	+				1799	;P55209(IPI00023860)	GO:0042470;GO:0005634	1;1	GO:0005515	1	GO:0006334;GO:0006260;GO:0008284	1;1;1	nucleus;melanosome	1;1	protein binding	1	nucleosome assembly;DNA replication;positive regulation of cell proliferation	1;1;1	P55209
1818	IPI:IPI00024167.1	ESF1 homolog;ABT1-associated protein	ESF1;ABTAP;C20orf6;HDCMC28P	ESF1 homolog	Q9H501	ESF1_HUMAN	1	10	10	10	12.6	12.6	98.795	851	0	-0.000307554	-0.529325	0	0.0252359	-0.50486	7	1	0.856757	0.48185	0.779888	FALSE	-10.2644	0.00935851	0.0480774	TRUE	+				1818	;Q9H501(IPI00024167)	GO:0005730;GO:0005634;GO:0005654	1;1;1			GO:0006351;GO:0006355	1;1	nucleoplasm;nucleus;nucleolus	1;1;1			transcription, DNA-dependent;regulation of transcription, DNA-dependent	1;1	Q9H501
1862	IPI:IPI00024719.1	Histone acetyltransferase type B catalytic subunit	HAT1	Histone acetyltransferase type B catalytic subunit	O14929	HAT1_HUMAN	1	18	18	18	54.2	54.2	49.512	419	0	-0.0370092	-0.196766	0	-0.0166096	-0.19808	7	0.984218	-0.742287	0.535252	0.806576	FALSE	-10.868	0.00836045	0.0455765	TRUE	+				1862	;O14929(IPI00024719)	GO:0005737;GO:0005730;GO:0043231;GO:0005634;GO:0005654;GO:0016363	1;1;1;1;1;1	GO:0005515;GO:0016746;GO:0004402;GO:0016740	1;1;1;1	GO:0006348;GO:0016568;GO:0016573;GO:0006323;GO:0006475;GO:0007584	1;1;1;1;1;1	nucleoplasm;nuclear matrix;nucleus;intracellular membrane-bounded organelle;cytoplasm;nucleolus	1;1;1;1;1;1	transferase activity;transferase activity, transferring acyl groups;protein binding;histone acetyltransferase activity	1;1;1;1	chromatin silencing at telomere;histone acetylation;chromatin modification;internal protein amino acid acetylation;DNA packaging;response to nutrient	1;1;1;1;1;1	O14929
1879	IPI:IPI00024975.2	Kinesin-like protein KIF15;Kinesin-like protein 2;Kinesin-like protein 7;Serologically defined breast cancer antigen NY-BR-62	KIF15;KLP2;KNSL7	Isoform 1 of Kinesin-like protein KIF15;Isoform 2 of Kinesin-like protein KIF15;Isoform 4 of Kinesin-like protein KIF15	Q9NS87-1;Q9NS87;Q9NS87-2;Q9NS87-4	KIF15_HUMAN	5	14	14	14	12.9	12.9	160.16	1388	0	-0.0209958	-0.27811	0	-0.084386	-0.294222	7	0.9977	-1.03747	0.408497	0.742786	FALSE	-16.0872	0.00384177	0.0355093	TRUE	+				1879	;Q9NS87(IPI00024975)	GO:0005874;GO:0005737;GO:0005873;GO:0005829;GO:0005819;GO:0005871;GO:0005856;GO:0005813	1;1;1;1;1;1;1;1	GO:0003677;GO:0005524;GO:0003774;GO:0000166;GO:0008017;GO:0003777	1;1;1;1;1;1	GO:0007596;GO:0007067;GO:0019886;GO:0008283;GO:0007018	1;1;1;1;1	kinesin complex;spindle;centrosome;cytoplasm;cytosol;plus-end kinesin complex;cytoskeleton;microtubule	1;1;1;1;1;1;1;1	microtubule binding;microtubule motor activity;DNA binding;ATP binding;motor activity;nucleotide binding	1;1;1;1;1;1	cell proliferation;mitosis;microtubule-based movement;antigen processing and presentation of exogenous peptide antigen via MHC class II;blood coagulation	1;1;1;1;1	Q9NS87
1903	IPI:IPI00025273.1	Trifunctional purine biosynthetic protein adenosine-3;Phosphoribosylamine--glycine ligase;Glycinamide ribonucleotide synthetase;Phosphoribosylglycinamide synthetase;Phosphoribosylformylglycinamidine cyclo-ligase;Phosphoribosyl-aminoimidazole synthetase;AIR synthase;Phosphoribosylglycinamide formyltransferase;5'-phosphoribosylglycinamide transformylase;GAR transformylase	GART;PGFT;PRGS	Isoform Long of Trifunctional purine biosynthetic protein adenosine-3;Isoform Short of Trifunctional purine biosynthetic protein adenosine-3	P22102-1;P22102;P22102-2	PUR2_HUMAN	2	42	42	42	51	51	107.77	1010	0	-0.0446748	-0.297877	0	-0.0478483	-0.291674	7	0.990285	-1.84021	0.207099	0.604083	FALSE	-23.0804	0.00187194	0.0330512	TRUE	+				1903	;P22102(IPI00025273)	GO:0005737;GO:0005829	1;1	GO:0005524;GO:0008168;GO:0016874;GO:0000166;GO:0004641;GO:0004637;GO:0003824;GO:0046872;GO:0016742;GO:0016740;GO:0004644	1;1;1;1;1;1;1;1;1;1;1	GO:0009058;GO:0032259;GO:0008152;GO:0009113;GO:0044281;GO:0009168;GO:0006164;GO:0055086;GO:0006144;GO:0006189	1;1;1;1;1;1;1;1;1;1	cytoplasm;cytosol	1;1	transferase activity;catalytic activity;ATP binding;phosphoribosylamine-glycine ligase activity;phosphoribosylglycinamide formyltransferase activity;nucleotide binding;ligase activity;methyltransferase activity;hydroxymethyl-, formyl- and related transferase activity;phosphoribosylformylglycinamidine cyclo-ligase activity;metal ion binding	1;1;1;1;1;1;1;1;1;1;1	'de novo' IMP biosynthetic process;purine nucleobase biosynthetic process;purine ribonucleoside monophosphate biosynthetic process;biosynthetic process;nucleobase-containing small molecule metabolic process;small molecule metabolic process;methylation;metabolic process;purine nucleobase metabolic process;purine nucleotide biosynthetic process	1;1;1;1;1;1;1;1;1;1	P22102
1923	IPI:IPI00025616.1	DNA polymerase delta subunit 2;DNA polymerase delta subunit p50	POLD2	DNA polymerase delta subunit 2	P49005	DPOD2_HUMAN	1	9	9	9	28.1	28.1	51.289	469	0	-0.129247	-0.753702	0	-0.10089	-0.749314	7	0.987063	-2.30911	0.147226	0.554596	FALSE	-27.2196	0.00134697	0.0305817	TRUE	+				1923	;P49005(IPI00025616)	GO:0005730;GO:0005654;GO:0005634	1;1;1	GO:0003677;GO:0005515;GO:0016779;GO:0003887;GO:0016740	1;1;1;1;1	GO:0006289;GO:0006261;GO:0000278;GO:0000722;GO:0006271;GO:0006297;GO:0032201;GO:0006260;GO:0006283;GO:0006284;GO:0006281;GO:0000723	1;1;1;1;1;1;1;1;1;1;1;1	nucleoplasm;nucleus;nucleolus	1;1;1	transferase activity;DNA binding;DNA-directed DNA polymerase activity;protein binding;nucleotidyltransferase activity	1;1;1;1;1	mitotic cell cycle;telomere maintenance;DNA-dependent DNA replication;transcription-coupled nucleotide-excision repair;telomere maintenance via semi-conservative replication;nucleotide-excision repair, DNA gap filling;DNA repair;base-excision repair;telomere maintenance via recombination;nucleotide-excision repair;DNA replication;DNA strand elongation involved in DNA replication	1;1;1;1;1;1;1;1;1;1;1;1	P49005
1963	IPI:IPI00026215.1	Flap endonuclease 1;Flap structure-specific endonuclease 1;Maturation factor 1;DNase IV	FEN1;RAD2	Flap endonuclease 1	P39748	FEN1_HUMAN	1	15	15	15	46.3	46.3	42.592	380	0	0.0171818	-0.240251	0	0.0320082	-0.253367	7	0.998217	0.982545	0.429427	0.752447	FALSE	-13.2579	0.0056411	0.0394443	TRUE	+				1963	;P39748(IPI00026215)	GO:0005730;GO:0005739;GO:0005634;GO:0005654	1;1;1;1	GO:0000287;GO:0003677;GO:0004523;GO:0008309;GO:0003690;GO:0016787;GO:0005515;GO:0030145;GO:0017108;GO:0003824;GO:0016788;GO:0004518;GO:0008409;GO:0004527;GO:0046872;GO:0048256;GO:0003684;GO:0004519	1;1;1;1;1;1;1;1;1;1;1;1;1;1;1;1;1;1	GO:0000278;GO:0000722;GO:0009650;GO:0006271;GO:0007613;GO:0090305;GO:0032201;GO:0006260;GO:0006302;GO:0048015;GO:0006284;GO:0043137;GO:0006974;GO:0006281;GO:0000723	1;1;1;1;1;1;1;1;1;1;1;1;1;1;1	nucleoplasm;mitochondrion;nucleus;nucleolus	1;1;1;1	damaged DNA binding;ribonuclease H activity;magnesium ion binding;5'-flap endonuclease activity;DNA binding;catalytic activity;nuclease activity;flap endonuclease activity;hydrolase activity, acting on ester bonds;5'-3' exonuclease activity;hydrolase activity;exonuclease activity;manganese ion binding;protein binding;double-stranded DNA binding;endonuclease activity;metal ion binding;double-stran…	1;1;1;1;1;1;1;1;1;1;1;1;1;1;1;1;1;1	mitotic cell cycle;telomere maintenance;double-strand break repair;telomere maintenance via semi-conservative replication;phosphatidylinositol-mediated signaling;response to DNA damage stimulus;DNA replication, removal of RNA primer;DNA repair;base-excision repair;telomere maintenance via recombination;nucleic acid phosphodiester bond hydrolysis;memory;DNA replication;DNA strand elongation involv…	1;1;1;1;1;1;1;1;1;1;1;1;1;1;1	P39748
[truncated: 2,981 more rows]
[truncated: 12 more columns]

## Sheet: Sheet1
Supplementary table 3 - occurrence filtered dataset (proteins present in all replicates at least at one time point)
id	A unique (consecutive) identifier for each row in the proteinGroups table, which is used to cross-link the information in this file with the information stored in the other files.
Protein.IDs	ID based on IPI database
Protein.Names	Protein names after reviewing against the UNIPROT database
Gene.Names	Protein gene names after reviewing against the UNIPROT database
Protein.Descriptions	Description
Uniprot	Uniprot id (unique)
Uniprot.Name	Uniprot AC
Proteins	number of p
Peptides..seq.	The total number of peptide sequences associated with the protein group (i.e. for all the proteins in the group).
Razor.Peptides..seq.	The total number of razor peptides (peptides assigned to this protein as the top scoring one containing that particular sequence) associated with the protein group (i.e. these peptides are shared with another protein group).
Unique.Peptides..seq.	The total number of unique peptides associated with the protein group (i.e. these peptides are not shared with another protein group).
Sequence.Coverage....	Percentage of the sequence that is covered by the identified peptides of the best protein sequence contained within the group.
[truncated: 50 more rows]
